# Supplementary material for: Mechanistic insights into catalyst-dependent divergent cycloaddition reactionsviadiscrimination between diazo compounds
Source: Royal Society of Chemistry journal article supplement (doi:10.1039/d2qo01787c), 2023-01-01
Supplement: d2qo01787c1.pdf [file d2qo01787c1.pdf]

*Supporting Information*

**Mechanistic insights into the catalyst-dependent divergent cycloaddition reactions via discrimination between diazo compounds**

Jing Wang, Xiao-Jun Liu,\* De-Zhan Chen and Jian-Biao Liu\*

*E-mail: xiaojunliu@sdu.edu.cn, jianbiaoliu.thu@sdu.edu.cn*

**Table of Contents**

|                                                                            |     |
|----------------------------------------------------------------------------|-----|
| 1. The other possible transition state for the [3 + 3]-cycloaddition ..... | S2  |
| 2. The calculated condensed Fukui function.....                            | S2  |
| 3. A comparison of the [3 + 2]-cycloaddition transition states.....        | S3  |
| 4. The other pathways for the formation of <b>2a'</b> .....                | S5  |
| 5. Additional results for the Rh-catalyzed C–C bond formation .....        | S8  |
| 6. Calculated energies and imaginary frequencies.....                      | S11 |
| 7. Cartesian coordinates of all optimized structures .....                 | S13 |

## 1. The other possible transition state for the [3 + 3]-cycloaddition

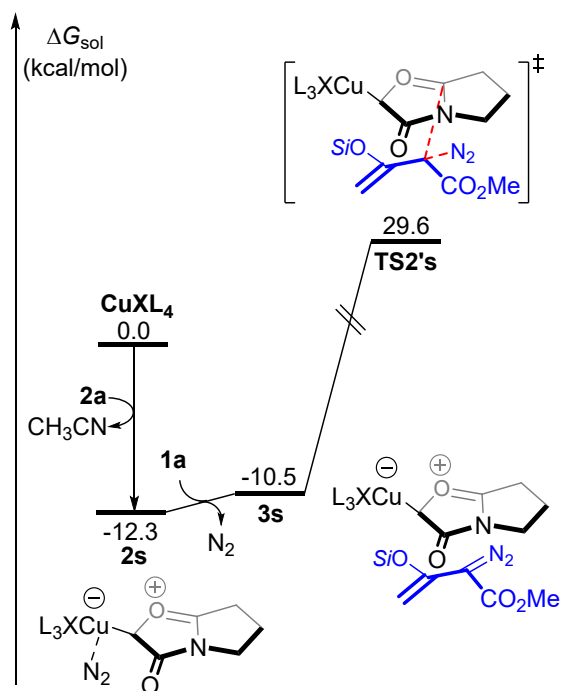

Fig. S1. Free energy profiles for the other possible transition state for the [3 + 3]-cycloaddition.

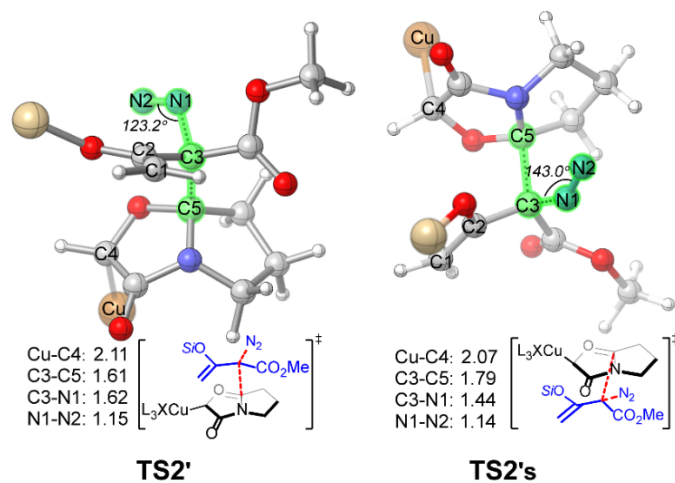

Fig. S2. Optimized structures of transition states  $\text{TS2'}$  and  $\text{TS2's}$  with selected bond distances in Å.

## 2. The calculated condensed Fukui function

To further study the local reactivity and regioselectivity for the Cu-catalyzed [3+3]-cycloaddition, the condensed Fukui function ( $f^-$  and  $f^+$  in Table S1) were calculated by Multiwfn 3.8 for enoldiazoacetate and carbonyl ylide to predict the active site. The  $f^+$  and  $f^-$  functions are used to identify the favorable reactive sites for nucleophilic and electrophilic attack respectively. For the enoldiazoacetate, the more electrophilic center corresponds with the carbon atom C1, with  $f^- = 0.207$ ,

while the more nucleophilic center corresponds with the C3, with  $f^+$ =0.077. For the carbonyl ylide, the C4 and C5 atoms are the electrophilic and nucleophilic centers respectively. As a consequence, the more favorable polar interaction should take place between C1 and C5 atoms, which is apparently in contrast to the experimental results. This inconsistency may arise from the steric effects caused by the TIPS group.

Table S1. The calculated condensed Fukui function for enoldiazoacetate and carbonyl ylide.

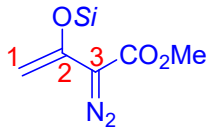

*enoldiazoacetate*



*carbonyl ylide*

|       | C1    | C2    | C3    | C4    | C5    |
|-------|-------|-------|-------|-------|-------|
| $f^-$ | 0.207 | 0.085 | 0.078 | 0.069 | 0.032 |
| $f^+$ | 0.068 | 0.022 | 0.077 | 0.051 | 0.156 |

### 3. A comparison of the [3 + 2]-cycloaddition transition states

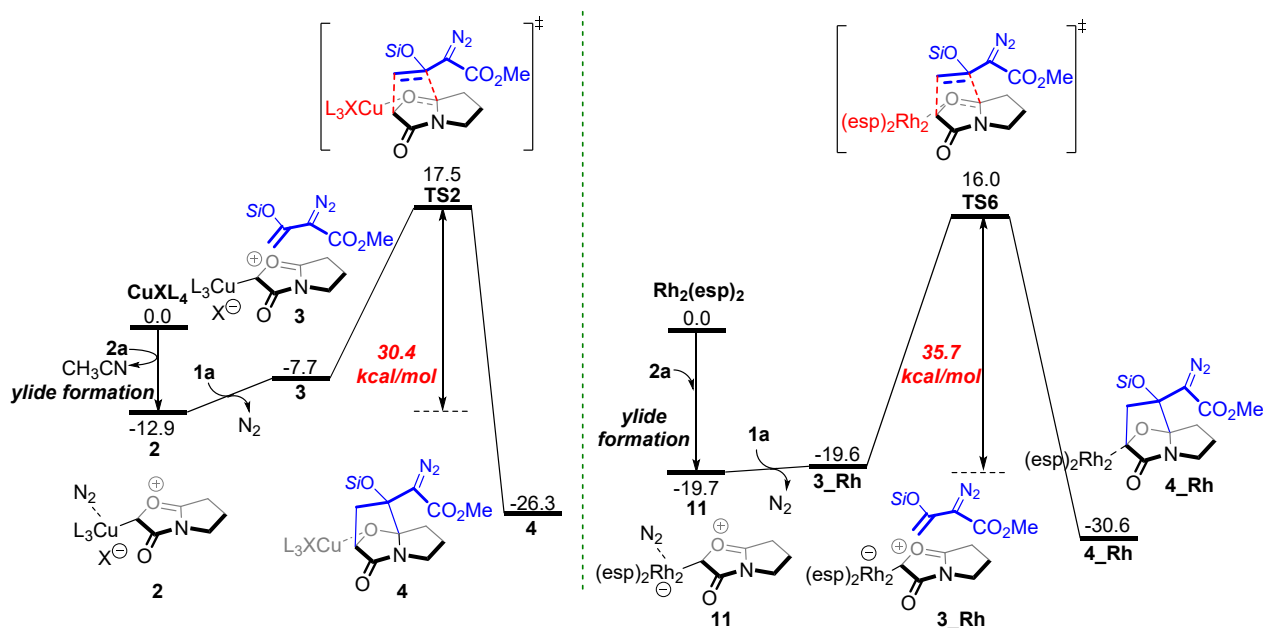

Fig. S3. Free energy profiles for the [3+2]-cycloaddition for both Cu(CH<sub>3</sub>CN)<sub>4</sub>BF<sub>4</sub> and Rh<sub>2</sub>(esp)<sub>2</sub> catalysts.

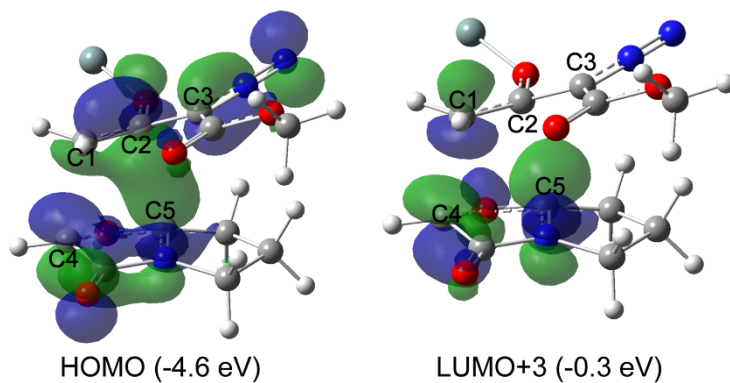

Fig. S4. Molecular orbitals showing the dominant orbital interactions in **TS2** at the B3LYP-D3(BJ)/6-31G(d,p)/ECP10MDF\_AVDZ(Cu) level (isovalue = 0.03; the coordinated Cu-catalyst is omitted for clarity).

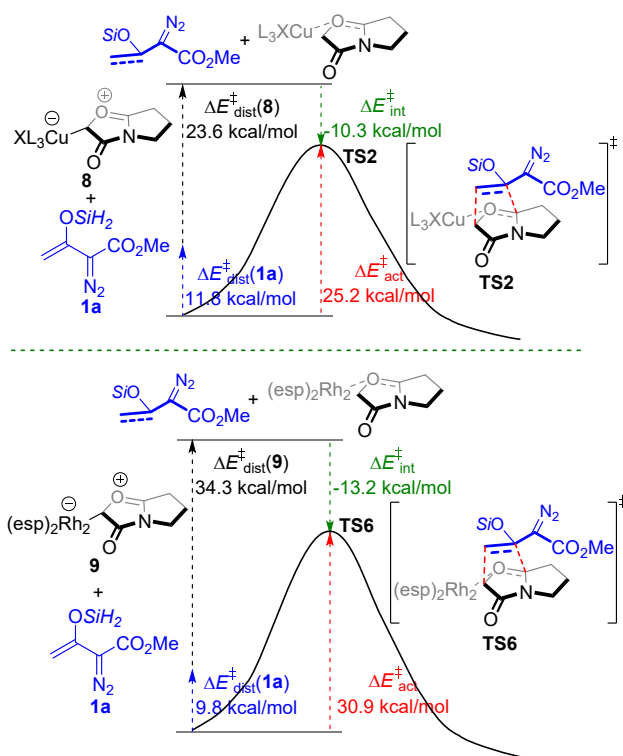

Fig. S5. Distortion-interaction analysis.

#### 4. The other pathways for the formation of 2a'

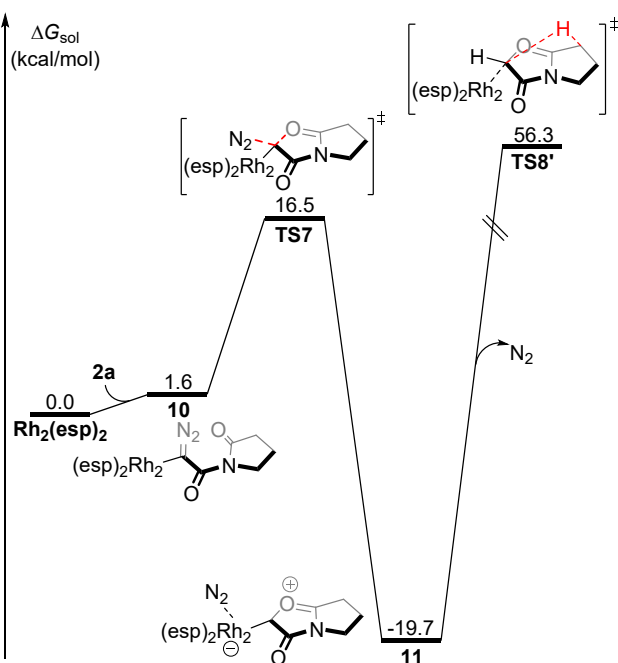

Fig. S6. Free energy profiles for the formation of **2a'** via the direct 1,4-hydrogen transfer.

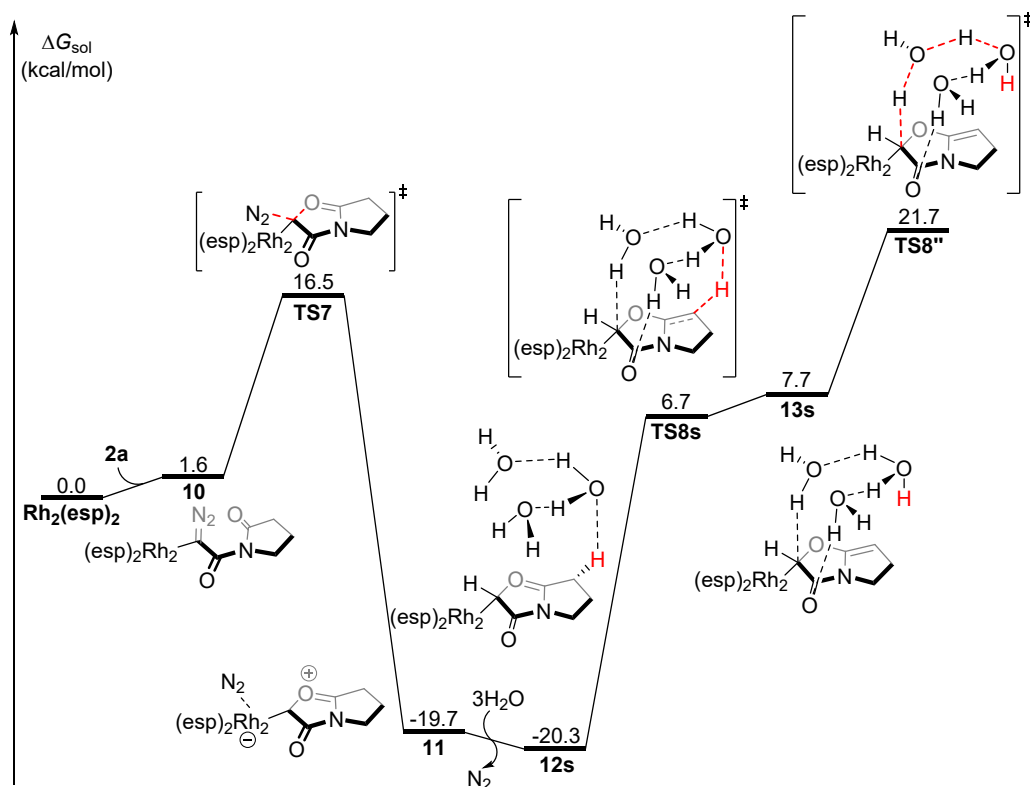

Fig. S7. Free energy profiles for the formation of **2a'** via the water-assisted stepwise H-shift process.

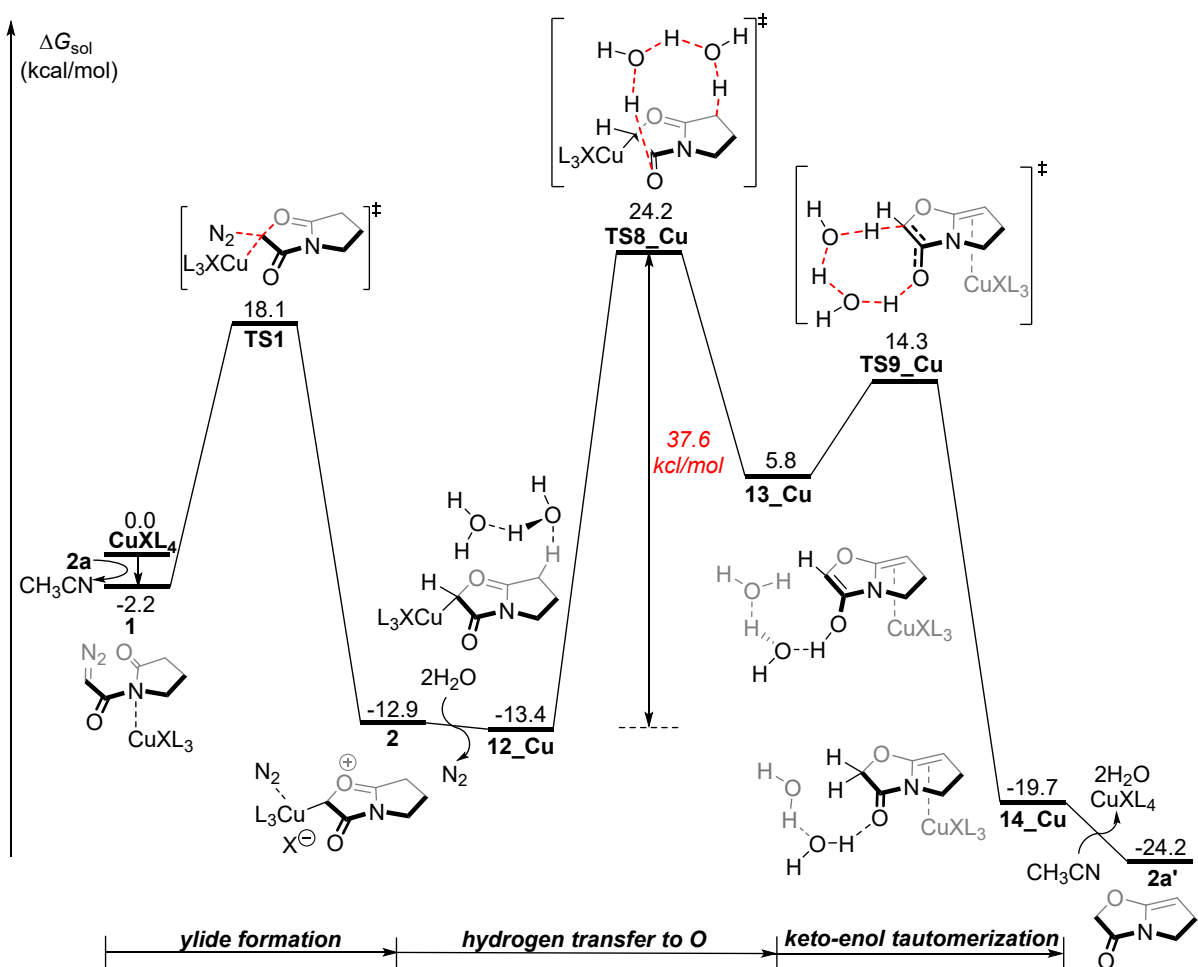

Fig. S8. Free energy profiles for the formation of **2a'** for the Cu(I) catalyst.

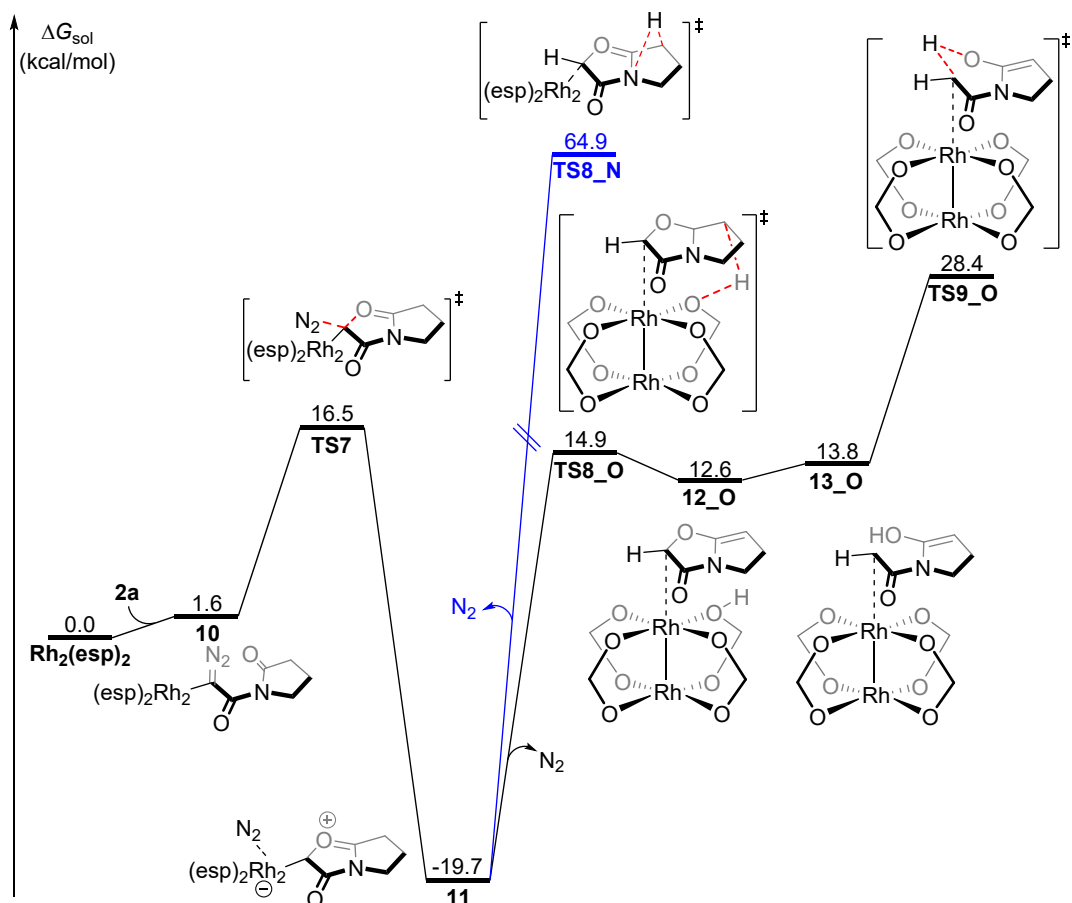

Fig. S9. Free energy profiles for the formation of **2a'** via hydrogen transfer to nitrogen atom or the carbonyl oxygen of the esp ligands.

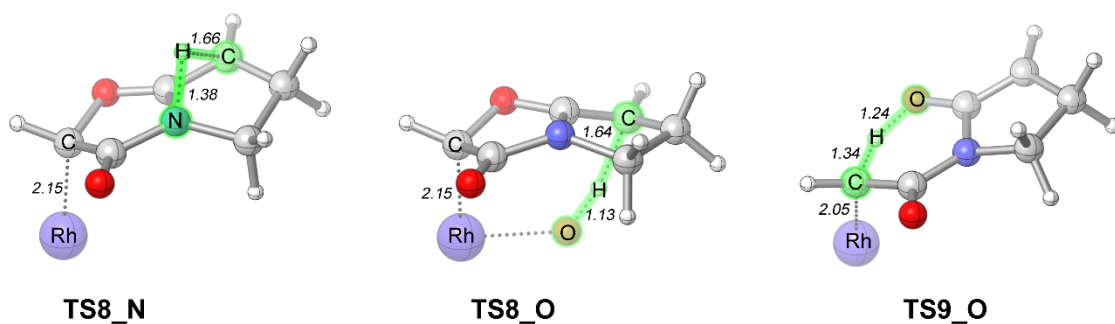

Fig. S10. Optimized structures of transition states **TS8\_N**, **TS8\_O** and **TS9\_O** with selected bond distances in Å.

## 5. Additional results for the Rh-catalyzed C–C bond formation

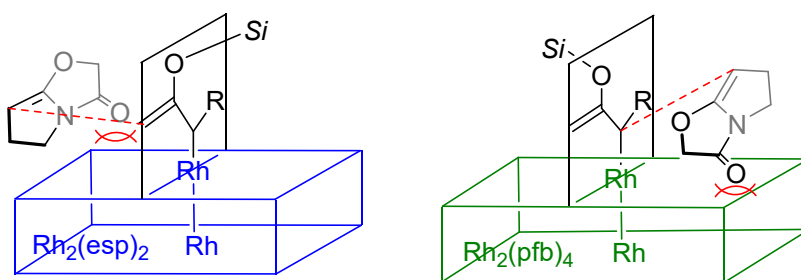

Fig. S11. The unfavorable transition states due to the steric repulsions.

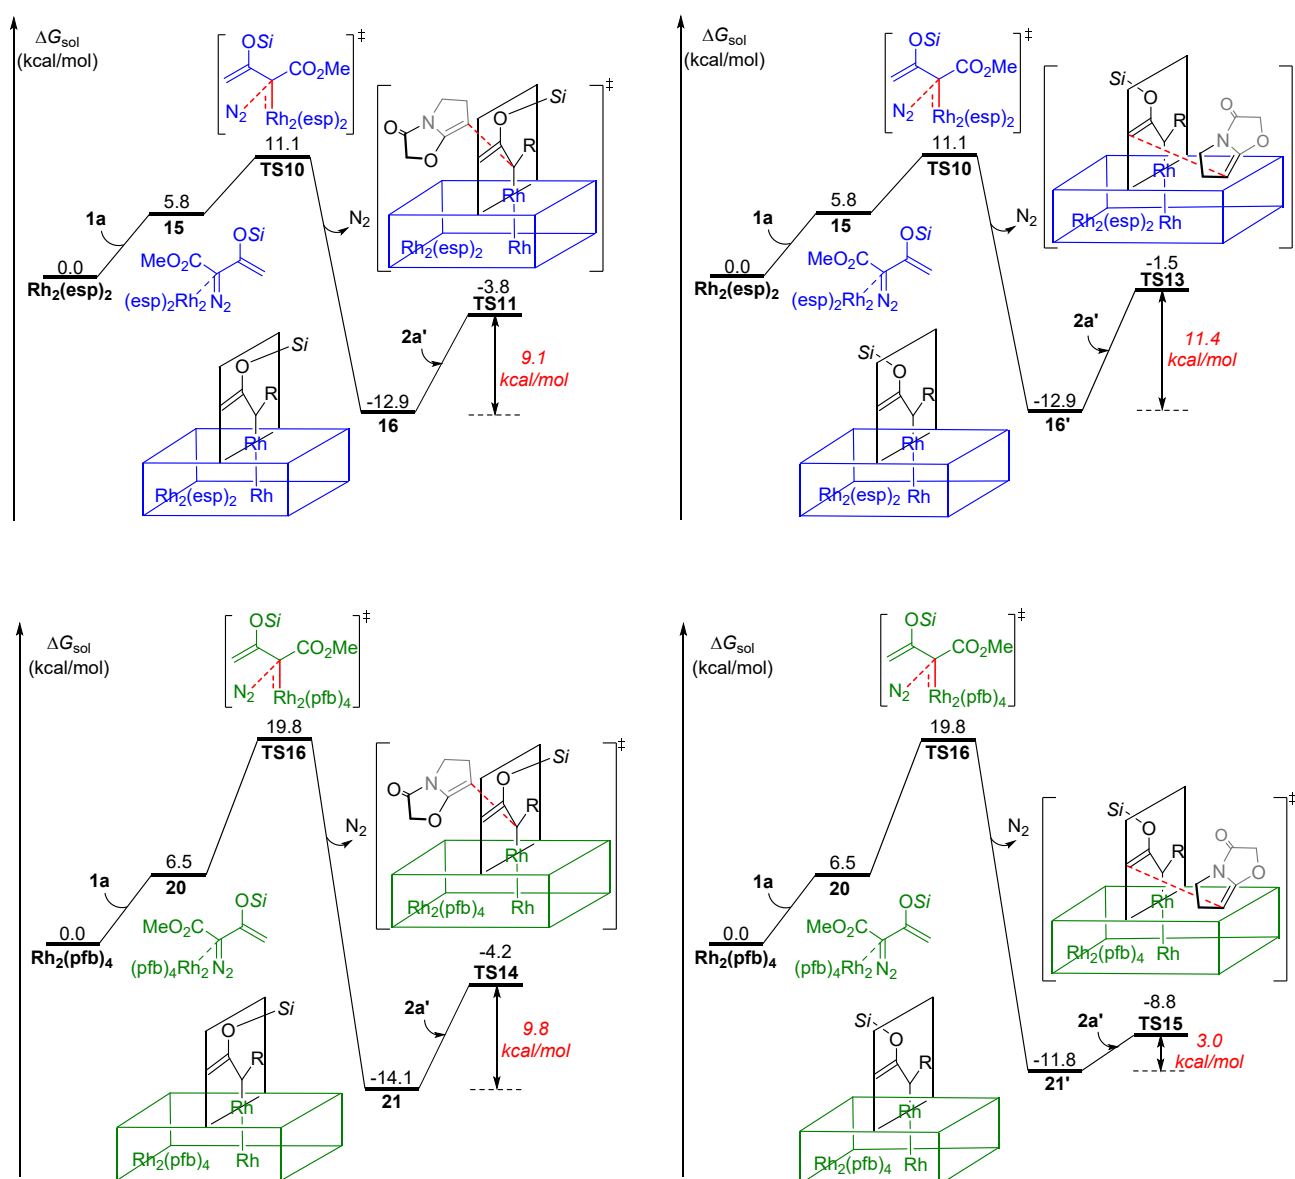



Fig. S12. Free energy profiles for the four C–C bond formation transition states.

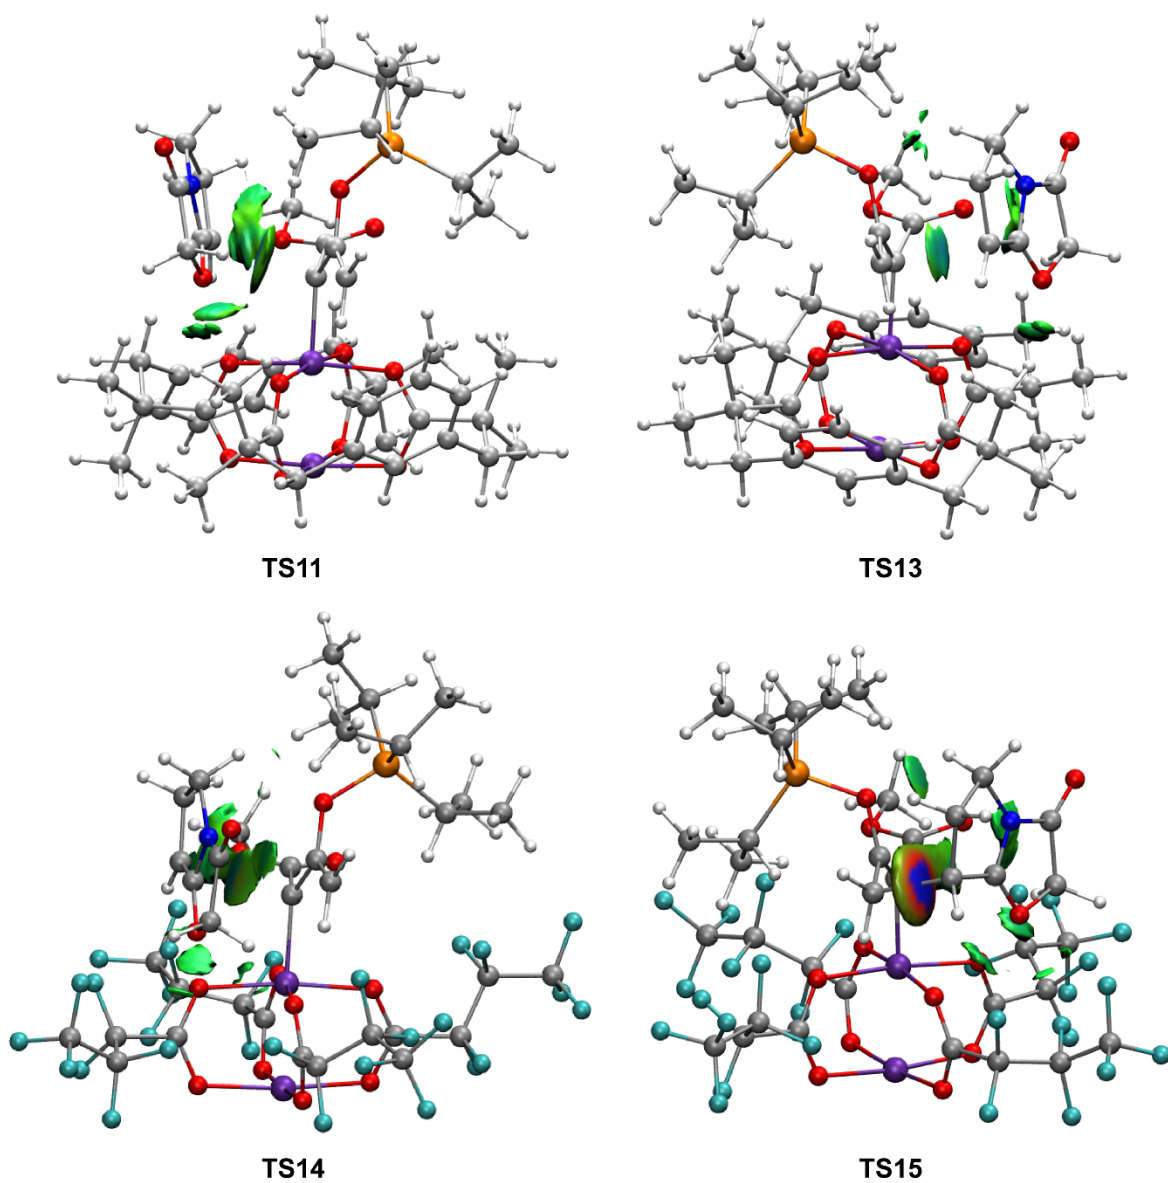

Fig. S13. IGMH maps of the four transition states (isovalue = 0.01 a.u.).

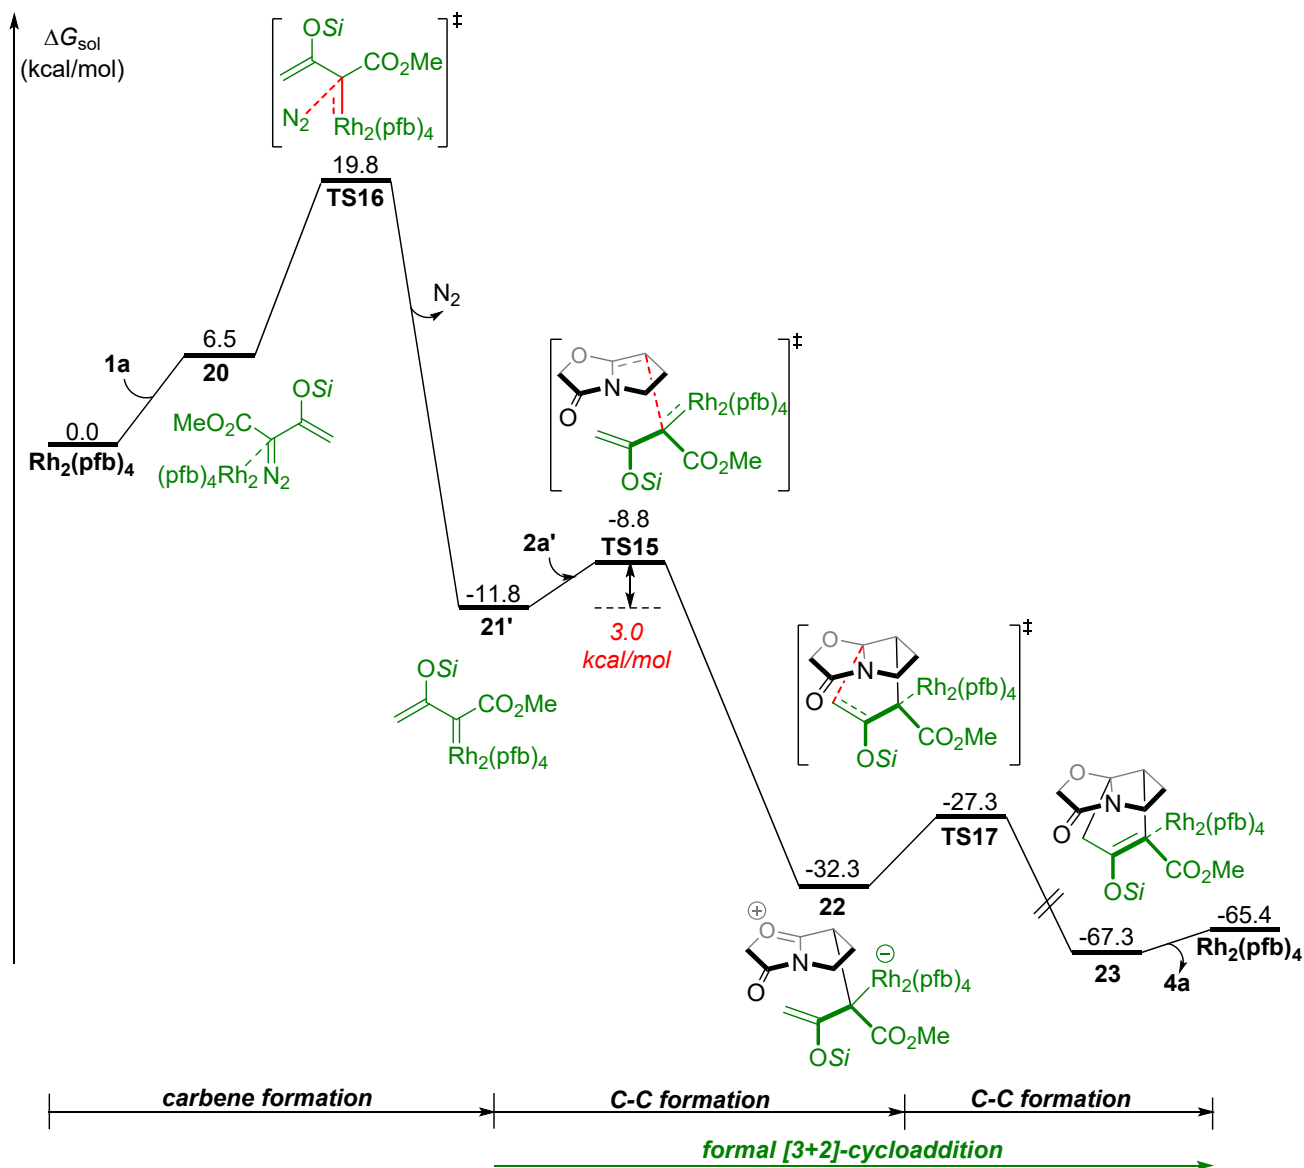

Fig. S14. Free energy profiles for  $\text{Rh}_2(\text{pfb})_4$ -catalyzed [3 + 2]-cycloaddition between diazo compounds **1a** and **2a'**.

## 6. Calculated energies and imaginary frequencies

Table S2. Calculated energies and imaginary frequencies.

| Stationary point                                      | Corrected thermal correction to Gibbs free energy at B3LYP-D3(BJ)/6-31G(d,p)/ECP10MDF_AVZDZ(Cu/Rh) (in a.u.) | Single-point energy including solvation energy at B3LYP-D3(BJ)/def2-TZVPP (in a.u.) | Imaginary frequencies (in $\text{cm}^{-1}$ ) |
|-------------------------------------------------------|--------------------------------------------------------------------------------------------------------------|-------------------------------------------------------------------------------------|----------------------------------------------|
| <b>Cu(CH<sub>3</sub>CN)<sub>4</sub>BF<sub>4</sub></b> | 0.143624                                                                                                     | -2596.6656181                                                                       |                                              |
| <b>CH<sub>3</sub>CN</b>                               | 0.022395                                                                                                     | -132.8258093                                                                        |                                              |
| <b>N<sub>2</sub></b>                                  | -0.012841                                                                                                    | -109.5683455                                                                        |                                              |
| <b>1a</b>                                             | 0.333129                                                                                                     | -1174.3179746                                                                       |                                              |
| <b>2a</b>                                             | 0.099707                                                                                                     | -547.7898907                                                                        |                                              |
| <b>3a</b>                                             | 0.45314                                                                                                      | -1503.0985321                                                                       |                                              |
| <b>1</b>                                              | 0.221404                                                                                                     | -3011.6337262                                                                       |                                              |
| <b>TS1</b>                                            | 0.218814                                                                                                     | -3011.5987169                                                                       | 420.52 <i>i</i>                              |
| <b>2</b>                                              | 0.217919                                                                                                     | -3011.6472977                                                                       |                                              |
| <b>3</b>                                              | 0.579117                                                                                                     | -4076.4038352                                                                       |                                              |
| <b>TS2</b>                                            | 0.577956                                                                                                     | -4076.3624738                                                                       | 488.75 <i>i</i>                              |
| <b>TS2'</b>                                           | 0.578248                                                                                                     | -4076.3368522                                                                       | 182.86 <i>i</i>                              |
| <b>4</b>                                              | 0.585989                                                                                                     | -4076.4403378                                                                       |                                              |
| <b>TS3</b>                                            | 0.579538                                                                                                     | -4076.3859435                                                                       | 170.28 <i>i</i>                              |
| <b>5</b>                                              | 0.57532                                                                                                      | -3966.8160886                                                                       |                                              |
| <b>TS4</b>                                            | 0.573178                                                                                                     | -3966.8126182                                                                       | 302.31 <i>i</i>                              |
| <b>6</b>                                              | 0.571034                                                                                                     | -3966.8458549                                                                       |                                              |
| <b>TS5</b>                                            | 0.574321                                                                                                     | -3966.8337783                                                                       | 206.56 <i>i</i>                              |
| <b>7</b>                                              | 0.583227                                                                                                     | -3966.9464366                                                                       |                                              |
| <b>TS6</b>                                            | 1.086722                                                                                                     | -3680.3316476                                                                       | 455.28 <i>i</i>                              |
| <b>8</b>                                              | 0.21864                                                                                                      | -2902.0743981                                                                       |                                              |
| <b>9</b>                                              | 0.727527                                                                                                     | -2506.0531443                                                                       |                                              |
| <b>Rh<sub>2</sub>(esp)<sub>2</sub></b>                | 0.605876                                                                                                     | -2067.7854497                                                                       |                                              |

|                                        |          |               |                  |
|----------------------------------------|----------|---------------|------------------|
| <b>Rh<sub>2</sub>(pfb)<sub>4</sub></b> | 0.122128 | -4230.3535864 |                  |
| <b>5a</b>                              | 0.452287 | -1503.1095273 |                  |
| <b>4a</b>                              | 0.451383 | -1503.1098969 |                  |
| <b>10</b>                              | 0.734252 | -2615.5983734 |                  |
| <b>TS7</b>                             | 0.728658 | -2615.5690391 | 383.91 <i>i</i>  |
| <b>11</b>                              | 0.727706 | -2615.6258763 |                  |
| <b>12</b>                              | 0.76875  | -2659.0211176 |                  |
| <b>TS8</b>                             | 0.765301 | -2658.9641277 | 343.63 <i>i</i>  |
| <b>13</b>                              | 0.770682 | -2658.9943343 |                  |
| <b>TS9</b>                             | 0.768142 | -2658.9731902 | 841.74 <i>i</i>  |
| <b>14</b>                              | 0.769066 | -2659.0283812 |                  |
| <b>2a'</b>                             | 0.094683 | -438.2452787  |                  |
| <b>TS8'</b>                            | 0.718236 | -2505.9171685 | 1423.60 <i>i</i> |
| <b>TS8''</b>                           | 0.785834 | -2735.4328771 | 719.04 <i>i</i>  |
| <b>TS8_Cu</b>                          | 0.25867  | -3054.9827918 | 486.98 <i>i</i>  |
| <b>15</b>                              | 0.968263 | -3242.1203559 |                  |
| <b>TS10</b>                            | 0.962269 | -3242.1059337 | 452.10 <i>i</i>  |
| <b>16</b>                              | 0.957834 | -3132.5615814 |                  |
| <b>17</b>                              | 1.076147 | -3570.8178495 |                  |
| <b>TS11</b>                            | 1.07909  | -3570.8159026 | 71.50 <i>i</i>   |
| <b>18</b>                              | 1.083522 | -3570.8538729 |                  |
| <b>TS12</b>                            | 1.085605 | -3570.8424504 | 344.65 <i>i</i>  |
| <b>19</b>                              | 1.088775 | -3570.922133  |                  |
| <b>TS13</b>                            | 1.081503 | -3570.8147342 | 19.02 <i>i</i>   |
| <b>TS14</b>                            | 0.598895 | -5733.3883151 | 51.67 <i>i</i>   |
| <b>TS15</b>                            | 0.602683 | -5733.3993493 | 362.33 <i>i</i>  |
| <b>2s</b>                              | 0.21888  | -3011.6472893 |                  |
| <b>3s</b>                              | 0.576645 | -4076.4058313 |                  |
| <b>TS2's</b>                           | 0.579577 | -4076.3448162 | 284.02 <i>i</i>  |

|               |          |               |                   |
|---------------|----------|---------------|-------------------|
| <b>3_Rh</b>   | 1.089205 | -3680.3908451 |                   |
| <b>4_Rh</b>   | 1.093518 | -3680.4127466 |                   |
| <b>12s</b>    | 0.78927  | -2735.5031871 |                   |
| <b>TS8s</b>   | 0.787269 | -2735.4581801 | 482.93 <i>i</i>   |
| <b>13s</b>    | 0.789265 | -2735.4586325 |                   |
| <b>12_Cu</b>  | 0.259926 | -3055.0440578 |                   |
| <b>13_Cu</b>  | 0.266813 | -3055.0202921 |                   |
| <b>TS9_Cu</b> | 0.261935 | -3055.001932  | 781.33 <i>i</i>   |
| <b>14_Cu</b>  | 0.266767 | -3055.0609435 |                   |
| <b>TS8_N</b>  | 0.719322 | -2505.9045053 | 1813.39 <i>i</i>  |
| <b>TS8_O</b>  | 0.722572 | -2505.9874765 | 846.60 <i>i</i>   |
| <b>12_O</b>   | 0.724401 | -2505.9929603 |                   |
| <b>13_O</b>   | 0.723559 | -2505.9900976 |                   |
| <b>TS9_O</b>  | 0.716531 | -2505.9599186 | 1667.51 <i>i</i>  |
| <b>16'</b>    | 0.958805 | -3132.5626147 |                   |
| <b>20</b>     | 0.484656 | -5404.6875977 |                   |
| <b>TS16</b>   | 0.482721 | -5404.6645234 | 360.0438 <i>i</i> |
| <b>21</b>     | 0.471573 | -5295.1290769 |                   |
| <b>21'</b>    | 0.475235 | -5295.1291148 |                   |
| <b>22</b>     | 0.605534 | -5733.439721  |                   |
| <b>TS17</b>   | 0.603677 | -5733.4298887 | 226.8529 <i>i</i> |
| <b>23</b>     | 0.606831 | -5733.496821  |                   |

## 7. Cartesian coordinates of all optimized structures

### Cu(CH<sub>3</sub>CN)<sub>4</sub>BF<sub>4</sub>

|    |             |             |             |
|----|-------------|-------------|-------------|
| Cu | -1.53062600 | -0.07669200 | -0.00925500 |
| N  | -0.88976600 | -1.88053300 | -0.67552500 |
| N  | -3.47550600 | 0.17450600  | 0.09024100  |
| N  | -0.55902500 | 1.22341600  | -1.20572600 |
| N  | -0.50295800 | 0.08536200  | 1.71432500  |

|   |             |             |             |
|---|-------------|-------------|-------------|
| C | -0.07853100 | -2.66253200 | -0.94494900 |
| C | -4.61986100 | 0.34597600  | 0.12459200  |
| C | 0.32498300  | 1.81626900  | -1.66255500 |
| C | 0.39095500  | 0.18703800  | 2.44344900  |
| C | -6.05477400 | 0.56336500  | 0.16333100  |
| H | -6.52509900 | 0.06698500  | -0.69033200 |
| H | -6.46564300 | 0.15349200  | 1.09033000  |
| H | -6.26569400 | 1.63572800  | 0.11808300  |
| C | 1.44755600  | 2.54573500  | -2.22271800 |
| H | 1.52959100  | 3.52005100  | -1.73256800 |
| H | 2.36550500  | 1.97817900  | -2.04568500 |
| H | 1.29698200  | 2.69314900  | -3.29576400 |
| C | 0.98315400  | -3.59808700 | -1.26505100 |
| H | 1.93523600  | -3.08069300 | -1.11866700 |
| H | 0.92913500  | -4.46770400 | -0.60424900 |
| H | 0.89589500  | -3.92557700 | -2.30463700 |
| C | 1.52921200  | 0.30826100  | 3.33541600  |
| H | 1.66886700  | 1.35843900  | 3.60679600  |
| H | 1.35755300  | -0.27980700 | 4.24111400  |
| H | 2.42279400  | -0.04718200 | 2.81507300  |
| B | 3.02019000  | 0.20206000  | 0.02218100  |
| F | 2.17096000  | -0.79660400 | -0.49856200 |
| F | 2.24558300  | 1.26655100  | 0.52493500  |
| F | 3.79549000  | -0.33841700 | 1.06386000  |
| F | 3.85426700  | 0.68550500  | -1.00293200 |

**CH<sub>3</sub>CN**

|   |             |             |             |
|---|-------------|-------------|-------------|
| N | 0.00000000  | 0.00000000  | 1.43818900  |
| C | 0.00000000  | 0.00000000  | 0.27730400  |
| C | 0.00000000  | 0.00000000  | -1.17924600 |
| H | 0.00000000  | 1.02812000  | -1.55189300 |
| H | 0.89037800  | -0.51406000 | -1.55189300 |
| H | -0.89037800 | -0.51406000 | -1.55189300 |

**N<sub>2</sub>**

|   |            |            |             |
|---|------------|------------|-------------|
| N | 0.00000000 | 0.00000000 | 0.55251400  |
| N | 0.00000000 | 0.00000000 | -0.55251400 |

**1a**

|   |             |             |             |
|---|-------------|-------------|-------------|
| C | -0.90916500 | 2.01881000  | -0.42376700 |
| H | -1.80731100 | 2.57697500  | -0.64215700 |
| H | 0.05222700  | 2.50713100  | -0.52254000 |
| C | -0.98512900 | 0.73651100  | -0.03419600 |
| C | -2.24202700 | -0.01401100 | 0.13493900  |

|           |             |             |             |
|-----------|-------------|-------------|-------------|
| N         | -2.11980600 | -1.27542200 | 0.48883700  |
| N         | -1.99987400 | -2.36142300 | 0.79598500  |
| C         | -3.60362000 | 0.48759500  | -0.05858600 |
| O         | -3.88257800 | 1.62761300  | -0.38681200 |
| O         | -4.51935800 | -0.47729500 | 0.17159300  |
| C         | -5.89443300 | -0.08177000 | 0.00124600  |
| H         | -6.48114000 | -0.97266200 | 0.22308700  |
| H         | -6.15096500 | 0.72403500  | 0.69279300  |
| H         | -6.07504300 | 0.24630600  | -1.02501600 |
| O         | 0.07202400  | -0.06188300 | 0.26544800  |
| Si        | 1.73665400  | 0.12338000  | -0.07187400 |
| C         | 2.43317800  | 1.56693300  | 0.95371000  |
| H         | 2.33982100  | 2.45412600  | 0.31015400  |
| C         | 2.41114000  | -1.55845000 | 0.47713700  |
| H         | 3.50192800  | -1.51014600 | 0.34684900  |
| C         | 1.95711600  | 0.47546100  | -1.92658300 |
| H         | 1.82166400  | 1.56106300  | -2.03549300 |
| C         | 0.91097300  | -0.20849500 | -2.82223600 |
| H         | -0.10629800 | 0.09855500  | -2.56401900 |
| H         | 1.07881600  | 0.05452100  | -3.87461100 |
| H         | 0.95985500  | -1.29919900 | -2.74908300 |
| C         | 3.38701400  | 0.13994400  | -2.39028700 |
| H         | 3.59664900  | -0.93176800 | -2.30107500 |
| H         | 3.52554100  | 0.41171800  | -3.44429800 |
| H         | 4.14850500  | 0.67535900  | -1.81323300 |
| C         | 1.63427100  | 1.84270300  | 2.23911200  |
| H         | 2.06013500  | 2.69788100  | 2.77943800  |
| H         | 0.58656000  | 2.07275200  | 2.02534200  |
| H         | 1.65289400  | 0.98560800  | 2.92007400  |
| C         | 3.92956900  | 1.38092500  | 1.26639000  |
| H         | 4.53014600  | 1.22916900  | 0.36336800  |
| H         | 4.32931700  | 2.26381300  | 1.78090400  |
| H         | 4.09653100  | 0.51951500  | 1.92201900  |
| C         | 2.11921600  | -1.82862500 | 1.96418400  |
| H         | 2.52052900  | -2.80477300 | 2.26514600  |
| H         | 2.56379100  | -1.07443400 | 2.61999800  |
| H         | 1.04059100  | -1.84452200 | 2.15660000  |
| C         | 1.87837600  | -2.71606700 | -0.38481300 |
| H         | 2.17319000  | -2.62177500 | -1.43366700 |
| H         | 2.26284200  | -3.67714100 | -0.01981600 |
| H         | 0.78424600  | -2.76775200 | -0.34761100 |
| <b>2a</b> |             |             |             |
| C         | -2.08529600 | 1.22919400  | -0.24423200 |

|   |             |             |             |
|---|-------------|-------------|-------------|
| C | -2.61422300 | 0.12258000  | 0.67344200  |
| C | -1.70060600 | -1.06656100 | 0.35277900  |
| H | -2.55194500 | 1.19477300  | -1.23671000 |
| H | -2.20020700 | 2.24421600  | 0.14133700  |
| H | -2.49016400 | 0.41239800  | 1.72113800  |
| H | -3.66564000 | -0.11593700 | 0.50469800  |
| H | -1.55950500 | -1.75256700 | 1.18874600  |
| H | -2.05912300 | -1.64031700 | -0.50807700 |
| N | -0.41995500 | -0.41167300 | 0.01931500  |
| C | 0.70886500  | -1.22605800 | -0.18715500 |
| O | 0.56511000  | -2.43598700 | -0.34416400 |
| C | 2.03666700  | -0.63973200 | -0.15544100 |
| H | 2.89529400  | -1.24920300 | -0.40384300 |
| C | -0.61407700 | 0.89946700  | -0.43060300 |
| O | 0.24104000  | 1.61772600  | -0.91887200 |
| N | 2.29723100  | 0.52455100  | 0.37549500  |
| N | 2.52188400  | 1.53560500  | 0.84008500  |

**3a**

|   |             |             |             |
|---|-------------|-------------|-------------|
| O | 0.26248900  | 2.70393000  | -0.46033400 |
| C | 1.38853700  | 2.05580700  | -0.09258200 |
| C | 0.16485300  | 4.06947300  | -0.02263600 |
| O | 2.28304100  | 2.62098200  | 0.52414100  |
| C | 1.43793300  | 0.65010200  | -0.52151300 |
| H | 0.95226200  | 4.67829100  | -0.47506900 |
| H | 0.24042700  | 4.13858800  | 1.06509400  |
| H | -0.81450600 | 4.41291100  | -0.35516900 |
| C | 2.79577600  | -0.04637200 | -0.70064900 |
| C | 0.45322100  | -1.61509000 | -0.98113800 |
| N | 3.10716200  | -0.90960300 | 0.46416200  |
| C | 4.06658700  | 0.78689400  | -0.87785500 |
| H | -0.07469000 | -1.77261300 | -1.92820200 |
| H | -0.05340900 | -2.22481500 | -0.22592900 |
| C | 2.64738100  | -2.16744500 | 0.22646500  |
| C | 4.33512100  | -0.54140300 | 1.17099700  |
| H | 3.87458100  | 1.79130200  | -1.25243100 |
| H | 4.68000300  | 0.24776200  | -1.60558000 |
| C | 4.74016900  | 0.79203100  | 0.50949300  |
| O | 2.80993700  | -3.16927700 | 0.90954100  |
| H | 5.08440900  | -1.32773000 | 1.02434400  |
| H | 4.16002100  | -0.43536800 | 2.24497900  |
| H | 5.82591100  | 0.89063000  | 0.43961600  |
| H | 4.34888300  | 1.62599900  | 1.09136500  |
| C | 0.33858500  | -0.14856700 | -0.62594100 |



|    |             |             |             |
|----|-------------|-------------|-------------|
| O  | -0.89591400 | 0.31902500  | -0.43929800 |
| Si | -2.37209500 | -0.35234900 | 0.10442100  |
| C  | -2.03738900 | -1.46111000 | 1.61652000  |
| H  | -1.81726100 | -2.45785200 | 1.20759000  |
| C  | -3.35867400 | 1.20632300  | 0.52819900  |
| H  | -4.34380900 | 0.86654100  | 0.87837300  |
| C  | -3.12412800 | -1.37576800 | -1.30962500 |
| H  | -2.63037200 | -2.35655400 | -1.24417800 |
| C  | -3.56892600 | 2.10311900  | -0.70437500 |
| H  | -2.61117900 | 2.38199000  | -1.15646800 |
| H  | -4.17253300 | 1.61261500  | -1.47330400 |
| H  | -4.08534100 | 3.02988200  | -0.42300600 |
| C  | -2.69256100 | 2.00384800  | 1.66330500  |
| H  | -3.24914700 | 2.92840700  | 1.86349200  |
| H  | -2.65094900 | 1.43760200  | 2.59789300  |
| H  | -1.66931200 | 2.28423700  | 1.39571200  |
| C  | -2.84150800 | -0.80627400 | -2.71000900 |
| H  | -3.35681000 | 0.14587900  | -2.86792500 |
| H  | -1.77588800 | -0.62944100 | -2.88126900 |
| H  | -3.19368200 | -1.49935500 | -3.48432500 |
| C  | -4.63443100 | -1.60014600 | -1.11099400 |
| H  | -5.03876100 | -2.23830800 | -1.90670000 |
| H  | -4.86346300 | -2.08559300 | -0.15687600 |
| H  | -5.18518400 | -0.65327100 | -1.14266800 |
| C  | -3.29205200 | -1.60069000 | 2.50044300  |
| H  | -3.10726800 | -2.30762800 | 3.31882300  |
| H  | -3.57230500 | -0.64449700 | 2.95495900  |
| H  | -4.15886400 | -1.96817100 | 1.94202700  |
| C  | -0.82716500 | -1.02776000 | 2.46306700  |
| H  | 0.10126600  | -0.98848200 | 1.88599000  |
| H  | -0.97700900 | -0.03788600 | 2.90513200  |
| H  | -0.66867500 | -1.73334400 | 3.28809900  |
| C  | 1.91411600  | -2.05248600 | -1.12853400 |
| H  | 2.01284400  | -2.97248200 | -1.70488700 |
| O  | 2.64248800  | -0.99791900 | -1.76984500 |

**1**

|    |             |             |             |
|----|-------------|-------------|-------------|
| Cu | -0.27687100 | 0.21906000  | 0.31450200  |
| N  | 0.82604300  | -0.07179600 | 1.85836200  |
| N  | -1.12478300 | 1.84472000  | -0.34620500 |
| N  | -0.70472500 | -1.33518800 | -0.84194600 |
| C  | 1.60416500  | -0.31704200 | 2.67916800  |
| C  | -2.07504500 | 2.45749200  | -0.59942400 |
| C  | -1.53564600 | -2.07292500 | -1.17174700 |

|   |             |             |             |
|---|-------------|-------------|-------------|
| C | -3.31028500 | 3.16117900  | -0.88122600 |
| H | -3.57065300 | 3.04311100  | -1.93677800 |
| H | -4.09280400 | 2.71452700  | -0.26071600 |
| H | -3.20660400 | 4.22387100  | -0.64629600 |
| C | 2.62497800  | -0.63624800 | 3.65719100  |
| H | 2.38524200  | -1.58522100 | 4.14536700  |
| H | 3.58348000  | -0.72491900 | 3.13669800  |
| H | 2.68362900  | 0.15431100  | 4.41073600  |
| C | -2.61842900 | -2.96816100 | -1.52826400 |
| H | -2.97775100 | -2.73434300 | -2.53413900 |
| H | -2.27848300 | -4.00665600 | -1.49360200 |
| H | -3.42862100 | -2.81482700 | -0.80889900 |
| B | -3.81392700 | -0.22727700 | 0.62894100  |
| F | -2.58210200 | -0.25603800 | 1.34427000  |
| F | -3.56229100 | -0.04811900 | -0.74355600 |
| F | -4.47835600 | -1.44794200 | 0.82365500  |
| F | -4.58836700 | 0.84285800  | 1.10192600  |
| C | 3.49929800  | 1.93935200  | 0.60908400  |
| C | 2.38577800  | 2.69593400  | -0.12162000 |
| C | 2.22528700  | 1.91635400  | -1.43189400 |
| H | 4.49554600  | 2.30847000  | 0.33501300  |
| H | 3.42689900  | 1.95478900  | 1.69862600  |
| H | 1.45832300  | 2.64129200  | 0.45501200  |
| H | 2.62110800  | 3.74626000  | -0.30206900 |
| H | 1.21147600  | 1.93928000  | -1.83125100 |
| H | 2.91516500  | 2.26476700  | -2.20719600 |
| N | 2.57721600  | 0.53598400  | -1.03872500 |
| C | 2.39528300  | -0.48786400 | -1.98746200 |
| O | 2.15285100  | -0.18745700 | -3.15406100 |
| C | 2.46685400  | -1.88231000 | -1.58952100 |
| H | 2.45228000  | -2.64677900 | -2.35550300 |
| C | 3.39270600  | 0.51518200  | 0.09526000  |
| O | 3.93946300  | -0.47165900 | 0.56265200  |
| N | 2.25762100  | -2.30255700 | -0.37161400 |
| N | 2.06184500  | -2.69457100 | 0.67542500  |

**TS1**

|    |             |             |             |
|----|-------------|-------------|-------------|
| Cu | -0.32840000 | 0.88717700  | 0.68040900  |
| N  | 0.55283600  | 0.07832400  | 2.31374600  |
| N  | -0.16428500 | -0.83612100 | -0.53517700 |
| N  | 1.21737300  | 1.93858400  | -0.04470900 |
| C  | 1.33806500  | -0.51381200 | 2.92445200  |
| C  | 0.31200600  | -1.64703800 | -1.21096700 |
| C  | 2.22033700  | 2.26248200  | -0.52305200 |

|   |             |             |             |
|---|-------------|-------------|-------------|
| C | 0.91986600  | -2.66171000 | -2.05282200 |
| H | 0.92590800  | -2.31651900 | -3.09047000 |
| H | 1.95018800  | -2.82618800 | -1.72638100 |
| H | 0.34822300  | -3.59138200 | -1.98481900 |
| C | 2.35421300  | -1.26451700 | 3.63788900  |
| H | 3.15332000  | -1.49843300 | 2.92943200  |
| H | 2.75311100  | -0.66744700 | 4.46251400  |
| H | 1.92716900  | -2.19006300 | 4.03367200  |
| C | 3.49031800  | 2.63683200  | -1.11608300 |
| H | 3.35925200  | 2.79327700  | -2.19060800 |
| H | 3.85662600  | 3.55974200  | -0.65810900 |
| H | 4.20541500  | 1.82518500  | -0.95487500 |
| B | 3.77233000  | -0.95568100 | -0.64231800 |
| F | 3.19593500  | -0.89954900 | 0.64345800  |
| F | 2.89622000  | -0.37339700 | -1.58116100 |
| F | 4.98524600  | -0.24267300 | -0.64358300 |
| F | 3.99775200  | -2.29885000 | -0.99486100 |
| C | -3.98660800 | -2.35905200 | 0.61928500  |
| C | -3.90514900 | -2.59180700 | -0.89964900 |
| C | -3.93786200 | -1.17564700 | -1.50653700 |
| H | -5.02438900 | -2.31471600 | 0.97255800  |
| H | -3.45734900 | -3.09801300 | 1.22369100  |
| H | -2.95474400 | -3.07274800 | -1.14765200 |
| H | -4.71483300 | -3.21521100 | -1.28159200 |
| H | -3.32307400 | -1.06893700 | -2.40056300 |
| H | -4.95445100 | -0.84197200 | -1.73774900 |
| N | -3.38352900 | -0.35224800 | -0.42189900 |
| C | -2.88546200 | 0.93107200  | -0.63263000 |
| O | -2.95252300 | 1.44453600  | -1.74498900 |
| C | -2.16171600 | 1.50606400  | 0.53947200  |
| H | -2.76637200 | 1.87146800  | 1.36674200  |
| C | -3.38113300 | -0.98539900 | 0.80410800  |
| O | -2.95772500 | -0.45753700 | 1.82648700  |
| N | -1.35530100 | 4.13857600  | -0.46167400 |
| N | -1.90676800 | 3.22026700  | -0.17936100 |

2

|    |             |             |             |
|----|-------------|-------------|-------------|
| Cu | 0.36418600  | 1.01082100  | -0.33645700 |
| N  | -0.95391200 | 1.53188500  | -1.74595900 |
| N  | 0.52681800  | -1.10351300 | -0.78507200 |
| N  | -0.68710400 | 0.99956500  | 1.33884600  |
| C  | -1.96699000 | 1.52357600  | -2.30754500 |
| C  | 0.07337800  | -2.17035500 | -0.82269100 |
| C  | -1.44019600 | 0.77589800  | 2.18851700  |

|   |             |             |             |
|---|-------------|-------------|-------------|
| C | -0.49017300 | -3.50767900 | -0.87285700 |
| H | -0.18840800 | -4.06321600 | 0.01962100  |
| H | -1.58106400 | -3.43965600 | -0.89420700 |
| H | -0.12707700 | -4.02855600 | -1.76319800 |
| C | -3.26137900 | 1.46398300  | -2.96027600 |
| H | -3.84507900 | 0.68090400  | -2.46842100 |
| H | -3.77582800 | 2.42380100  | -2.86037300 |
| H | -3.14052300 | 1.22559100  | -4.02056100 |
| C | -2.40900800 | 0.47365500  | 3.22557200  |
| H | -1.95529200 | -0.18603100 | 3.97071300  |
| H | -2.73394000 | 1.39725000  | 3.71263200  |
| H | -3.26369100 | -0.03198700 | 2.76753600  |
| B | -3.27375200 | -1.62248300 | 0.35933700  |
| F | -3.05282700 | -0.59754000 | -0.58242900 |
| F | -2.10127100 | -1.83390900 | 1.11342300  |
| F | -4.31945100 | -1.25118500 | 1.22379600  |
| F | -3.60606600 | -2.81170900 | -0.31706000 |
| C | 4.01918900  | -1.68552900 | -1.17959200 |
| C | 3.98690700  | -2.48712100 | 0.15716600  |
| C | 3.84255200  | -1.43544800 | 1.29405900  |
| H | 5.03854800  | -1.51050200 | -1.54279700 |
| H | 3.44711600  | -2.15062500 | -1.98485100 |
| H | 3.11480100  | -3.14421000 | 0.16119100  |
| H | 4.87935400  | -3.09920200 | 0.28798600  |
| H | 3.13628600  | -1.73360000 | 2.06980500  |
| H | 4.79588600  | -1.17157000 | 1.75943100  |
| N | 3.32285300  | -0.27788600 | 0.56171400  |
| C | 2.78850900  | 1.02448000  | 0.90458800  |
| O | 2.71543700  | 1.44678700  | 2.05218900  |
| C | 2.37579800  | 1.52876800  | -0.38910100 |
| H | 2.52083300  | 2.56461300  | -0.67327600 |
| C | 3.42238600  | -0.39698700 | -0.74546800 |
| O | 2.98452700  | 0.63663700  | -1.39012400 |
| N | -0.15428000 | 4.18828600  | 0.16216500  |
| N | -1.20345500 | 4.11935500  | 0.50102200  |

### 3

|    |            |             |             |
|----|------------|-------------|-------------|
| Cu | 2.18284000 | -0.72219400 | 0.56513900  |
| N  | 2.45511000 | -2.22632800 | -0.75351100 |
| N  | 2.98463300 | 0.85500400  | -0.67756500 |
| N  | 3.59622300 | -0.97518800 | 1.89937100  |
| C  | 3.05233600 | -2.89004100 | -1.49185300 |
| C  | 3.85259600 | 1.43929900  | -1.17727900 |
| C  | 4.61819400 | -1.05453800 | 2.43797800  |

|   |             |             |             |
|---|-------------|-------------|-------------|
| C | 4.93903600  | 2.16947500  | -1.80575800 |
| H | 5.28141000  | 2.96175900  | -1.13415600 |
| H | 5.76923000  | 1.48467100  | -1.99726500 |
| H | 4.59270400  | 2.61431800  | -2.74276500 |
| C | 3.85698100  | -3.68733600 | -2.39889400 |
| H | 4.88694300  | -3.32588700 | -2.33494000 |
| H | 3.81742000  | -4.74084100 | -2.10854800 |
| H | 3.48957300  | -3.57956800 | -3.42314200 |
| C | 5.91844500  | -1.15701700 | 3.07360500  |
| H | 6.16588300  | -0.20747100 | 3.55684800  |
| H | 5.90384500  | -1.95081400 | 3.82573800  |
| H | 6.66645700  | -1.37748100 | 2.30686700  |
| B | 6.64697800  | -0.67962700 | -0.47620800 |
| F | 5.62417800  | -1.55354400 | -0.89747500 |
| F | 6.09804400  | 0.33887500  | 0.33013500  |
| F | 7.60031300  | -1.39596000 | 0.26967500  |
| F | 7.25503600  | -0.09571200 | -1.60406800 |
| C | 0.12304300  | 2.86608100  | -1.52997200 |
| C | 0.79496100  | 4.04726000  | -0.76345400 |
| C | 0.74160600  | 3.68423000  | 0.74967100  |
| H | -0.91126900 | 3.08415200  | -1.81545400 |
| H | 0.66418600  | 2.56248900  | -2.42859200 |
| H | 1.83657300  | 4.13512100  | -1.07806700 |
| H | 0.29590300  | 4.99513400  | -0.96493000 |
| H | 1.68032600  | 3.87809500  | 1.27028700  |
| H | -0.07836300 | 4.16944900  | 1.28299900  |
| N | 0.48732200  | 2.24291200  | 0.70204600  |
| C | 0.45737100  | 1.15629500  | 1.65693600  |
| O | 0.61754000  | 1.30805900  | 2.86157400  |
| C | 0.27110900  | 0.00047700  | 0.80213400  |
| H | -0.41771800 | -0.78511200 | 1.08319700  |
| C | 0.14598900  | 1.80499900  | -0.49137400 |
| O | -0.09000300 | 0.53377900  | -0.52543500 |
| C | -2.93539100 | 0.56706200  | 1.85304400  |
| H | -2.50378400 | 1.39419700  | 2.39622800  |
| H | -3.02282300 | -0.39323800 | 2.34563900  |
| C | -3.35387400 | 0.73064400  | 0.58867100  |
| C | -3.28293700 | 2.00703200  | -0.14846300 |
| N | -3.65715600 | 1.97101100  | -1.41052000 |
| N | -3.97787600 | 1.92676000  | -2.49840300 |
| C | -2.86650500 | 3.30737400  | 0.37340800  |
| O | -2.49053200 | 3.51079500  | 1.51591000  |
| O | -2.93914200 | 4.26639100  | -0.57676100 |
| C | -2.60793200 | 5.60152800  | -0.14591300 |

|    |             |             |             |
|----|-------------|-------------|-------------|
| H  | -2.69945300 | 6.22233500  | -1.03659400 |
| H  | -3.30677600 | 5.93649200  | 0.62425200  |
| H  | -1.58926800 | 5.64273700  | 0.24332800  |
| O  | -3.90946100 | -0.22161200 | -0.20214200 |
| Si | -4.23083900 | -1.88439400 | 0.02798800  |
| C  | -5.29474100 | -2.14069400 | 1.58579800  |
| H  | -4.57392600 | -2.28393600 | 2.40457800  |
| C  | -5.17663900 | -2.27889000 | -1.56795100 |
| H  | -5.43495400 | -3.34682700 | -1.52433900 |
| C  | -2.55979200 | -2.75490200 | 0.25950400  |
| H  | -2.15505700 | -2.28124600 | 1.16691900  |
| C  | -1.55248300 | -2.51168200 | -0.87801100 |
| H  | -1.52605700 | -1.46670200 | -1.19831300 |
| H  | -0.53852300 | -2.78753700 | -0.56352800 |
| H  | -1.79517600 | -3.12208600 | -1.75359700 |
| C  | -2.69710700 | -4.25918300 | 0.55193100  |
| H  | -3.17813800 | -4.78886200 | -0.27928300 |
| H  | -1.70879500 | -4.71440400 | 0.69670800  |
| H  | -3.28150200 | -4.45440000 | 1.45616900  |
| C  | -6.17760600 | -0.93528000 | 1.95480800  |
| H  | -6.72757600 | -1.13585500 | 2.88347200  |
| H  | -5.58760200 | -0.02778000 | 2.10825700  |
| H  | -6.92023300 | -0.72326900 | 1.17901200  |
| C  | -6.14465200 | -3.42319400 | 1.49046200  |
| H  | -5.54759600 | -4.31001300 | 1.25589200  |
| H  | -6.65733700 | -3.61564200 | 2.44140800  |
| H  | -6.91698700 | -3.33346500 | 0.71893500  |
| C  | -6.48677200 | -1.47134700 | -1.63904900 |
| H  | -7.02380100 | -1.69154100 | -2.57055400 |
| H  | -7.16266500 | -1.69601100 | -0.80988300 |
| H  | -6.28490000 | -0.39436300 | -1.62370900 |
| C  | -4.35033500 | -2.03472900 | -2.84327900 |
| H  | -3.48393800 | -2.69629300 | -2.91273900 |
| H  | -4.96671700 | -2.20448900 | -3.73557400 |
| H  | -3.98757300 | -1.00151500 | -2.89029100 |

## TS2

|    |             |             |             |
|----|-------------|-------------|-------------|
| Cu | -2.91744500 | 0.27787200  | -0.58896100 |
| N  | -2.81812300 | -1.62859200 | -0.98562200 |
| N  | -2.81982500 | 0.77403000  | 1.30150600  |
| N  | -4.23258600 | 1.28164600  | -1.62292100 |
| C  | -3.37158300 | -2.64386300 | -0.89752400 |
| C  | -3.43383300 | 0.74144500  | 2.28562100  |
| C  | -5.37309700 | 1.39197100  | -1.80506500 |

|   |             |             |             |
|---|-------------|-------------|-------------|
| C | -4.24462700 | 0.68858800  | 3.48458500  |
| H | -5.29041700 | 0.77220700  | 3.17734600  |
| H | -4.09149100 | -0.26731300 | 3.99250200  |
| H | -3.98296900 | 1.50988400  | 4.15698700  |
| C | -4.11965300 | -3.87824200 | -0.77204400 |
| H | -3.88763400 | -4.35729600 | 0.18300600  |
| H | -5.18203100 | -3.62217600 | -0.80299900 |
| H | -3.87330200 | -4.55704200 | -1.59279000 |
| C | -6.80623900 | 1.46943600  | -2.00261700 |
| H | -7.03205300 | 1.75002300  | -3.03480700 |
| H | -7.22029000 | 0.48203100  | -1.78136900 |
| H | -7.23610000 | 2.20552600  | -1.31821700 |
| B | -6.21555800 | -1.06414700 | 0.79462600  |
| F | -6.20789800 | -1.39197600 | -0.58362000 |
| F | -6.15149500 | 0.34203500  | 0.93051600  |
| F | -7.38524500 | -1.54409800 | 1.38766500  |
| F | -5.08811200 | -1.64350600 | 1.41335000  |
| C | 0.50220500  | 0.80429100  | 1.75649200  |
| C | 0.23213500  | 2.33836200  | 1.85055600  |
| C | -0.29550200 | 2.79593700  | 0.45810100  |
| H | 1.42578200  | 0.50502900  | 2.25653900  |
| H | -0.32033000 | 0.21710000  | 2.17716000  |
| H | -0.48865300 | 2.56765000  | 2.63646500  |
| H | 1.15815100  | 2.86702800  | 2.08423400  |
| H | -1.37717300 | 2.95176400  | 0.45312200  |
| H | 0.19260100  | 3.70116600  | 0.09261300  |
| N | 0.02126000  | 1.65517600  | -0.39168700 |
| C | -0.21983400 | 1.30651200  | -1.72902500 |
| O | -0.67231000 | 2.04051800  | -2.61398600 |
| C | 0.28765100  | -0.05532500 | -1.74685700 |
| H | 0.08775800  | -0.81295600 | -2.48900400 |
| C | 0.56765400  | 0.60848600  | 0.28161500  |
| O | 0.39479100  | -0.50648800 | -0.44079400 |
| C | 2.43736800  | 0.49351500  | -1.79236100 |
| H | 2.40858800  | 1.37268400  | -2.42013700 |
| H | 2.67274400  | -0.44048200 | -2.28543900 |
| C | 2.76399200  | 0.64620800  | -0.44597800 |
| C | 3.17257300  | 1.94157000  | 0.14733500  |
| N | 3.74099600  | 1.89952300  | 1.32834400  |
| N | 4.24622400  | 1.85638700  | 2.35085800  |
| C | 2.95303500  | 3.26984500  | -0.42054000 |
| O | 2.45848100  | 3.48451000  | -1.51537200 |
| O | 3.36161100  | 4.24540900  | 0.42242400  |
| C | 3.20520800  | 5.59123500  | -0.06426800 |

|    |            |             |             |
|----|------------|-------------|-------------|
| H  | 3.59178500 | 6.23240400  | 0.72770600  |
| H  | 3.77719400 | 5.73726400  | -0.98378000 |
| H  | 2.15227800 | 5.81493400  | -0.25233500 |
| O  | 3.20839400 | -0.39528400 | 0.34143100  |
| Si | 3.96990800 | -1.86385100 | -0.04511300 |
| C  | 5.33071100 | -1.56562700 | -1.34903700 |
| H  | 4.82299800 | -1.64606500 | -2.32145600 |
| C  | 4.66714900 | -2.38127400 | 1.64532000  |
| H  | 5.02519900 | -3.41573400 | 1.53173600  |
| C  | 2.66972600 | -3.05398600 | -0.76897200 |
| H  | 2.17947000 | -2.45633800 | -1.55045000 |
| C  | 1.57704200 | -3.49115100 | 0.22001700  |
| H  | 1.14816500 | -2.64614200 | 0.76324500  |
| H  | 0.75821400 | -3.99367300 | -0.31184600 |
| H  | 1.97117500 | -4.20516200 | 0.95125300  |
| C  | 3.28897100 | -4.28466800 | -1.45500800 |
| H  | 3.86228000 | -4.89629600 | -0.74770800 |
| H  | 2.50316500 | -4.92800500 | -1.87196800 |
| H  | 3.95627600 | -4.00981400 | -2.27717600 |
| C  | 5.96413100 | -0.16521100 | -1.27270200 |
| H  | 6.74450000 | -0.05508000 | -2.03717500 |
| H  | 5.22840500 | 0.62595700  | -1.43802700 |
| H  | 6.43454000 | 0.01543300  | -0.30097200 |
| C  | 6.42065300 | -2.65516900 | -1.31472500 |
| H  | 6.00950800 | -3.66690100 | -1.37402900 |
| H  | 7.11199600 | -2.53282600 | -2.15841600 |
| H  | 7.01824900 | -2.59789200 | -0.39946200 |
| C  | 5.86011400 | -1.50632200 | 2.07602200  |
| H  | 6.24064100 | -1.83273500 | 3.05261300  |
| H  | 6.69320200 | -1.54507800 | 1.37066700  |
| H  | 5.56179100 | -0.45731100 | 2.18034200  |
| C  | 3.60586200 | -2.35474200 | 2.76139900  |
| H  | 2.77366400 | -3.03629000 | 2.57513000  |
| H  | 4.05532000 | -2.63588600 | 3.72269700  |
| H  | 3.19232000 | -1.34675700 | 2.87628800  |

**TS2'**

|    |             |             |             |
|----|-------------|-------------|-------------|
| Cu | -2.20591200 | -0.37078200 | -0.25931500 |
| N  | -2.71962600 | -0.44435500 | 1.69358800  |
| N  | -3.23098900 | 1.23321300  | -0.94849300 |
| N  | -3.15618200 | -1.93321500 | -1.10583500 |
| C  | -3.46083500 | -0.49910200 | 2.58172400  |
| C  | -4.21531400 | 1.81753800  | -1.12625400 |
| C  | -4.10452300 | -2.56751100 | -1.30569100 |



|   |             |             |             |
|---|-------------|-------------|-------------|
| C | -5.45827200 | 2.53885100  | -1.31728800 |
| H | -6.01561100 | 2.09234600  | -2.14423700 |
| H | -6.04335600 | 2.44466500  | -0.39969500 |
| H | -5.25508700 | 3.59106000  | -1.53340000 |
| C | -4.41157100 | -0.55282500 | 3.67539300  |
| H | -5.25263100 | 0.09549400  | 3.42009400  |
| H | -4.77289000 | -1.57725500 | 3.79392800  |
| H | -3.93974600 | -0.21779700 | 4.60279600  |
| C | -5.30747100 | -3.34694600 | -1.52242100 |
| H | -5.04974800 | -4.36368500 | -1.83012100 |
| H | -5.86767000 | -3.36467100 | -0.58470200 |
| H | -5.91667500 | -2.86971800 | -2.29375000 |
| B | -6.38590800 | -0.49873800 | 0.54464600  |
| F | -5.77433100 | -1.63826400 | 1.11301000  |
| F | -6.07627800 | -0.44220100 | -0.83025200 |
| F | -7.77055600 | -0.56539900 | 0.71935400  |
| F | -5.87987500 | 0.66159100  | 1.18065800  |
| C | -0.15307700 | 2.81128200  | 0.76832600  |
| C | -0.71299500 | 3.60805800  | -0.43937600 |
| C | -0.28280000 | 2.84954200  | -1.72217900 |
| H | 0.43824500  | 3.43054100  | 1.44602400  |
| H | -0.95498300 | 2.35326700  | 1.35079600  |
| H | -1.80137500 | 3.66299000  | -0.37950000 |
| H | -0.31885800 | 4.62438500  | -0.45063700 |
| H | -1.12815000 | 2.54411600  | -2.34357900 |
| H | 0.40427100  | 3.44254800  | -2.32697300 |
| N | 0.37120100  | 1.63292700  | -1.23602300 |
| C | 0.02558300  | 0.32922900  | -1.63889900 |
| O | -0.20491700 | -0.00128700 | -2.80614400 |
| C | -0.10510700 | -0.41294100 | -0.40346800 |
| H | 0.09735400  | -1.47015600 | -0.28721700 |
| C | 0.66418800  | 1.66108600  | 0.16014300  |
| O | 0.30630500  | 0.38027800  | 0.67715000  |
| C | 3.74341600  | 1.13579400  | -1.57998500 |
| H | 3.76126700  | 2.15470500  | -1.94291400 |
| H | 4.25664900  | 0.38829400  | -2.17301700 |
| C | 3.06403700  | 0.79476600  | -0.47530700 |
| C | 2.25583800  | 1.81933200  | 0.30164300  |
| N | 2.57622400  | 1.49626800  | 1.85757900  |
| N | 2.11819400  | 0.61046100  | 2.42180100  |
| C | 2.74520100  | 3.23602400  | 0.03636200  |
| O | 2.20162800  | 4.01713000  | -0.71689800 |
| O | 3.85793400  | 3.49291500  | 0.72278900  |
| C | 4.43982300  | 4.79976100  | 0.50685000  |

|    |            |             |             |
|----|------------|-------------|-------------|
| H  | 5.31414500 | 4.83410200  | 1.15491400  |
| H  | 4.73137600 | 4.91125000  | -0.53980600 |
| H  | 3.72705000 | 5.58094900  | 0.77811800  |
| O  | 2.96310600 | -0.44580100 | 0.03281400  |
| Si | 4.06358200 | -1.75941700 | -0.08850900 |
| C  | 5.81868200 | -1.07131800 | 0.14261600  |
| H  | 6.06886400 | -0.59177200 | -0.81422400 |
| C  | 3.48423900 | -2.93046800 | 1.28074500  |
| H  | 3.99125700 | -3.88389500 | 1.07407700  |
| C  | 3.89000500 | -2.54096000 | -1.81648600 |
| H  | 4.66635600 | -2.06081700 | -2.43127300 |
| C  | 2.53009400 | -2.25913400 | -2.47902500 |
| H  | 2.33025800 | -1.19074700 | -2.58479700 |
| H  | 2.49349900 | -2.70393900 | -3.48180600 |
| H  | 1.70390500 | -2.68985700 | -1.90367800 |
| C  | 4.18194200 | -4.05280100 | -1.79726900 |
| H  | 3.41919300 | -4.59556900 | -1.22817300 |
| H  | 4.17890100 | -4.45959400 | -2.81629200 |
| H  | 5.15523500 | -4.28868700 | -1.35366500 |
| C  | 5.94711200 | 0.00052600  | 1.23838800  |
| H  | 6.98471600 | 0.35268800  | 1.30457600  |
| H  | 5.32151200 | 0.87401100  | 1.03431300  |
| H  | 5.67108500 | -0.38358900 | 2.22438200  |
| C  | 6.82787700 | -2.21594000 | 0.35669000  |
| H  | 6.81487500 | -2.93716400 | -0.46744400 |
| H  | 7.84923500 | -1.82136100 | 0.42844400  |
| H  | 6.62682000 | -2.76647500 | 1.28243100  |
| C  | 3.87723900 | -2.48944500 | 2.70066600  |
| H  | 3.49118100 | -3.20199700 | 3.44111000  |
| H  | 4.96154600 | -2.43539300 | 2.83232500  |
| H  | 3.45935100 | -1.50814700 | 2.94747900  |
| C  | 1.96537900 | -3.17329800 | 1.20058200  |
| H  | 1.65124500 | -3.54192300 | 0.21891100  |
| H  | 1.65422500 | -3.91544600 | 1.94673900  |
| H  | 1.41704000 | -2.24864700 | 1.40566900  |

4

|    |             |             |             |
|----|-------------|-------------|-------------|
| Cu | -2.06198700 | -0.02391100 | -0.01819800 |
| N  | -2.65654200 | 0.83614200  | -1.66944900 |
| N  | -2.76114400 | -1.87493200 | 0.06946100  |
| N  | -2.65111600 | 1.03843700  | 1.55298400  |
| C  | -3.49944700 | 1.22801400  | -2.36174100 |
| C  | -3.69666000 | -2.55158400 | 0.17615900  |
| C  | -3.53403000 | 1.52647900  | 2.12482500  |

|   |             |             |             |
|---|-------------|-------------|-------------|
| C | -4.89780300 | -3.34800900 | 0.32798100  |
| H | -5.61466600 | -2.75536200 | 0.90222400  |
| H | -5.32095700 | -3.57139500 | -0.65483300 |
| H | -4.67209800 | -4.27998900 | 0.85304000  |
| C | -4.59421800 | 1.71238000  | -3.17903000 |
| H | -5.00107700 | 0.88995300  | -3.77334500 |
| H | -5.36866100 | 2.08740100  | -2.50541200 |
| H | -4.25105300 | 2.51061400  | -3.84241000 |
| C | -4.66680500 | 2.13450300  | 2.79447200  |
| H | -4.34789100 | 3.02011200  | 3.35052600  |
| H | -5.39467600 | 2.41081400  | 2.02756200  |
| H | -5.12077300 | 1.41344300  | 3.47891800  |
| B | -6.08427500 | 0.19240800  | -0.07216300 |
| F | -5.61327300 | 1.52450700  | -0.18356800 |
| F | -5.62345400 | -0.35419200 | 1.14741400  |
| F | -7.48151600 | 0.18352900  | -0.09694600 |
| F | -5.57917000 | -0.56852900 | -1.14556700 |
| C | 0.71826400  | -0.97449300 | -1.89851400 |
| C | 0.83040700  | -2.46488500 | -2.30056000 |
| C | 0.32636500  | -3.25571800 | -1.07465900 |
| H | 1.42900700  | -0.33108200 | -2.41786000 |
| H | -0.29160200 | -0.59684500 | -2.08448700 |
| H | 0.25206700  | -2.69473900 | -3.19768600 |
| H | 1.87563500  | -2.71995400 | -2.49907800 |
| H | -0.75440100 | -3.43208000 | -1.11508900 |
| H | 0.83563700  | -4.21495400 | -0.95268400 |
| N | 0.63698800  | -2.34968500 | 0.02557700  |
| C | 0.21621900  | -2.30846300 | 1.32167900  |
| O | -0.23408500 | -3.20554300 | 2.01314500  |
| C | 0.45454100  | -0.81904800 | 1.67912000  |
| H | -0.14487900 | -0.43809800 | 2.50131100  |
| C | 0.95145500  | -0.99201700 | -0.40348000 |
| O | 0.07610600  | -0.18698500 | 0.41874000  |
| C | 1.97184800  | -0.54376700 | 1.71818700  |
| H | 2.51052200  | -1.29317600 | 2.29351500  |
| H | 2.16730500  | 0.44024400  | 2.13916200  |
| C | 2.33543400  | -0.56872500 | 0.19746700  |
| C | 3.43978100  | -1.55208600 | -0.17511900 |
| N | 4.13817400  | -1.23104000 | -1.23578400 |
| N | 4.74098000  | -0.91896100 | -2.14698400 |
| C | 3.72608200  | -2.84820200 | 0.43372500  |
| O | 3.21576400  | -3.27161300 | 1.45839100  |
| O | 4.64933000  | -3.53172600 | -0.27821400 |
| C | 5.03397500  | -4.80745800 | 0.26823900  |

|    |             |             |             |
|----|-------------|-------------|-------------|
| H  | 5.77824600  | -5.20546100 | -0.42123900 |
| H  | 5.46599200  | -4.68549100 | 1.26448300  |
| H  | 4.17241700  | -5.47716600 | 0.32496000  |
| O  | 2.68549000  | 0.66429000  | -0.37020300 |
| Si | 2.80755300  | 2.27478300  | 0.13626900  |
| C  | 3.98818000  | 2.39940300  | 1.63148800  |
| H  | 3.35497600  | 2.23691500  | 2.51688400  |
| C  | 3.51004200  | 3.09646200  | -1.42829500 |
| H  | 3.42494400  | 4.18222100  | -1.27027200 |
| C  | 1.08601800  | 2.90770800  | 0.64985300  |
| H  | 0.73738900  | 2.16209600  | 1.37712500  |
| C  | 0.05513000  | 2.93711300  | -0.48983300 |
| H  | 0.04720200  | 2.01011400  | -1.06662500 |
| H  | -0.95573700 | 3.08059200  | -0.08858900 |
| H  | 0.25310100  | 3.76630700  | -1.17799200 |
| C  | 1.12362000  | 4.26812400  | 1.36705700  |
| H  | 1.53734400  | 5.05522700  | 0.72501900  |
| H  | 0.10882300  | 4.58179300  | 1.64554700  |
| H  | 1.71787200  | 4.23784600  | 2.28491000  |
| C  | 5.07995800  | 1.31509300  | 1.63692300  |
| H  | 5.72195300  | 1.41815100  | 2.52140900  |
| H  | 4.66324000  | 0.30421400  | 1.65163300  |
| H  | 5.72559100  | 1.38783500  | 0.75614200  |
| C  | 4.61656900  | 3.79880900  | 1.78344300  |
| H  | 3.86973100  | 4.59738300  | 1.79718100  |
| H  | 5.18380400  | 3.86442100  | 2.72066000  |
| H  | 5.31441100  | 4.01790400  | 0.96966100  |
| C  | 4.99522900  | 2.76052000  | -1.66220000 |
| H  | 5.35776800  | 3.24707200  | -2.57708100 |
| H  | 5.64102700  | 3.08402700  | -0.84269700 |
| H  | 5.13899800  | 1.68236800  | -1.79209000 |
| C  | 2.71446100  | 2.73008500  | -2.69561500 |
| H  | 1.65979500  | 3.00523300  | -2.63178200 |
| H  | 3.13714600  | 3.23724200  | -3.57261500 |
| H  | 2.76658000  | 1.65230400  | -2.88415000 |

### TS3

|    |             |             |             |
|----|-------------|-------------|-------------|
| Cu | -1.97243800 | 0.03817700  | 0.11322100  |
| N  | -2.56415300 | -0.76738300 | 1.78041400  |
| N  | -2.75100100 | 1.83604400  | -0.15914300 |
| N  | -2.43944300 | -1.14638300 | -1.43897000 |
| C  | -3.40188100 | -1.17499900 | 2.46974500  |
| C  | -3.71787200 | 2.45425600  | -0.32476300 |
| C  | -3.28937300 | -1.70253000 | -1.99882300 |

|   |             |             |             |
|---|-------------|-------------|-------------|
| C | -4.95508400 | 3.17529000  | -0.54580500 |
| H | -5.62482500 | 2.51595600  | -1.10389400 |
| H | -5.41409400 | 3.42517000  | 0.41434700  |
| H | -4.76574500 | 4.09024300  | -1.11345700 |
| C | -4.48689800 | -1.68360800 | 3.28494700  |
| H | -4.98103500 | -0.85331500 | 3.79630300  |
| H | -5.20230800 | -2.17150200 | 2.61827600  |
| H | -4.10892600 | -2.39715500 | 4.02181200  |
| C | -4.38009400 | -2.39489100 | -2.65649700 |
| H | -4.00683800 | -3.27745100 | -3.18264000 |
| H | -5.09852200 | -2.68767900 | -1.88687800 |
| H | -4.86821500 | -1.72136000 | -3.36528300 |
| B | -5.95995200 | -0.40185500 | 0.06464900  |
| F | -5.42321600 | -1.69863200 | 0.26031000  |
| F | -5.49301100 | 0.10207200  | -1.17127300 |
| F | -7.35571300 | -0.46689200 | 0.05274900  |
| F | -5.52788100 | 0.44178500  | 1.10760200  |
| C | 0.86735700  | 1.10024300  | 1.81116600  |
| C | 0.88924100  | 2.60630500  | 2.16137600  |
| C | 0.33863700  | 3.32067200  | 0.91227700  |
| H | 1.62458200  | 0.51827200  | 2.33613100  |
| H | -0.11099100 | 0.66259800  | 2.03249700  |
| H | 0.29639600  | 2.83072300  | 3.05025400  |
| H | 1.91540600  | 2.93462300  | 2.34258800  |
| H | -0.75248000 | 3.41414900  | 0.93861300  |
| H | 0.77574500  | 4.31004200  | 0.76479100  |
| N | 0.72089900  | 2.40568300  | -0.16578300 |
| C | 0.22725000  | 2.29089700  | -1.43872700 |
| O | -0.26654100 | 3.15101200  | -2.14374600 |
| C | 0.45332200  | 0.78702300  | -1.73144700 |
| H | -0.18355700 | 0.36402000  | -2.50385200 |
| C | 1.06015800  | 1.07035500  | 0.31025200  |
| O | 0.14845100  | 0.22366000  | -0.42886400 |
| C | 1.96386200  | 0.50778200  | -1.85250000 |
| H | 2.46721500  | 1.21609600  | -2.50933200 |
| H | 2.15145400  | -0.50178200 | -2.21243100 |
| C | 2.42763600  | 0.60186800  | -0.33558400 |
| C | 3.57916000  | 1.52009500  | -0.32793100 |
| N | 4.05069600  | 1.43665200  | 1.68794500  |
| N | 4.81663500  | 1.18589100  | 2.44764900  |
| C | 3.44055500  | 2.92693700  | -0.63116000 |
| O | 3.37700700  | 3.26336000  | -1.81273600 |
| O | 3.54756200  | 3.78581400  | 0.39676200  |
| C | 3.59363700  | 5.18145000  | 0.02800700  |

|    |             |             |             |
|----|-------------|-------------|-------------|
| H  | 3.62622700  | 5.72633500  | 0.97093100  |
| H  | 4.48818500  | 5.39163600  | -0.56312400 |
| H  | 2.70480600  | 5.45859600  | -0.54227500 |
| O  | 2.77077600  | -0.60970200 | 0.27588500  |
| Si | 2.84311500  | -2.25185800 | -0.11730400 |
| C  | 3.93741200  | -2.52737100 | -1.65684900 |
| H  | 3.25515100  | -2.41477100 | -2.51369900 |
| C  | 3.61675600  | -2.96380100 | 1.46726400  |
| H  | 3.54286500  | -4.05889200 | 1.39043000  |
| C  | 1.08898400  | -2.88687700 | -0.51121100 |
| H  | 0.70507400  | -2.15978400 | -1.23963800 |
| C  | 0.12693300  | -2.87143600 | 0.68674500  |
| H  | 0.13908200  | -1.91570900 | 1.21490400  |
| H  | -0.90328100 | -3.04927300 | 0.35505200  |
| H  | 0.37898300  | -3.66045100 | 1.40406100  |
| C  | 1.06626500  | -4.26850100 | -1.18760600 |
| H  | 1.50584400  | -5.04275200 | -0.54729400 |
| H  | 0.03204000  | -4.57362400 | -1.39585000 |
| H  | 1.60490800  | -4.27580600 | -2.13968300 |
| C  | 5.06548900  | -1.49463700 | -1.82580200 |
| H  | 5.58558800  | -1.64615100 | -2.78072200 |
| H  | 4.70136500  | -0.46408700 | -1.80174100 |
| H  | 5.81344600  | -1.58662600 | -1.03157600 |
| C  | 4.51250000  | -3.95666800 | -1.72655300 |
| H  | 3.74388500  | -4.72953200 | -1.64063100 |
| H  | 5.03122900  | -4.11503700 | -2.68077000 |
| H  | 5.24362400  | -4.13198700 | -0.93093300 |
| C  | 5.10502400  | -2.58634100 | 1.59363700  |
| H  | 5.52334800  | -2.97813900 | 2.52996800  |
| H  | 5.71277400  | -2.97724900 | 0.77409400  |
| H  | 5.23137100  | -1.49815000 | 1.61124500  |
| C  | 2.88026300  | -2.51797700 | 2.74415200  |
| H  | 1.82798500  | -2.80855200 | 2.75137100  |
| H  | 3.35292200  | -2.95719400 | 3.63230500  |
| H  | 2.92565900  | -1.42917500 | 2.85378600  |

5

|    |             |             |             |
|----|-------------|-------------|-------------|
| Cu | -1.81485400 | 0.01226100  | 0.14966600  |
| N  | -2.44876600 | -0.81861000 | 1.79416800  |
| N  | -2.64273500 | 1.79273300  | -0.10638800 |
| N  | -2.15206700 | -1.15707200 | -1.43152400 |
| C  | -3.31036400 | -1.26747100 | 2.42622100  |
| C  | -3.62691300 | 2.37096600  | -0.31020800 |
| C  | -2.92580700 | -1.74225500 | -2.06641500 |

|   |             |             |             |
|---|-------------|-------------|-------------|
| C | -4.88221000 | 3.04093500  | -0.58332300 |
| H | -5.49159200 | 2.36332100  | -1.18690600 |
| H | -5.40093600 | 3.25252500  | 0.35537400  |
| H | -4.70504500 | 3.97370600  | -1.12532500 |
| C | -4.42190000 | -1.83087000 | 3.16617900  |
| H | -4.98093900 | -1.02922200 | 3.65589300  |
| H | -5.07342500 | -2.33846600 | 2.45034600  |
| H | -4.06080900 | -2.53920600 | 3.91642700  |
| C | -3.92430800 | -2.47271500 | -2.82173700 |
| H | -3.45977400 | -3.30048600 | -3.36393300 |
| H | -4.66511600 | -2.85311600 | -2.11425700 |
| H | -4.41589600 | -1.79843500 | -3.52742000 |
| B | -5.72637800 | -0.59012300 | -0.14448300 |
| F | -5.12887200 | -1.85783200 | 0.06219500  |
| F | -5.22261600 | -0.03582400 | -1.34364000 |
| F | -7.11339800 | -0.73350800 | -0.23618700 |
| F | -5.40006800 | 0.25702500  | 0.93415900  |
| C | 0.94183200  | 1.12772000  | 2.00619800  |
| C | 0.92845700  | 2.62274300  | 2.39765400  |
| C | 0.35042500  | 3.35187300  | 1.16983200  |
| H | 1.70305900  | 0.54681400  | 2.52617700  |
| H | -0.03366500 | 0.66618600  | 2.18903500  |
| H | 0.33842900  | 2.80867200  | 3.29706300  |
| H | 1.94963700  | 2.96824800  | 2.57489100  |
| H | -0.74423200 | 3.39154000  | 1.19073400  |
| H | 0.74063400  | 4.36424300  | 1.05382800  |
| N | 0.78159300  | 2.48729700  | 0.06825600  |
| C | 0.33870700  | 2.39758000  | -1.22454800 |
| O | -0.16757900 | 3.25627000  | -1.92116100 |
| C | 0.64905000  | 0.91652600  | -1.55629300 |
| H | 0.06450900  | 0.48736400  | -2.36641200 |
| C | 1.17132300  | 1.15805400  | 0.51044500  |
| O | 0.33517100  | 0.29232500  | -0.28846600 |
| C | 2.17476500  | 0.71665800  | -1.65407300 |
| H | 2.65189500  | 1.46334400  | -2.28939000 |
| H | 2.43759900  | -0.27363300 | -2.01870000 |
| C | 2.59088600  | 0.77346500  | -0.08960200 |
| C | 3.66398700  | 1.72466700  | -0.16755700 |
| C | 3.45458400  | 3.12643000  | -0.42207700 |
| O | 3.43080100  | 3.58580000  | -1.56060400 |
| O | 3.47660300  | 3.86136400  | 0.70521300  |
| C | 3.45632100  | 5.29375200  | 0.51493300  |
| H | 3.42948700  | 5.71637600  | 1.51864300  |
| H | 4.35612000  | 5.62150500  | -0.01098600 |

|    |             |             |             |
|----|-------------|-------------|-------------|
| H  | 2.57187900  | 5.59529100  | -0.04973900 |
| O  | 2.96593800  | -0.44413200 | 0.48018700  |
| Si | 3.11598800  | -2.06569100 | 0.01622400  |
| C  | 4.22865300  | -2.23922100 | -1.52670400 |
| H  | 3.54700100  | -2.14357700 | -2.38608100 |
| C  | 3.92609900  | -2.81515700 | 1.56265600  |
| H  | 3.97848000  | -3.90148500 | 1.39668200  |
| C  | 1.39179300  | -2.75226900 | -0.42136900 |
| H  | 1.00413000  | -2.02394300 | -1.14686600 |
| C  | 0.40045600  | -2.78819500 | 0.75272500  |
| H  | 0.40016700  | -1.86031300 | 1.32885600  |
| H  | -0.62102800 | -2.94758000 | 0.38724900  |
| H  | 0.63240000  | -3.61222000 | 1.43610600  |
| C  | 1.42409400  | -4.12101500 | -1.12287700 |
| H  | 1.87193400  | -4.89433200 | -0.48726600 |
| H  | 0.40368700  | -4.45128200 | -1.35901100 |
| H  | 1.98237000  | -4.09528900 | -2.06308700 |
| C  | 5.31187600  | -1.15570600 | -1.67158500 |
| H  | 5.83583700  | -1.26336100 | -2.63027700 |
| H  | 4.90848000  | -0.14066900 | -1.62225300 |
| H  | 6.06427300  | -1.23552100 | -0.88044900 |
| C  | 4.87065300  | -3.63884000 | -1.61561100 |
| H  | 4.13808300  | -4.44785200 | -1.55006300 |
| H  | 5.40513900  | -3.75663300 | -2.56690500 |
| H  | 5.60070300  | -3.79168300 | -0.81438200 |
| C  | 5.36134500  | -2.28640900 | 1.74768600  |
| H  | 5.80546300  | -2.69087400 | 2.66651500  |
| H  | 6.01963600  | -2.55807600 | 0.91865100  |
| H  | 5.36829500  | -1.19387000 | 1.83266600  |
| C  | 3.12239500  | -2.56135300 | 2.85066900  |
| H  | 2.12737000  | -3.00977900 | 2.82315400  |
| H  | 3.64927500  | -2.97785400 | 3.71905300  |
| H  | 2.99905400  | -1.48721300 | 3.02832500  |

#### TS4

|    |             |             |             |
|----|-------------|-------------|-------------|
| Cu | -1.90549500 | -0.03432300 | 0.19241400  |
| N  | -2.44308100 | -0.95603900 | 1.81331200  |
| N  | -2.60460000 | 1.79710400  | -0.01490000 |
| N  | -2.14043700 | -1.08372900 | -1.46500100 |
| C  | -3.31407200 | -1.46407400 | 2.38603700  |
| C  | -3.56314200 | 2.41181900  | -0.23506800 |
| C  | -2.89343300 | -1.60885500 | -2.17324900 |
| C  | -4.78938200 | 3.12402700  | -0.52956500 |
| H  | -5.40687100 | 2.46921600  | -1.15035900 |



|   |             |             |             |
|---|-------------|-------------|-------------|
| H | -5.32005100 | 3.34854100  | 0.39960100  |
| H | -4.57063800 | 4.05293200  | -1.06307100 |
| C | -4.44014700 | -2.09698200 | 3.04190500  |
| H | -4.96154300 | -1.36861000 | 3.66880600  |
| H | -5.11561700 | -2.45304900 | 2.25938500  |
| H | -4.10088400 | -2.93516100 | 3.65634300  |
| C | -3.87038900 | -2.26710700 | -3.01675300 |
| H | -3.40698700 | -3.09686500 | -3.55697500 |
| H | -4.66939800 | -2.63825400 | -2.36995500 |
| H | -4.28598300 | -1.54967100 | -3.72892300 |
| B | -5.70990100 | -0.54630000 | -0.21231300 |
| F | -5.14222900 | -1.83886600 | -0.08847300 |
| F | -5.19404200 | 0.07042000  | -1.37608300 |
| F | -7.09954600 | -0.64957300 | -0.30803600 |
| F | -5.36021300 | 0.22304600  | 0.91591900  |
| C | 0.81977200  | 1.29127400  | 2.19338100  |
| C | 0.88581400  | 2.80675000  | 2.49943500  |
| C | 0.29295800  | 3.49896500  | 1.25147100  |
| H | 1.57580600  | 0.69862500  | 2.70685900  |
| H | -0.16912000 | 0.87738300  | 2.42254100  |
| H | 0.34139600  | 3.06815000  | 3.40807500  |
| H | 1.92922800  | 3.10893100  | 2.61792200  |
| H | -0.79547800 | 3.60179400  | 1.31280000  |
| H | 0.74401800  | 4.46856600  | 1.04696700  |
| N | 0.61442100  | 2.53355600  | 0.19751300  |
| C | 0.31516700  | 2.40967600  | -1.13391900 |
| O | -0.06432400 | 3.26223700  | -1.91429400 |
| C | 0.64750200  | 0.92214900  | -1.39061800 |
| H | 0.05376200  | 0.44881700  | -2.16712900 |
| C | 0.98453000  | 1.27542900  | 0.70544300  |
| O | 0.34728000  | 0.33452100  | -0.09187200 |
| C | 2.18673600  | 0.73102600  | -1.48733700 |
| H | 2.65492300  | 1.52763300  | -2.06657600 |
| H | 2.40428800  | -0.21456500 | -1.98109400 |
| C | 2.68858400  | 0.71947000  | -0.02876200 |
| C | 3.45547400  | 1.73440600  | 0.54212700  |
| C | 3.66858100  | 2.97407100  | -0.14370400 |
| O | 4.47963800  | 3.01121000  | -1.07287100 |
| O | 3.09012900  | 4.07235300  | 0.38202300  |
| C | 3.36031700  | 5.30819000  | -0.30749300 |
| H | 2.83195000  | 6.07781200  | 0.25511500  |
| H | 4.43193900  | 5.51888200  | -0.32004600 |
| H | 2.98325300  | 5.26793600  | -1.33286700 |
| O | 2.82391900  | -0.52794400 | 0.55063000  |

|    |             |             |             |
|----|-------------|-------------|-------------|
| Si | 3.08614000  | -2.09646300 | -0.02694400 |
| C  | 4.33397700  | -2.07888400 | -1.47348700 |
| H  | 3.72660700  | -1.95253600 | -2.38264800 |
| C  | 3.79488200  | -2.94945900 | 1.51699300  |
| H  | 3.92841700  | -4.01194200 | 1.26542800  |
| C  | 1.43063500  | -2.79490500 | -0.66320300 |
| H  | 1.07595200  | -2.02314800 | -1.36166800 |
| C  | 0.34590400  | -2.95722300 | 0.41487300  |
| H  | 0.26973300  | -2.08081600 | 1.06243300  |
| H  | -0.63630800 | -3.11099000 | -0.04812400 |
| H  | 0.54764400  | -3.82996600 | 1.04493000  |
| C  | 1.58344900  | -4.09760700 | -1.46736800 |
| H  | 2.00449600  | -4.90394600 | -0.85492800 |
| H  | 0.60574000  | -4.44459700 | -1.82738100 |
| H  | 2.22744500  | -3.97128600 | -2.34279300 |
| C  | 5.35130400  | -0.92414200 | -1.43082800 |
| H  | 6.01860500  | -0.97270900 | -2.30137300 |
| H  | 4.88463100  | 0.06430100  | -1.43658200 |
| H  | 5.98147900  | -0.97464900 | -0.53773700 |
| C  | 5.06859400  | -3.42813900 | -1.60965000 |
| H  | 4.38367500  | -4.27880100 | -1.67231700 |
| H  | 5.68765000  | -3.43831300 | -2.51583000 |
| H  | 5.73659900  | -3.60690100 | -0.76110900 |
| C  | 5.17169300  | -2.36139700 | 1.88253700  |
| H  | 5.55663100  | -2.82571200 | 2.79983000  |
| H  | 5.91941900  | -2.51525400 | 1.10040300  |
| H  | 5.09882800  | -1.28344200 | 2.06578900  |
| C  | 2.86682200  | -2.85526400 | 2.74188700  |
| H  | 1.91255400  | -3.36310400 | 2.58936000  |
| H  | 3.34613800  | -3.30801800 | 3.61965900  |
| H  | 2.65317400  | -1.80967000 | 2.99016900  |

## 6

|    |             |             |             |
|----|-------------|-------------|-------------|
| Cu | -2.39061000 | -0.78782200 | -0.16228200 |
| N  | -2.94406400 | -0.93223900 | 1.65594200  |
| N  | -2.74108700 | 1.22370700  | -0.63764000 |
| N  | -1.77909400 | -1.74112400 | -1.67840900 |
| C  | -3.75317700 | -1.02547000 | 2.47920600  |
| C  | -3.68431800 | 1.82443100  | -0.95118700 |
| C  | -1.39724900 | -2.34027700 | -2.59153300 |
| C  | -4.87659000 | 2.54083000  | -1.35535600 |
| H  | -5.54177700 | 1.82520000  | -1.84447500 |
| H  | -5.37679100 | 2.95121700  | -0.47506000 |
| H  | -4.61522800 | 3.34738400  | -2.04540900 |

|    |             |             |             |
|----|-------------|-------------|-------------|
| C  | -4.80282000 | -1.14466000 | 3.46857600  |
| H  | -5.12592500 | -0.14965700 | 3.78625900  |
| H  | -5.63998400 | -1.66396500 | 2.99478900  |
| H  | -4.44891300 | -1.71231600 | 4.33320500  |
| C  | -0.90333500 | -3.09619200 | -3.72567600 |
| H  | 0.06614200  | -3.53678200 | -3.47599900 |
| H  | -1.61059400 | -3.89467400 | -3.96744200 |
| H  | -0.79352300 | -2.43587300 | -4.59060000 |
| B  | -6.07677600 | -0.68481000 | -0.10132400 |
| F  | -5.71997400 | -1.90569700 | 0.50943900  |
| F  | -5.38944700 | -0.57213600 | -1.33631300 |
| F  | -7.45390600 | -0.64286300 | -0.32555100 |
| F  | -5.69517600 | 0.38600700  | 0.73748000  |
| C  | -0.27429400 | 1.48957400  | 2.19500700  |
| C  | -0.07759800 | 3.01329600  | 2.43660200  |
| C  | -0.30053500 | 3.69603400  | 1.06063400  |
| H  | 0.40574000  | 0.84535500  | 2.75545700  |
| H  | -1.30222300 | 1.15224800  | 2.37986000  |
| H  | -0.75977600 | 3.39923300  | 3.19335000  |
| H  | 0.95037300  | 3.19002300  | 2.75649600  |
| H  | -1.32576100 | 4.04212100  | 0.90877700  |
| H  | 0.40880400  | 4.49408100  | 0.85547400  |
| N  | -0.04457400 | 2.57621300  | 0.14020200  |
| C  | 0.14528300  | 2.40869800  | -1.24888700 |
| O  | 0.08691900  | 3.25966200  | -2.09731400 |
| C  | 0.45041000  | 0.91720700  | -1.38606400 |
| H  | -0.22536700 | 0.43540100  | -2.09045200 |
| C  | -0.02882600 | 1.40048500  | 0.74264400  |
| O  | 0.12273300  | 0.38187900  | -0.04012600 |
| C  | 1.93771100  | 0.62484800  | -1.66015500 |
| H  | 2.25215600  | 1.31178600  | -2.45198600 |
| H  | 2.00681100  | -0.39047100 | -2.05861300 |
| C  | 2.78974900  | 0.83072200  | -0.41575100 |
| C  | 3.34359400  | 1.97420300  | -0.02895300 |
| C  | 3.33766000  | 3.13988700  | -0.84205600 |
| O  | 4.03814900  | 3.38391300  | -1.83173700 |
| O  | 2.49860900  | 4.13958400  | -0.34039300 |
| C  | 2.47537100  | 5.34434100  | -1.10555000 |
| H  | 1.75507500  | 6.00333600  | -0.61437500 |
| H  | 3.45803300  | 5.82662700  | -1.12307600 |
| H  | 2.15761700  | 5.16138500  | -2.13626400 |
| O  | 2.85947700  | -0.31425100 | 0.39585200  |
| Si | 3.16712400  | -1.93026700 | 0.06817600  |
| C  | 4.25421900  | -2.15704400 | -1.48928400 |

|   |             |             |             |
|---|-------------|-------------|-------------|
| H | 3.54456000  | -2.22407500 | -2.32873900 |
| C | 4.07380100  | -2.52684700 | 1.63048400  |
| H | 4.33082800  | -3.58537300 | 1.48047900  |
| C | 1.49096700  | -2.78472100 | -0.27155900 |
| H | 1.05936900  | -2.16224400 | -1.06941500 |
| C | 0.49932200  | -2.75572600 | 0.90322800  |
| H | 0.45108200  | -1.77489500 | 1.38248900  |
| H | -0.51192100 | -3.00870300 | 0.55985400  |
| H | 0.77307400  | -3.49027600 | 1.66701800  |
| C | 1.60985600  | -4.21452700 | -0.82453700 |
| H | 2.10721700  | -4.88197300 | -0.11038700 |
| H | 0.61636900  | -4.64071500 | -1.01946700 |
| H | 2.17389700  | -4.25411000 | -1.76160100 |
| C | 5.21304900  | -0.99123000 | -1.79134200 |
| H | 5.76066100  | -1.17831000 | -2.72493100 |
| H | 4.69943800  | -0.03203900 | -1.89026800 |
| H | 5.95854900  | -0.86922700 | -0.99887200 |
| C | 5.03905100  | -3.48339100 | -1.44606700 |
| H | 4.39981500  | -4.35002400 | -1.25249500 |
| H | 5.55413900  | -3.66100600 | -2.39920000 |
| H | 5.80639300  | -3.46135400 | -0.66468100 |
| C | 5.38238700  | -1.73125500 | 1.80173400  |
| H | 5.89238800  | -2.01671100 | 2.73127400  |
| H | 6.08232100  | -1.90037900 | 0.97845600  |
| H | 5.18219500  | -0.65552700 | 1.84851000  |
| C | 3.22800300  | -2.41964700 | 2.91219100  |
| H | 2.39983100  | -3.13218200 | 2.92413400  |
| H | 3.84528500  | -2.61898900 | 3.79840600  |
| H | 2.80705900  | -1.41643800 | 3.02968200  |

#### TS5

|    |             |             |             |
|----|-------------|-------------|-------------|
| Cu | -1.98229700 | -1.18092500 | -0.57943900 |
| N  | -2.35077000 | -1.50537400 | 1.27688800  |
| N  | -2.76728000 | 0.56081300  | -1.16581700 |
| N  | -1.06181900 | -2.12297600 | -1.96700900 |
| C  | -2.96226200 | -1.63398500 | 2.25105400  |
| C  | -3.69334200 | 1.24095800  | -1.31686000 |
| C  | -0.46650600 | -2.65932800 | -2.80221500 |
| C  | -4.87976900 | 2.05596700  | -1.48481300 |
| H  | -5.75413500 | 1.41486100  | -1.33698100 |
| H  | -4.88812200 | 2.85443800  | -0.73764500 |
| H  | -4.89621100 | 2.49352900  | -2.48655500 |
| C  | -3.79590400 | -1.77807000 | 3.42737800  |
| H  | -3.70303300 | -0.88914200 | 4.05775100  |

|    |             |             |             |
|----|-------------|-------------|-------------|
| H  | -4.83094000 | -1.87943100 | 3.08649500  |
| H  | -3.49905400 | -2.66257000 | 3.99731300  |
| C  | 0.29769200  | -3.32162600 | -3.84202100 |
| H  | 1.31630300  | -2.92396400 | -3.85351000 |
| H  | 0.33176000  | -4.39692600 | -3.64714800 |
| H  | -0.17172700 | -3.14318600 | -4.81379200 |
| B  | -5.74137900 | -0.94255600 | 0.36979600  |
| F  | -6.30075900 | -1.78052800 | 1.35083000  |
| F  | -4.85774400 | -1.69531300 | -0.43885200 |
| F  | -6.75363700 | -0.39483700 | -0.43924200 |
| F  | -5.04189200 | 0.10544100  | 1.00237300  |
| C  | -0.51861400 | 1.53978600  | 2.01654200  |
| C  | -0.98247000 | 3.01959300  | 2.03398100  |
| C  | -1.28158500 | 3.37426200  | 0.55703500  |
| H  | 0.19019300  | 1.28197100  | 2.80168400  |
| H  | -1.36542900 | 0.84247000  | 2.05726200  |
| H  | -1.85612200 | 3.16756400  | 2.66943100  |
| H  | -0.16417300 | 3.64755800  | 2.38743900  |
| H  | -2.31766900 | 3.15920300  | 0.27854200  |
| H  | -1.03198400 | 4.39997600  | 0.29773900  |
| N  | -0.41578700 | 2.42703900  | -0.15507000 |
| C  | -0.11834900 | 2.14426300  | -1.47733000 |
| O  | -0.38188900 | 2.80610900  | -2.45872800 |
| C  | 0.67284100  | 0.83087600  | -1.37662600 |
| H  | 0.36665800  | 0.09991700  | -2.11947800 |
| C  | 0.06309600  | 1.44119000  | 0.65142200  |
| O  | 0.30246600  | 0.33316500  | -0.05535500 |
| C  | 2.23227400  | 1.06167400  | -1.35680700 |
| H  | 2.46821600  | 1.95464200  | -1.93775200 |
| H  | 2.71149700  | 0.20041700  | -1.82367500 |
| C  | 2.60056800  | 1.25518500  | 0.09471600  |
| C  | 2.32289700  | 2.38618100  | 0.79902100  |
| C  | 2.33971800  | 3.64702200  | 0.11216600  |
| O  | 3.19303900  | 4.02357200  | -0.70119700 |
| O  | 1.38180200  | 4.53476500  | 0.55273800  |
| C  | 1.37738700  | 5.80327300  | -0.10606200 |
| H  | 0.58776200  | 6.38690700  | 0.37172600  |
| H  | 2.33692500  | 6.31475900  | 0.00900600  |
| H  | 1.16326100  | 5.69560100  | -1.17467300 |
| O  | 2.92387000  | 0.12897500  | 0.77518900  |
| Si | 3.54400700  | -1.40854600 | 0.39546400  |
| C  | 4.87952600  | -1.25118900 | -0.95902800 |
| H  | 4.33478200  | -1.30269200 | -1.91429300 |
| C  | 4.25685200  | -1.95182300 | 2.06919500  |

|   |            |             |             |
|---|------------|-------------|-------------|
| H | 4.57344400 | -2.99941800 | 1.95516200  |
| C | 2.11513300 | -2.48209300 | -0.26457600 |
| H | 1.65539300 | -1.85375300 | -1.04011500 |
| C | 1.02662600 | -2.79689300 | 0.77364600  |
| H | 0.70190600 | -1.90756800 | 1.31882500  |
| H | 0.14401900 | -3.22576400 | 0.28532700  |
| H | 1.38393600 | -3.53303800 | 1.50119500  |
| C | 2.58245000 | -3.77808600 | -0.94888400 |
| H | 3.11961700 | -4.43174400 | -0.25155000 |
| H | 1.72067300 | -4.34748400 | -1.32068900 |
| H | 3.24194300 | -3.58661200 | -1.80043800 |
| C | 5.65096400 | 0.08072700  | -0.93639400 |
| H | 6.35110600 | 0.13077200  | -1.78019000 |
| H | 4.99603300 | 0.95424900  | -1.00146800 |
| H | 6.23925900 | 0.18741800  | -0.01990800 |
| C | 5.86235900 | -2.43909600 | -0.93674000 |
| H | 5.35602000 | -3.40784300 | -0.97646600 |
| H | 6.54395200 | -2.38961500 | -1.79542300 |
| H | 6.48129500 | -2.42883100 | -0.03411400 |
| C | 5.49210200 | -1.11414700 | 2.45362300  |
| H | 5.87702000 | -1.42967800 | 3.43187500  |
| H | 6.30958700 | -1.20835300 | 1.73474100  |
| H | 5.23637400 | -0.05142000 | 2.53152300  |
| C | 3.22724700 | -1.87519600 | 3.21259600  |
| H | 2.38890100 | -2.56034600 | 3.07472300  |
| H | 3.70304800 | -2.12454900 | 4.16985100  |
| H | 2.82110500 | -0.86171100 | 3.30228300  |

7

|    |             |             |             |
|----|-------------|-------------|-------------|
| Cu | -1.24176100 | 1.35553700  | -1.81337200 |
| N  | -0.78601600 | -0.53647100 | -1.97029300 |
| N  | -3.14416700 | 1.50650200  | -1.47230100 |
| N  | -0.01834500 | 2.67742900  | -2.51876300 |
| C  | -0.81415800 | -1.69342200 | -1.97244200 |
| C  | -4.23597000 | 1.35230100  | -1.12146300 |
| C  | 0.75480200  | 3.41233800  | -2.96868600 |
| C  | -5.59164600 | 1.13568800  | -0.65542000 |
| H  | -5.78920300 | 0.06010200  | -0.62386400 |
| H  | -5.69822400 | 1.55322700  | 0.35025300  |
| H  | -6.30079200 | 1.62780800  | -1.32680300 |
| C  | -0.88473100 | -3.14131500 | -1.99699100 |
| H  | 0.08601200  | -3.56349000 | -1.73169600 |
| H  | -1.63603500 | -3.46746000 | -1.27527300 |
| H  | -1.17168800 | -3.47194000 | -2.99924000 |

|    |             |             |             |
|----|-------------|-------------|-------------|
| C  | 1.73691800  | 4.32532300  | -3.52312600 |
| H  | 2.74120700  | 3.91546300  | -3.38145500 |
| H  | 1.54977500  | 4.45902000  | -4.59251600 |
| H  | 1.66572800  | 5.29428100  | -3.02083000 |
| B  | -4.08971200 | -2.18739300 | -0.67664100 |
| F  | -3.65775400 | -3.47314300 | -0.28880100 |
| F  | -3.73352000 | -1.95563300 | -2.01548100 |
| F  | -5.48641500 | -2.09040200 | -0.53105200 |
| F  | -3.47146800 | -1.22555800 | 0.14989700  |
| C  | -2.44674100 | 1.18227800  | 1.99242400  |
| C  | -2.45171100 | 1.23029200  | 3.53335800  |
| C  | -1.21996900 | 2.07447300  | 3.92468700  |
| H  | -2.94862200 | 0.31006000  | 1.58479100  |
| H  | -2.91281100 | 2.08456900  | 1.58570200  |
| H  | -3.37438900 | 1.66471500  | 3.92508200  |
| H  | -2.35132900 | 0.22109900  | 3.93292600  |
| H  | -1.46872100 | 3.12695700  | 4.10129000  |
| H  | -0.71801200 | 1.68989900  | 4.81663000  |
| N  | -0.35667300 | 1.98030700  | 2.74600600  |
| C  | 0.50633200  | 2.92925700  | 2.29796300  |
| O  | 1.10131700  | 3.77515900  | 2.95194200  |
| C  | 0.53591500  | 2.72506600  | 0.77160600  |
| H  | 0.67810500  | 3.66836200  | 0.24574300  |
| C  | -0.97122600 | 1.27451700  | 1.59698500  |
| O  | -0.78853200 | 2.22974400  | 0.51797000  |
| C  | 1.54439200  | 1.65841900  | 0.34360800  |
| H  | 2.50382900  | 1.82114200  | 0.84574800  |
| H  | 1.72262200  | 1.73933300  | -0.73132000 |
| C  | 1.04167500  | 0.25772700  | 0.61802300  |
| C  | -0.16733900 | 0.02581500  | 1.20655300  |
| C  | -0.62302500 | -1.35314200 | 1.44756600  |
| O  | -0.26488700 | -2.34639200 | 0.83239600  |
| O  | -1.49159900 | -1.43518700 | 2.47899500  |
| C  | -2.08654600 | -2.72834700 | 2.68688500  |
| H  | -2.82430200 | -2.58425300 | 3.47713900  |
| H  | -2.56858200 | -3.07691100 | 1.77309000  |
| H  | -1.33129000 | -3.45124500 | 3.00727900  |
| O  | 1.83707500  | -0.73482600 | 0.22072200  |
| Si | 3.52352500  | -0.85133600 | -0.04796300 |
| C  | 4.43161500  | -0.15971000 | 1.47838400  |
| H  | 4.61748600  | 0.90283500  | 1.26172600  |
| C  | 3.77774500  | -2.71548500 | -0.24612400 |
| H  | 4.86667800  | -2.86770700 | -0.24274200 |
| C  | 3.96604800  | 0.15788100  | -1.59926900 |

|   |            |             |             |
|---|------------|-------------|-------------|
| H | 3.97507100 | 1.20558500  | -1.26482300 |
| C | 2.93480000 | 0.04053700  | -2.73629000 |
| H | 1.91219900 | 0.22680300  | -2.39721800 |
| H | 3.16060600 | 0.75828000  | -3.53577500 |
| H | 2.94745500 | -0.95654500 | -3.18577100 |
| C | 5.38249300 | -0.17720100 | -2.10123800 |
| H | 5.46271000 | -1.22736800 | -2.40289400 |
| H | 5.63918900 | 0.43288400  | -2.97668300 |
| H | 6.14631700 | 0.00886500  | -1.33908900 |
| C | 3.60961900 | -0.23511800 | 2.77853700  |
| H | 4.18352000 | 0.18108500  | 3.61612900  |
| H | 2.66991700 | 0.32178400  | 2.72121300  |
| H | 3.35823800 | -1.26867900 | 3.03735700  |
| C | 5.80249100 | -0.83638200 | 1.67727600  |
| H | 6.42947700 | -0.79171000 | 0.78071400  |
| H | 6.35643300 | -0.34992500 | 2.48975900  |
| H | 5.68804600 | -1.89166500 | 1.94831800  |
| C | 3.17929700 | -3.48495600 | 0.94613300  |
| H | 3.34960900 | -4.56327000 | 0.83198400  |
| H | 3.62717000 | -3.18162000 | 1.89770700  |
| H | 2.09979600 | -3.31770400 | 1.01553600  |
| C | 3.23126700 | -3.26524100 | -1.57410000 |
| H | 3.75954800 | -2.85337200 | -2.43846000 |
| H | 3.33757800 | -4.35704000 | -1.61181600 |
| H | 2.16771100 | -3.03643200 | -1.69421500 |

**TS6**

|    |             |             |             |
|----|-------------|-------------|-------------|
| Rh | -1.14575200 | 0.07059100  | -0.01094700 |
| O  | -1.65855700 | 0.99387300  | 1.72844200  |
| O  | -1.26089300 | -1.73697100 | 0.96464200  |
| O  | -0.74780000 | -0.86333900 | -1.79007100 |
| O  | -1.17175100 | 1.87486100  | -0.97079100 |
| Rh | -3.46410000 | -0.13450300 | -0.49731700 |
| C  | -2.26169200 | 2.31093900  | -1.46207800 |
| O  | -3.37787200 | 1.69552000  | -1.41828800 |
| C  | -1.71860900 | -1.21079100 | -2.54109200 |
| O  | -2.94666800 | -1.02512200 | -2.26993800 |
| C  | -2.88198400 | 1.10136100  | 2.05265000  |
| O  | -3.85900000 | 0.73194600  | 1.32181800  |
| O  | -3.45026200 | -1.93865100 | 0.45194100  |
| C  | -2.38287400 | -2.34403000 | 1.01046500  |
| C  | -3.20717900 | 1.70760900  | 3.41973400  |
| C  | -2.24694500 | 3.66869700  | -2.17118700 |
| C  | -1.35824900 | -1.89176100 | -3.86429300 |



|   |             |             |             |
|---|-------------|-------------|-------------|
| C | -2.44406700 | -3.65454600 | 1.80012900  |
| C | -4.09577000 | 2.97249700  | 3.20310300  |
| H | -4.27701200 | 3.40975000  | 4.19064000  |
| H | -5.06120500 | 2.64606300  | 2.80551300  |
| C | -1.92129400 | 2.06336700  | 4.17683000  |
| H | -2.18247800 | 2.46912800  | 5.15997000  |
| H | -1.28852000 | 1.18402200  | 4.32074400  |
| H | -1.33389300 | 2.81348500  | 3.64350500  |
| C | -4.00967200 | 0.66213700  | 4.21926900  |
| H | -4.27532600 | 1.07142700  | 5.19932100  |
| H | -4.92872600 | 0.38480100  | 3.69663800  |
| H | -3.41427200 | -0.24317500 | 4.37908000  |
| C | -3.29881800 | 4.60047000  | -1.49330500 |
| H | -3.24704200 | 5.56531000  | -2.00895300 |
| H | -4.29238000 | 4.18194600  | -1.67666400 |
| C | -2.66244400 | 3.43542300  | -3.63791200 |
| H | -2.66353400 | 4.38829100  | -4.17688600 |
| H | -1.95762000 | 2.76289600  | -4.13877300 |
| H | -3.66189100 | 2.99774400  | -3.70088500 |
| C | -0.84992100 | 4.29648500  | -2.12687300 |
| H | -0.12844100 | 3.66819800  | -2.65193900 |
| H | -0.87526700 | 5.27385300  | -2.61992800 |
| H | -0.49441500 | 4.43335900  | -1.10403000 |
| C | -2.61914200 | -2.23209000 | -4.66663600 |
| H | -2.33191100 | -2.71885500 | -5.60440300 |
| H | -3.28011800 | -2.90489000 | -4.11674600 |
| H | -3.18306400 | -1.32732500 | -4.90945100 |
| C | -0.47114700 | -0.92063700 | -4.66921600 |
| H | 0.43593200  | -0.66491000 | -4.11703500 |
| H | -0.18404700 | -1.38472200 | -5.61838000 |
| H | -1.01098600 | 0.00552800  | -4.89372900 |
| C | -0.53107100 | -3.17920300 | -3.55568500 |
| H | -0.32127700 | -3.65944600 | -4.51729500 |
| H | 0.42796400  | -2.87080000 | -3.12902400 |
| C | -1.45060400 | -4.67187300 | 1.15762100  |
| H | -0.43447200 | -4.31234900 | 1.33477400  |
| H | -1.56393300 | -5.61592700 | 1.70066800  |
| C | -1.99986500 | -3.35723800 | 3.24597600  |
| H | -2.70484700 | -2.67524000 | 3.73335400  |
| H | -1.97247200 | -4.28683900 | 3.82372000  |
| H | -1.01049900 | -2.89630800 | 3.27428300  |
| C | -3.86758600 | -4.22441500 | 1.80351200  |
| H | -3.88271100 | -5.15418600 | 2.38166600  |
| H | -4.56877800 | -3.52332700 | 2.26417800  |

|   |             |             |             |
|---|-------------|-------------|-------------|
| H | -4.22020100 | -4.44073700 | 0.79322300  |
| C | -3.48987500 | 4.00176900  | 2.27762900  |
| C | -3.69813300 | 3.90548600  | 0.89580500  |
| C | -2.68085800 | 5.03928000  | 2.75986500  |
| C | -3.09845100 | 4.79105600  | -0.00795400 |
| H | -4.33364200 | 3.11479500  | 0.51312600  |
| C | -2.09192900 | 5.94469400  | 1.87509500  |
| H | -2.52099300 | 5.14316900  | 3.82942500  |
| C | -2.29323800 | 5.81969000  | 0.49949100  |
| H | -1.47756300 | 6.75401500  | 2.25987900  |
| H | -1.83417300 | 6.52888600  | -0.18350300 |
| C | -1.64907900 | -4.89134100 | -0.32418800 |
| C | -1.02035700 | -4.03757400 | -1.23831200 |
| C | -2.47046100 | -5.91087400 | -0.82205000 |
| C | -1.20247100 | -4.15897800 | -2.62077700 |
| H | -0.38158000 | -3.25153400 | -0.85910200 |
| C | -2.65395300 | -6.05786400 | -2.19866400 |
| H | -2.95640200 | -6.59536000 | -0.13236800 |
| C | -2.02819400 | -5.18765700 | -3.09383200 |
| H | -3.28267000 | -6.85941200 | -2.57630300 |
| H | -2.17109900 | -5.31447200 | -4.16331800 |
| C | 2.09922200  | -1.96442500 | -0.33338700 |
| C | 2.29475000  | -3.21559800 | 0.58113300  |
| C | 1.95284400  | -2.78691500 | 2.04242600  |
| H | 2.96070900  | -1.76271800 | -0.97493800 |
| H | 1.21812300  | -2.03956500 | -0.97606000 |
| H | 1.64615100  | -4.03166500 | 0.25898700  |
| H | 3.32527300  | -3.57014400 | 0.52748700  |
| H | 1.03602900  | -3.24736600 | 2.41345900  |
| H | 2.75954500  | -3.01030000 | 2.74308200  |
| N | 1.74351800  | -1.34823200 | 1.92415900  |
| C | 1.28520300  | -0.32139600 | 2.77550700  |
| O | 1.04422300  | -0.43150900 | 3.98265000  |
| C | 1.28644000  | 0.80810600  | 1.87292700  |
| H | 0.74922800  | 1.73413900  | 1.99272000  |
| C | 1.91401300  | -0.88855100 | 0.66918900  |
| O | 1.31633000  | 0.31067300  | 0.55688100  |
| C | 3.47394500  | 1.22551200  | 1.74627500  |
| H | 3.66316100  | 1.22053800  | 2.80928100  |
| H | 3.27406100  | 2.18622200  | 1.28793300  |
| C | 4.02124700  | 0.22196400  | 0.95858900  |
| C | 4.77874600  | -0.91338300 | 1.52535500  |
| N | 5.37604200  | -1.71391600 | 0.67386900  |
| N | 5.91183300  | -2.38997600 | -0.07224100 |

|          |             |             |             |
|----------|-------------|-------------|-------------|
| C        | 4.88314700  | -1.27738800 | 2.93921600  |
| O        | 4.50381200  | -0.58374600 | 3.86729300  |
| O        | 5.45418200  | -2.49388800 | 3.09600200  |
| C        | 5.64023600  | -2.91862900 | 4.45999800  |
| H        | 6.10792500  | -3.90082700 | 4.39579400  |
| H        | 6.29108200  | -2.22237600 | 4.99446400  |
| H        | 4.67970100  | -2.98798400 | 4.97578600  |
| O        | 4.27272200  | 0.33641000  | -0.38802500 |
| Si       | 4.60477300  | 1.66459100  | -1.39181900 |
| C        | 5.61963800  | 2.98312000  | -0.46114200 |
| H        | 4.87449800  | 3.59204900  | 0.07218500  |
| C        | 5.57769800  | 0.84721300  | -2.80703500 |
| H        | 5.65860900  | 1.59916800  | -3.60627000 |
| C        | 2.92698600  | 2.39856100  | -1.89868500 |
| H        | 2.44101600  | 2.62091800  | -0.93651300 |
| C        | 2.01971600  | 1.40599600  | -2.64678200 |
| H        | 2.00547000  | 0.41970000  | -2.17691200 |
| H        | 0.98651000  | 1.76650600  | -2.66604300 |
| H        | 2.34854700  | 1.28270400  | -3.68440900 |
| C        | 3.04310700  | 3.71960300  | -2.67894300 |
| H        | 3.61939200  | 3.59373200  | -3.60378600 |
| H        | 2.05160800  | 4.08951900  | -2.96645700 |
| H        | 3.52411700  | 4.50581100  | -2.08952400 |
| C        | 6.59304900  | 2.42057400  | 0.58981200  |
| H        | 7.12169300  | 3.23936300  | 1.09519500  |
| H        | 6.07859600  | 1.83826700  | 1.35796800  |
| H        | 7.35302600  | 1.77704400  | 0.13614800  |
| C        | 6.36734800  | 3.91802500  | -1.43302100 |
| H        | 5.70801200  | 4.37230500  | -2.17780600 |
| H        | 6.85154200  | 4.73489300  | -0.88275800 |
| H        | 7.15446700  | 3.38420800  | -1.97540800 |
| C        | 7.00312800  | 0.45034100  | -2.37674000 |
| H        | 7.53368100  | -0.03043400 | -3.20883600 |
| H        | 7.60420400  | 1.30469600  | -2.05651100 |
| H        | 6.97942300  | -0.26989800 | -1.55112100 |
| C        | 4.86832500  | -0.39363000 | -3.38222400 |
| H        | 3.88689400  | -0.16472900 | -3.80248700 |
| H        | 5.47365100  | -0.84375300 | -4.17972300 |
| H        | 4.73147100  | -1.15581100 | -2.60702100 |
| <b>8</b> |             |             |             |
| Cu       | -0.38043400 | -1.30197000 | 0.03651900  |
| N        | 0.73173200  | -2.03137200 | -1.49624700 |
| N        | -0.44163000 | 0.77087800  | -0.52382000 |

|   |             |             |             |
|---|-------------|-------------|-------------|
| N | 0.85419200  | -1.26848100 | 1.56342500  |
| C | 1.66329200  | -2.06016200 | -2.18499500 |
| C | 0.01979800  | 1.83000600  | -0.62258200 |
| C | 1.72598900  | -1.02277800 | 2.28464600  |
| C | 0.59303900  | 3.15794900  | -0.75085800 |
| H | 0.45774000  | 3.70429600  | 0.18669500  |
| H | 1.66288900  | 3.07042100  | -0.95723800 |
| H | 0.09541000  | 3.69856200  | -1.56075400 |
| C | 2.85481700  | -2.04973100 | -3.01301500 |
| H | 3.51332200  | -1.26192500 | -2.63719300 |
| H | 3.36315800  | -3.01588700 | -2.95120100 |
| H | 2.58900900  | -1.84552200 | -4.05385300 |
| C | 2.83875000  | -0.69785000 | 3.15700200  |
| H | 2.53010900  | 0.06930100  | 3.87274300  |
| H | 3.15918000  | -1.59088100 | 3.70071400  |
| H | 3.65988300  | -0.31094100 | 2.54694600  |
| B | 3.45327600  | 1.18123400  | 0.08762400  |
| F | 3.04432500  | 0.14229800  | -0.77359000 |
| F | 2.41266100  | 1.48653500  | 0.98917400  |
| F | 4.58642000  | 0.77243900  | 0.81323000  |
| F | 3.75114900  | 2.32696500  | -0.67335000 |
| C | -3.81192400 | 1.38594600  | -1.48090500 |
| C | -3.85904600 | 2.38336900  | -0.28333700 |
| C | -3.86757000 | 1.51670900  | 1.00876400  |
| H | -4.80087000 | 1.19894300  | -1.91508400 |
| H | -3.14213000 | 1.69697200  | -2.28514500 |
| H | -2.96020900 | 3.00321500  | -0.29616300 |
| H | -4.72877700 | 3.03870500  | -0.33190400 |
| H | -3.21026500 | 1.90117000  | 1.78976800  |
| H | -4.86883600 | 1.37104300  | 1.42221200  |
| N | -3.35603200 | 0.23703100  | 0.51190400  |
| C | -2.90849100 | -1.00916700 | 1.09713700  |
| O | -2.94998900 | -1.24717800 | 2.29843000  |
| C | -2.41107100 | -1.72530400 | -0.06005000 |
| H | -2.59283700 | -2.78594200 | -0.19330700 |
| C | -3.32943400 | 0.15690900  | -0.80163400 |
| O | -2.88480100 | -0.97737900 | -1.23861400 |

9

|    |             |             |            |
|----|-------------|-------------|------------|
| Rh | -0.20103100 | 0.02272400  | 0.61590500 |
| O  | -1.68223600 | -1.36835600 | 0.83963700 |
| O  | 1.17782700  | -1.49176600 | 0.43539800 |
| O  | 1.25865500  | 1.42968700  | 0.24200500 |
| O  | -1.60215700 | 1.51995600  | 0.62793600 |

|    |             |             |             |
|----|-------------|-------------|-------------|
| Rh | -0.51029600 | -0.14738600 | -1.78605300 |
| C  | -2.13297900 | 1.88531900  | -0.46974500 |
| O  | -1.88323000 | 1.38386900  | -1.61198300 |
| C  | 1.53087500  | 1.74496600  | -0.96524100 |
| O  | 0.97092600  | 1.25984900  | -1.99435100 |
| C  | -2.22623800 | -1.87627700 | -0.19288100 |
| O  | -1.94692900 | -1.57380600 | -1.39644900 |
| O  | 0.89704900  | -1.64081800 | -1.80295500 |
| C  | 1.43345000  | -1.99417500 | -0.70766300 |
| C  | -3.30238700 | -2.94780100 | 0.02073800  |
| C  | -3.15192000 | 3.03125100  | -0.42461000 |
| C  | 2.61211000  | 2.81502600  | -1.16041000 |
| C  | 2.46226600  | -3.13119900 | -0.72677000 |
| C  | -4.61576500 | -2.48444700 | -0.68399700 |
| H  | -5.36844300 | -3.25887200 | -0.50105500 |
| H  | -4.42910400 | -2.45563800 | -1.76130100 |
| C  | -3.54156700 | -3.19844500 | 1.51412400  |
| H  | -4.31651700 | -3.96265500 | 1.63662300  |
| H  | -2.62931100 | -3.55399500 | 2.00077600  |
| H  | -3.86658400 | -2.29252600 | 2.02967300  |
| C  | -2.81375000 | -4.24609500 | -0.65182300 |
| H  | -3.56558300 | -5.03289300 | -0.52977700 |
| H  | -2.63883800 | -4.09481800 | -1.72006600 |
| H  | -1.88111000 | -4.59337700 | -0.19423500 |
| C  | -4.48920700 | 2.53641700  | -1.05735600 |
| H  | -5.20112800 | 3.36646900  | -0.99413500 |
| H  | -4.30808000 | 2.33854100  | -2.11757700 |
| C  | -2.59682900 | 4.18653500  | -1.28170700 |
| H  | -3.30370800 | 5.02292000  | -1.28122300 |
| H  | -1.64424400 | 4.54740700  | -0.87836700 |
| H  | -2.43480600 | 3.86821600  | -2.31470200 |
| C  | -3.37503700 | 3.51734800  | 1.01211000  |
| H  | -2.44479500 | 3.89391300  | 1.44631200  |
| H  | -4.10707000 | 4.33199900  | 1.01163400  |
| H  | -3.74910700 | 2.71938000  | 1.65652200  |
| C  | 2.90349000  | 3.03761100  | -2.64860300 |
| H  | 3.68036400  | 3.80169000  | -2.75815500 |
| H  | 3.25004500  | 2.12247100  | -3.13336400 |
| H  | 2.00902000  | 3.38088900  | -3.17499300 |
| C  | 2.09166000  | 4.12244700  | -0.52949300 |
| H  | 1.87589300  | 3.98876500  | 0.53387900  |
| H  | 2.84274600  | 4.91202700  | -0.63702500 |
| H  | 1.17471600  | 4.45563300  | -1.02710700 |
| C  | 3.90279000  | 2.37760900  | -0.40340100 |

|   |             |             |             |
|---|-------------|-------------|-------------|
| H | 4.65452800  | 3.15591400  | -0.57227800 |
| H | 3.67739600  | 2.36871500  | 0.66513000  |
| C | 3.76539000  | -2.64672900 | -0.01994200 |
| H | 3.52535800  | -2.45912900 | 1.03006000  |
| H | 4.47696000  | -3.47881200 | -0.05221000 |
| C | 1.87057000  | -4.30063900 | 0.08661300  |
| H | 0.94209100  | -4.66083600 | -0.36961400 |
| H | 2.58155000  | -5.13325300 | 0.11153600  |
| H | 1.65347400  | -3.99228800 | 1.11232500  |
| C | 2.75425900  | -3.58776000 | -2.16009200 |
| H | 3.49017700  | -4.39863100 | -2.14228600 |
| H | 1.84727900  | -3.95980300 | -2.64374300 |
| H | 3.15302400  | -2.77493400 | -2.77073700 |
| C | -5.13129200 | -1.13990200 | -0.22636700 |
| C | -4.66765200 | 0.03147800  | -0.83827200 |
| C | -6.04811400 | -1.02484200 | 0.82720200  |
| C | -5.06953300 | 1.30195700  | -0.40698400 |
| H | -3.96571000 | -0.04641100 | -1.66064900 |
| C | -6.47610800 | 0.23253800  | 1.25707300  |
| H | -6.43435500 | -1.92203100 | 1.30302800  |
| C | -5.98638700 | 1.39000700  | 0.64916400  |
| H | -7.19749400 | 0.31052600  | 2.06589400  |
| H | -6.32461100 | 2.36584400  | 0.98672300  |
| C | 4.38670900  | -1.41055800 | -0.62711100 |
| C | 3.94865500  | -0.13990500 | -0.23205700 |
| C | 5.37944600  | -1.49843300 | -1.61195300 |
| C | 4.45136500  | 1.03112600  | -0.81433200 |
| H | 3.18290400  | -0.06424100 | 0.52986200  |
| C | 5.90721600  | -0.34150600 | -2.18815900 |
| H | 5.74333700  | -2.47432400 | -1.92128200 |
| C | 5.44354100  | 0.91576500  | -1.79696700 |
| H | 6.68444400  | -0.41998100 | -2.94329600 |
| H | 5.85716100  | 1.81263400  | -2.24992100 |
| C | 3.10179000  | 2.09164700  | 3.49511200  |
| C | 4.24821900  | 1.04392500  | 3.37811600  |
| C | 3.58505800  | -0.34872600 | 3.56798200  |
| H | 3.01691700  | 2.51404600  | 4.50368400  |
| H | 3.18285000  | 2.91998500  | 2.78912400  |
| H | 4.68778200  | 1.09825200  | 2.38047800  |
| H | 5.03448900  | 1.21606300  | 4.11296700  |
| H | 3.96682700  | -1.10230100 | 2.87896300  |
| H | 3.65645100  | -0.72450900 | 4.59192600  |
| N | 2.18061000  | -0.05060100 | 3.26263700  |
| C | 0.94529100  | -0.80071600 | 3.19531100  |

|   |             |             |            |
|---|-------------|-------------|------------|
| O | 0.86393800  | -2.00030100 | 3.38638300 |
| C | -0.01374900 | 0.22486000  | 2.79819000 |
| H | -1.00996100 | 0.24798100  | 3.22565500 |
| C | 1.91371000  | 1.24051400  | 3.23803400 |
| O | 0.66142200  | 1.50904000  | 3.05957100 |

**Rh<sub>2</sub>(esp)<sub>2</sub>**

|    |             |             |             |
|----|-------------|-------------|-------------|
| Rh | -0.04787600 | -0.00022700 | -1.18584100 |
| O  | -1.48444800 | 1.45074200  | -1.08023900 |
| O  | 1.36984900  | 1.47846500  | -1.17353900 |
| O  | 1.37087800  | -1.47786300 | -1.17372100 |
| O  | -1.48347500 | -1.45216900 | -1.08018400 |
| Rh | 0.04786700  | -0.00021900 | 1.18584800  |
| C  | -1.83474300 | -1.89324700 | 0.06055200  |
| O  | -1.37087000 | -1.47787300 | 1.17372500  |
| C  | 1.83475900  | -1.89322400 | -0.06054600 |
| O  | 1.48347900  | -1.45215300 | 1.08018800  |
| C  | -1.83458300 | 1.89297100  | 0.06040000  |
| O  | -1.36985900 | 1.47846700  | 1.17354900  |
| O  | 1.48442400  | 1.45076100  | 1.08024900  |
| C  | 1.83456700  | 1.89297800  | -0.06039300 |
| C  | -2.88135000 | 3.00878000  | 0.11637900  |
| C  | -2.88189300 | -3.00869000 | 0.11663700  |
| C  | 2.88189500  | -3.00867900 | -0.11662600 |
| C  | 2.88135500  | 3.00876800  | -0.11637400 |
| C  | -4.08729700 | 2.51721600  | 0.97776100  |
| H  | -4.83110300 | 3.32096400  | 0.97200000  |
| H  | -3.74056200 | 2.39751300  | 2.00812600  |
| C  | -3.33755400 | 3.40230000  | -1.29322800 |
| H  | -4.09111900 | 4.19340800  | -1.22290900 |
| H  | -2.49838200 | 3.78117200  | -1.88302100 |
| H  | -3.77337500 | 2.55724600  | -1.82949200 |
| C  | -2.23910600 | 4.22471100  | 0.81409300  |
| H  | -2.96828900 | 5.03853200  | 0.88074100  |
| H  | -1.90734400 | 3.97103900  | 1.82406900  |
| H  | -1.37583300 | 4.58781800  | 0.24612800  |
| C  | -4.08770900 | -2.51670400 | 0.97794700  |
| H  | -4.83171400 | -3.32026800 | 0.97228200  |
| H  | -3.74096000 | -2.39696000 | 2.00829900  |
| C  | -2.23999100 | -4.22472100 | 0.81451300  |
| H  | -2.96942000 | -5.03830900 | 0.88131900  |
| H  | -1.37685200 | -4.58818100 | 0.24657300  |
| H  | -1.90812100 | -3.97099100 | 1.82444400  |
| C  | -3.33818800 | -3.40224400 | -1.29293000 |

|   |             |             |             |
|---|-------------|-------------|-------------|
| H | -2.49913900 | -3.78148000 | -1.88265700 |
| H | -4.09203500 | -4.19307500 | -1.22252600 |
| H | -3.77370400 | -2.55710100 | -1.82931200 |
| C | 3.33819000  | -3.40222900 | 1.29294300  |
| H | 4.09202900  | -4.19306800 | 1.22254200  |
| H | 3.77371600  | -2.55708700 | 1.82931800  |
| H | 2.49913900  | -3.78145400 | 1.88267300  |
| C | 2.23997000  | -4.22470800 | -0.81449000 |
| H | 1.90810500  | -3.97098100 | -1.82442300 |
| H | 2.96938500  | -5.03831000 | -0.88128600 |
| H | 1.37682600  | -4.58814400 | -0.24654400 |
| C | 4.08771200  | -2.51671700 | -0.97794500 |
| H | 4.83171300  | -3.32028500 | -0.97226600 |
| H | 3.74096400  | -2.39698800 | -2.00829900 |
| C | 4.08728000  | 2.51720500  | -0.97778300 |
| H | 3.74052700  | 2.39749900  | -2.00814100 |
| H | 4.83108600  | 3.32095400  | -0.97203900 |
| C | 2.23911100  | 4.22471900  | -0.81405700 |
| H | 1.37584800  | 4.58782100  | -0.24607300 |
| H | 2.96829900  | 5.03853600  | -0.88069800 |
| H | 1.90733400  | 3.97106800  | -1.82403400 |
| C | 3.33759000  | 3.40226100  | 1.29323000  |
| H | 4.09117000  | 4.19335400  | 1.22290800  |
| H | 2.49843600  | 3.78114200  | 1.88304100  |
| H | 3.77340400  | 2.55719100  | 1.82947700  |
| C | -4.70983900 | 1.22482200  | 0.50282800  |
| C | -4.21300900 | 0.00027900  | 0.96629300  |
| C | -5.75893500 | 1.21147800  | -0.42595300 |
| C | -4.70998800 | -1.22422600 | 0.50287800  |
| H | -3.41291900 | 0.00024000  | 1.69821300  |
| C | -6.28262700 | 0.00037100  | -0.88179900 |
| H | -6.17132600 | 2.15066200  | -0.78381600 |
| C | -5.75908000 | -1.21078200 | -0.42590800 |
| H | -7.10555300 | 0.00040700  | -1.59121100 |
| H | -6.17159700 | -2.14992700 | -0.78372700 |
| C | 4.70983800  | 1.22481500  | -0.50285800 |
| C | 4.21300700  | 0.00026700  | -0.96631100 |
| C | 5.75894700  | 1.21148000  | 0.42591000  |
| C | 4.70999600  | -1.22423400 | -0.50289600 |
| H | 3.41290700  | 0.00022200  | -1.69821900 |
| C | 6.28264900  | 0.00037700  | 0.88175400  |
| H | 6.17133700  | 2.15066700  | 0.78376400  |
| C | 5.75910100  | -1.21078000 | 0.42587700  |
| H | 7.10558500  | 0.00041900  | 1.59115600  |



|                                        |             |             |             |
|----------------------------------------|-------------|-------------|-------------|
| H                                      | 6.17162500  | -2.14992200 | 0.78369700  |
| <b>Rh<sub>2</sub>(pfb)<sub>4</sub></b> |             |             |             |
| Rh                                     | -0.04962100 | -0.00920700 | -1.20025700 |
| O                                      | 0.72968400  | -1.90140400 | -1.14845700 |
| O                                      | -1.93856700 | -0.77173800 | -1.05061300 |
| O                                      | -0.81700500 | 1.88203700  | -1.12302400 |
| O                                      | 1.84159100  | 0.76838500  | -1.22020200 |
| Rh                                     | 0.04953800  | 0.00921600  | 1.20041600  |
| C                                      | 2.37879500  | 1.01215700  | -0.10757700 |
| O                                      | 1.93845400  | 0.77180700  | 1.05076900  |
| C                                      | -1.02478100 | 2.37612900  | 0.01973800  |
| O                                      | -0.72973400 | 1.90142900  | 1.14860800  |
| C                                      | 1.02475100  | -2.37609600 | -0.01958600 |
| O                                      | 0.81691600  | -1.88203200 | 1.12317700  |
| O                                      | -1.84164800 | -0.76843600 | 1.22035700  |
| C                                      | -2.37888000 | -1.01214400 | 0.10773100  |
| C                                      | 3.46281200  | 3.25920600  | 0.26521300  |
| C                                      | -3.46274500 | -3.25924900 | -0.26511500 |
| C                                      | 3.71245000  | 1.78046900  | -0.13838800 |
| F                                      | 4.58449800  | 1.22977400  | 0.73650400  |
| F                                      | 4.24981200  | 1.74346300  | -1.37809700 |
| F                                      | 2.33527500  | 3.68679100  | -0.36382800 |
| F                                      | 3.25905300  | 3.31436400  | 1.59853200  |
| C                                      | 4.61201900  | 4.23118800  | -0.09094500 |
| F                                      | 4.38969800  | 5.41176300  | 0.49575400  |
| F                                      | 5.77753600  | 3.73803700  | 0.34916400  |
| F                                      | 4.68069900  | 4.40958500  | -1.41359000 |
| C                                      | -1.83082900 | 3.68763400  | 0.01746900  |
| F                                      | -1.70909700 | 4.31767000  | 1.20733000  |
| F                                      | -1.38822700 | 4.50643800  | -0.96301900 |
| C                                      | -3.32877000 | 3.36597800  | -0.23873700 |
| C                                      | -4.30708400 | 4.51481700  | 0.10240500  |
| F                                      | -3.66850400 | 2.28537300  | 0.51370000  |
| F                                      | -3.48167100 | 3.04889700  | -1.54220500 |
| F                                      | -4.39032000 | 4.67785500  | 1.42626700  |
| F                                      | -5.51986800 | 4.21878600  | -0.37638500 |
| F                                      | -3.88432900 | 5.65655100  | -0.45640600 |
| C                                      | -3.71248400 | -1.78054400 | 0.13854000  |
| C                                      | 1.83083200  | -3.68758500 | -0.01735900 |
| F                                      | -4.24983100 | -1.74359800 | 1.37825800  |
| F                                      | -4.58457700 | -1.22988600 | -0.73633000 |
| F                                      | -3.25890400 | -3.31432000 | -1.59842600 |
| F                                      | -2.33521700 | -3.68680000 | 0.36396200  |

|   |             |             |             |
|---|-------------|-------------|-------------|
| C | -4.61190500 | -4.23133200 | 0.09091400  |
| F | -4.68066200 | -4.40982500 | 1.41354200  |
| F | -5.77742900 | -3.73824100 | -0.34924500 |
| F | -4.38945500 | -5.41185300 | -0.49584500 |
| F | 1.70890100  | -4.31772400 | -1.20714600 |
| F | 1.38846300  | -4.50632900 | 0.96327500  |
| C | 3.32881700  | -3.36587700 | 0.23850900  |
| F | 3.66836400  | -2.28528300 | -0.51402400 |
| F | 3.48199000  | -3.04878000 | 1.54194400  |
| C | 4.30707800  | -4.51469900 | -0.10284300 |
| F | 5.51998200  | -4.21861700 | 0.37561400  |
| F | 4.38994200  | -4.67777100 | -1.42672300 |
| F | 3.88451400  | -5.65643800 | 0.45610300  |

**5a**

|    |             |             |             |
|----|-------------|-------------|-------------|
| O  | 3.24767300  | -1.06576100 | 1.69196500  |
| C  | 2.46555200  | -0.44067400 | 0.67658700  |
| C  | 3.96984300  | -2.13946800 | 1.08793000  |
| N  | 3.10813900  | -0.81219100 | -0.58952600 |
| C  | 2.49773900  | 1.11841500  | 0.69642100  |
| C  | 4.09009300  | -1.74145900 | -0.38003900 |
| H  | 3.44376700  | -3.09927000 | 1.19422100  |
| H  | 4.95854800  | -2.22204000 | 1.54541400  |
| C  | 3.27621800  | 0.34775900  | -1.47130200 |
| C  | 0.23370300  | 0.41619500  | 0.47162400  |
| C  | 3.44041400  | 1.50021000  | -0.47008500 |
| H  | 2.87988900  | 1.48219700  | 1.65485400  |
| O  | 4.90544100  | -2.14695900 | -1.19505200 |
| H  | 4.14197000  | 0.18038700  | -2.11427500 |
| H  | 2.38972100  | 0.47489700  | -2.09943400 |
| H  | 4.47542800  | 1.52426600  | -0.11418200 |
| H  | 3.19558500  | 2.47660500  | -0.88933900 |
| O  | -1.08397200 | 0.43908600  | 0.31278200  |
| Si | -2.20600500 | -0.79558500 | -0.08913700 |
| C  | -2.29858400 | -2.00972500 | 1.36798100  |
| H  | -1.43444200 | -2.67674500 | 1.23399300  |
| C  | -1.60186600 | -1.68970900 | -1.65612700 |
| C  | -3.77901000 | 0.21352900  | -0.37666100 |
| H  | -4.54581600 | -0.49670200 | -0.71797300 |
| C  | -4.28915800 | 0.88613900  | 0.90932600  |
| H  | -3.52998500 | 1.54854200  | 1.33990800  |
| H  | -5.17536900 | 1.49785900  | 0.69740200  |
| H  | -4.56996100 | 0.15580700  | 1.67360300  |
| C  | -3.57009200 | 1.26359300  | -1.48394600 |

|   |             |             |             |
|---|-------------|-------------|-------------|
| H | -3.34051100 | 0.80458300  | -2.45010800 |
| H | -4.47576100 | 1.86934500  | -1.61484800 |
| H | -2.74722700 | 1.94019000  | -1.23095700 |
| C | -2.16015000 | -1.34440100 | 2.74758400  |
| H | -2.10199200 | -2.10559000 | 3.53572400  |
| H | -1.26393100 | -0.72149800 | 2.82079100  |
| H | -3.01941700 | -0.70655700 | 2.97516900  |
| C | -3.56850600 | -2.87848000 | 1.30289200  |
| H | -3.58037100 | -3.60793400 | 2.12231400  |
| H | -4.47415500 | -2.26890100 | 1.39691400  |
| H | -3.64192700 | -3.44033200 | 0.36580300  |
| C | -2.77801900 | -2.27834500 | -2.45930700 |
| H | -3.41921900 | -1.48890700 | -2.86537100 |
| H | -2.40733100 | -2.86624800 | -3.30806300 |
| H | -3.40894000 | -2.93824500 | -1.85486900 |
| H | -0.99421500 | -2.53429200 | -1.29985100 |
| C | -0.70739800 | -0.82283700 | -2.55954500 |
| H | -1.23713500 | 0.06163300  | -2.92693600 |
| H | 0.19082100  | -0.47393000 | -2.04291900 |
| H | -0.37923600 | -1.39608000 | -3.43563200 |
| C | 0.98416500  | -0.86034400 | 0.74655800  |
| H | 0.75175600  | -1.65767000 | 0.03570800  |
| H | 0.74555000  | -1.22349300 | 1.75234700  |
| C | 1.05024000  | 1.50452100  | 0.47681600  |
| C | 0.68633000  | 2.91177200  | 0.34218700  |
| O | 1.48783900  | 3.83140700  | 0.46273600  |
| O | -0.62299900 | 3.12442400  | 0.07274100  |
| C | -1.00934500 | 4.50200100  | -0.05302400 |
| H | -2.08011400 | 4.48812300  | -0.25694600 |
| H | -0.80897300 | 5.04976700  | 0.87152400  |
| H | -0.47475600 | 4.98402800  | -0.87596400 |

**4a**

|   |             |             |             |
|---|-------------|-------------|-------------|
| O | -2.89755700 | -0.04572100 | 1.69635100  |
| C | -2.34542600 | -0.54728800 | 0.47126500  |
| C | -4.28864300 | 0.21510800  | 1.52282400  |
| N | -3.49495800 | -0.78151800 | -0.39243400 |
| C | -1.25949400 | 0.36354100  | -0.05129500 |
| C | -1.64659200 | -1.92972500 | 0.56585500  |
| C | -4.66765800 | -0.45170400 | 0.20843300  |
| H | -4.48814600 | 1.29300900  | 1.49038800  |
| H | -4.86342000 | -0.23161200 | 2.34108800  |
| C | -3.30998300 | -1.91824800 | -1.29047700 |
| C | -0.04311200 | -0.23181100 | 0.10062100  |

|    |             |             |             |
|----|-------------|-------------|-------------|
| C  | -1.47806800 | 1.72862900  | -0.52096000 |
| C  | -0.15013200 | -1.62006100 | 0.69432400  |
| C  | -2.01580600 | -2.60380200 | -0.77903900 |
| H  | -2.04954500 | -2.48276100 | 1.41650800  |
| O  | -5.79668300 | -0.68330100 | -0.20662200 |
| H  | -4.19548500 | -2.55660400 | -1.22533300 |
| H  | -3.20582800 | -1.58984100 | -2.32842000 |
| O  | -2.78201100 | 2.08946700  | -0.38803400 |
| O  | -0.63774200 | 2.48390200  | -0.98508200 |
| H  | 0.48199900  | -2.33992200 | 0.16709200  |
| H  | 0.17992500  | -1.59742800 | 1.73873900  |
| H  | -2.15208200 | -3.68127100 | -0.66425500 |
| H  | -1.20891300 | -2.45030300 | -1.50081900 |
| C  | -3.10693200 | 3.41409700  | -0.83520800 |
| H  | -2.55526800 | 4.16472100  | -0.26298500 |
| H  | -4.17836800 | 3.52625900  | -0.66806200 |
| H  | -2.87626900 | 3.53385200  | -1.89700100 |
| O  | 1.11376300  | 0.33153300  | -0.20391400 |
| Si | 2.74376100  | -0.13409300 | 0.07558100  |
| C  | 3.11288100  | -1.69749000 | -0.94470200 |
| H  | 2.84550700  | -2.54048500 | -0.29101300 |
| C  | 2.94369000  | -0.48536800 | 1.93141600  |
| C  | 3.68269100  | 1.38750200  | -0.53641600 |
| H  | 4.75166100  | 1.14541000  | -0.44491000 |
| C  | 3.38154100  | 1.68097100  | -2.01749600 |
| H  | 2.31369300  | 1.86961100  | -2.17052900 |
| H  | 3.92536500  | 2.57451600  | -2.34907800 |
| H  | 3.67565300  | 0.85646500  | -2.67332500 |
| C  | 3.40092400  | 2.63571100  | 0.31827700  |
| H  | 3.73440500  | 2.51327000  | 1.35261300  |
| H  | 3.92456600  | 3.50759700  | -0.09402200 |
| H  | 2.33166000  | 2.87268700  | 0.33277800  |
| C  | 2.26801200  | -1.81442900 | -2.22495000 |
| H  | 2.46445700  | -2.76960600 | -2.72805700 |
| H  | 1.19432700  | -1.76247000 | -2.02318500 |
| H  | 2.50320400  | -1.01772700 | -2.93721500 |
| C  | 4.61249000  | -1.82294400 | -1.27383500 |
| H  | 4.81637200  | -2.77155800 | -1.78584900 |
| H  | 4.94176200  | -1.01750600 | -1.93880200 |
| H  | 5.24370700  | -1.79250200 | -0.37983900 |
| C  | 4.42610000  | -0.47541300 | 2.34839300  |
| H  | 4.87541300  | 0.51388400  | 2.20762400  |
| H  | 4.53061100  | -0.73215600 | 3.40993000  |
| H  | 5.02215100  | -1.19560900 | 1.77887900  |

|   |            |             |            |
|---|------------|-------------|------------|
| H | 2.56960200 | -1.51039600 | 2.06830100 |
| C | 2.11459300 | 0.43662600  | 2.84281300 |
| H | 2.47179200 | 1.46975000  | 2.80310300 |
| H | 1.05332900 | 0.44955900  | 2.57737500 |
| H | 2.18957600 | 0.10662000  | 3.88654900 |

**10**

|    |             |             |             |
|----|-------------|-------------|-------------|
| Rh | 0.09974000  | -0.02922200 | 0.52885300  |
| O  | -1.18832700 | -1.54726600 | 0.98036900  |
| O  | 1.61020600  | -1.17400600 | 1.29550100  |
| O  | 1.40503800  | 1.44489700  | -0.05766800 |
| O  | -1.40846100 | 1.04430700  | -0.32566000 |
| Rh | 0.48339400  | -1.07058500 | -1.57411300 |
| C  | -1.65427800 | 0.89183900  | -1.56371800 |
| O  | -1.03554900 | 0.08434300  | -2.33287500 |
| C  | 1.97656900  | 1.36731200  | -1.19463000 |
| O  | 1.79499400  | 0.42807500  | -2.03300500 |
| C  | -1.37843600 | -2.47939500 | 0.13786900  |
| O  | -0.82584700 | -2.54212100 | -1.00924200 |
| O  | 1.99509800  | -2.14238600 | -0.70537700 |
| C  | 2.23480600  | -1.98292900 | 0.53429600  |
| C  | -2.33011300 | -3.61585200 | 0.51901900  |
| C  | -2.76612900 | 1.73968100  | -2.18637600 |
| C  | 2.94084300  | 2.49763600  | -1.56504600 |
| C  | 3.34297600  | -2.81918300 | 1.17910000  |
| C  | -3.46424500 | -3.69538800 | -0.54993200 |
| H  | -4.14453800 | -4.49256400 | -0.23238700 |
| H  | -3.01492100 | -4.00570800 | -1.49767000 |
| C  | -2.91308800 | -3.39337300 | 1.91943300  |
| H  | -3.58807300 | -4.21929600 | 2.16630800  |
| H  | -2.12066600 | -3.36242900 | 2.67233400  |
| H  | -3.47508100 | -2.45970500 | 1.97968100  |
| C  | -1.52854300 | -4.93267100 | 0.49045700  |
| H  | -2.18660800 | -5.77036500 | 0.74290700  |
| H  | -1.10015700 | -5.11257500 | -0.49879100 |
| H  | -0.71373100 | -4.90806000 | 1.22207200  |
| C  | -3.82710400 | 0.78472000  | -2.81591300 |
| H  | -4.62264200 | 1.41684500  | -3.22412900 |
| H  | -3.35849200 | 0.26333700  | -3.65553300 |
| C  | -2.13887500 | 2.59333100  | -3.30650800 |
| H  | -2.91241000 | 3.20668000  | -3.77991000 |
| H  | -1.37338600 | 3.26511500  | -2.90313700 |
| H  | -1.67711100 | 1.96397500  | -4.07149200 |
| C  | -3.40632600 | 2.65341400  | -1.13479200 |

|   |             |             |             |
|---|-------------|-------------|-------------|
| H | -2.66788600 | 3.34524800  | -0.72391500 |
| H | -4.20359500 | 3.24074800  | -1.60188200 |
| H | -3.83370300 | 2.08526700  | -0.30700400 |
| C | 3.58462700  | 2.24251400  | -2.93264500 |
| H | 4.27652300  | 3.05858200  | -3.16505400 |
| H | 4.14088500  | 1.30335900  | -2.95026900 |
| H | 2.82681900  | 2.20239200  | -3.71978300 |
| C | 2.13409300  | 3.81109900  | -1.60779900 |
| H | 1.68297600  | 4.02920400  | -0.63795800 |
| H | 2.79617000  | 4.64044900  | -1.87676900 |
| H | 1.33721000  | 3.75589300  | -2.35726600 |
| C | 4.02468600  | 2.61438800  | -0.44859100 |
| H | 4.70268600  | 3.42087500  | -0.74695000 |
| H | 3.52778600  | 2.92675400  | 0.47423700  |
| C | 4.36675200  | -1.85304600 | 1.85368600  |
| H | 3.85915400  | -1.34296900 | 2.67715900  |
| H | 5.15474600  | -2.47710200 | 2.28805800  |
| C | 2.69329300  | -3.69255300 | 2.27186600  |
| H | 1.95269100  | -4.37289400 | 1.83779900  |
| H | 3.46141400  | -4.29719800 | 2.76498800  |
| H | 2.19808200  | -3.07592900 | 3.02634200  |
| C | 4.03196800  | -3.71319100 | 0.14214900  |
| H | 4.82187400  | -4.29249400 | 0.63116200  |
| H | 3.32088100  | -4.41343600 | -0.30460900 |
| H | 4.48160300  | -3.12807600 | -0.66249800 |
| C | -4.22733300 | -2.40700900 | -0.75201400 |
| C | -3.76386100 | -1.45906000 | -1.67251400 |
| C | -5.38580000 | -2.11527000 | -0.01992800 |
| C | -4.40464300 | -0.22744900 | -1.85420300 |
| H | -2.87677100 | -1.68099900 | -2.25497500 |
| C | -6.04986500 | -0.90124100 | -0.20312800 |
| H | -5.77375900 | -2.84483900 | 0.68554700  |
| C | -5.55960800 | 0.04156600  | -1.10813800 |
| H | -6.95363200 | -0.68903500 | 0.36121800  |
| H | -6.08123000 | 0.98457100  | -1.24563500 |
| C | 4.96910000  | -0.82830400 | 0.92046500  |
| C | 4.31569500  | 0.39204000  | 0.70615400  |
| C | 6.16237700  | -1.07736000 | 0.22928500  |
| C | 4.80346000  | 1.34411400  | -0.19787900 |
| H | 3.40079600  | 0.60162600  | 1.24849400  |
| C | 6.67602900  | -0.12958200 | -0.65768800 |
| H | 6.69487300  | -2.00972300 | 0.39537900  |
| C | 5.99903600  | 1.07145900  | -0.87614200 |
| H | 7.60948400  | -0.32629300 | -1.17774400 |

|   |             |             |             |
|---|-------------|-------------|-------------|
| H | 6.40463100  | 1.80554900  | -1.56683300 |
| C | -1.99009300 | 4.86508300  | 1.66958300  |
| C | -0.60442900 | 4.78178200  | 1.02151300  |
| C | 0.16447100  | 3.82724900  | 1.94449200  |
| H | -2.03498300 | 5.64846400  | 2.43668500  |
| H | -2.81648600 | 5.02970400  | 0.97541400  |
| H | -0.68278300 | 4.34301000  | 0.02231700  |
| H | -0.10817000 | 5.74993600  | 0.93315100  |
| H | 0.92028200  | 3.23568500  | 1.42986100  |
| H | 0.62933000  | 4.35520800  | 2.78391600  |
| N | -0.89861600 | 2.93263200  | 2.44164800  |
| C | -0.52633300 | 1.79283000  | 3.17201200  |
| O | 0.61473700  | 1.71432100  | 3.63403000  |
| C | -1.45373700 | 0.68849600  | 3.32770900  |
| H | -1.18400700 | -0.15190400 | 3.95372600  |
| C | -2.15788600 | 3.53180600  | 2.37830500  |
| O | -3.18646800 | 3.07844800  | 2.85266600  |
| N | -2.54368400 | 0.52846800  | 2.61590100  |
| N | -3.48353500 | 0.35040500  | 2.01121900  |

**TS7**

|    |             |             |             |
|----|-------------|-------------|-------------|
| Rh | -0.01620400 | -0.10216200 | 0.55383200  |
| O  | -1.35718100 | -1.59088700 | 0.95822600  |
| O  | 1.46391800  | -1.34777900 | 1.24854600  |
| O  | 1.31358000  | 1.33519700  | -0.04739100 |
| O  | -1.45557000 | 1.06761200  | -0.30472200 |
| Rh | 0.32507400  | -1.12189800 | -1.62752100 |
| C  | -1.69870300 | 0.95613200  | -1.55040000 |
| O  | -1.15931900 | 0.11311200  | -2.33420500 |
| C  | 1.85974700  | 1.27946200  | -1.20026300 |
| O  | 1.67177400  | 0.36465300  | -2.05721900 |
| C  | -1.56111400 | -2.50991800 | 0.09624700  |
| O  | -1.02691900 | -2.56034000 | -1.05421300 |
| O  | 1.82185700  | -2.24919500 | -0.79159400 |
| C  | 2.07191000  | -2.13388300 | 0.44505400  |
| C  | -2.53950100 | -3.62994300 | 0.46488200  |
| C  | -2.74296100 | 1.90264000  | -2.15145200 |
| C  | 2.81129100  | 2.43085700  | -1.53799400 |
| C  | 3.18330200  | -2.99481900 | 1.05446500  |
| C  | -3.78359500 | -3.50597900 | -0.47303000 |
| H  | -4.51664500 | -4.24346500 | -0.12881600 |
| H  | -3.47562900 | -3.79464400 | -1.48218900 |
| C  | -2.95875300 | -3.54059300 | 1.93635000  |
| H  | -3.63831800 | -4.36738300 | 2.16845400  |

|   |             |             |             |
|---|-------------|-------------|-------------|
| H | -2.08945600 | -3.61698700 | 2.59613900  |
| H | -3.46738900 | -2.60223500 | 2.15725000  |
| C | -1.85451700 | -4.98423500 | 0.20242700  |
| H | -2.55339200 | -5.79889700 | 0.41836900  |
| H | -1.53069900 | -5.06895100 | -0.83744400 |
| H | -0.97882100 | -5.10849400 | 0.84864900  |
| C | -3.96476200 | 1.04152800  | -2.60470800 |
| H | -4.75068800 | 1.73805000  | -2.91568300 |
| H | -3.66525500 | 0.46865100  | -3.48721700 |
| C | -2.13257500 | 2.58944900  | -3.38725000 |
| H | -2.87522100 | 3.24969800  | -3.84734400 |
| H | -1.26686000 | 3.19887400  | -3.10503300 |
| H | -1.81032200 | 1.85624800  | -4.13021700 |
| C | -3.16821200 | 2.96559300  | -1.13255600 |
| H | -2.31383500 | 3.58832300  | -0.85330000 |
| H | -3.92965100 | 3.61360400  | -1.57955400 |
| H | -3.56826200 | 2.52326000  | -0.22054100 |
| C | 3.42071500  | 2.24828000  | -2.93193400 |
| H | 4.10090200  | 3.07986500  | -3.14369200 |
| H | 3.98194700  | 1.31516200  | -3.00977800 |
| H | 2.64209000  | 2.23927900  | -3.69969300 |
| C | 1.99924500  | 3.74083300  | -1.49038500 |
| H | 1.55020400  | 3.88650300  | -0.50548100 |
| H | 2.65402700  | 4.59159600  | -1.70563900 |
| H | 1.19855300  | 3.73026500  | -2.23802800 |
| C | 3.91935500  | 2.48795800  | -0.43974400 |
| H | 4.60643000  | 3.29381700  | -0.71905400 |
| H | 3.44278400  | 2.76754700  | 0.50365600  |
| C | 4.23469800  | -2.05215300 | 1.72008700  |
| H | 3.75325600  | -1.55186400 | 2.56510300  |
| H | 5.02620700  | -2.69262900 | 2.12370900  |
| C | 2.55197900  | -3.88056500 | 2.14706200  |
| H | 1.79087700  | -4.54243300 | 1.71989700  |
| H | 3.32387200  | -4.50523200 | 2.60849600  |
| H | 2.08446300  | -3.27291600 | 2.92606200  |
| C | 3.83701100  | -3.87825100 | -0.01430200 |
| H | 4.63136700  | -4.47588300 | 0.44473500  |
| H | 3.10674000  | -4.56146200 | -0.45662500 |
| H | 4.27376300  | -3.28400000 | -0.81918800 |
| C | -4.40202000 | -2.12831000 | -0.51837800 |
| C | -3.98410000 | -1.21514500 | -1.49374300 |
| C | -5.36881300 | -1.71762800 | 0.40924600  |
| C | -4.48778800 | 0.08990600  | -1.55399400 |
| H | -3.24052400 | -1.52546900 | -2.22053000 |



|   |             |             |             |
|---|-------------|-------------|-------------|
| C | -5.88809900 | -0.42268400 | 0.35972200  |
| H | -5.72433500 | -2.41624900 | 1.16117400  |
| C | -5.45051700 | 0.47807800  | -0.61331900 |
| H | -6.64507400 | -0.11698200 | 1.07666100  |
| H | -5.86667600 | 1.48085500  | -0.65121400 |
| C | 4.82656600  | -1.01498200 | 0.79353000  |
| C | 4.19658400  | 0.22660100  | 0.63931700  |
| C | 5.98729700  | -1.27264300 | 0.05159300  |
| C | 4.67655600  | 1.19341300  | -0.25409900 |
| H | 3.30754400  | 0.44431900  | 1.22045800  |
| C | 6.49242000  | -0.31195300 | -0.82618900 |
| H | 6.50157900  | -2.22227800 | 0.17058100  |
| C | 5.83941700  | 0.91177800  | -0.98360900 |
| H | 7.40055300  | -0.51624500 | -1.38667300 |
| H | 6.23875500  | 1.65577300  | -1.66736900 |
| C | -2.01654900 | 4.81466400  | 1.84346600  |
| C | -0.65472700 | 5.37548400  | 1.42787100  |
| C | 0.33862000  | 4.50781000  | 2.20864200  |
| H | -2.37374600 | 5.26912400  | 2.77669100  |
| H | -2.80763400 | 4.91198100  | 1.09890800  |
| H | -0.50185300 | 5.22920400  | 0.35395600  |
| H | -0.53328100 | 6.43597800  | 1.65403200  |
| H | 1.29495400  | 4.37147100  | 1.70660400  |
| H | 0.52397400  | 4.89555900  | 3.21622000  |
| N | -0.36048100 | 3.20725500  | 2.30162400  |
| C | 0.38162300  | 2.08771100  | 2.61923600  |
| O | 1.58047100  | 2.19765800  | 2.88389400  |
| C | -0.04557000 | 0.67690800  | 2.42722500  |
| H | 0.41224800  | 0.04928800  | 3.19397700  |
| C | -1.74852800 | 3.35039100  | 2.13582500  |
| O | -2.57812600 | 2.46989100  | 2.25454500  |
| N | -1.75131200 | 0.33794500  | 3.18691200  |
| N | -2.58536300 | -0.38620900 | 3.28577300  |

## 11

|    |             |             |             |
|----|-------------|-------------|-------------|
| Rh | -0.01893600 | 0.00567300  | 0.56736000  |
| O  | -1.50570400 | -1.32359500 | 1.06491300  |
| O  | 1.33498800  | -1.39942800 | 1.19652400  |
| O  | 1.45067200  | 1.28756600  | -0.09460600 |
| O  | -1.38443800 | 1.33011800  | -0.21357200 |
| Rh | 0.07203700  | -1.04624300 | -1.61788400 |
| C  | -1.73389300 | 1.22546200  | -1.43215600 |
| O  | -1.30897600 | 0.34740400  | -2.24899700 |
| C  | 1.92579200  | 1.15424900  | -1.27098500 |

|   |             |             |             |
|---|-------------|-------------|-------------|
| O | 1.56721400  | 0.27487800  | -2.11146900 |
| C | -1.86330100 | -2.20378500 | 0.21800900  |
| O | -1.40198300 | -2.32214700 | -0.96225200 |
| O | 1.45558800  | -2.35324100 | -0.85021100 |
| C | 1.77840400  | -2.26732700 | 0.37485200  |
| C | -2.93903900 | -3.21474900 | 0.63605900  |
| C | -2.75148100 | 2.23848300  | -1.97255300 |
| C | 3.01526600  | 2.15379300  | -1.67677000 |
| C | 2.78382700  | -3.27953100 | 0.93585400  |
| C | -4.14811200 | -3.08084200 | -0.34210300 |
| H | -4.92119600 | -3.77411800 | 0.00643300  |
| H | -3.82149800 | -3.42172200 | -1.32865300 |
| C | -3.38651800 | -2.99010300 | 2.08379100  |
| H | -4.12754100 | -3.74923400 | 2.35639600  |
| H | -2.54186800 | -3.07184400 | 2.77342800  |
| H | -3.83627300 | -2.00652400 | 2.22012000  |
| C | -2.34232100 | -4.62876800 | 0.49331900  |
| H | -3.09470800 | -5.37822400 | 0.76070600  |
| H | -2.01200000 | -4.81643500 | -0.53129700 |
| H | -1.48390300 | -4.75721600 | 1.16182500  |
| C | -3.99193400 | 1.45952200  | -2.51150200 |
| H | -4.71616000 | 2.20700100  | -2.85274200 |
| H | -3.67352100 | 0.88776000  | -3.38777700 |
| C | -2.09495100 | 2.99166000  | -3.14613700 |
| H | -2.80186600 | 3.71436800  | -3.56723300 |
| H | -1.20923100 | 3.54119800  | -2.80830200 |
| H | -1.79037900 | 2.30152900  | -3.93686100 |
| C | -3.16572000 | 3.23814100  | -0.88686800 |
| H | -2.30276000 | 3.81402700  | -0.54015600 |
| H | -3.90013000 | 3.93957200  | -1.29704800 |
| H | -3.60499600 | 2.73910300  | -0.02248500 |
| C | 3.49577000  | 1.89193400  | -3.10829400 |
| H | 4.27402600  | 2.61644100  | -3.37068000 |
| H | 3.90817800  | 0.88742400  | -3.21904000 |
| H | 2.67386100  | 1.99925100  | -3.82150400 |
| C | 2.41879800  | 3.57152700  | -1.57978600 |
| H | 2.06317000  | 3.77701700  | -0.56782600 |
| H | 3.17911800  | 4.31528400  | -1.84042600 |
| H | 1.57759300  | 3.68955800  | -2.27167100 |
| C | 4.19467900  | 2.03824700  | -0.66141300 |
| H | 4.97234300  | 2.73588700  | -0.99106700 |
| H | 3.83505300  | 2.37971300  | 0.31333100  |
| C | 4.00423200  | -2.49666600 | 1.51384600  |
| H | 3.65706000  | -1.92692500 | 2.37978000  |

|   |             |             |             |
|---|-------------|-------------|-------------|
| H | 4.72248700  | -3.24165900 | 1.87313400  |
| C | 2.09895100  | -4.04273600 | 2.08678400  |
| H | 1.22310800  | -4.59116900 | 1.72294900  |
| H | 2.79693500  | -4.76708700 | 2.51978400  |
| H | 1.77456300  | -3.35773100 | 2.87417700  |
| C | 3.22860600  | -4.26862300 | -0.14743500 |
| H | 3.94886700  | -4.97601100 | 0.27724100  |
| H | 2.37643700  | -4.83728500 | -0.52993700 |
| H | 3.69970900  | -3.76083800 | -0.99136000 |
| C | -4.71678600 | -1.68518200 | -0.46043000 |
| C | -4.17563300 | -0.79016800 | -1.39163600 |
| C | -5.77191100 | -1.24616300 | 0.35062700  |
| C | -4.64053600 | 0.52506700  | -1.51569200 |
| H | -3.36753600 | -1.12383800 | -2.03235200 |
| C | -6.26078900 | 0.05578200  | 0.22894800  |
| H | -6.21858800 | -1.92935300 | 1.06790300  |
| C | -5.69761200 | 0.93880800  | -0.69426700 |
| H | -7.08731700 | 0.38267000  | 0.85397700  |
| H | -6.08561700 | 1.94962500  | -0.78548900 |
| C | 4.67104200  | -1.55965800 | 0.53352100  |
| C | 4.21162400  | -0.24189000 | 0.40919200  |
| C | 5.73002600  | -1.98049600 | -0.28211900 |
| C | 4.76543500  | 0.64623200  | -0.52138800 |
| H | 3.40693400  | 0.09734900  | 1.05181000  |
| C | 6.30551900  | -1.10156300 | -1.20165000 |
| H | 6.11165000  | -2.99343800 | -0.18754600 |
| C | 5.82460900  | 0.20319900  | -1.32505400 |
| H | 7.13561800  | -1.43262800 | -1.81976300 |
| H | 6.27929800  | 0.88428600  | -2.03928300 |
| N | -3.49407100 | 0.41886000  | 2.87936000  |
| N | -3.82565000 | 1.20214100  | 2.17541300  |
| C | -0.53803100 | 4.57011500  | 2.17156700  |
| C | 0.88718200  | 5.14362100  | 1.90587100  |
| C | 1.89739700  | 4.07481700  | 2.41479600  |
| H | -1.00193000 | 4.97806600  | 3.07704700  |
| H | -1.23349200 | 4.71573600  | 1.34209800  |
| H | 1.02236000  | 5.28887700  | 0.83232700  |
| H | 1.03830200  | 6.10145900  | 2.40353000  |
| H | 2.72347500  | 3.90246500  | 1.72442100  |
| H | 2.29655900  | 4.29788500  | 3.40746600  |
| N | 1.05354000  | 2.87861000  | 2.49225300  |
| C | 1.24793800  | 1.48237800  | 2.79423100  |
| O | 2.32689700  | 0.99485300  | 3.08592300  |
| C | -0.08463000 | 0.92423500  | 2.57628500  |

|   |             |            |            |
|---|-------------|------------|------------|
| H | -0.49257100 | 0.19029000 | 3.26244400 |
| C | -0.23373600 | 3.13440400 | 2.38496500 |
| O | -0.98262100 | 2.08949900 | 2.51085500 |

**12**

|    |             |             |             |
|----|-------------|-------------|-------------|
| Rh | 0.04176600  | -0.00399800 | -0.44210400 |
| O  | 1.46370800  | -1.13197300 | -1.39342600 |
| O  | -1.40128800 | -1.10640700 | -1.39181300 |
| O  | -1.34190000 | 1.04387800  | 0.65466100  |
| O  | 1.49135700  | 1.00199700  | 0.60900900  |
| Rh | 0.01631300  | -1.66003000 | 1.32370300  |
| C  | 1.87436200  | 0.54135800  | 1.73354500  |
| O  | 1.46093400  | -0.53646000 | 2.26671300  |
| C  | -1.76173200 | 0.57740500  | 1.76351800  |
| O  | -1.40230400 | -0.52534700 | 2.27968800  |
| C  | 1.84915500  | -2.22461100 | -0.86679500 |
| O  | 1.43246600  | -2.69540600 | 0.23939300  |
| O  | -1.45980200 | -2.63330100 | 0.27476500  |
| C  | -1.84535000 | -2.16866000 | -0.84200600 |
| C  | 2.90024000  | -3.04956400 | -1.61952500 |
| C  | 2.92019400  | 1.34158400  | 2.51901200  |
| C  | -2.77915700 | 1.44779300  | 2.50903400  |
| C  | -2.92776600 | -2.92939700 | -1.61612300 |
| C  | 4.14091500  | -3.23805000 | -0.69109900 |
| H  | 4.88669700  | -3.80041900 | -1.26328500 |
| H  | 3.83721200  | -3.86018600 | 0.15549000  |
| C  | 3.29979800  | -2.36783700 | -2.93293600 |
| H  | 4.05789100  | -2.97246500 | -3.44197400 |
| H  | 2.43784100  | -2.26911700 | -3.59863800 |
| H  | 3.71052100  | -1.37088000 | -2.76261600 |
| C  | 2.29320900  | -4.43487600 | -1.91690900 |
| H  | 3.02759500  | -5.05822400 | -2.43780100 |
| H  | 1.99809100  | -4.94201600 | -0.99482600 |
| H  | 1.41025600  | -4.34270600 | -2.55869900 |
| C  | 4.15979300  | 0.42518800  | 2.76210600  |
| H  | 4.90916000  | 1.02928500  | 3.28489800  |
| H  | 3.85605700  | -0.37967100 | 3.43709000  |
| C  | 2.30597700  | 1.71927500  | 3.88125100  |
| H  | 3.03755500  | 2.27458600  | 4.47762600  |
| H  | 1.42453500  | 2.35607900  | 3.74657900  |
| H  | 2.00546700  | 0.82884600  | 4.43887600  |
| C  | 3.32218900  | 2.61464800  | 1.76676800  |
| H  | 2.45859100  | 3.26965200  | 1.62448700  |
| H  | 4.07322000  | 3.16072300  | 2.34733200  |

|   |             |             |             |
|---|-------------|-------------|-------------|
| H | 3.74269200  | 2.38751100  | 0.78557400  |
| C | -3.23062900 | 0.77727600  | 3.81061100  |
| H | -3.96550800 | 1.41408400  | 4.31438800  |
| H | -3.68768400 | -0.19656000 | 3.62543700  |
| H | -2.38456000 | 0.63011300  | 4.48756500  |
| C | -2.10094900 | 2.79608000  | 2.82543400  |
| H | -1.76436200 | 3.28962000  | 1.90989600  |
| H | -2.80696200 | 3.45698600  | 3.33920800  |
| H | -1.23383000 | 2.65174200  | 3.47932200  |
| C | -3.99024500 | 1.70985300  | 1.55944800  |
| H | -4.71557100 | 2.30916300  | 2.12073600  |
| H | -3.63288100 | 2.31390900  | 0.72132700  |
| C | -4.12152400 | -1.96079000 | -1.88596900 |
| H | -3.77280300 | -1.17659400 | -2.56348700 |
| H | -4.88848500 | -2.53760800 | -2.41426800 |
| C | -2.32754600 | -3.36043100 | -2.96938200 |
| H | -1.47488900 | -4.03206700 | -2.82090200 |
| H | -3.08195400 | -3.89481700 | -3.55640000 |
| H | -1.98881000 | -2.49428900 | -3.54358300 |
| C | -3.38941200 | -4.16744200 | -0.83891300 |
| H | -4.16509400 | -4.68854800 | -1.41004800 |
| H | -2.55864700 | -4.86021200 | -0.67915200 |
| H | -3.79935900 | -3.90338500 | 0.13788000  |
| C | 4.74083200  | -1.95003300 | -0.17683800 |
| C | 4.26894400  | -1.39019800 | 1.01673200  |
| C | 5.74663600  | -1.27327400 | -0.88004000 |
| C | 4.75098700  | -0.16889400 | 1.50464400  |
| H | 3.49838300  | -1.91215000 | 1.57272000  |
| C | 6.25362400  | -0.06476300 | -0.39894000 |
| H | 6.14076900  | -1.70050000 | -1.79789900 |
| C | 5.75664500  | 0.48805300  | 0.78291800  |
| H | 7.04406400  | 0.44463700  | -0.94331900 |
| H | 6.15925000  | 1.42644000  | 1.15438300  |
| C | -4.70730400 | -1.32871200 | -0.64482800 |
| C | -4.17717700 | -0.12764600 | -0.15539400 |
| C | -5.75753500 | -1.93385100 | 0.05867200  |
| C | -4.64633400 | 0.45590300  | 1.02889200  |
| H | -3.37780600 | 0.36100800  | -0.70152600 |
| C | -6.25307900 | -1.35235800 | 1.22701300  |
| H | -6.19417000 | -2.85588900 | -0.31536400 |
| C | -5.69767000 | -0.16792600 | 1.71417200  |
| H | -7.07696300 | -1.82193300 | 1.75747300  |
| H | -6.08667200 | 0.28041200  | 2.62429000  |
| C | 1.90491100  | 4.44598600  | -1.13161000 |

|   |             |            |             |
|---|-------------|------------|-------------|
| C | 0.87427900  | 5.26967000 | -0.30592900 |
| C | -0.52427700 | 4.75221000 | -0.73598900 |
| H | 2.18044500  | 4.94388700 | -2.06811000 |
| H | 2.81447100  | 4.19244500 | -0.58628000 |
| H | 1.02175300  | 5.06998800 | 0.75821200  |
| H | 0.97588600  | 6.34152900 | -0.47581100 |
| H | -1.23835100 | 4.68941900 | 0.08526600  |
| H | -0.95923800 | 5.32861600 | -1.55623200 |
| N | -0.19537800 | 3.41268200 | -1.23149300 |
| C | -0.92538400 | 2.34039400 | -1.83413800 |
| O | -2.15043300 | 2.32442700 | -1.95785900 |
| C | 0.11593200  | 1.38999300 | -2.15138000 |
| H | 0.09775700  | 0.78841300 | -3.05175300 |
| C | 1.09186500  | 3.25983100 | -1.48468200 |
| O | 1.37070700  | 2.13645400 | -2.05983200 |
| O | 0.27557700  | 4.34863700 | -4.01230500 |
| H | 0.40066300  | 3.56765200 | -4.56864000 |
| H | -0.69844500 | 4.46463200 | -3.97463600 |
| O | -2.48267400 | 4.47861900 | -3.68338400 |
| H | -2.81682500 | 5.25459000 | -3.21094400 |
| H | -2.57813500 | 3.73675300 | -3.05233600 |

**TS8**

|    |             |             |             |
|----|-------------|-------------|-------------|
| Rh | 0.00060500  | -0.03743000 | -0.43670900 |
| O  | 1.33478400  | -1.26908900 | -1.39275700 |
| O  | -1.52167300 | -0.96808500 | -1.46381200 |
| O  | -1.31109000 | 1.08788400  | 0.67064500  |
| O  | 1.48605300  | 0.78541100  | 0.70061500  |
| Rh | -0.23066400 | -1.76391700 | 1.27755500  |
| C  | 1.79268700  | 0.26113900  | 1.81824600  |
| O  | 1.28509800  | -0.79864400 | 2.30462800  |
| C  | -1.81329900 | 0.61888800  | 1.74329800  |
| O  | -1.57904300 | -0.52992000 | 2.22766400  |
| C  | 1.61271500  | -2.40414200 | -0.89002700 |
| O  | 1.13190300  | -2.87436200 | 0.18975900  |
| O  | -1.75790400 | -2.54922700 | 0.13783500  |
| C  | -2.08028000 | -1.99760000 | -0.95836800 |
| C  | 2.61675700  | -3.28703800 | -1.64492800 |
| C  | 2.87283300  | 0.96311200  | 2.65125100  |
| C  | -2.77019700 | 1.55596800  | 2.49138800  |
| C  | -3.22918800 | -2.60584400 | -1.77428000 |
| C  | 3.82890300  | -3.57504600 | -0.70495400 |
| H  | 4.54692700  | -4.16979700 | -1.28031500 |
| H  | 3.47336200  | -4.19766600 | 0.12082800  |

|   |             |             |             |
|---|-------------|-------------|-------------|
| C | 3.08256200  | -2.61081600 | -2.93968100 |
| H | 3.80075200  | -3.25969800 | -3.45260400 |
| H | 2.23937600  | -2.43470700 | -3.61344400 |
| H | 3.56274200  | -1.65021500 | -2.74427500 |
| C | 1.92501100  | -4.62306100 | -1.97804100 |
| H | 2.62460100  | -5.28599100 | -2.49820800 |
| H | 1.57946800  | -5.12478700 | -1.07073600 |
| H | 1.06156600  | -4.46097200 | -2.63259600 |
| C | 4.05355200  | -0.03405100 | 2.86563600  |
| H | 4.83649300  | 0.50329500  | 3.41177700  |
| H | 3.69822400  | -0.84250500 | 3.51079900  |
| C | 2.26715400  | 1.31789200  | 4.02261600  |
| H | 3.02266800  | 1.80209400  | 4.65065800  |
| H | 1.42644200  | 2.01109100  | 3.90748900  |
| H | 1.90695800  | 0.42403300  | 4.53799300  |
| C | 3.35547900  | 2.24092500  | 1.95463500  |
| H | 2.53202900  | 2.94942800  | 1.83222700  |
| H | 4.13217800  | 2.71829300  | 2.56194100  |
| H | 3.76592900  | 2.03212400  | 0.96571300  |
| C | -3.38006200 | 0.86254000  | 3.71384200  |
| H | -4.06217800 | 1.55087400  | 4.22426200  |
| H | -3.93986300 | -0.03161300 | 3.43243400  |
| H | -2.60166600 | 0.56502300  | 4.42171100  |
| C | -1.95616400 | 2.78629900  | 2.94120000  |
| H | -1.50928500 | 3.29439000  | 2.08240200  |
| H | -2.60661200 | 3.49392400  | 3.46635500  |
| H | -1.15237400 | 2.49254600  | 3.62516100  |
| C | -3.87884200 | 2.02806700  | 1.50019000  |
| H | -4.55009300 | 2.69087500  | 2.05742600  |
| H | -3.39734300 | 2.62046900  | 0.71752700  |
| C | -4.26789300 | -1.48633900 | -2.09341700 |
| H | -3.77795700 | -0.74264400 | -2.72815100 |
| H | -5.06730900 | -1.94856300 | -2.68313400 |
| C | -2.63711300 | -3.11923000 | -3.10269500 |
| H | -1.88595500 | -3.89533600 | -2.92005800 |
| H | -3.43006100 | -3.55365600 | -3.72088600 |
| H | -2.16499100 | -2.30734700 | -3.66234500 |
| C | -3.88784600 | -3.76612300 | -1.02039700 |
| H | -4.70541000 | -4.17629100 | -1.62280900 |
| H | -3.16771800 | -4.56640400 | -0.83020000 |
| H | -4.29608300 | -3.44385900 | -0.06035900 |
| C | 4.50291800  | -2.34254800 | -0.14758400 |
| C | 4.05344600  | -1.78816200 | 1.05701900  |
| C | 5.56187600  | -1.71463300 | -0.81750200 |

|   |             |             |             |
|---|-------------|-------------|-------------|
| C | 4.61409600  | -0.62107200 | 1.59123100  |
| H | 3.23736000  | -2.26904300 | 1.58461800  |
| C | 6.14309100  | -0.55891900 | -0.29265000 |
| H | 5.93838400  | -2.13914000 | -1.74406000 |
| C | 5.67077600  | -0.01170000 | 0.90186700  |
| H | 6.97268800  | -0.08731900 | -0.81237800 |
| H | 6.13188700  | 0.88450600  | 1.30808400  |
| C | -4.85120100 | -0.80520900 | -0.87635900 |
| C | -4.19245200 | 0.28832500  | -0.29903400 |
| C | -6.03381500 | -1.26495000 | -0.28110700 |
| C | -4.66596100 | 0.90303500  | 0.86788500  |
| H | -3.28401400 | 0.66172300  | -0.75728000 |
| C | -6.53318500 | -0.64833700 | 0.86732300  |
| H | -6.56717500 | -2.10167800 | -0.72399100 |
| C | -5.85120600 | 0.42514800  | 1.44308400  |
| H | -7.45763700 | -1.00416800 | 1.31401500  |
| H | -6.24325800 | 0.90036800  | 2.33829900  |
| C | 2.55198600  | 4.14600500  | -1.23066300 |
| C | 1.85656600  | 5.17953800  | -0.33522900 |
| C | 0.33895900  | 4.81879400  | -0.44142000 |
| H | 1.80353400  | 4.72343700  | -2.79374300 |
| H | 3.62442500  | 4.06335600  | -1.34424500 |
| H | 2.18988200  | 5.09029000  | 0.70564600  |
| H | 2.03608900  | 6.21208200  | -0.64791000 |
| H | -0.17231600 | 4.82240100  | 0.52191700  |
| H | -0.20079800 | 5.48830200  | -1.11853200 |
| N | 0.38424500  | 3.45996800  | -0.99241400 |
| C | -0.51668600 | 2.60552000  | -1.58637900 |
| O | -1.72494200 | 2.87579300  | -1.76639600 |
| C | 0.26988000  | 1.43753200  | -1.97483300 |
| H | 0.06040600  | 0.99462100  | -2.94639800 |
| C | 1.66700200  | 3.11394700  | -1.38023200 |
| O | 1.66859900  | 1.92903200  | -1.97216700 |
| O | -1.16255800 | 4.75166700  | -3.49416000 |
| H | -1.50378600 | 4.08625400  | -2.80855800 |
| H | -1.48265000 | 4.45249200  | -4.36318000 |
| O | 1.23063300  | 5.09976700  | -3.56973700 |
| H | 0.06763400  | 4.90542400  | -3.50649100 |
| H | 1.42143100  | 6.05157100  | -3.64607400 |

### 13

|    |            |             |             |
|----|------------|-------------|-------------|
| Rh | 0.26237100 | -1.20211100 | -1.57080100 |
| Rh | 0.12585700 | -0.21020800 | 0.65352300  |
| O  | 1.70401000 | -1.39667300 | 1.20566600  |



|   |             |             |             |
|---|-------------|-------------|-------------|
| C | 2.19716300  | -2.21338800 | 0.36270000  |
| O | 1.81750400  | -2.34854800 | -0.84336100 |
| C | 3.34200600  | -3.12138600 | 0.83138700  |
| C | 3.70977800  | -2.83948400 | 2.29241800  |
| C | 2.87360100  | -4.58310200 | 0.68698500  |
| C | 4.57078700  | -2.89771600 | -0.10364200 |
| H | 4.53158600  | -3.49704200 | 2.59554900  |
| H | 4.02467500  | -1.80431100 | 2.43839800  |
| H | 2.85891200  | -3.02945000 | 2.95244800  |
| H | 2.60298900  | -4.80868000 | -0.34760200 |
| H | 3.67575400  | -5.26268100 | 0.99365900  |
| H | 2.00268100  | -4.77751600 | 1.32242500  |
| H | 5.37833000  | -3.53793200 | 0.26756200  |
| H | 4.30294600  | -3.25198900 | -1.10310000 |
| C | 5.03857100  | -1.46352300 | -0.18695700 |
| C | 4.46353800  | -0.59592900 | -1.12376100 |
| C | 6.01882600  | -0.95838400 | 0.67773500  |
| C | 4.81863800  | 0.75651000  | -1.19683500 |
| H | 3.71012900  | -0.97928200 | -1.80226400 |
| C | 6.39948200  | 0.38296600  | 0.60671000  |
| H | 6.49053700  | -1.61913000 | 1.39990300  |
| C | 4.12376800  | 1.66418200  | -2.18453600 |
| C | 5.80038500  | 1.23789100  | -0.32018500 |
| H | 7.16969500  | 0.76230500  | 1.27270500  |
| C | 2.81267200  | 2.31991800  | -1.65180600 |
| H | 3.87517800  | 1.09849700  | -3.08697100 |
| H | 4.79211900  | 2.48000200  | -2.48084700 |
| H | 6.10307000  | 2.28009000  | -0.37252200 |
| C | 1.85128700  | 1.20697300  | -1.20812100 |
| C | 2.14857100  | 3.09085000  | -2.80971900 |
| C | 3.11563700  | 3.28455700  | -0.49967600 |
| O | 1.54428600  | 0.33303500  | -2.08032000 |
| O | 1.42501100  | 1.23707300  | -0.00976000 |
| H | 1.23682300  | 3.59264300  | -2.47046800 |
| H | 2.83218800  | 3.86039800  | -3.18368900 |
| H | 1.89270100  | 2.42161800  | -3.63499600 |
| H | 3.81393900  | 4.05457400  | -0.84481600 |
| H | 2.20539900  | 3.78059000  | -0.15633100 |
| H | 3.55967000  | 2.77061300  | 0.35434300  |
| O | -1.03195600 | -2.65937000 | -0.93178300 |
| C | -1.43825500 | -2.64882000 | 0.26930500  |
| O | -1.13644300 | -1.77043900 | 1.14442600  |
| C | -2.36197600 | -3.78293300 | 0.73299000  |
| C | -3.67647400 | -3.16288600 | 1.29780700  |

|   |             |             |             |
|---|-------------|-------------|-------------|
| C | -1.64493100 | -4.53933200 | 1.86898600  |
| C | -2.66766300 | -4.74886500 | -0.41763200 |
| H | -4.32277800 | -3.99492000 | 1.59748700  |
| H | -3.42406600 | -2.60178400 | 2.20227600  |
| C | -4.40829600 | -2.25820500 | 0.33353400  |
| H | -2.28146500 | -5.35198800 | 2.23460800  |
| H | -0.70685100 | -4.97820500 | 1.51205600  |
| H | -1.41734000 | -3.87199000 | 2.70420200  |
| H | -1.75021500 | -5.20491200 | -0.79931400 |
| H | -3.32343000 | -5.54850800 | -0.05713400 |
| H | -3.16462800 | -4.24477800 | -1.24894200 |
| C | -4.06112500 | -0.90425800 | 0.24939700  |
| C | -5.41697800 | -2.74160100 | -0.51029000 |
| C | -4.67448700 | -0.03526600 | -0.66085000 |
| H | -3.28163400 | -0.52426800 | 0.89775000  |
| C | -6.05092800 | -1.88675700 | -1.41419600 |
| H | -5.71215400 | -3.78561500 | -0.45151600 |
| C | -4.22903100 | 1.40595200  | -0.74629500 |
| C | -5.68132900 | -0.54280000 | -1.49293500 |
| H | -6.84015000 | -2.26851900 | -2.05598200 |
| C | -3.02096400 | 1.66021900  | -1.69875100 |
| H | -5.05357400 | 2.03311500  | -1.10182100 |
| H | -3.95590100 | 1.76442300  | 0.25008600  |
| H | -6.18177700 | 0.11820500  | -2.19519700 |
| C | -1.83907400 | 0.78354000  | -1.25934100 |
| C | -3.40589600 | 1.37338800  | -3.15405300 |
| C | -2.59215300 | 3.13364000  | -1.55608500 |
| O | -1.33514900 | -0.01498300 | -2.10558900 |
| O | -1.44093800 | 0.93682900  | -0.05574000 |
| H | -4.25126400 | 2.00797500  | -3.44033300 |
| H | -2.57252000 | 1.58869400  | -3.82843300 |
| H | -3.69336100 | 0.33001100  | -3.29751000 |
| H | -3.41045100 | 3.79323200  | -1.86277500 |
| H | -2.32892100 | 3.36974600  | -0.52243600 |
| H | -1.73162500 | 3.33912700  | -2.20243100 |
| H | -2.08690900 | 5.39675100  | 1.77323900  |
| O | -1.67208600 | 6.64024500  | 0.94793500  |
| H | -1.12902200 | 7.27679100  | 1.43643300  |
| H | -1.09575800 | 6.28946300  | 0.22351900  |
| O | -0.10580700 | 5.34799000  | -0.82576200 |
| H | -0.56151200 | 5.15131100  | -1.65862700 |
| H | -0.06215700 | 4.49742300  | -0.35622700 |
| C | 0.02404400  | 0.52586000  | 2.76561000  |
| C | -1.36057400 | 0.24642600  | 3.39769400  |

|   |             |             |            |
|---|-------------|-------------|------------|
| C | -2.25481400 | 1.43965100  | 2.95194700 |
| H | 0.90105100  | 0.06480000  | 3.21124300 |
| H | -1.78308800 | -0.70272000 | 3.06821800 |
| H | -1.28930200 | 0.23294300  | 4.49287900 |
| H | -2.79603100 | 1.22831400  | 2.02947600 |
| H | -2.94940500 | 1.78114600  | 3.72029900 |
| N | -1.23880500 | 2.46261500  | 2.67784800 |
| C | -1.18180000 | 3.79033000  | 2.28612000 |
| O | -2.29216000 | 4.50164200  | 2.20952500 |
| C | 0.13985700  | 4.05687300  | 2.06095800 |
| H | 0.70693700  | 4.95605500  | 1.90064300 |
| C | -0.00328900 | 1.93070900  | 2.61483000 |
| O | 0.87621700  | 2.87402100  | 2.30660900 |

**TS9**

|    |            |             |             |
|----|------------|-------------|-------------|
| Rh | 0.27715600 | -1.12480600 | -1.58026000 |
| Rh | 0.13148600 | -0.15652500 | 0.64728400  |
| O  | 1.72499200 | -1.32870300 | 1.18474000  |
| C  | 2.21586800 | -2.14444000 | 0.33978900  |
| O  | 1.83429200 | -2.27350600 | -0.86658900 |
| C  | 3.35592700 | -3.05962900 | 0.80472400  |
| C  | 3.73050800 | -2.77902700 | 2.26428700  |
| C  | 2.87526600 | -4.51777000 | 0.66320300  |
| C  | 4.58289400 | -2.84568100 | -0.13465600 |
| H  | 4.54965100 | -3.44117100 | 2.56442600  |
| H  | 4.05206100 | -1.74565400 | 2.40862400  |
| H  | 2.88104900 | -2.96397800 | 2.92751500  |
| H  | 2.59989000 | -4.74253700 | -0.37033000 |
| H  | 3.67323700 | -5.20293500 | 0.96822200  |
| H  | 2.00497100 | -4.70465400 | 1.30165300  |
| H  | 5.38662100 | -3.49244500 | 0.23321400  |
| H  | 4.30880300 | -3.19696200 | -1.13351300 |
| C  | 5.06036400 | -1.41482000 | -0.21678000 |
| C  | 4.47685000 | -0.53726900 | -1.13893900 |
| C  | 6.05629000 | -0.92192200 | 0.63679100  |
| C  | 4.83855700 | 0.81334400  | -1.20723100 |
| H  | 3.71242000 | -0.91124900 | -1.81012900 |
| C  | 6.44430500 | 0.41755000  | 0.56928100  |
| H  | 6.53401800 | -1.59064900 | 1.34758600  |
| C  | 4.13462900 | 1.73142400  | -2.17819300 |
| C  | 5.83635800 | 1.28266000  | -0.34214400 |
| H  | 7.22661200 | 0.78754600  | 1.22634500  |
| C  | 2.83387700 | 2.39104200  | -1.62492800 |
| H  | 3.87275200 | 1.17455000  | -3.08226800 |

|   |             |             |             |
|---|-------------|-------------|-------------|
| H | 4.80279600  | 2.54690200  | -2.47580600 |
| H | 6.14390200  | 2.32356300  | -0.39119500 |
| C | 1.85904100  | 1.28413100  | -1.19451200 |
| C | 2.17522600  | 3.18532100  | -2.77066900 |
| C | 3.15629000  | 3.33218500  | -0.45899700 |
| O | 1.55297100  | 0.41731900  | -2.07509800 |
| O | 1.41796400  | 1.31069500  | -0.00148600 |
| H | 1.26152800  | 3.68292000  | -2.43026100 |
| H | 2.86133300  | 3.96060500  | -3.12739500 |
| H | 1.92123600  | 2.53226000  | -3.60948500 |
| H | 3.85935800  | 4.10100800  | -0.79712300 |
| H | 2.25562800  | 3.82921400  | -0.09477100 |
| H | 3.60627900  | 2.79696800  | 0.37892300  |
| O | -0.99756800 | -2.60438400 | -0.96263300 |
| C | -1.38737300 | -2.62316000 | 0.24391800  |
| O | -1.09997700 | -1.74661300 | 1.12531600  |
| C | -2.26938100 | -3.79169700 | 0.70224400  |
| C | -3.60612000 | -3.22045000 | 1.26659300  |
| C | -1.52688300 | -4.52829900 | 1.83456900  |
| C | -2.53976200 | -4.76211100 | -0.45365400 |
| H | -4.22765500 | -4.07563800 | 1.55275800  |
| H | -3.37826200 | -2.66144600 | 2.17899700  |
| C | -4.35725000 | -2.32871600 | 0.30539800  |
| H | -2.13711200 | -5.36173400 | 2.19801600  |
| H | -0.57617200 | -4.93621700 | 1.47443200  |
| H | -1.31878800 | -3.85721300 | 2.67171300  |
| H | -1.60609200 | -5.18160800 | -0.83804600 |
| H | -3.16470000 | -5.58750200 | -0.09660100 |
| H | -3.05605200 | -4.27269700 | -1.28189500 |
| C | -4.04633600 | -0.96532300 | 0.23593000  |
| C | -5.34405200 | -2.83214200 | -0.55214700 |
| C | -4.67467600 | -0.10501000 | -0.67174000 |
| H | -3.28454300 | -0.57025300 | 0.89585900  |
| C | -5.99207800 | -1.98680800 | -1.45516400 |
| H | -5.61105600 | -3.88430200 | -0.50516800 |
| C | -4.27196300 | 1.34950700  | -0.73499100 |
| C | -5.65898200 | -0.63256000 | -1.51844900 |
| H | -6.76422200 | -2.38425900 | -2.10808800 |
| C | -3.07145900 | 1.65884100  | -1.68145000 |
| H | -5.11467500 | 1.95603000  | -1.08365400 |
| H | -4.01215400 | 1.70279100  | 0.26689200  |
| H | -6.17122400 | 0.02078000  | -2.21933100 |
| C | -1.85865300 | 0.81872800  | -1.25175000 |
| C | -3.44319600 | 1.37929500  | -3.14147400 |

|   |             |             |             |
|---|-------------|-------------|-------------|
| C | -2.70495700 | 3.14546100  | -1.51288000 |
| O | -1.33101200 | 0.04624300  | -2.10856100 |
| O | -1.46086200 | 0.96909600  | -0.04778900 |
| H | -4.30688900 | 1.99142500  | -3.42166900 |
| H | -2.61530800 | 1.62909400  | -3.81065700 |
| H | -3.69842900 | 0.32967800  | -3.29932800 |
| H | -3.55685900 | 3.77601000  | -1.78621400 |
| H | -2.43740200 | 3.36306300  | -0.47701300 |
| H | -1.87068200 | 3.41051100  | -2.17350300 |
| H | -2.27187000 | 5.44020900  | 1.30221700  |
| O | -2.10306900 | 6.09674000  | 0.48044600  |
| H | -1.92772000 | 6.99109800  | 0.81747800  |
| H | -1.15366800 | 5.65115700  | -0.03960300 |
| O | -0.12787500 | 5.02772700  | -0.39573000 |
| H | -0.35123300 | 4.36298100  | -1.06764000 |
| H | 0.06237100  | 4.49307700  | 0.52162700  |
| C | 0.04119800  | 0.50800700  | 2.82181900  |
| C | -1.32757800 | 0.15568200  | 3.44101300  |
| C | -2.26500100 | 1.31369300  | 2.99491500  |
| H | 0.94498500  | 0.04477400  | 3.20364400  |
| H | -1.70563200 | -0.80821500 | 3.10160100  |
| H | -1.26111700 | 0.13585300  | 4.53660700  |
| H | -2.78803800 | 1.08442400  | 2.06625500  |
| H | -2.98237900 | 1.61878100  | 3.75760300  |
| N | -1.29627000 | 2.38324200  | 2.73813300  |
| C | -1.31922800 | 3.70861800  | 2.36192300  |
| O | -2.38493700 | 4.37553600  | 2.22883500  |
| C | 0.04820400  | 4.05400800  | 2.08726700  |
| H | 0.48539100  | 4.94672700  | 2.52709800  |
| C | -0.02426200 | 1.90150600  | 2.68085600  |
| O | 0.82924200  | 2.86753400  | 2.41801500  |

**14**

|    |            |             |             |
|----|------------|-------------|-------------|
| Rh | 0.39591100 | -1.04605800 | -1.60674400 |
| Rh | 0.19190300 | -0.21642300 | 0.64947700  |
| O  | 1.81191500 | -1.36473700 | 1.14732400  |
| C  | 2.37669100 | -2.07414200 | 0.25368200  |
| O  | 2.01180600 | -2.14413900 | -0.96265800 |
| C  | 3.58468200 | -2.92298800 | 0.66446000  |
| C  | 3.92789600 | -2.71402800 | 2.14370000  |
| C  | 3.22468300 | -4.40202500 | 0.41769100  |
| C  | 4.79309100 | -2.54433000 | -0.24783500 |
| H  | 4.79311800 | -3.33113200 | 2.40751900  |
| H  | 4.16989800 | -1.67149900 | 2.35952000  |

|   |             |             |             |
|---|-------------|-------------|-------------|
| H | 3.09124800  | -3.00706800 | 2.78381400  |
| H | 2.97759400  | -4.57788200 | -0.63240900 |
| H | 4.07305300  | -5.03964600 | 0.68705400  |
| H | 2.36700200  | -4.70156500 | 1.02975800  |
| H | 5.64412900  | -3.14996900 | 0.08156600  |
| H | 4.55109300  | -2.84639400 | -1.27066400 |
| C | 5.16004800  | -1.07820200 | -0.22952800 |
| C | 4.53962200  | -0.19059600 | -1.11777200 |
| C | 6.09585000  | -0.56728900 | 0.67996500  |
| C | 4.80544600  | 1.18455700  | -1.09845900 |
| H | 3.82307500  | -0.57789000 | -1.83315800 |
| C | 6.38881800  | 0.79747000  | 0.69993800  |
| H | 6.60356200  | -1.24163900 | 1.36403000  |
| C | 4.05363700  | 2.11120900  | -2.02628000 |
| C | 5.74480200  | 1.67015600  | -0.17896800 |
| H | 7.12598500  | 1.18182900  | 1.39952200  |
| C | 2.69826700  | 2.62755300  | -1.45116000 |
| H | 3.84937800  | 1.59746100  | -2.97015800 |
| H | 4.66178300  | 2.99263700  | -2.25554800 |
| H | 5.97789700  | 2.73111600  | -0.15933700 |
| C | 1.83393800  | 1.41594300  | -1.08636100 |
| C | 1.95584000  | 3.42130100  | -2.54469600 |
| C | 2.92640100  | 3.53098600  | -0.23323100 |
| O | 1.56944600  | 0.59003300  | -2.01950300 |
| O | 1.43207700  | 1.31505400  | 0.11571000  |
| H | 1.00126800  | 3.79557100  | -2.16109900 |
| H | 2.55801200  | 4.28344800  | -2.85001400 |
| H | 1.76265900  | 2.80166500  | -3.42412800 |
| H | 3.56880600  | 4.36992500  | -0.52137500 |
| H | 1.97994700  | 3.93679700  | 0.13079700  |
| H | 3.40546200  | 2.99376800  | 0.58712900  |
| O | -0.82205600 | -2.60550400 | -1.09834300 |
| C | -1.28263200 | -2.67377400 | 0.08241200  |
| O | -1.03075300 | -1.84087100 | 1.01609500  |
| C | -2.19603600 | -3.85360300 | 0.43328800  |
| C | -3.52385000 | -3.31289700 | 1.04400800  |
| C | -1.46993300 | -4.69936300 | 1.49961700  |
| C | -2.48099000 | -4.71268500 | -0.80413000 |
| H | -4.14234700 | -4.18384400 | 1.28488200  |
| H | -3.28410600 | -2.81335400 | 1.98731100  |
| C | -4.29699300 | -2.36414700 | 0.15555100  |
| H | -2.09384800 | -5.55293700 | 1.78433300  |
| H | -0.52247400 | -5.08699400 | 1.10995400  |
| H | -1.25884600 | -4.10937100 | 2.39553100  |

|   |             |             |             |
|---|-------------|-------------|-------------|
| H | -1.55642700 | -5.12278700 | -1.21858900 |
| H | -3.13193900 | -5.54770700 | -0.52498200 |
| H | -2.97738200 | -4.13764900 | -1.58870500 |
| C | -3.95684200 | -1.00678200 | 0.12393400  |
| C | -5.35267800 | -2.80276100 | -0.65423200 |
| C | -4.62785800 | -0.08504100 | -0.68756900 |
| H | -3.13925900 | -0.66089800 | 0.74029000  |
| C | -6.04021600 | -1.89820200 | -1.46668500 |
| H | -5.64379800 | -3.84955900 | -0.63893100 |
| C | -4.19261200 | 1.36277500  | -0.70040800 |
| C | -5.68184400 | -0.54856200 | -1.48595100 |
| H | -6.86490900 | -2.24587000 | -2.08275300 |
| C | -2.99170000 | 1.66568400  | -1.64670200 |
| H | -5.02253600 | 1.99947800  | -1.02429900 |
| H | -3.91740200 | 1.67718100  | 0.31019000  |
| H | -6.22737200 | 0.14978600  | -2.11479900 |
| C | -1.79075300 | 0.81175100  | -1.22337000 |
| C | -3.37025500 | 1.39400200  | -3.10691800 |
| C | -2.58746000 | 3.14345500  | -1.48126900 |
| O | -1.24892100 | 0.06805000  | -2.09699600 |
| O | -1.40385900 | 0.91836200  | -0.00946100 |
| H | -4.23026300 | 2.01477000  | -3.37903600 |
| H | -2.54380400 | 1.64164400  | -3.77840100 |
| H | -3.63627900 | 0.34749900  | -3.26936200 |
| H | -3.41988700 | 3.79221300  | -1.77224400 |
| H | -2.32202400 | 3.36645000  | -0.44867400 |
| H | -1.72947800 | 3.37837200  | -2.11989000 |
| H | -2.93387000 | 5.08463200  | 1.41097300  |
| O | -2.71822100 | 5.93204200  | 0.96413500  |
| H | -2.52748300 | 6.54855700  | 1.68579900  |
| H | -1.26448200 | 5.74089100  | -0.04608200 |
| O | -0.43834000 | 5.55616800  | -0.54696000 |
| H | -0.74625000 | 5.33699100  | -1.43618500 |
| H | -0.43925000 | 3.94849600  | 0.97875500  |
| C | 0.18335800  | 0.28928100  | 2.99808500  |
| C | -1.04607000 | -0.35165400 | 3.64883600  |
| C | -2.22684800 | 0.59082900  | 3.26729700  |
| H | 1.19625400  | -0.03234600 | 3.19685500  |
| H | -1.22927400 | -1.36560800 | 3.29372000  |
| H | -0.92256600 | -0.38375900 | 4.73792800  |
| H | -2.80288300 | 0.21243500  | 2.42327100  |
| H | -2.90218700 | 0.80134900  | 4.09733100  |
| N | -1.52554200 | 1.81293500  | 2.85894600  |
| C | -1.86534200 | 3.02779400  | 2.36686000  |

|   |             |            |            |
|---|-------------|------------|------------|
| O | -2.99497500 | 3.49337200 | 2.22686000 |
| C | -0.53008900 | 3.69251400 | 2.03855700 |
| H | -0.36357900 | 4.58509600 | 2.64683100 |
| C | -0.16600600 | 1.58683500 | 2.73483400 |
| O | 0.47509900  | 2.69745100 | 2.38671700 |

**2a'**

|   |             |             |             |
|---|-------------|-------------|-------------|
| C | 0.44861300  | 0.87584600  | -0.00003300 |
| C | 1.13628300  | -1.37597600 | 0.00003200  |
| C | 1.77950500  | 0.99044100  | 0.00007200  |
| H | 1.09837000  | -2.01215100 | 0.88745800  |
| H | 1.09845900  | -2.01238900 | -0.88722400 |
| H | 2.34917100  | 1.90773100  | 0.00017100  |
| C | 2.37388400  | -0.41253100 | -0.00002600 |
| H | 3.00228200  | -0.59424200 | -0.87964800 |
| H | 3.00241100  | -0.59431900 | 0.87948600  |
| O | -0.60527000 | 1.72389200  | -0.00000500 |
| C | -1.81442600 | 0.91911000  | 0.00000600  |
| H | -2.40456300 | 1.14603700  | 0.89291000  |
| H | -2.40456600 | 1.14604600  | -0.89289800 |
| C | -1.34699300 | -0.54311800 | 0.00000300  |
| O | -2.04819800 | -1.54515900 | 0.00004000  |
| N | 0.00356900  | -0.44845900 | -0.00012200 |

**TS8'**

|    |             |             |             |
|----|-------------|-------------|-------------|
| Rh | -0.18781900 | 0.00230300  | 0.54352600  |
| O  | -1.59389500 | -1.47447500 | 0.57444500  |
| O  | 1.21550500  | -1.42491000 | 0.15518100  |
| O  | 1.19206200  | 1.51012500  | 0.41682100  |
| O  | -1.63528700 | 1.41697900  | 0.82858500  |
| Rh | -0.51018300 | 0.20141700  | -1.80333400 |
| C  | -2.19379300 | 1.93498900  | -0.19064800 |
| O  | -1.92930400 | 1.62937100  | -1.39920700 |
| C  | 1.45606900  | 2.02207100  | -0.72140900 |
| O  | 0.91144500  | 1.67411100  | -1.81637600 |
| C  | -2.13790900 | -1.83242500 | -0.51923700 |
| O  | -1.89322900 | -1.31423100 | -1.65771100 |
| O  | 0.94530200  | -1.21686800 | -2.07331900 |
| C  | 1.49213800  | -1.73635000 | -1.04866000 |
| C  | -3.15758400 | -2.97380400 | -0.47726000 |
| C  | -3.25821600 | 3.01321700  | 0.03271600  |
| C  | 2.49719300  | 3.14433200  | -0.74454800 |
| C  | 2.54944700  | -2.82595700 | -1.23885200 |
| C  | -4.50351500 | -2.46135800 | -1.07760800 |



|   |             |             |             |
|---|-------------|-------------|-------------|
| H | -5.21924900 | -3.28730700 | -1.00838600 |
| H | -4.34337300 | -2.25330200 | -2.13931300 |
| C | -3.35518800 | -3.48124000 | 0.95614300  |
| H | -4.09183900 | -4.29129600 | 0.95556000  |
| H | -2.41917700 | -3.87182900 | 1.36489700  |
| H | -3.71196500 | -2.69208700 | 1.62086500  |
| C | -2.62072000 | -4.11664400 | -1.36251300 |
| H | -3.32999400 | -4.95067500 | -1.35912600 |
| H | -2.47888500 | -3.78426200 | -2.39398700 |
| H | -1.66170900 | -4.48532800 | -0.98263000 |
| C | -4.58424300 | 2.55540200  | -0.65301700 |
| H | -5.33019100 | 3.33220600  | -0.45427200 |
| H | -4.41566000 | 2.53097000  | -1.73338500 |
| C | -2.77063800 | 4.30595800  | -0.65189000 |
| H | -3.51745100 | 5.09606600  | -0.52273500 |
| H | -1.83056500 | 4.65136200  | -0.20825400 |
| H | -2.61107100 | 4.14998000  | -1.72180400 |
| C | -3.47477600 | 3.26893500  | 1.52857100  |
| H | -2.55393500 | 3.62060200  | 2.00198200  |
| H | -4.24205100 | 4.03924600  | 1.65838500  |
| H | -3.79971000 | 2.36708000  | 2.05103000  |
| C | 2.75672300  | 3.62298600  | -2.17734800 |
| H | 3.50552700  | 4.42166900  | -2.16363400 |
| H | 3.12587600  | 2.81607400  | -2.81335900 |
| H | 1.84303600  | 4.01905700  | -2.62854000 |
| C | 1.94490400  | 4.30973500  | 0.10175000  |
| H | 1.75888100  | 3.99590600  | 1.13223400  |
| H | 2.66699500  | 5.13261000  | 0.11266000  |
| H | 1.00679900  | 4.68717500  | -0.31934000 |
| C | 3.81052900  | 2.62337200  | -0.08214000 |
| H | 4.53536200  | 3.44338600  | -0.12417100 |
| H | 3.59998100  | 2.42359000  | 0.97231200  |
| C | 3.85576700  | -2.39434600 | -0.49847500 |
| H | 3.64670600  | -2.37960700 | 0.57435800  |
| H | 4.59507400  | -3.18203100 | -0.67954800 |
| C | 2.01746900  | -4.11047000 | -0.56954900 |
| H | 1.07058400  | -4.42435300 | -1.02237700 |
| H | 2.74218800  | -4.92034700 | -0.70328800 |
| H | 1.86299400  | -3.95611100 | 0.50090900  |
| C | 2.81383900  | -3.07935700 | -2.72672900 |
| H | 3.57770100  | -3.85646800 | -2.83342900 |
| H | 1.90636200  | -3.42073100 | -3.23269000 |
| H | 3.16541700  | -2.17877200 | -3.23464300 |
| C | -5.05887900 | -1.22976300 | -0.40044400 |

|   |             |             |             |
|---|-------------|-------------|-------------|
| C | -4.65929000 | 0.04217100  | -0.82956800 |
| C | -5.94724300 | -1.32188700 | 0.67932200  |
| C | -5.09670600 | 1.21044400  | -0.19320300 |
| H | -3.98272000 | 0.12386000  | -1.67271600 |
| C | -6.41097100 | -0.16710500 | 1.31215500  |
| H | -6.28368500 | -2.29841700 | 1.01637600  |
| C | -5.98507600 | 1.09147800  | 0.88392000  |
| H | -7.11060900 | -0.24810900 | 2.13946300  |
| H | -6.35136800 | 1.98640700  | 1.37919500  |
| C | 4.40704100  | -1.05616400 | -0.93070700 |
| C | 3.95343900  | 0.11701000  | -0.31372700 |
| C | 5.34645800  | -0.94741300 | -1.96474200 |
| C | 4.38593500  | 1.38364200  | -0.72686500 |
| H | 3.24061000  | 0.04052600  | 0.49881500  |
| C | 5.80664600  | 0.30596900  | -2.37272500 |
| H | 5.72497400  | -1.84672100 | -2.44282600 |
| C | 5.32516700  | 1.46612500  | -1.76357300 |
| H | 6.54494500  | 0.37871000  | -3.16658900 |
| H | 5.68594200  | 2.43902800  | -2.08578600 |
| C | 1.59667500  | 0.82572400  | 4.53083200  |
| C | 3.08909200  | 0.82418200  | 4.82742100  |
| C | 3.68339200  | -0.05612100 | 3.67436600  |
| H | 1.06248400  | -0.58984400 | 4.70342300  |
| H | 0.88949900  | 1.47223100  | 5.04048600  |
| H | 3.50050300  | 1.83653600  | 4.79619300  |
| H | 3.29319900  | 0.41500400  | 5.82010100  |
| H | 4.38421400  | 0.49773300  | 3.04881200  |
| H | 4.16846200  | -0.96921100 | 4.02243000  |
| N | 2.49765100  | -0.44670900 | 2.87682300  |
| C | 1.96530600  | -1.78565300 | 2.97689300  |
| O | 2.64311300  | -2.80437900 | 2.94249000  |
| C | 0.57365400  | -1.55754900 | 3.32162400  |
| H | -0.22498900 | -2.27018700 | 3.15956000  |
| C | 1.44698600  | 0.37330500  | 3.21345000  |
| O | 0.26650100  | -0.20136600 | 2.88009400  |

**TS8''**

|    |             |             |             |
|----|-------------|-------------|-------------|
| Rh | 0.04745100  | -0.06174900 | -0.34325200 |
| O  | 1.47947500  | -1.05394200 | -1.42165000 |
| O  | -1.37636200 | -1.03995300 | -1.43886200 |
| O  | -1.35004800 | 0.82682800  | 0.86305700  |
| O  | 1.48187900  | 0.81281600  | 0.81382300  |
| Rh | 0.02006700  | -1.89886300 | 1.19231300  |
| C  | 1.86252300  | 0.23550400  | 1.87995000  |

|   |             |             |             |
|---|-------------|-------------|-------------|
| O | 1.44840100  | -0.89896600 | 2.28878100  |
| C | -1.79627400 | 0.22018900  | 1.88785300  |
| O | -1.43185100 | -0.93760700 | 2.27044100  |
| C | 1.87006100  | -2.19909500 | -1.02826300 |
| O | 1.44930900  | -2.79464900 | 0.01578500  |
| O | -1.43414600 | -2.75746700 | 0.02569400  |
| C | -1.82267600 | -2.16055900 | -1.02760600 |
| C | 2.92521800  | -2.92485500 | -1.86963300 |
| C | 2.89954100  | 0.95222100  | 2.75054300  |
| C | -2.84216800 | 0.97201500  | 2.71637200  |
| C | -2.89771300 | -2.82105000 | -1.89614800 |
| C | 4.16858700  | -3.20513700 | -0.96893900 |
| H | 4.91957200  | -3.68999500 | -1.60195400 |
| H | 3.87262100  | -3.92476200 | -0.20046000 |
| C | 3.31481200  | -2.09314600 | -3.09759800 |
| H | 4.06927900  | -2.63407600 | -3.67846800 |
| H | 2.44803400  | -1.91915600 | -3.74127600 |
| H | 3.72677000  | -1.12209900 | -2.81638500 |
| C | 2.32936700  | -4.27186600 | -2.32399200 |
| H | 3.06999400  | -4.82406200 | -2.91177700 |
| H | 2.03795400  | -4.88422500 | -1.46701400 |
| H | 1.44626000  | -4.11432200 | -2.95277700 |
| C | 4.15360900  | 0.03266900  | 2.88523800  |
| H | 4.89527900  | 0.58556300  | 3.47168600  |
| H | 3.86660200  | -0.84966800 | 3.46460000  |
| C | 2.28444100  | 1.16004600  | 4.14848300  |
| H | 3.00986400  | 1.65459900  | 4.80284400  |
| H | 1.39241900  | 1.79324700  | 4.09029500  |
| H | 2.00153300  | 0.20621100  | 4.60083300  |
| C | 3.27490400  | 2.30885000  | 2.14407700  |
| H | 2.39860700  | 2.95725200  | 2.07059400  |
| H | 4.01581400  | 2.80097300  | 2.78312500  |
| H | 3.69561700  | 2.20263900  | 1.14308000  |
| C | -3.36564400 | 0.10359500  | 3.86515000  |
| H | -4.11316800 | 0.66457000  | 4.43593900  |
| H | -3.82975800 | -0.81459200 | 3.50000100  |
| H | -2.55491600 | -0.17390000 | 4.54435300  |
| C | -2.15930900 | 2.23197000  | 3.28591500  |
| H | -1.77203700 | 2.86169500  | 2.48171500  |
| H | -2.88003000 | 2.81331500  | 3.87040400  |
| H | -1.32693400 | 1.96121700  | 3.94461400  |
| C | -3.99799100 | 1.41549600  | 1.76587100  |
| H | -4.72630000 | 1.95924600  | 2.37735500  |
| H | -3.58163200 | 2.11391600  | 1.03501900  |

|   |             |             |             |
|---|-------------|-------------|-------------|
| C | -4.06371400 | -1.80522300 | -2.10900100 |
| H | -3.67376500 | -0.96036500 | -2.68323200 |
| H | -4.81502900 | -2.30715500 | -2.72828100 |
| C | -2.26114500 | -3.13270800 | -3.26648500 |
| H | -1.42136200 | -3.82752900 | -3.15711100 |
| H | -3.00403300 | -3.59878900 | -3.92212400 |
| H | -1.89634400 | -2.22137700 | -3.74776500 |
| C | -3.40433100 | -4.11700400 | -1.25374600 |
| H | -4.17408400 | -4.56353700 | -1.89178500 |
| H | -2.59201100 | -4.84002300 | -1.14080500 |
| H | -3.83640200 | -3.93654100 | -0.26741500 |
| C | 4.75387600  | -1.97812900 | -0.30945000 |
| C | 4.27997500  | -1.56642200 | 0.94239100  |
| C | 5.74843700  | -1.21175900 | -0.93177700 |
| C | 4.74882200  | -0.40407500 | 1.56691300  |
| H | 3.51876600  | -2.15820900 | 1.43826800  |
| C | 6.24198300  | -0.06060700 | -0.31515200 |
| H | 6.14429200  | -1.52445700 | -1.89403900 |
| C | 5.74319800  | 0.34512700  | 0.92402100  |
| H | 7.02352500  | 0.51873500  | -0.79905400 |
| H | 6.13380500  | 1.23957900  | 1.40115600  |
| C | -4.69635800 | -1.29905300 | -0.83303300 |
| C | -4.15841400 | -0.18218500 | -0.17915700 |
| C | -5.80073600 | -1.94500500 | -0.26114600 |
| C | -4.67106600 | 0.27089700  | 1.04398900  |
| H | -3.32186400 | 0.34479900  | -0.62515300 |
| C | -6.34363800 | -1.48562200 | 0.93997400  |
| H | -6.24140700 | -2.80164900 | -0.76392700 |
| C | -5.77851800 | -0.38925400 | 1.59338200  |
| H | -7.20984800 | -1.98312100 | 1.36762800  |
| H | -6.20236700 | -0.03880100 | 2.53052900  |
| C | 1.74573700  | 4.60120300  | -0.40308200 |
| C | 0.74225300  | 5.29948700  | 0.51508100  |
| C | -0.63201000 | 4.66348300  | 0.12998600  |
| H | 0.72706700  | 5.30075700  | -2.35210100 |
| H | 2.80599500  | 4.80630000  | -0.43662600 |
| H | 0.96312900  | 5.09972900  | 1.57269400  |
| H | 0.71865700  | 6.38611300  | 0.39126200  |
| H | -1.25151400 | 4.42758100  | 0.99531400  |
| H | -1.20769500 | 5.31031500  | -0.53916500 |
| N | -0.22449300 | 3.44035300  | -0.57007200 |
| C | -0.86443300 | 2.52370700  | -1.38923100 |
| O | -2.10094300 | 2.45713900  | -1.55786100 |
| C | 0.21657400  | 1.83710000  | -2.05997900 |

|   |             |            |             |
|---|-------------|------------|-------------|
| H | 0.28847400  | 0.83402100 | -2.46096600 |
| C | 1.13316600  | 3.48369200 | -0.85917700 |
| O | 1.47053100  | 2.44445700 | -1.64027500 |
| O | -2.36661900 | 4.95698600 | -2.57511800 |
| H | -2.44307300 | 4.04674800 | -2.19046300 |
| H | -2.87315800 | 4.93745800 | -3.40138600 |
| O | 0.33031600  | 3.22000100 | -4.34089100 |
| H | 1.21667700  | 3.03806000 | -4.70262900 |
| H | 0.17404800  | 2.53867700 | -3.51343100 |
| O | 0.16283100  | 5.32654000 | -3.15873500 |
| H | -0.80586100 | 5.29029800 | -2.87445600 |
| H | 0.31919800  | 4.23942000 | -3.83761400 |

### TS8\_Cu

|    |             |             |             |
|----|-------------|-------------|-------------|
| Cu | -0.07230300 | -0.95823000 | 0.47085000  |
| N  | -1.42295000 | -0.75414200 | 2.00334400  |
| N  | -0.17883200 | 1.17644800  | -0.17603600 |
| N  | -1.28421300 | -1.70337000 | -0.87296600 |
| C  | -2.44531400 | -0.54512300 | 2.50650400  |
| C  | -0.85186200 | 2.02688100  | -0.58732000 |
| C  | -2.17820800 | -1.96037000 | -1.56209300 |
| C  | -1.69892700 | 3.08051600  | -1.11808800 |
| H  | -2.45267500 | 2.61951800  | -1.75990300 |
| H  | -2.20347500 | 3.59276900  | -0.29584100 |
| H  | -1.09779800 | 3.79552500  | -1.68605800 |
| C  | -3.74003400 | -0.29597500 | 3.11280100  |
| H  | -4.50989600 | -0.60419100 | 2.40216500  |
| H  | -3.83404600 | -0.85968000 | 4.04472800  |
| H  | -3.84976600 | 0.77197800  | 3.31597700  |
| C  | -3.31744800 | -2.27738500 | -2.40228400 |
| H  | -3.33707000 | -1.60193000 | -3.26086100 |
| H  | -3.25348100 | -3.31241500 | -2.74847400 |
| H  | -4.22385300 | -2.12845000 | -1.81171500 |
| B  | -4.26785000 | 0.65214700  | -0.38692000 |
| F  | -3.52090200 | 1.36258700  | 0.57538100  |
| F  | -3.55153200 | 0.62779900  | -1.60505500 |
| F  | -4.45736300 | -0.67653600 | 0.06109600  |
| F  | -5.50766300 | 1.26794000  | -0.57891600 |
| C  | 3.69455000  | 2.08107500  | 0.70820600  |
| C  | 3.93769000  | 2.40505200  | -0.77398600 |
| C  | 3.66372600  | 1.05323800  | -1.51037500 |
| H  | 5.04161400  | 0.92137400  | 0.87685100  |
| H  | 3.70461700  | 2.82530100  | 1.49376300  |
| H  | 3.24236400  | 3.17216600  | -1.13630500 |

|   |            |             |             |
|---|------------|-------------|-------------|
| H | 4.95108900 | 2.76254000  | -0.97827300 |
| H | 3.07118900 | 1.17165000  | -2.41863800 |
| H | 4.58789000 | 0.52760500  | -1.77044000 |
| N | 2.91156200 | 0.30491100  | -0.49908900 |
| C | 2.53383400 | -1.01589400 | -0.31722600 |
| O | 2.83506800 | -1.93086700 | -1.13155300 |
| C | 1.88476700 | -1.05283800 | 0.97073400  |
| H | 2.12614100 | -1.88125600 | 1.63320300  |
| C | 2.90773600 | 0.95351900  | 0.71425900  |
| O | 2.29185900 | 0.22307100  | 1.62961600  |
| O | 5.35301900 | -1.72004200 | -0.63176900 |
| H | 4.38115200 | -1.86566300 | -0.93106600 |
| H | 5.63603600 | -2.52766800 | -0.16967400 |
| O | 5.78720000 | 0.19395800  | 0.78445400  |
| H | 5.53604400 | -0.74003600 | 0.08320500  |
| H | 6.59791200 | 0.64064100  | 0.48521400  |

**15**

|    |             |             |             |
|----|-------------|-------------|-------------|
| Rh | -2.20434100 | 1.73446500  | 0.83580500  |
| O  | -2.81798300 | 0.24477600  | 2.08752700  |
| O  | -0.77710100 | 2.24002400  | 2.21730200  |
| O  | -1.53275700 | 3.15225700  | -0.49738200 |
| O  | -3.55812300 | 1.11843600  | -0.58291800 |
| Rh | -0.62801100 | 0.21312200  | -0.12580200 |
| C  | -3.20434700 | 0.25748700  | -1.44691100 |
| O  | -2.05341300 | -0.28875200 | -1.50360300 |
| C  | -0.62888000 | 2.83803400  | -1.33633300 |
| O  | -0.05755000 | 1.70280400  | -1.39761400 |
| C  | -2.25079800 | -0.89195700 | 2.01432600  |
| O  | -1.31396200 | -1.19157400 | 1.20488900  |
| O  | 0.70227700  | 0.79520100  | 1.30677900  |
| C  | 0.35190600  | 1.64685500  | 2.18215700  |
| C  | -2.70406200 | -1.99439700 | 2.97578300  |
| C  | -4.20885500 | -0.16773000 | -2.52080200 |
| C  | -0.19211600 | 3.91519900  | -2.33307600 |
| C  | 1.36371100  | 2.00643600  | 3.27353200  |
| C  | -3.08137400 | -3.25919200 | 2.14483700  |
| H  | -3.41064200 | -4.02317400 | 2.85696700  |
| H  | -2.16940000 | -3.62560900 | 1.66737900  |
| C  | -3.88555100 | -1.52730700 | 3.83321800  |
| H  | -4.18813700 | -2.33670800 | 4.50573800  |
| H  | -3.60864600 | -0.66259800 | 4.44219800  |
| H  | -4.74588900 | -1.24868300 | 3.22112800  |
| C  | -1.50447000 | -2.34048800 | 3.88188300  |

|   |             |             |             |
|---|-------------|-------------|-------------|
| H | -1.78427800 | -3.14091000 | 4.57469600  |
| H | -0.64789600 | -2.67314900 | 3.29034500  |
| H | -1.19977100 | -1.47036600 | 4.47330600  |
| C | -4.33954900 | -1.72268200 | -2.49048200 |
| H | -5.06739300 | -1.99750100 | -3.26138200 |
| H | -3.37467200 | -2.14760000 | -2.78080700 |
| C | -3.63108500 | 0.25324500  | -3.88770400 |
| H | -4.31650100 | -0.04597200 | -4.68741100 |
| H | -3.50393300 | 1.34014500  | -3.93843200 |
| H | -2.65994500 | -0.21552300 | -4.06607200 |
| C | -5.56763400 | 0.50525900  | -2.29956800 |
| H | -5.47681800 | 1.59354300  | -2.35188800 |
| H | -6.26598600 | 0.18177700  | -3.07833900 |
| H | -5.99185900 | 0.24731800  | -1.32715900 |
| C | 0.75771600  | 3.33652200  | -3.38818000 |
| H | 1.00540400  | 4.11525200  | -4.11700600 |
| H | 1.68664800  | 2.97840300  | -2.94299500 |
| H | 0.29162900  | 2.50262900  | -3.92124800 |
| C | -1.44621100 | 4.48343900  | -3.02301100 |
| H | -2.15006900 | 4.88928500  | -2.29268800 |
| H | -1.15690800 | 5.28383100  | -3.71180000 |
| H | -1.95771500 | 3.70628700  | -3.60124900 |
| C | 0.50526200  | 5.06139500  | -1.53041800 |
| H | 0.91668500  | 5.76054100  | -2.26650200 |
| H | -0.26558400 | 5.59471900  | -0.96663300 |
| C | 1.77222300  | 3.50224600  | 3.07668500  |
| H | 0.91782000  | 4.12585000  | 3.35588600  |
| H | 2.57837600  | 3.71010200  | 3.78845300  |
| C | 0.68545500  | 1.85253700  | 4.64717200  |
| H | 0.37769600  | 0.81453100  | 4.81386500  |
| H | 1.38915600  | 2.12867300  | 5.43938100  |
| H | -0.19743500 | 2.49119600  | 4.72789800  |
| C | 2.58917900  | 1.09010000  | 3.19199400  |
| H | 3.30984200  | 1.37341100  | 3.96644300  |
| H | 2.30660900  | 0.04550800  | 3.35002800  |
| H | 3.07496900  | 1.15798400  | 2.22024000  |
| C | -4.14844700 | -3.03089200 | 1.09909900  |
| C | -3.79642400 | -2.57102900 | -0.17678000 |
| C | -5.50464300 | -3.24104400 | 1.38255000  |
| C | -4.76050800 | -2.28774800 | -1.15319500 |
| H | -2.75055800 | -2.41799600 | -0.41212600 |
| C | -6.47715200 | -2.98587800 | 0.41407400  |
| H | -5.79649500 | -3.61377200 | 2.36048900  |
| C | -6.10968000 | -2.50600700 | -0.84422700 |

|    |             |             |             |
|----|-------------|-------------|-------------|
| H  | -7.52489800 | -3.16401700 | 0.63987800  |
| H  | -6.87062100 | -2.30761900 | -1.59392600 |
| C  | 2.20345300  | 3.85177600  | 1.67155700  |
| C  | 1.25544900  | 4.32144700  | 0.75426100  |
| C  | 3.52426200  | 3.68085200  | 1.23720100  |
| C  | 1.58494100  | 4.60212700  | -0.57736500 |
| H  | 0.23084000  | 4.46140400  | 1.08328300  |
| C  | 3.87426200  | 3.96539600  | -0.08385300 |
| H  | 4.27954400  | 3.33206200  | 1.93522400  |
| C  | 2.91262700  | 4.42100800  | -0.98779700 |
| H  | 4.90334000  | 3.83792200  | -0.40809100 |
| H  | 3.19607200  | 4.65235900  | -2.01064200 |
| C  | 2.86178000  | 0.41759600  | -1.65163500 |
| H  | 2.18919700  | 1.01432900  | -2.25088800 |
| H  | 3.87503900  | 0.77188500  | -1.51846500 |
| C  | 2.43744700  | -0.69744200 | -1.03985400 |
| C  | 1.05261200  | -1.25339600 | -1.25498500 |
| N  | 0.56459400  | -0.98068200 | -2.47879000 |
| N  | 0.14433500  | -0.69119200 | -3.48204000 |
| C  | 0.61062700  | -2.57636900 | -0.72509000 |
| O  | 0.98702400  | -3.07022400 | 0.31483500  |
| O  | -0.27565500 | -3.15342800 | -1.56396300 |
| C  | -0.77621700 | -4.44385600 | -1.16054400 |
| H  | -1.52986000 | -4.70550100 | -1.90223400 |
| H  | 0.03321900  | -5.17799600 | -1.16466500 |
| H  | -1.22186300 | -4.39229100 | -0.16705300 |
| O  | 3.18305400  | -1.45981200 | -0.21608000 |
| Si | 4.77725000  | -2.02361900 | -0.45555700 |
| C  | 6.03010100  | -0.63661900 | -0.07476500 |
| H  | 6.20265300  | -0.12966400 | -1.03623900 |
| C  | 4.92571900  | -3.44235400 | 0.78716000  |
| H  | 5.98738200  | -3.72932500 | 0.78265400  |
| C  | 4.94624300  | -2.53980400 | -2.27870800 |
| H  | 5.04011200  | -1.59452300 | -2.83276900 |
| C  | 3.73185100  | -3.28608900 | -2.85703700 |
| H  | 2.81779100  | -2.68937800 | -2.80482000 |
| H  | 3.90223200  | -3.52460300 | -3.91504000 |
| H  | 3.54067500  | -4.22974900 | -2.33797800 |
| C  | 6.24073900  | -3.34208000 | -2.50872600 |
| H  | 6.23743400  | -4.28228900 | -1.94535000 |
| H  | 6.35306100  | -3.59908700 | -3.56977800 |
| H  | 7.13359100  | -2.78141800 | -2.21436600 |
| C  | 5.50901500  | 0.41723900  | 0.91752300  |
| H  | 6.24176400  | 1.22611900  | 1.03847300  |



|   |            |             |             |
|---|------------|-------------|-------------|
| H | 4.57016100 | 0.86604800  | 0.58714700  |
| H | 5.33563600 | -0.01418900 | 1.90855000  |
| C | 7.38186700 | -1.19715800 | 0.40722800  |
| H | 7.81325600 | -1.92426900 | -0.28813500 |
| H | 8.11310900 | -0.38818100 | 0.53074700  |
| H | 7.27779500 | -1.69241600 | 1.37876800  |
| C | 4.56857700 | -2.97024400 | 2.20925500  |
| H | 4.66884400 | -3.79556000 | 2.92611500  |
| H | 5.21622700 | -2.15709700 | 2.55135100  |
| H | 3.53458500 | -2.61325600 | 2.25624900  |
| C | 4.09891100 | -4.68179800 | 0.40576000  |
| H | 4.43064700 | -5.11701800 | -0.54178200 |
| H | 4.19631000 | -5.45921800 | 1.17522500  |
| H | 3.03615900 | -4.43601900 | 0.31590400  |

**TS10**

|    |             |             |             |
|----|-------------|-------------|-------------|
| Rh | -2.33858000 | 1.77785900  | 0.55663200  |
| O  | -3.06028800 | 0.36991200  | 1.85747700  |
| O  | -1.08403800 | 2.44859400  | 2.05114800  |
| O  | -1.51809800 | 3.08119600  | -0.82309300 |
| O  | -3.49568900 | 0.99565100  | -0.94595400 |
| Rh | -0.61362700 | 0.19532300  | -0.07393000 |
| C  | -3.02859300 | 0.07769400  | -1.68591800 |
| O  | -1.86697000 | -0.43972000 | -1.56861400 |
| C  | -0.51770400 | 2.70861200  | -1.51091400 |
| O  | 0.07692900  | 1.58742500  | -1.39126800 |
| C  | -2.48325500 | -0.75822500 | 1.93600800  |
| O  | -1.45815800 | -1.11119100 | 1.26368900  |
| O  | 0.48985200  | 0.93427600  | 1.47678400  |
| C  | 0.03690100  | 1.87018900  | 2.20972400  |
| C  | -3.02766700 | -1.79247300 | 2.92638000  |
| C  | -3.89283000 | -0.46489300 | -2.82862200 |
| C  | 0.04339900  | 3.67960100  | -2.55432200 |
| C  | 0.92988500  | 2.34541300  | 3.36086000  |
| C  | -3.26638000 | -3.13565200 | 2.17051000  |
| H  | -3.65952300 | -3.84965600 | 2.90208200  |
| H  | -2.29406700 | -3.50655200 | 1.83728600  |
| C  | -4.31731600 | -1.29542100 | 3.58840200  |
| H  | -4.68537300 | -2.05571200 | 4.28524400  |
| H  | -4.13840100 | -0.37482000 | 4.15026700  |
| H  | -5.09961200 | -1.09499200 | 2.85333000  |
| C  | -1.94258800 | -2.01792400 | 3.99969600  |
| H  | -2.28864800 | -2.76179200 | 4.72492000  |
| H  | -1.01293800 | -2.37391500 | 3.54896000  |

|   |             |             |             |
|---|-------------|-------------|-------------|
| H | -1.73162400 | -1.08884400 | 4.54017200  |
| C | -3.99314600 | -2.01618200 | -2.69084200 |
| H | -4.61836500 | -2.37046100 | -3.51743300 |
| H | -2.99215600 | -2.43314200 | -2.83252800 |
| C | -3.17622700 | -0.13359400 | -4.15378100 |
| H | -3.77218100 | -0.49827000 | -4.99682500 |
| H | -3.05095600 | 0.94840800  | -4.26961400 |
| H | -2.18985700 | -0.60176700 | -4.19735100 |
| C | -5.28267700 | 0.18112700  | -2.81765500 |
| H | -5.21070100 | 1.26259900  | -2.96126300 |
| H | -5.88331100 | -0.23332400 | -3.63393900 |
| H | -5.80736700 | -0.00018100 | -1.87747100 |
| C | 1.11449100  | 2.99419400  | -3.41316300 |
| H | 1.50425000  | 3.70801900  | -4.14647400 |
| H | 1.94692500  | 2.62763200  | -2.80995300 |
| H | 0.69291200  | 2.14233300  | -3.95472800 |
| C | -1.11029500 | 4.16490600  | -3.45029200 |
| H | -1.89515900 | 4.64228400  | -2.85900300 |
| H | -0.73377500 | 4.88917500  | -4.18003500 |
| H | -1.55346100 | 3.32776100  | -4.00040300 |
| C | 0.64422000  | 4.90566600  | -1.79524900 |
| H | 1.13720200  | 5.53517200  | -2.54373400 |
| H | -0.18493600 | 5.48268200  | -1.37526300 |
| C | 1.37396400  | 3.81060600  | 3.05281900  |
| H | 0.50049700  | 4.45941000  | 3.16584700  |
| H | 2.09708900  | 4.09545200  | 3.82462400  |
| C | 0.10475100  | 2.33983900  | 4.66057300  |
| H | -0.22184500 | 1.32417400  | 4.90854200  |
| H | 0.71604000  | 2.71149200  | 5.48950100  |
| H | -0.78016200 | 2.97415800  | 4.56888200  |
| C | 2.14854200  | 1.42679100  | 3.51671700  |
| H | 2.77089500  | 1.78494800  | 4.34372400  |
| H | 1.83657500  | 0.40326200  | 3.73993900  |
| H | 2.75624600  | 1.39730400  | 2.61119700  |
| C | -4.20366900 | -3.03175800 | 0.98974400  |
| C | -3.71000100 | -2.67207700 | -0.27138100 |
| C | -5.58066200 | -3.25090700 | 1.13101100  |
| C | -4.55801800 | -2.48897200 | -1.37141100 |
| H | -2.64543800 | -2.51525700 | -0.39714300 |
| C | -6.43663000 | -3.09872900 | 0.03895200  |
| H | -5.98025400 | -3.54802200 | 2.09669300  |
| C | -5.93109000 | -2.71267900 | -1.20354700 |
| H | -7.50097200 | -3.28297100 | 0.15630700  |
| H | -6.60197300 | -2.59133400 | -2.04951000 |

|    |             |             |             |
|----|-------------|-------------|-------------|
| C  | 1.96357700  | 4.01313800  | 1.67665500  |
| C  | 1.12629300  | 4.38084400  | 0.61643600  |
| C  | 3.32708200  | 3.82320800  | 1.41501900  |
| C  | 1.60779700  | 4.54879800  | -0.68742900 |
| H  | 0.07015800  | 4.53693100  | 0.81072400  |
| C  | 3.82773400  | 3.99659800  | 0.12308700  |
| H  | 3.99794500  | 3.55582000  | 2.22640200  |
| C  | 2.97538500  | 4.35366600  | -0.92378700 |
| H  | 4.88899800  | 3.86185200  | -0.06722900 |
| H  | 3.37476900  | 4.49757200  | -1.92361800 |
| C  | 2.81159300  | 0.49765900  | -0.39211000 |
| H  | 2.09377100  | 1.29400000  | -0.28798200 |
| H  | 3.86459900  | 0.75120000  | -0.36356900 |
| C  | 2.40406700  | -0.77476800 | -0.53589300 |
| C  | 0.96624700  | -1.14213100 | -0.59708300 |
| N  | 0.74065500  | -1.24051300 | -2.32504400 |
| N  | 0.44778400  | -0.84594000 | -3.32053400 |
| C  | 0.67520100  | -2.53135200 | -0.12945300 |
| O  | 1.01882500  | -2.89161400 | 0.97983900  |
| O  | -0.05479900 | -3.26594200 | -0.98088800 |
| C  | -0.43382900 | -4.57903200 | -0.51602400 |
| H  | 0.45360900  | -5.20337100 | -0.38748200 |
| H  | -0.97671600 | -4.50982500 | 0.42740100  |
| H  | -1.07559700 | -4.98692300 | -1.29588300 |
| O  | 3.22751900  | -1.84421200 | -0.69750100 |
| Si | 4.88255000  | -2.00353300 | -0.30232300 |
| C  | 5.17728000  | -1.31273600 | 1.44253600  |
| H  | 5.19189500  | -0.22064800 | 1.31679500  |
| C  | 5.14617700  | -3.87037000 | -0.46955900 |
| H  | 6.22924000  | -4.03781900 | -0.37991300 |
| C  | 5.90374400  | -1.00642800 | -1.56545500 |
| H  | 6.06491100  | -0.02270300 | -1.10002700 |
| C  | 5.15876700  | -0.77411800 | -2.89208700 |
| H  | 4.21075000  | -0.24800700 | -2.74251600 |
| H  | 5.76903000  | -0.17061500 | -3.57646300 |
| H  | 4.93643500  | -1.71834700 | -3.40076300 |
| C  | 7.28795500  | -1.63184200 | -1.81699800 |
| H  | 7.20077700  | -2.60813000 | -2.30594700 |
| H  | 7.89044900  | -0.99136200 | -2.47367100 |
| H  | 7.85560200  | -1.77706500 | -0.89180000 |
| C  | 4.07027300  | -1.64096200 | 2.45861000  |
| H  | 4.24089700  | -1.09498800 | 3.39536000  |
| H  | 3.07740900  | -1.37477600 | 2.08992500  |
| H  | 4.05188900  | -2.70718300 | 2.70296100  |

|   |            |             |             |
|---|------------|-------------|-------------|
| C | 6.56155900 | -1.72954900 | 1.97422700  |
| H | 7.37373000 | -1.41482800 | 1.31009300  |
| H | 6.75034300 | -1.27880300 | 2.95695700  |
| H | 6.63474000 | -2.81633700 | 2.09707300  |
| C | 4.44476700 | -4.66862700 | 0.64309100  |
| H | 4.55928000 | -5.74750400 | 0.47475700  |
| H | 4.85946000 | -4.44469500 | 1.62987100  |
| H | 3.37168500 | -4.45024700 | 0.67710600  |
| C | 4.70118700 | -4.37472300 | -1.85459400 |
| H | 5.22965800 | -3.87252700 | -2.67062900 |
| H | 4.88905400 | -5.45169700 | -1.95230200 |
| H | 3.62796400 | -4.21233000 | -2.00440800 |

**16**

|    |             |             |             |
|----|-------------|-------------|-------------|
| Rh | -2.20342200 | 1.72331300  | 0.69755700  |
| O  | -2.76138500 | 0.26088100  | 2.01818600  |
| O  | -0.81996200 | 2.37239500  | 2.08330200  |
| O  | -1.57232700 | 3.10154000  | -0.70296900 |
| O  | -3.47795800 | 0.94700600  | -0.71686700 |
| Rh | -0.49152200 | 0.21309700  | -0.15113900 |
| C  | -3.05702100 | 0.05218600  | -1.50996300 |
| O  | -1.87477200 | -0.43336400 | -1.51645600 |
| C  | -0.62886300 | 2.79122200  | -1.49087600 |
| O  | 0.01472600  | 1.68951200  | -1.46540400 |
| C  | -2.12623000 | -0.83701900 | 2.02088100  |
| O  | -1.15764600 | -1.12967100 | 1.24242800  |
| O  | 0.74803200  | 0.95326800  | 1.29094600  |
| C  | 0.33346800  | 1.84467000  | 2.10413000  |
| C  | -2.50732000 | -1.91732400 | 3.03810300  |
| C  | -4.00634500 | -0.50684900 | -2.57519600 |
| C  | -0.21006000 | 3.81555800  | -2.55010500 |
| C  | 1.31908000  | 2.32123500  | 3.17624600  |
| C  | -2.78460100 | -3.25135800 | 2.27654500  |
| H  | -3.07507500 | -3.99322800 | 3.02805900  |
| H  | -1.84517500 | -3.58360500 | 1.82721000  |
| C  | -3.72521800 | -1.48619200 | 3.86225700  |
| H  | -3.97539200 | -2.27392000 | 4.58044500  |
| H  | -3.51464800 | -0.56940300 | 4.41950500  |
| H  | -4.59780900 | -1.30519800 | 3.23126100  |
| C  | -1.29273700 | -2.12616400 | 3.96653600  |
| H  | -1.52135400 | -2.90342600 | 4.70307000  |
| H  | -0.41127000 | -2.43251000 | 3.39742500  |
| H  | -1.05295300 | -1.20481300 | 4.50856000  |
| C  | -4.03659200 | -2.06278500 | -2.45400600 |

|   |             |             |             |
|---|-------------|-------------|-------------|
| H | -4.72453700 | -2.42991100 | -3.22323100 |
| H | -3.03871800 | -2.43832900 | -2.69610000 |
| C | -3.42651200 | -0.13436500 | -3.95537400 |
| H | -4.07418900 | -0.52715800 | -4.74602300 |
| H | -3.36810400 | 0.95304400  | -4.07394200 |
| H | -2.42425600 | -0.55036400 | -4.08635400 |
| C | -5.41029200 | 0.08748000  | -2.42294400 |
| H | -5.39023600 | 1.17313200  | -2.55011000 |
| H | -6.06970500 | -0.33481600 | -3.18821900 |
| H | -5.83643800 | -0.13069300 | -1.44180600 |
| C | 0.81194400  | 3.21284200  | -3.52225500 |
| H | 1.08743100  | 3.96456600  | -4.26908300 |
| H | 1.71820800  | 2.88470500  | -3.01051500 |
| H | 0.39012500  | 2.34921600  | -4.04427200 |
| C | -1.46468900 | 4.25840000  | -3.32537000 |
| H | -2.21613100 | 4.68080100  | -2.65418500 |
| H | -1.19149600 | 5.01729000  | -4.06569300 |
| H | -1.91233800 | 3.41137500  | -3.85636300 |
| C | 0.38972400  | 5.05296200  | -1.80978500 |
| H | 0.77564200  | 5.72971800  | -2.57950100 |
| H | -0.42683000 | 5.56942300  | -1.29689500 |
| C | 1.63759600  | 3.82507300  | 2.90128300  |
| H | 0.74076400  | 4.40891200  | 3.12777600  |
| H | 2.41363900  | 4.12361700  | 3.61406200  |
| C | 0.63998200  | 2.19875000  | 4.55291000  |
| H | 0.40038900  | 1.15347900  | 4.77619700  |
| H | 1.31590400  | 2.56607300  | 5.33195300  |
| H | -0.28424600 | 2.78023400  | 4.59072600  |
| C | 2.60113800  | 1.48039800  | 3.15467600  |
| H | 3.28632800  | 1.84335300  | 3.92785600  |
| H | 2.37921700  | 0.43012900  | 3.35710000  |
| H | 3.10630100  | 1.53680100  | 2.18936800  |
| C | -3.84655500 | -3.14913700 | 1.20653600  |
| C | -3.49352700 | -2.75914800 | -0.09189800 |
| C | -5.19650800 | -3.39962100 | 1.48587100  |
| C | -4.45381300 | -2.57346500 | -1.09458600 |
| H | -2.44861400 | -2.58713200 | -0.32059100 |
| C | -6.16352100 | -3.24939000 | 0.49017700  |
| H | -5.48765800 | -3.72176600 | 2.48182400  |
| C | -5.79742800 | -2.83064000 | -0.79003900 |
| H | -7.20592400 | -3.46027800 | 0.71254700  |
| H | -6.55484300 | -2.71056700 | -1.55965400 |
| C | 2.07870600  | 4.11986600  | 1.48698000  |
| C | 1.12547900  | 4.47803500  | 0.52616300  |

|    |             |             |             |
|----|-------------|-------------|-------------|
| C  | 3.41917100  | 4.01580900  | 1.09105500  |
| C  | 1.47100200  | 4.71814300  | -0.80947300 |
| H  | 0.08637300  | 4.56823000  | 0.82551600  |
| C  | 3.78387600  | 4.25953100  | -0.23449800 |
| H  | 4.17847800  | 3.76066100  | 1.82459700  |
| C  | 2.81760500  | 4.60657700  | -1.18098400 |
| H  | 4.82751800  | 4.19120200  | -0.52881300 |
| H  | 3.11061600  | 4.80682100  | -2.20757300 |
| C  | 2.80754000  | 0.53833600  | -0.78011000 |
| H  | 2.13964000  | 1.35361900  | -0.55510500 |
| H  | 3.85999500  | 0.75764200  | -0.91747600 |
| C  | 2.32634700  | -0.72917300 | -0.91860900 |
| C  | 0.92023500  | -0.99296300 | -0.85172200 |
| C  | 0.49666100  | -2.34809200 | -1.27144500 |
| O  | 0.35055100  | -3.25999600 | -0.47532100 |
| O  | 0.25036700  | -2.42735100 | -2.58205100 |
| C  | -0.26126200 | -3.69641400 | -3.05090800 |
| H  | -0.46720400 | -3.55119800 | -4.11048900 |
| H  | 0.48735700  | -4.47990600 | -2.91217100 |
| H  | -1.17551800 | -3.95912200 | -2.51514300 |
| O  | 3.12993600  | -1.80122500 | -1.18611600 |
| Si | 4.51908400  | -2.25475300 | -0.29258900 |
| C  | 4.19572300  | -1.79171400 | 1.52182400  |
| H  | 4.20390700  | -0.69153400 | 1.52808900  |
| C  | 4.68605600  | -4.10465300 | -0.65774700 |
| H  | 5.64735300  | -4.41354100 | -0.22205800 |
| C  | 6.01440800  | -1.26783400 | -0.94335000 |
| H  | 6.04353100  | -0.35275600 | -0.33197700 |
| C  | 5.88107100  | -0.83936400 | -2.41614600 |
| H  | 4.95785000  | -0.28580000 | -2.61120900 |
| H  | 6.72234900  | -0.19731700 | -2.70704300 |
| H  | 5.88673400  | -1.70459700 | -3.08683200 |
| C  | 7.34437800  | -2.01463100 | -0.72766200 |
| H  | 7.39004300  | -2.92163100 | -1.34052900 |
| H  | 8.19450400  | -1.38364300 | -1.01654300 |
| H  | 7.49796000  | -2.31322400 | 0.31415200  |
| C  | 2.83333900  | -2.23783400 | 2.07955200  |
| H  | 2.68867100  | -1.83410300 | 3.08952000  |
| H  | 1.99419000  | -1.89622400 | 1.46929100  |
| H  | 2.76112200  | -3.32639600 | 2.15247600  |
| C  | 5.34108900  | -2.26237400 | 2.43749900  |
| H  | 6.30844000  | -1.84550700 | 2.13983300  |
| H  | 5.15711500  | -1.95216500 | 3.47404600  |
| H  | 5.43379600  | -3.35485500 | 2.43807900  |

|   |            |             |             |
|---|------------|-------------|-------------|
| C | 3.57801200 | -4.95733500 | -0.01631800 |
| H | 3.67750200 | -6.00669900 | -0.32376900 |
| H | 3.62373700 | -4.93134500 | 1.07583300  |
| H | 2.58132400 | -4.61690300 | -0.31650900 |
| C | 4.75132500 | -4.36393900 | -2.17487700 |
| H | 5.59834200 | -3.85871800 | -2.64828300 |
| H | 4.85426800 | -5.43784800 | -2.37634400 |
| H | 3.83766100 | -4.02151400 | -2.67384800 |

17

|    |             |             |             |
|----|-------------|-------------|-------------|
| Rh | -2.80794800 | 1.63054100  | 0.70736000  |
| O  | -3.61675700 | -0.01477000 | 1.62575900  |
| O  | -1.83310200 | 2.08648600  | 2.47263900  |
| O  | -1.92594000 | 3.19118100  | -0.28575000 |
| O  | -3.66348500 | 1.05311900  | -1.06884300 |
| Rh | -0.87207300 | 0.27460200  | 0.09615600  |
| C  | -3.01234400 | 0.31396800  | -1.86646000 |
| O  | -1.83914400 | -0.14728900 | -1.65766100 |
| C  | -0.81603100 | 3.01547200  | -0.87671400 |
| O  | -0.12687900 | 1.94009500  | -0.84542700 |
| C  | -2.95275400 | -1.09472700 | 1.61973600  |
| O  | -1.81048200 | -1.25594300 | 1.07346100  |
| O  | -0.07085600 | 0.79683300  | 1.89767100  |
| C  | -0.70204000 | 1.55900000  | 2.70119700  |
| C  | -3.52137000 | -2.32821900 | 2.32793100  |
| C  | -3.64546400 | -0.06819400 | -3.20870000 |
| C  | -0.25381100 | 4.20425100  | -1.66498600 |
| C  | -0.01374300 | 1.87260000  | 4.03486000  |
| C  | -3.52703000 | -3.52275100 | 1.32358600  |
| H  | -3.94856100 | -4.38375000 | 1.85343600  |
| H  | -2.48813400 | -3.75629100 | 1.07660900  |
| C  | -4.92778300 | -2.05057400 | 2.86872200  |
| H  | -5.30977000 | -2.94774000 | 3.36698800  |
| H  | -4.91201700 | -1.23543900 | 3.59729400  |
| H  | -5.62218000 | -1.77765100 | 2.07129000  |
| C  | -2.56909200 | -2.67202800 | 3.49232400  |
| H  | -2.93609800 | -3.55887500 | 4.01941000  |
| H  | -1.55978400 | -2.87514900 | 3.12605600  |
| H  | -2.51840500 | -1.84654300 | 4.21064000  |
| C  | -3.64127200 | -1.62312600 | -3.33888800 |
| H  | -4.10675400 | -1.86556900 | -4.30027400 |
| H  | -2.59978300 | -1.95180900 | -3.38237100 |
| C  | -2.76030300 | 0.52076600  | -4.32631100 |
| H  | -3.18385000 | 0.26895700  | -5.30418100 |

|   |             |             |             |
|---|-------------|-------------|-------------|
| H | -2.70951100 | 1.61232200  | -4.25003100 |
| H | -1.74352800 | 0.12316400  | -4.27367800 |
| C | -5.06735700 | 0.49171800  | -3.32217400 |
| H | -5.06249100 | 1.58367000  | -3.26741900 |
| H | -5.49804200 | 0.19872900  | -4.28529500 |
| H | -5.71404800 | 0.11646300  | -2.52652100 |
| C | 0.89826600  | 3.76869100  | -2.57399700 |
| H | 1.26322400  | 4.63594500  | -3.13507900 |
| H | 1.72504500  | 3.34401800  | -2.00827100 |
| H | 0.56495600  | 3.01463000  | -3.29252200 |
| C | -1.37957100 | 4.82063700  | -2.51419700 |
| H | -2.22454100 | 5.12746800  | -1.89402200 |
| H | -0.99944800 | 5.69926400  | -3.04572100 |
| H | -1.74131900 | 4.10419100  | -3.25981700 |
| C | 0.23437000  | 5.26990800  | -0.62875300 |
| H | 0.78788400  | 6.03026900  | -1.19006300 |
| H | -0.64797100 | 5.75536000  | -0.20145400 |
| C | 0.43005800  | 3.37099900  | 4.00712600  |
| H | -0.46525200 | 3.99123400  | 4.10877400  |
| H | 1.04721200  | 3.53757600  | 4.89660300  |
| C | -1.02518500 | 1.67483400  | 5.17762800  |
| H | -1.34936200 | 0.63007700  | 5.23299400  |
| H | -0.55957000 | 1.93684900  | 6.13333700  |
| H | -1.90813000 | 2.30245700  | 5.03652500  |
| C | 1.19618900  | 0.95463200  | 4.25156100  |
| H | 1.66401400  | 1.19150300  | 5.21293600  |
| H | 0.88945500  | -0.09396800 | 4.26733300  |
| H | 1.94198600  | 1.07157300  | 3.46410800  |
| C | -4.29993700 | -3.26612800 | 0.05061300  |
| C | -3.66360600 | -2.66319800 | -1.04207300 |
| C | -5.65915900 | -3.58722900 | -0.06257500 |
| C | -4.35348100 | -2.34545100 | -2.21902400 |
| H | -2.61094300 | -2.42297600 | -0.96652000 |
| C | -6.35729100 | -3.30008800 | -1.23712100 |
| H | -6.16740300 | -4.07117100 | 0.76687100  |
| C | -5.71199600 | -2.67736800 | -2.30712000 |
| H | -7.40798100 | -3.56430500 | -1.31958700 |
| H | -6.26160800 | -2.45380700 | -3.21738000 |
| C | 1.17388900  | 3.78648600  | 2.75940200  |
| C | 0.45947900  | 4.34494300  | 1.69351200  |
| C | 2.55689900  | 3.61025000  | 2.61439700  |
| C | 1.07865000  | 4.71659200  | 0.49437300  |
| H | -0.61113100 | 4.49019300  | 1.79896500  |
| C | 3.19339600  | 3.98061800  | 1.42764700  |



|    |             |             |             |
|----|-------------|-------------|-------------|
| H  | 3.13704400  | 3.19894500  | 3.43540600  |
| C  | 2.46174800  | 4.52758100  | 0.37161400  |
| H  | 4.26798300  | 3.85202500  | 1.32933400  |
| H  | 2.96727500  | 4.82115800  | -0.54362100 |
| C  | 2.49351500  | 0.45244400  | 0.55785000  |
| H  | 1.81537300  | 1.28385300  | 0.66073800  |
| H  | 3.53188500  | 0.59762800  | 0.83084000  |
| C  | 2.04885400  | -0.74531500 | 0.08473600  |
| C  | 0.68696400  | -0.91704900 | -0.31288900 |
| C  | 0.33050100  | -2.26777100 | -0.81384300 |
| O  | 0.11944800  | -3.19070200 | -0.04399400 |
| O  | 0.19042400  | -2.34609500 | -2.13956700 |
| C  | -0.22953900 | -3.62983300 | -2.65235800 |
| H  | -0.31036700 | -3.49718100 | -3.73036400 |
| H  | 0.51439200  | -4.39500300 | -2.41888300 |
| H  | -1.19478700 | -3.91235200 | -2.22817900 |
| O  | 2.87618800  | -1.82290000 | -0.08397000 |
| Si | 3.91541600  | -2.52610200 | 1.07583100  |
| C  | 3.16200300  | -2.23694600 | 2.79425200  |
| H  | 3.18615200  | -1.14263700 | 2.91076000  |
| C  | 4.07375100  | -4.32495300 | 0.50325200  |
| H  | 4.93466800  | -4.73732800 | 1.04898300  |
| C  | 5.59778400  | -1.63172200 | 0.98810600  |
| H  | 5.52981700  | -0.81844800 | 1.72723500  |
| C  | 5.85569600  | -0.99014400 | -0.38441400 |
| H  | 5.01120100  | -0.37815200 | -0.70295300 |
| H  | 6.75166500  | -0.35754000 | -0.36536600 |
| H  | 6.01223400  | -1.74790700 | -1.15913000 |
| C  | 6.77809900  | -2.53414300 | 1.39041600  |
| H  | 6.92241500  | -3.33965800 | 0.66175200  |
| H  | 7.71249800  | -1.95959200 | 1.42784900  |
| H  | 6.63948000  | -2.99905000 | 2.37189600  |
| C  | 1.69881800  | -2.67715000 | 2.96691100  |
| H  | 1.31317400  | -2.32978600 | 3.93379900  |
| H  | 1.04482800  | -2.28769800 | 2.18452900  |
| H  | 1.60318400  | -3.76678200 | 2.95360200  |
| C  | 4.04899200  | -2.83357300 | 3.90276800  |
| H  | 5.06355800  | -2.42279900 | 3.88921900  |
| H  | 3.62342300  | -2.62219800 | 4.89218700  |
| H  | 4.12910400  | -3.92346300 | 3.81179900  |
| C  | 2.84634100  | -5.19331800 | 0.82402000  |
| H  | 2.97100700  | -6.20188200 | 0.40750300  |
| H  | 2.69454700  | -5.30194700 | 1.90183600  |
| H  | 1.93208800  | -4.76653000 | 0.40017300  |

|   |            |             |             |
|---|------------|-------------|-------------|
| C | 4.39766000 | -4.38580000 | -1.00185400 |
| H | 5.31775600 | -3.84888700 | -1.25271600 |
| H | 4.52404500 | -5.42629700 | -1.32735800 |
| H | 3.58670100 | -3.94890300 | -1.59521400 |
| C | 3.01770400 | 0.81241700  | -2.73546900 |
| C | 3.77763500 | -0.80627600 | -4.26181800 |
| C | 1.87486200 | 0.22465400  | -3.10635100 |
| H | 4.14503000 | -0.63891300 | -5.27626700 |
| H | 4.22158900 | -1.72724600 | -3.87339200 |
| H | 0.88794500 | 0.44994200  | -2.73498700 |
| C | 2.21427400 | -0.81851600 | -4.16440900 |
| H | 1.85461900 | -1.80992000 | -3.87828900 |
| H | 1.76162600 | -0.57697900 | -5.13400100 |
| O | 3.38666600 | 1.77081400  | -1.85298800 |
| C | 4.80119900 | 2.03158300  | -2.05130100 |
| H | 4.92974300 | 3.03707800  | -2.46571800 |
| H | 5.31942000 | 1.96018700  | -1.09346600 |
| C | 5.28309400 | 0.96085100  | -3.04371900 |
| O | 6.42903200 | 0.76233700  | -3.42159100 |
| N | 4.14464800 | 0.31517400  | -3.39477000 |

**TS11**

|    |            |             |             |
|----|------------|-------------|-------------|
| Rh | 2.86701400 | 1.62317300  | 0.10645300  |
| O  | 3.62713300 | 0.51576100  | -1.43537700 |
| O  | 2.02284000 | 2.86661700  | -1.30695300 |
| O  | 2.00691300 | 2.65441100  | 1.66162600  |
| O  | 3.58326800 | 0.26733900  | 1.48096500  |
| Rh | 0.83391100 | 0.26333000  | -0.02367800 |
| C  | 2.88105800 | -0.74017200 | 1.78933700  |
| O  | 1.72484500 | -1.00601700 | 1.31430400  |
| C  | 0.86335700 | 2.29593200  | 2.08052700  |
| O  | 0.15802100 | 1.35586200  | 1.58780300  |
| C  | 2.90487100 | -0.36814400 | -1.98473600 |
| O  | 1.72383600 | -0.68864300 | -1.62090300 |
| O  | 0.12455600 | 1.64121200  | -1.35121700 |
| C  | 0.86146500 | 2.60176200  | -1.74700600 |
| C  | 3.47483400 | -1.12354500 | -3.19072800 |
| C  | 3.42461500 | -1.73994100 | 2.81538900  |
| C  | 0.28797900 | 3.07792300  | 3.27050500  |
| C  | 0.28372000 | 3.51995400  | -2.83127200 |
| C  | 3.53267100 | -2.64404900 | -2.84697800 |
| H  | 4.00569500 | -3.14668200 | -3.69749500 |
| H  | 2.50688100 | -3.01000300 | -2.78014200 |
| C  | 4.86785000 | -0.59650200 | -3.55347100 |

|   |             |             |             |
|---|-------------|-------------|-------------|
| H | 5.25165000  | -1.14939400 | -4.41729700 |
| H | 4.82977800  | 0.46449700  | -3.81560300 |
| H | 5.57196500  | -0.71432200 | -2.72747100 |
| C | 2.51152200  | -0.92429100 | -4.37733700 |
| H | 2.88528800  | -1.46524600 | -5.25305800 |
| H | 1.51159300  | -1.29352200 | -4.13733400 |
| H | 2.43325600  | 0.13601900  | -4.64132600 |
| C | 3.45286600  | -3.15717400 | 2.16147300  |
| H | 3.88268700  | -3.84192600 | 2.90060400  |
| H | 2.41914600  | -3.46862500 | 1.98613800  |
| C | 2.44957800  | -1.76869400 | 4.00986800  |
| H | 2.80452000  | -2.48336300 | 4.75974000  |
| H | 2.38513000  | -0.78322900 | 4.48382100  |
| H | 1.44621400  | -2.06458000 | 3.69327300  |
| C | 4.82090200  | -1.32738900 | 3.29343200  |
| H | 4.79455100  | -0.34612800 | 3.77502000  |
| H | 5.18710900  | -2.05729500 | 4.02294300  |
| H | 5.53278600  | -1.27822200 | 2.46709100  |
| C | -1.01493700 | 2.44919500  | 3.77222700  |
| H | -1.41529200 | 3.05152700  | 4.59466800  |
| H | -1.76629900 | 2.38803300  | 2.98410200  |
| H | -0.83339700 | 1.43725300  | 4.13473700  |
| C | 1.32903300  | 3.07367400  | 4.40570100  |
| H | 2.27461500  | 3.51188600  | 4.07794100  |
| H | 0.95220700  | 3.65211000  | 5.25587000  |
| H | 1.52297800  | 2.05202000  | 4.75040900  |
| C | 0.05173300  | 4.55210900  | 2.81358800  |
| H | -0.44982100 | 5.06650700  | 3.64049700  |
| H | 1.02782100  | 5.02568000  | 2.67563200  |
| C | 0.01905800  | 4.91956500  | -2.19048800 |
| H | 0.98624700  | 5.39549500  | -2.00406800 |
| H | -0.50527200 | 5.52222100  | -2.93993300 |
| C | 1.32552000  | 3.67719300  | -3.95375600 |
| H | 1.53814600  | 2.71132000  | -4.42462600 |
| H | 0.93878700  | 4.35247800  | -4.72413800 |
| H | 2.26265100  | 4.08693900  | -3.56967200 |
| C | -1.00857000 | 2.92975100  | -3.40685400 |
| H | -1.40758300 | 3.60294600  | -4.17317600 |
| H | -0.81567200 | 1.95858700  | -3.86867000 |
| H | -1.76844500 | 2.78522500  | -2.63796800 |
| C | 4.26568500  | -2.97924200 | -1.56938000 |
| C | 3.57699300  | -2.97561700 | -0.34899000 |
| C | 5.63553600  | -3.27344700 | -1.56473400 |
| C | 4.22605700  | -3.23428000 | 0.86517300  |

|    |             |             |             |
|----|-------------|-------------|-------------|
| H  | 2.51598700  | -2.75355500 | -0.34121900 |
| C  | 6.29402700  | -3.55107300 | -0.36534700 |
| H  | 6.18303200  | -3.29597100 | -2.50294600 |
| C  | 5.59592400  | -3.52928100 | 0.84338900  |
| H  | 7.35361000  | -3.79136200 | -0.37334000 |
| H  | 6.11264200  | -3.75089100 | 1.77310100  |
| C  | -0.76580400 | 4.87433600  | -0.90140100 |
| C  | -0.07987100 | 4.78921400  | 0.31586700  |
| C  | -2.16673500 | 4.87479500  | -0.87999600 |
| C  | -0.74904400 | 4.69246600  | 1.54090000  |
| H  | 1.00523900  | 4.78844800  | 0.30892900  |
| C  | -2.85242500 | 4.78878100  | 0.33357300  |
| H  | -2.71939500 | 4.95655000  | -1.81153300 |
| C  | -2.15082600 | 4.69747100  | 1.53741800  |
| H  | -3.93894700 | 4.80523600  | 0.34185800  |
| H  | -2.69187100 | 4.64621200  | 2.47791000  |
| C  | -2.52322500 | 0.84882900  | 0.23117200  |
| H  | -1.73413000 | 1.52424900  | 0.52047400  |
| H  | -3.54738800 | 1.20158400  | 0.27889300  |
| C  | -2.22830600 | -0.40620500 | -0.19109500 |
| C  | -0.85863900 | -0.86854900 | -0.27812100 |
| C  | -0.64843100 | -2.01311200 | -1.20956400 |
| O  | -1.00316500 | -1.93725800 | -2.37599100 |
| O  | 0.04223800  | -3.05060900 | -0.71853000 |
| C  | 0.23173800  | -4.16300800 | -1.61306100 |
| H  | 0.96597300  | -4.80646100 | -1.12980500 |
| H  | -0.71160300 | -4.70049000 | -1.74433200 |
| H  | 0.59312600  | -3.82630800 | -2.58418100 |
| O  | -3.19315400 | -1.31180000 | -0.54078900 |
| Si | -4.64895500 | -1.06693800 | -1.39856500 |
| C  | -4.41856100 | 0.29451500  | -2.70507300 |
| H  | -4.19134600 | 1.19500300  | -2.11478400 |
| C  | -5.05187600 | -2.79452700 | -2.06687800 |
| H  | -6.09165000 | -2.74052100 | -2.41934300 |
| C  | -6.00538400 | -0.46969400 | -0.19276700 |
| H  | -6.02065200 | 0.62499600  | -0.30752600 |
| C  | -5.69723800 | -0.77576400 | 1.27957000  |
| H  | -4.72987700 | -0.36858200 | 1.58121600  |
| H  | -6.46223300 | -0.34669200 | 1.93922800  |
| H  | -5.67593100 | -1.85313400 | 1.47037300  |
| C  | -7.40432800 | -0.99498400 | -0.56486300 |
| H  | -7.46834500 | -2.07934600 | -0.42233300 |
| H  | -8.17203700 | -0.53801200 | 0.07275500  |
| H  | -7.67333400 | -0.78373700 | -1.60464100 |

|   |             |             |             |
|---|-------------|-------------|-------------|
| C | -3.26158200 | 0.09646500  | -3.69590400 |
| H | -3.12207400 | 1.00262300  | -4.29832600 |
| H | -2.32084100 | -0.13431800 | -3.19387500 |
| H | -3.46960900 | -0.72312400 | -4.39037200 |
| C | -5.73898800 | 0.55628400  | -3.45388800 |
| H | -6.55221300 | 0.84431900  | -2.78047700 |
| H | -5.61444800 | 1.36872300  | -4.18142300 |
| H | -6.06539300 | -0.32922000 | -4.01279700 |
| C | -4.17265700 | -3.23628300 | -3.24858600 |
| H | -4.38620900 | -4.27984200 | -3.51669600 |
| H | -4.35341200 | -2.62786500 | -4.13886900 |
| H | -3.10714500 | -3.16257600 | -3.00843100 |
| C | -4.99204400 | -3.83996800 | -0.93849900 |
| H | -5.61955100 | -3.56960200 | -0.08326900 |
| H | -5.32774100 | -4.82089900 | -1.29884400 |
| H | -3.96557400 | -3.95583000 | -0.57597500 |
| C | -1.87498500 | -1.73557800 | 2.63009200  |
| C | -3.05989100 | -3.74375900 | 2.34826400  |
| C | -1.03865600 | -2.43787200 | 1.82817200  |
| H | -3.07594400 | -4.47925700 | 3.15692300  |
| H | -3.94157300 | -3.88515100 | 1.72300300  |
| H | 0.00143700  | -2.21137600 | 1.65947300  |
| C | -1.72659200 | -3.76866600 | 1.53264400  |
| H | -1.94155400 | -3.88193400 | 0.46781300  |
| H | -1.10353900 | -4.61974100 | 1.82547800  |
| O | -1.84665900 | -0.53455900 | 3.21511400  |
| C | -3.05196800 | -0.40002700 | 4.01851100  |
| H | -2.77132800 | -0.27934500 | 5.06838000  |
| H | -3.61386600 | 0.47327300  | 3.68210600  |
| C | -3.83237200 | -1.70109700 | 3.79794400  |
| O | -4.89110000 | -2.03506800 | 4.30099100  |
| N | -3.05728600 | -2.39391700 | 2.91426000  |

**18**

|    |            |             |             |
|----|------------|-------------|-------------|
| Rh | 3.10805000 | 0.29067600  | 0.69627000  |
| O  | 2.41609300 | 1.74913100  | 1.97107100  |
| O  | 2.69850900 | -1.06813900 | 2.16480700  |
| O  | 3.61935000 | -1.20341100 | -0.64614600 |
| O  | 3.44039400 | 1.67778600  | -0.76259800 |
| Rh | 0.80465200 | 0.06923200  | -0.11609400 |
| C  | 2.49685700 | 1.97650500  | -1.55644200 |
| O  | 1.32101800 | 1.48912200  | -1.52681900 |
| C  | 2.71988700 | -1.71718900 | -1.38227300 |
| O  | 1.49409800 | -1.37620500 | -1.40149800 |

|   |             |             |             |
|---|-------------|-------------|-------------|
| C | 1.17334600  | 2.01306200  | 2.00313200  |
| O | 0.28225200  | 1.49536000  | 1.25642100  |
| O | 0.59614700  | -1.35884700 | 1.39089700  |
| C | 1.53671600  | -1.58080900 | 2.21546600  |
| C | 0.67532600  | 3.04692800  | 3.02202800  |
| C | 2.78731100  | 3.00747100  | -2.65516500 |
| C | 3.14864800  | -2.83763400 | -2.34083500 |
| C | 1.28443600  | -2.54701800 | 3.38217700  |
| C | 0.05443900  | 4.24574100  | 2.23701100  |
| H | -0.23622000 | 5.00011000  | 2.97671200  |
| H | -0.85589900 | 3.88960500  | 1.75033900  |
| C | 1.81699800  | 3.51697400  | 3.92977600  |
| H | 1.43810000  | 4.25618400  | 4.64386700  |
| H | 2.23561600  | 2.67934500  | 4.49514100  |
| H | 2.62694700  | 3.97297300  | 3.35731000  |
| C | -0.43284900 | 2.39163700  | 3.86861900  |
| H | -0.83791600 | 3.11809200  | 4.58149900  |
| H | -1.24612400 | 2.03075500  | 3.23509600  |
| H | -0.03676700 | 1.54285700  | 4.43761000  |
| C | 1.82412300  | 4.21996300  | -2.46760800 |
| H | 2.09607400  | 4.96810600  | -3.22054100 |
| H | 0.81211200  | 3.87925500  | -2.69136800 |
| C | 2.49592800  | 2.34736600  | -4.01658500 |
| H | 2.63989700  | 3.07300300  | -4.82436700 |
| H | 3.17646700  | 1.50655900  | -4.19114900 |
| H | 1.47142000  | 1.97320100  | -4.05736000 |
| C | 4.24959600  | 3.46510200  | -2.60480200 |
| H | 4.92857500  | 2.62101000  | -2.75454700 |
| H | 4.43051000  | 4.19550800  | -3.40087500 |
| H | 4.49657400  | 3.92912900  | -1.64797500 |
| C | 1.94457500  | -3.39413500 | -3.11044600 |
| H | 2.27727600  | -4.19231900 | -3.78268300 |
| H | 1.19098300  | -3.80402900 | -2.43490900 |
| H | 1.47272300  | -2.61420200 | -3.71432300 |
| C | 4.16891800  | -2.24433000 | -3.33243700 |
| H | 5.03729800  | -1.83889800 | -2.80672000 |
| H | 4.51182000  | -3.02039000 | -4.02485500 |
| H | 3.71501100  | -1.43964000 | -3.92104900 |
| C | 3.84764300  | -3.96668200 | -1.52399600 |
| H | 4.12614700  | -4.75211200 | -2.23500800 |
| H | 4.77262000  | -3.55739700 | -1.10821800 |
| C | 2.28793600  | -3.73636600 | 3.25722900  |
| H | 3.29383600  | -3.34682400 | 3.43719600  |
| H | 2.05860600  | -4.44114700 | 4.06378900  |

|    |             |             |             |
|----|-------------|-------------|-------------|
| C  | 1.57023500  | -1.79257600 | 4.69517400  |
| H  | 0.88900000  | -0.94211100 | 4.80925600  |
| H  | 1.42297400  | -2.46237200 | 5.54907200  |
| H  | 2.59565100  | -1.41646300 | 4.71854800  |
| C  | -0.15762100 | -3.05812200 | 3.39356300  |
| H  | -0.30139400 | -3.73111600 | 4.24537100  |
| H  | -0.86929600 | -2.23376700 | 3.48421100  |
| H  | -0.38789800 | -3.60766300 | 2.48210500  |
| C  | 0.96836200  | 4.85178400  | 1.19915400  |
| C  | 0.96105000  | 4.34687800  | -0.10768000 |
| C  | 1.85560600  | 5.88977400  | 1.51386200  |
| C  | 1.83600500  | 4.83384500  | -1.08777500 |
| H  | 0.26202000  | 3.55757400  | -0.36631600 |
| C  | 2.72065300  | 6.39819800  | 0.54323100  |
| H  | 1.85991400  | 6.30651900  | 2.51734700  |
| C  | 2.71615800  | 5.87044000  | -0.74933800 |
| H  | 3.39552000  | 7.21253500  | 0.79278200  |
| H  | 3.38782000  | 6.27294800  | -1.50271000 |
| C  | 2.26052400  | -4.44593200 | 1.92262600  |
| C  | 3.03580000  | -3.96059000 | 0.86153200  |
| C  | 1.46595400  | -5.57901300 | 1.70429900  |
| C  | 3.01650300  | -4.55448900 | -0.40598600 |
| H  | 3.66617700  | -3.09432000 | 1.02470000  |
| C  | 1.45189100  | -6.20033700 | 0.45282200  |
| H  | 0.87489200  | -5.98621400 | 2.52016400  |
| C  | 2.21384100  | -5.68738700 | -0.59934400 |
| H  | 0.85354300  | -7.09488000 | 0.30053000  |
| H  | 2.20324200  | -6.17940700 | -1.56814200 |
| C  | -2.32449400 | -0.61218300 | 1.30438800  |
| H  | -1.35668900 | -0.88452600 | 1.69130200  |
| H  | -3.19115900 | -0.72449600 | 1.94715400  |
| C  | -2.43844800 | -0.13296200 | 0.05738100  |
| C  | -1.32167800 | -0.05256600 | -0.96252900 |
| C  | -1.40656600 | 1.22076800  | -1.71620700 |
| O  | -1.70883700 | 2.31054300  | -1.24867100 |
| O  | -1.11807100 | 1.08061600  | -3.04300600 |
| C  | -1.33610000 | 2.23774100  | -3.85599000 |
| H  | -0.97340400 | 1.97782500  | -4.85132800 |
| H  | -2.40400400 | 2.47521500  | -3.90300200 |
| H  | -0.79856000 | 3.10512500  | -3.47382100 |
| O  | -3.66108000 | 0.22461700  | -0.47156900 |
| Si | -5.06068000 | 0.76990500  | 0.32893500  |
| C  | -4.60480100 | 2.01734000  | 1.68875100  |
| H  | -4.09661100 | 1.40525200  | 2.44737800  |

|   |             |             |             |
|---|-------------|-------------|-------------|
| C | -6.08213400 | 1.46963300  | -1.10567600 |
| H | -7.07275000 | 1.71144300  | -0.69518600 |
| C | -5.96664100 | -0.68566100 | 1.18118600  |
| H | -5.63599900 | -0.64106400 | 2.22996100  |
| C | -5.58586600 | -2.07279200 | 0.64034300  |
| H | -4.50390400 | -2.22843300 | 0.64811000  |
| H | -6.04185100 | -2.86751100 | 1.24523400  |
| H | -5.94117200 | -2.21121300 | -0.38622200 |
| C | -7.49705200 | -0.51219100 | 1.17195400  |
| H | -7.89608500 | -0.57567900 | 0.15374900  |
| H | -7.98165800 | -1.30146700 | 1.76127000  |
| H | -7.81445300 | 0.44878200  | 1.58867700  |
| C | -3.62736700 | 3.12804800  | 1.27456000  |
| H | -3.27688300 | 3.67154600  | 2.16176700  |
| H | -2.76031500 | 2.74017000  | 0.73650200  |
| H | -4.11162400 | 3.86177200  | 0.62126000  |
| C | -5.86432500 | 2.61097000  | 2.34764400  |
| H | -6.51187500 | 1.84249800  | 2.78227100  |
| H | -5.58706900 | 3.29895700  | 3.15693100  |
| H | -6.46308900 | 3.18446300  | 1.62943300  |
| C | -5.48162700 | 2.75644400  | -1.69778000 |
| H | -6.03612100 | 3.06703300  | -2.59350800 |
| H | -5.51662100 | 3.58648000  | -0.98668200 |
| H | -4.43405200 | 2.61434000  | -1.98504100 |
| C | -6.27461400 | 0.41336600  | -2.20970000 |
| H | -6.72480100 | -0.51061000 | -1.83224800 |
| H | -6.92654000 | 0.79636100  | -3.00559400 |
| H | -5.31539200 | 0.15265000  | -2.66919400 |
| C | -1.59016800 | -2.53432400 | -1.21786000 |
| C | -3.59628800 | -2.39042800 | -2.42816800 |
| C | -1.39468300 | -1.26375500 | -1.94909800 |
| H | -3.95497200 | -3.08088200 | -3.19200400 |
| H | -4.43816200 | -1.95787400 | -1.89149600 |
| H | -0.44489700 | -1.31699500 | -2.48272300 |
| C | -2.60952200 | -1.32350900 | -2.95288200 |
| H | -3.10029000 | -0.35864400 | -3.03313400 |
| H | -2.24149300 | -1.60877800 | -3.94047400 |
| O | -0.83713700 | -3.18144800 | -0.38509900 |
| C | -1.57588300 | -4.37250200 | 0.04686900  |
| H | -0.97491200 | -5.24906700 | -0.19598100 |
| H | -1.73661900 | -4.29872000 | 1.12305800  |
| C | -2.88744400 | -4.30884200 | -0.72108200 |
| O | -3.82943700 | -5.05787300 | -0.71735000 |
| N | -2.75527100 | -3.12120800 | -1.46786500 |



**TS12**

|    |             |             |             |
|----|-------------|-------------|-------------|
| Rh | 2.32614100  | 2.02630100  | 0.66042200  |
| O  | 0.94682700  | 2.90929400  | 1.87576100  |
| O  | 2.70710200  | 0.69777400  | 2.17386200  |
| O  | 3.62123700  | 1.04468100  | -0.61203500 |
| O  | 1.80921700  | 3.32549200  | -0.83678500 |
| Rh | 0.56309400  | 0.52114400  | -0.11303500 |
| C  | 0.86243000  | 3.00802000  | -1.62077500 |
| O  | 0.20978800  | 1.91645900  | -1.58487500 |
| C  | 3.18785900  | 0.06520000  | -1.29783700 |
| O  | 1.98450300  | -0.34271900 | -1.31789300 |
| C  | -0.23538500 | 2.44721000  | 1.92512700  |
| O  | -0.68408900 | 1.47639200  | 1.23093000  |
| O  | 1.10069400  | -0.71692800 | 1.45327200  |
| C  | 2.02089900  | -0.36937700 | 2.25788000  |
| C  | -1.20575400 | 3.10264300  | 2.91597600  |
| C  | 0.46704900  | 4.00004100  | -2.72175500 |
| C  | 4.19866800  | -0.67293400 | -2.18738700 |
| C  | 2.33865200  | -1.28870700 | 3.44531600  |
| C  | -2.50187900 | 3.50163200  | 2.14614400  |
| H  | -3.19063500 | 3.94539400  | 2.87331400  |
| H  | -2.96466000 | 2.59080700  | 1.76054900  |
| C  | -0.56797000 | 4.32754000  | 3.58400400  |
| H  | -1.28629600 | 4.77809400  | 4.27756400  |
| H  | 0.32119000  | 4.04171400  | 4.15188500  |
| H  | -0.27391700 | 5.08367200  | 2.85408400  |
| C  | -1.53734600 | 2.05708900  | 3.99920400  |
| H  | -2.28727700 | 2.45738800  | 4.69012800  |
| H  | -1.92344400 | 1.13787100  | 3.55958900  |
| H  | -0.64046100 | 1.81199100  | 4.57871900  |
| C  | -1.06333900 | 4.28140600  | -2.61769600 |
| H  | -1.32036100 | 4.96588300  | -3.43372700 |
| H  | -1.58617300 | 3.33968700  | -2.79134400 |
| C  | 0.75424500  | 3.32238500  | -4.07735200 |
| H  | 0.44994400  | 3.98187000  | -4.89713400 |
| H  | 1.82463500  | 3.11603900  | -4.18750700 |
| H  | 0.21154700  | 2.37908500  | -4.16538400 |
| C  | 1.27382200  | 5.29846800  | -2.61241900 |
| H  | 2.34496400  | 5.10292900  | -2.71206600 |
| H  | 0.97493700  | 5.98246200  | -3.41411300 |
| H  | 1.10987500  | 5.79846600  | -1.65563300 |
| C  | 3.55841200  | -1.90099900 | -2.84626500 |
| H  | 4.30582800  | -2.42116600 | -3.45475500 |

|   |             |             |             |
|---|-------------|-------------|-------------|
| H | 3.17016700  | -2.59834800 | -2.10155300 |
| H | 2.73253900  | -1.60710100 | -3.49974500 |
| C | 4.66681600  | 0.31630300  | -3.27398900 |
| H | 5.13679000  | 1.19720500  | -2.82831800 |
| H | 5.39378800  | -0.17013300 | -3.93285900 |
| H | 3.82145100  | 0.64870500  | -3.88637600 |
| C | 5.43177600  | -1.08890000 | -1.32964900 |
| H | 6.14109600  | -1.57954400 | -2.00469100 |
| H | 5.90836800  | -0.17597200 | -0.96186900 |
| C | 3.86234600  | -1.62146000 | 3.43005300  |
| H | 4.41096400  | -0.69237400 | 3.60885900  |
| H | 4.05602400  | -2.28569100 | 4.27912200  |
| C | 2.01365500  | -0.50847400 | 4.73510600  |
| H | 0.95049500  | -0.24726100 | 4.77157500  |
| H | 2.24260500  | -1.12517100 | 5.61066300  |
| H | 2.59766100  | 0.41335000  | 4.79540300  |
| C | 1.50571400  | -2.57239100 | 3.39928900  |
| H | 1.75962500  | -3.20406900 | 4.25697200  |
| H | 0.43649200  | -2.34983000 | 3.44214400  |
| H | 1.69894600  | -3.13664800 | 2.48722700  |
| C | -2.24750400 | 4.46676900  | 1.00985600  |
| C | -1.86857900 | 3.98333000  | -0.25013500 |
| C | -2.32264800 | 5.85316600  | 1.20114200  |
| C | -1.52303400 | 4.85035600  | -1.29569500 |
| H | -1.83904800 | 2.91303400  | -0.42241700 |
| C | -2.00752400 | 6.72953600  | 0.16127300  |
| H | -2.63201800 | 6.24537800  | 2.16622500  |
| C | -1.60020200 | 6.23260900  | -1.07800000 |
| H | -2.07942300 | 7.80255500  | 0.31740000  |
| H | -1.35301400 | 6.91863400  | -1.88378100 |
| C | 4.36157200  | -2.25959600 | 2.15290800  |
| C | 4.69298300  | -1.45615700 | 1.05383700  |
| C | 4.50414900  | -3.64785100 | 2.03025100  |
| C | 5.12317600  | -1.99948800 | -0.16232400 |
| H | 4.60967900  | -0.38051000 | 1.14676300  |
| C | 4.96135400  | -4.20750900 | 0.83443800  |
| H | 4.27390200  | -4.28877600 | 2.87718900  |
| C | 5.25656700  | -3.39156500 | -0.26011700 |
| H | 5.08973000  | -5.28383800 | 0.75615400  |
| H | 5.61038300  | -3.83370000 | -1.18758900 |
| C | -1.27820500 | -2.48414600 | 0.78257900  |
| H | -0.33784800 | -2.19650200 | 1.22732100  |
| H | -1.87179300 | -3.23271000 | 1.29795200  |
| C | -1.88288100 | -1.60494700 | -0.09588800 |

|    |             |             |             |
|----|-------------|-------------|-------------|
| C  | -1.04436000 | -0.87075400 | -1.07470800 |
| C  | -1.79461900 | 0.08283000  | -1.92038500 |
| O  | -2.66101400 | 0.86410600  | -1.55605000 |
| O  | -1.41383000 | 0.00872100  | -3.22904600 |
| C  | -2.18773500 | 0.78057800  | -4.15361600 |
| H  | -1.78554600 | 0.54932400  | -5.14117000 |
| H  | -3.24341800 | 0.49759800  | -4.10462500 |
| H  | -2.09765600 | 1.84945400  | -3.95854800 |
| O  | -3.19288300 | -1.59638800 | -0.32703100 |
| Si | -4.58919700 | -2.16011700 | 0.49977300  |
| C  | -4.58622500 | -1.40671000 | 2.23683800  |
| H  | -3.89333700 | -2.03035100 | 2.82097700  |
| C  | -5.96129500 | -1.52581800 | -0.64024100 |
| H  | -6.90475000 | -1.92076500 | -0.23657400 |
| C  | -4.56755800 | -4.06124200 | 0.60910100  |
| H  | -4.07857500 | -4.29133300 | 1.56728700  |
| C  | -3.75509200 | -4.74609900 | -0.50218700 |
| H  | -2.71321200 | -4.42199500 | -0.49714200 |
| H  | -3.76394900 | -5.83580500 | -0.37082700 |
| H  | -4.16753200 | -4.53456700 | -1.49389700 |
| C  | -5.99691700 | -4.63372600 | 0.66540800  |
| H  | -6.52812400 | -4.46622800 | -0.27790500 |
| H  | -5.97123400 | -5.71703300 | 0.83763200  |
| H  | -6.59771000 | -4.18931700 | 1.46560300  |
| C  | -4.05269500 | 0.03274000  | 2.27108100  |
| H  | -4.03280000 | 0.40368500  | 3.30267900  |
| H  | -3.03931200 | 0.10439200  | 1.86827100  |
| H  | -4.68259800 | 0.71554800  | 1.69409900  |
| C  | -5.97406900 | -1.50217700 | 2.89729900  |
| H  | -6.33101900 | -2.53486800 | 2.97125400  |
| H  | -5.94497200 | -1.09319600 | 3.91517700  |
| H  | -6.72333300 | -0.92954600 | 2.33882600  |
| C  | -6.04985100 | 0.01063500  | -0.66293300 |
| H  | -6.81281000 | 0.33895400  | -1.38119100 |
| H  | -6.32441400 | 0.41866700  | 0.31389000  |
| H  | -5.09494200 | 0.45629900  | -0.96096400 |
| C  | -5.79173200 | -2.06839300 | -2.07128800 |
| H  | -5.80982900 | -3.16175700 | -2.10865500 |
| H  | -6.59831100 | -1.70268500 | -2.71952500 |
| H  | -4.84372400 | -1.73224700 | -2.50549200 |
| C  | 0.13782000  | -3.09246900 | -0.94303300 |
| C  | -0.95427400 | -4.28820600 | -2.68404300 |
| C  | -0.33904200 | -1.99026400 | -1.86312400 |
| H  | -0.31281400 | -4.64896700 | -3.49253400 |

|   |             |             |             |
|---|-------------|-------------|-------------|
| H | -1.82905700 | -4.93454900 | -2.60951500 |
| H | 0.53830100  | -1.63025600 | -2.40426100 |
| C | -1.30020100 | -2.79117700 | -2.81815500 |
| H | -2.33477700 | -2.62533600 | -2.51318700 |
| H | -1.19536100 | -2.45152700 | -3.84610700 |
| O | 1.26507300  | -3.13929700 | -0.23754700 |
| C | 1.56788900  | -4.53441500 | 0.02337400  |
| H | 2.63147100  | -4.69328600 | -0.14825300 |
| H | 1.31284300  | -4.77360100 | 1.06066600  |
| C | 0.68463300  | -5.29886100 | -0.95011600 |
| O | 0.70956000  | -6.46943900 | -1.26030200 |
| N | -0.17378400 | -4.32430900 | -1.44249500 |

**19**

|    |             |             |             |
|----|-------------|-------------|-------------|
| Rh | 1.71356100  | -2.28427900 | 1.01857100  |
| O  | 2.84290300  | -0.92283000 | 2.02751600  |
| O  | 0.28737800  | -2.18914200 | 2.48961200  |
| O  | 0.57050600  | -3.59128000 | -0.05826300 |
| O  | 3.07336800  | -2.29412600 | -0.50576000 |
| Rh | 0.58948300  | -0.48172900 | -0.06359700 |
| C  | 2.92119200  | -1.47546000 | -1.46855800 |
| O  | 2.00539600  | -0.59347200 | -1.53516100 |
| C  | -0.30159800 | -3.13031200 | -0.86557600 |
| O  | -0.50004500 | -1.89357700 | -1.07784200 |
| C  | 2.65320200  | 0.31908900  | 1.82145800  |
| O  | 1.77224000  | 0.79930100  | 1.03444800  |
| O  | -0.78600200 | -0.49927900 | 1.45042900  |
| C  | -0.66731900 | -1.34945000 | 2.38890500  |
| C  | 3.53864500  | 1.31121600  | 2.58481100  |
| C  | 3.89035900  | -1.55218200 | -2.65129100 |
| C  | -1.13369800 | -4.15407300 | -1.64475800 |
| C  | -1.71938100 | -1.35673900 | 3.50410100  |
| C  | 4.24056300  | 2.25852700  | 1.56286400  |
| H  | 4.85183900  | 2.95618300  | 2.14549100  |
| H  | 3.46830300  | 2.84246000  | 1.05638300  |
| C  | 4.57029200  | 0.57369900  | 3.44614800  |
| H  | 5.19257200  | 1.30612700  | 3.97083700  |
| H  | 4.07742300  | -0.05377300 | 4.19362200  |
| H  | 5.22184200  | -0.06330900 | 2.84502000  |
| C  | 2.62228000  | 2.16119100  | 3.48488200  |
| H  | 3.22490800  | 2.87400400  | 4.05732400  |
| H  | 1.90198500  | 2.71698300  | 2.88565700  |
| H  | 2.07373500  | 1.53201700  | 4.19399900  |
| C  | 4.56619000  | -0.15872600 | -2.83913000 |

|   |             |             |             |
|---|-------------|-------------|-------------|
| H | 5.28506600  | -0.25944000 | -3.65912200 |
| H | 3.79825400  | 0.54799900  | -3.16073100 |
| C | 3.05730900  | -1.87107200 | -3.91000100 |
| H | 3.71306300  | -1.91229200 | -4.78591800 |
| H | 2.56068700  | -2.84246400 | -3.81116800 |
| H | 2.29199700  | -1.10940900 | -4.07822500 |
| C | 4.94327000  | -2.64377600 | -2.42984800 |
| H | 4.47332800  | -3.62511600 | -2.32268900 |
| H | 5.61654100  | -2.67835400 | -3.29259900 |
| H | 5.54000000  | -2.45452700 | -1.53511500 |
| C | -2.25569600 | -3.47113100 | -2.43563600 |
| H | -2.85161200 | -4.23356300 | -2.94802800 |
| H | -2.91407800 | -2.89192900 | -1.78517600 |
| H | -1.84451600 | -2.79847900 | -3.19263500 |
| C | -0.17181200 | -4.87166400 | -2.61545400 |
| H | 0.63130700  | -5.37906200 | -2.07392600 |
| H | -0.72357300 | -5.61681000 | -3.19790000 |
| H | 0.27722500  | -4.15835700 | -3.31480800 |
| C | -1.71890000 | -5.20472900 | -0.65261000 |
| H | -2.26822100 | -5.93686100 | -1.25354600 |
| H | -0.88301700 | -5.72942800 | -0.18150900 |
| C | -2.20342800 | -2.81708400 | 3.75332500  |
| H | -1.34319900 | -3.41153800 | 4.07344200  |
| H | -2.90712100 | -2.77876200 | 4.59153200  |
| C | -1.02548800 | -0.83868200 | 4.78205100  |
| H | -0.63477500 | 0.17283700  | 4.62990300  |
| H | -1.74656000 | -0.80441000 | 5.60531900  |
| H | -0.19643500 | -1.48937700 | 5.07403900  |
| C | -2.90416300 | -0.45079800 | 3.14944300  |
| H | -3.66246800 | -0.52236800 | 3.93620000  |
| H | -2.58885200 | 0.59151400  | 3.07774700  |
| H | -3.35444800 | -0.73723300 | 2.19800100  |
| C | 5.09318700  | 1.55187600  | 0.53641200  |
| C | 4.51644000  | 1.09900400  | -0.65635700 |
| C | 6.45412800  | 1.30171600  | 0.75906200  |
| C | 5.25196400  | 0.37550000  | -1.60440500 |
| H | 3.46810100  | 1.30140900  | -0.84515400 |
| C | 7.20794400  | 0.60448600  | -0.18624600 |
| H | 6.92399500  | 1.66180200  | 1.67003800  |
| C | 6.61031600  | 0.13696700  | -1.35813000 |
| H | 8.26538500  | 0.42711200  | -0.01060600 |
| H | 7.20108500  | -0.40625200 | -2.09057300 |
| C | -2.85937400 | -3.47031000 | 2.55827000  |
| C | -2.06943700 | -4.07673600 | 1.57448700  |

|    |             |             |             |
|----|-------------|-------------|-------------|
| C  | -4.24990500 | -3.46595200 | 2.38803400  |
| C  | -2.62319600 | -4.62857700 | 0.41306300  |
| H  | -0.99616100 | -4.11057900 | 1.71148400  |
| C  | -4.82302000 | -4.04432100 | 1.25365100  |
| H  | -4.88339200 | -3.01782000 | 3.14868200  |
| C  | -4.01596300 | -4.61003800 | 0.26438900  |
| H  | -5.90341100 | -4.05272900 | 1.13912200  |
| H  | -4.46821400 | -5.04883400 | -0.62080900 |
| O  | -3.78149300 | -0.78142700 | -0.35098400 |
| C  | -3.44104500 | 0.41146700  | -1.05829900 |
| C  | -5.19815100 | -0.81387000 | -0.18684600 |
| N  | -4.68345400 | 0.82882400  | -1.71528100 |
| C  | -2.41867900 | 0.20204300  | -2.21380800 |
| C  | -5.73618700 | 0.05460700  | -1.31839000 |
| H  | -5.50424000 | -0.42158600 | 0.79395100  |
| H  | -5.55386400 | -1.84055300 | -0.28422900 |
| C  | -4.45039000 | 1.24665800  | -3.09810100 |
| C  | -1.63435400 | 1.99211200  | -0.85197100 |
| C  | -3.24659200 | 0.38526800  | -3.51210400 |
| H  | -1.99656500 | -0.79675800 | -2.15130400 |
| O  | -6.86523200 | 0.04709500  | -1.78952700 |
| H  | -5.35609300 | 1.06328300  | -3.67959200 |
| H  | -4.22202200 | 2.31556200  | -3.13581800 |
| H  | -3.60434300 | -0.59274800 | -3.85045500 |
| H  | -2.65852200 | 0.82976500  | -4.31535100 |
| O  | -0.93783300 | 3.02833900  | -0.39757200 |
| Si | -1.46494400 | 4.42725200  | 0.45295400  |
| C  | -1.97337100 | 3.92000600  | 2.21213500  |
| H  | -2.94743600 | 3.42573900  | 2.08434500  |
| C  | -2.97213500 | 5.16269700  | -0.45093100 |
| C  | 0.06595300  | 5.53156000  | 0.33416500  |
| H  | -0.19001600 | 6.47947300  | 0.82870500  |
| C  | 1.28169200  | 4.92402200  | 1.05453900  |
| H  | 1.50535400  | 3.92339200  | 0.67128300  |
| H  | 2.17358000  | 5.54470000  | 0.89756800  |
| H  | 1.12506200  | 4.84200200  | 2.13331400  |
| C  | 0.41594100  | 5.83197000  | -1.13577500 |
| H  | -0.38158700 | 6.37742100  | -1.64846500 |
| H  | 1.32471400  | 6.44462400  | -1.19532900 |
| H  | 0.59879100  | 4.90594200  | -1.69067900 |
| C  | -1.02552500 | 2.91564300  | 2.88589400  |
| H  | -1.46397500 | 2.54859000  | 3.82246400  |
| H  | -0.80852700 | 2.04889700  | 2.25626500  |
| H  | -0.07426800 | 3.38714500  | 3.14269800  |

|   |             |            |             |
|---|-------------|------------|-------------|
| C | -2.19253400 | 5.14736900 | 3.11567900  |
| H | -2.50552600 | 4.83515300 | 4.12014900  |
| H | -1.27118300 | 5.73038200 | 3.22998300  |
| H | -2.96576900 | 5.81788800 | 2.72813200  |
| C | -3.09135300 | 6.68202600 | -0.22197800 |
| H | -2.25843500 | 7.21975700 | -0.68725100 |
| H | -4.01683000 | 7.06560300 | -0.66950800 |
| H | -3.10590700 | 6.95146200 | 0.83860600  |
| H | -3.84931500 | 4.68782800 | 0.01281900  |
| C | -3.01334400 | 4.84533000 | -1.95548200 |
| H | -2.17157300 | 5.30023900 | -2.48729200 |
| H | -2.97984200 | 3.77168200 | -2.15297100 |
| H | -3.93520000 | 5.23580300 | -2.40493600 |
| C | -2.85427100 | 1.49162000 | -0.12728700 |
| H | -3.57776700 | 2.28646500 | 0.07631000  |
| H | -2.55017500 | 1.04262000 | 0.82140700  |
| C | -1.35713400 | 1.25280300 | -1.96720200 |
| C | -0.26273300 | 1.41781600 | -2.92314100 |
| O | -0.15643000 | 0.75485400 | -3.94923200 |
| O | 0.62506500  | 2.38221000 | -2.58858700 |
| C | 1.69319300  | 2.59607500 | -3.52306100 |
| H | 2.42347000  | 3.21673000 | -3.00364100 |
| H | 2.14040600  | 1.64935500 | -3.82651500 |
| H | 1.32356800  | 3.11841600 | -4.41142300 |

**TS13**

|    |             |             |             |
|----|-------------|-------------|-------------|
| Rh | -2.67379900 | 1.51439500  | -0.72440500 |
| O  | -3.68148600 | 0.57404200  | 0.79683500  |
| O  | -2.11649700 | 2.97564500  | 0.59790600  |
| O  | -1.53989900 | 2.32993200  | -2.23539800 |
| O  | -3.16930500 | -0.02037100 | -1.98237100 |
| Rh | -0.67387900 | 0.28338800  | -0.04359800 |
| C  | -2.37555500 | -1.00557900 | -2.06194300 |
| O  | -1.28886100 | -1.13374900 | -1.40545300 |
| C  | -0.30636000 | 2.04181400  | -2.32654100 |
| O  | 0.32417000  | 1.25014300  | -1.55146000 |
| C  | -3.06504100 | -0.24595000 | 1.54032800  |
| O  | -1.82641700 | -0.54623500 | 1.44172700  |
| O  | -0.23927600 | 1.86989100  | 1.19689300  |
| C  | -1.04113400 | 2.86024700  | 1.26197200  |
| C  | -3.84410600 | -0.93209300 | 2.66944000  |
| C  | -2.71697100 | -2.14348800 | -3.03190600 |
| C  | 0.47850600  | 2.69370300  | -3.47323200 |
| C  | -0.70606700 | 4.00757000  | 2.22440200  |

|   |             |             |             |
|---|-------------|-------------|-------------|
| C | -3.62279600 | -2.47253300 | 2.57702800  |
| H | -4.16901100 | -2.92656600 | 3.41077800  |
| H | -2.55888700 | -2.67161200 | 2.73136100  |
| C | -5.33602000 | -0.58761800 | 2.59078600  |
| H | -5.86830000 | -1.09461800 | 3.40245200  |
| H | -5.49485300 | 0.48859900  | 2.69702600  |
| H | -5.77547700 | -0.90239300 | 1.64213800  |
| C | -3.26840800 | -0.42525300 | 4.00718200  |
| H | -3.80642300 | -0.88920500 | 4.84042200  |
| H | -2.20855600 | -0.67010100 | 4.09949600  |
| H | -3.38124700 | 0.66094400  | 4.09249500  |
| C | -2.66296800 | -3.49707400 | -2.26118000 |
| H | -2.89121200 | -4.28808600 | -2.98361600 |
| H | -1.63513100 | -3.64247900 | -1.92106300 |
| C | -1.63327000 | -2.16143600 | -4.12868200 |
| H | -1.85338600 | -2.95394600 | -4.85165900 |
| H | -1.60595000 | -1.20830700 | -4.66787500 |
| H | -0.64593200 | -2.34428200 | -3.70050200 |
| C | -4.09483300 | -1.92469500 | -3.66669000 |
| H | -4.11853100 | -0.99357500 | -4.23901000 |
| H | -4.31590900 | -2.75191000 | -4.34940600 |
| H | -4.88462300 | -1.87927300 | -2.91398100 |
| C | 1.96003000  | 2.30517800  | -3.42859000 |
| H | 2.49010600  | 2.80056200  | -4.24889600 |
| H | 2.42938500  | 2.59956500  | -2.48795600 |
| H | 2.08132100  | 1.22756100  | -3.54467500 |
| C | -0.14310700 | 2.20413000  | -4.79689700 |
| H | -1.20171800 | 2.46924900  | -4.85822900 |
| H | 0.38124900  | 2.66121200  | -5.64255800 |
| H | -0.05230500 | 1.11643200  | -4.88954300 |
| C | 0.31006400  | 4.24126900  | -3.37979100 |
| H | 0.87818400  | 4.67683600  | -4.20866800 |
| H | -0.74474800 | 4.47977000  | -3.54168200 |
| C | -0.69979800 | 5.34655600  | 1.42494800  |
| H | -1.71225700 | 5.52745100  | 1.05373600  |
| H | -0.46127400 | 6.14335300  | 2.13747600  |
| C | -1.82826900 | 4.06393900  | 3.28125200  |
| H | -1.86992700 | 3.13103700  | 3.85387200  |
| H | -1.63494200 | 4.88337100  | 3.98134400  |
| H | -2.80290400 | 4.22708200  | 2.81413700  |
| C | 0.64009100  | 3.78247900  | 2.91589400  |
| H | 0.84285000  | 4.61466000  | 3.59854600  |
| H | 0.63009200  | 2.85444800  | 3.48748800  |
| H | 1.45507700  | 3.72803400  | 2.19212200  |



|    |             |             |             |
|----|-------------|-------------|-------------|
| C  | -4.07052600 | -3.08751900 | 1.27059900  |
| C  | -3.21312300 | -3.07987400 | 0.16351000  |
| C  | -5.34781400 | -3.64363100 | 1.12052400  |
| C  | -3.60473900 | -3.58453900 | -1.08290800 |
| H  | -2.22138000 | -2.66176600 | 0.26965400  |
| C  | -5.74987500 | -4.16766100 | -0.10961600 |
| H  | -6.02483700 | -3.67159400 | 1.97001800  |
| C  | -4.88719000 | -4.13476100 | -1.20694100 |
| H  | -6.73897600 | -4.60535500 | -0.21298900 |
| H  | -5.20624900 | -4.54370300 | -2.16174200 |
| C  | 0.27525300  | 5.37048800  | 0.27128600  |
| C  | -0.12018700 | 4.89611100  | -0.98526500 |
| C  | 1.59256200  | 5.82197100  | 0.43046400  |
| C  | 0.76701300  | 4.83304000  | -2.06689500 |
| H  | -1.14032100 | 4.55643500  | -1.12118400 |
| C  | 2.48509700  | 5.78794200  | -0.64265800 |
| H  | 1.91427200  | 6.21082200  | 1.39261700  |
| C  | 2.07854900  | 5.29107500  | -1.88258400 |
| H  | 3.49969700  | 6.15490300  | -0.51376200 |
| H  | 2.77745500  | 5.26849700  | -2.71421700 |
| C  | 2.67942200  | 0.84953700  | 0.43203600  |
| H  | 1.91896200  | 1.61604200  | 0.46517800  |
| H  | 3.72200000  | 1.14246800  | 0.40004500  |
| C  | 2.31733300  | -0.46980200 | 0.32889000  |
| C  | 0.95561100  | -0.84478900 | 0.40648000  |
| C  | 0.68807700  | -2.24472400 | 0.81190100  |
| O  | 0.62238800  | -2.54071400 | 1.99533000  |
| O  | 0.47401500  | -3.11275400 | -0.18194400 |
| C  | 0.13553300  | -4.45954900 | 0.22338600  |
| H  | -0.01499400 | -5.01107400 | -0.70307800 |
| H  | 0.95019100  | -4.90199600 | 0.79911100  |
| H  | -0.78022200 | -4.45808700 | 0.81607900  |
| O  | 3.28276800  | -1.45231700 | 0.27787200  |
| Si | 4.16209400  | -1.98124500 | -1.09825000 |
| C  | 5.95124200  | -1.33879800 | -0.95387200 |
| H  | 5.90789800  | -0.28440700 | -1.26798400 |
| C  | 4.17080300  | -3.88138200 | -0.97773200 |
| H  | 5.16730300  | -4.18395800 | -1.32660600 |
| C  | 3.33977000  | -1.15436300 | -2.60013600 |
| H  | 3.26039100  | -0.11031200 | -2.26092300 |
| C  | 1.91698200  | -1.62873700 | -2.93586300 |
| H  | 1.25518900  | -1.66662800 | -2.06986000 |
| H  | 1.45797200  | -0.94947500 | -3.66427400 |
| H  | 1.93058100  | -2.62564600 | -3.38542400 |

|   |             |             |             |
|---|-------------|-------------|-------------|
| C | 4.20592900  | -1.14379700 | -3.87130000 |
| H | 4.41219700  | -2.15811600 | -4.23288100 |
| H | 3.68359700  | -0.61466400 | -4.67899300 |
| H | 5.16377100  | -0.63924100 | -3.71822200 |
| C | 6.50771800  | -1.38471600 | 0.47632600  |
| H | 7.52186200  | -0.96614700 | 0.51611100  |
| H | 5.88770400  | -0.81927700 | 1.17126800  |
| H | 6.56836200  | -2.41450500 | 0.84674800  |
| C | 6.92019900  | -2.07770000 | -1.89840600 |
| H | 6.55900600  | -2.14599800 | -2.92792600 |
| H | 7.89250800  | -1.56961300 | -1.92457100 |
| H | 7.10157700  | -3.09917800 | -1.54600100 |
| C | 4.04033100  | -4.33742200 | 0.48846400  |
| H | 4.07560400  | -5.43258200 | 0.55425600  |
| H | 4.84714900  | -3.94410300 | 1.11565200  |
| H | 3.09808200  | -4.00308300 | 0.93066200  |
| C | 3.14435200  | -4.59361900 | -1.87287100 |
| H | 3.32654200  | -4.39500400 | -2.93377900 |
| H | 3.19703900  | -5.68079800 | -1.72738500 |
| H | 2.12372200  | -4.27802000 | -1.64785700 |
| C | 2.39578600  | 0.52896500  | 3.60625500  |
| C | 4.31165600  | -0.81407100 | 3.45287200  |
| C | 3.30913500  | 1.37886800  | 3.09227500  |
| H | 4.93443500  | -1.26107200 | 4.22881800  |
| H | 4.35144000  | -1.42972300 | 2.55074800  |
| H | 3.15915700  | 2.42264100  | 2.86965100  |
| C | 4.66002400  | 0.67892200  | 3.15570400  |
| H | 5.23132100  | 0.77337700  | 2.22846600  |
| H | 5.28359100  | 1.09655600  | 3.95692500  |
| O | 1.09098400  | 0.57961300  | 3.91672900  |
| C | 0.71050700  | -0.72005500 | 4.45497200  |
| H | 0.33665000  | -0.58583400 | 5.47347300  |
| H | -0.05042700 | -1.15847000 | 3.80977000  |
| C | 1.98685200  | -1.56618000 | 4.42150300  |
| O | 2.13479000  | -2.71480100 | 4.80100400  |
| N | 2.91785900  | -0.72255800 | 3.89057300  |

**TS14**

|    |            |             |             |
|----|------------|-------------|-------------|
| Rh | 1.76527500 | 0.07729600  | -2.57748900 |
| O  | 1.08706400 | 2.01356500  | -2.58782300 |
| O  | 3.35990000 | 0.69171600  | -1.42909500 |
| O  | 2.39095300 | -1.87111500 | -2.41880400 |
| O  | 0.02857000 | -0.51257900 | -3.53774500 |
| Rh | 0.51583900 | -0.26025500 | -0.45729500 |

|   |             |             |             |
|---|-------------|-------------|-------------|
| C | -1.01434700 | -0.60390500 | -2.84373300 |
| O | -1.15509700 | -0.49336100 | -1.59330900 |
| C | 1.88359800  | -2.55831600 | -1.49813400 |
| O | 1.00250000  | -2.23949900 | -0.65295100 |
| C | 0.47364500  | 2.41038500  | -1.56950800 |
| O | 0.17438500  | 1.77881400  | -0.51638400 |
| O | 2.30282600  | 0.05752100  | 0.48592400  |
| C | 3.23468100  | 0.57976300  | -0.18089800 |
| C | -3.49738000 | -1.35051400 | -2.77825000 |
| C | 4.27461800  | 2.80171300  | 0.46522400  |
| C | -2.32085800 | -0.82012400 | -3.63356200 |
| F | -2.68518500 | 0.38051400  | -4.16296200 |
| F | -2.09729300 | -1.68628700 | -4.65079800 |
| F | -3.08165500 | -2.42826000 | -2.07174600 |
| F | -3.89328200 | -0.37302700 | -1.92887100 |
| C | -4.74279100 | -1.78960800 | -3.58700200 |
| F | -5.74144600 | -2.06663800 | -2.73467200 |
| F | -5.13810900 | -0.81021000 | -4.40997500 |
| F | -4.47792200 | -2.88625500 | -4.30357000 |
| C | 2.45750400  | -3.97624000 | -1.31331700 |
| F | 1.48079300  | -4.82416900 | -0.89757200 |
| F | 2.96414500  | -4.43938300 | -2.47639700 |
| C | 3.59449100  | -3.96373400 | -0.25631600 |
| C | 4.04836800  | -5.36081200 | 0.23022300  |
| F | 3.19027500  | -3.26598100 | 0.83435600  |
| F | 4.65885500  | -3.32880200 | -0.79962000 |
| F | 3.09767700  | -5.91465900 | 0.99344900  |
| F | 5.16418100  | -5.23199700 | 0.95694400  |
| F | 4.29688500  | -6.16358200 | -0.81125900 |
| C | 4.34527800  | 1.25270100  | 0.64507200  |
| C | -0.01440300 | 3.87330700  | -1.58721200 |
| F | 4.20594700  | 0.95054100  | 1.95814000  |
| F | 5.56380100  | 0.82796100  | 0.23444700  |
| F | 5.00508000  | 3.14755600  | -0.61483300 |
| F | 2.98480100  | 3.17330500  | 0.24616200  |
| C | 4.78847100  | 3.60879500  | 1.68024200  |
| F | 3.93273700  | 3.51025300  | 2.70586800  |
| F | 5.98749800  | 3.14852900  | 2.06147700  |
| F | 4.90525900  | 4.89704600  | 1.34067400  |
| F | 0.39627700  | 4.49198500  | -2.71582200 |
| F | 0.50559800  | 4.53691600  | -0.52075300 |
| C | -1.56412300 | 3.94681000  | -1.50989600 |
| F | -2.08234700 | 2.91695500  | -2.22896500 |
| F | -1.94829700 | 3.81187800  | -0.21907400 |

|    |             |             |             |
|----|-------------|-------------|-------------|
| C  | -2.17343800 | 5.26306900  | -2.04917100 |
| F  | -3.46439000 | 5.32728800  | -1.70584000 |
| F  | -2.07565500 | 5.31417400  | -3.38032300 |
| F  | -1.52964300 | 6.31147700  | -1.51685000 |
| C  | -1.94627500 | 1.24598700  | 1.57038300  |
| H  | -1.38661400 | 1.75764700  | 0.80656000  |
| H  | -2.75806800 | 1.77180800  | 2.05673700  |
| C  | -1.64251900 | -0.04006200 | 1.88805200  |
| C  | -0.55745700 | -0.73605700 | 1.25427800  |
| C  | -0.54037500 | -2.20513600 | 1.50940000  |
| O  | -1.38548300 | -2.88714700 | 0.95376000  |
| O  | 0.44996900  | -2.68688100 | 2.25498100  |
| C  | 0.52051300  | -4.12839600 | 2.35574600  |
| H  | 1.39270100  | -4.32837900 | 2.97596900  |
| H  | -0.38181900 | -4.51843700 | 2.82992300  |
| H  | 0.64346100  | -4.56714700 | 1.36679000  |
| O  | -2.31805900 | -0.72134000 | 2.86232300  |
| Si | -4.01336400 | -1.01230800 | 2.91744800  |
| C  | -4.57665800 | -1.40461600 | 1.13239400  |
| H  | -3.76885400 | -0.99618600 | 0.51172900  |
| C  | -4.12743900 | -2.45903100 | 4.14296100  |
| H  | -5.12667700 | -2.89540400 | 3.99335600  |
| C  | -4.87270600 | 0.57164700  | 3.53885300  |
| H  | -4.92109900 | 1.22497000  | 2.65535400  |
| C  | -4.10307700 | 1.34392200  | 4.62367400  |
| H  | -3.09790700 | 1.61129500  | 4.29045700  |
| H  | -4.62525400 | 2.27564200  | 4.87635200  |
| H  | -4.00502900 | 0.76610100  | 5.54699400  |
| C  | -6.32361000 | 0.30600900  | 3.98536800  |
| H  | -6.35579200 | -0.27865000 | 4.91063200  |
| H  | -6.84493200 | 1.25118100  | 4.18261400  |
| H  | -6.90478800 | -0.23628000 | 3.23445300  |
| C  | -4.67818600 | -2.90571700 | 0.80727100  |
| H  | -5.00682900 | -3.04184500 | -0.23010900 |
| H  | -3.71669900 | -3.40921300 | 0.91191000  |
| H  | -5.40958500 | -3.41035100 | 1.44981100  |
| C  | -5.87203800 | -0.69702500 | 0.69322100  |
| H  | -5.84820700 | 0.38327600  | 0.86456900  |
| H  | -6.03345800 | -0.85477800 | -0.37905600 |
| H  | -6.74850200 | -1.09925200 | 1.21335500  |
| C  | -3.07927700 | -3.55227300 | 3.86190300  |
| H  | -3.21931600 | -4.39763900 | 4.54779700  |
| H  | -3.12600800 | -3.93513700 | 2.84177400  |
| H  | -2.06832500 | -3.16228200 | 4.01799700  |

|   |             |             |            |
|---|-------------|-------------|------------|
| C | -4.01768200 | -2.02583200 | 5.61669800 |
| H | -4.81409900 | -1.34100800 | 5.91708000 |
| H | -4.07222000 | -2.90198100 | 6.27570600 |
| H | -3.05952300 | -1.53203800 | 5.81641700 |
| C | 0.88985000  | 1.17205000  | 3.08755900 |
| C | -0.33694800 | 0.69614100  | 5.03402000 |
| C | 1.20856800  | -0.12428900 | 3.32431600 |
| H | 0.03461400  | 1.10002800  | 5.97903000 |
| H | -1.40620400 | 0.51342300  | 5.11289200 |
| H | 1.91898500  | -0.71260600 | 2.77169800 |
| C | 0.45026500  | -0.56803200 | 4.56478200 |
| H | -0.23511700 | -1.38625200 | 4.33423600 |
| H | 1.12638600  | -0.92010500 | 5.35096100 |
| O | 1.23398000  | 2.09475900  | 2.18416300 |
| C | 0.56529900  | 3.33670000  | 2.53736400 |
| H | 1.32041800  | 4.07887700  | 2.81061600 |
| H | -0.01008200 | 3.69142100  | 1.68400700 |
| C | -0.32087700 | 2.98872400  | 3.73852900 |
| O | -1.06571200 | 3.72144100  | 4.36241300 |
| N | -0.05604600 | 1.66077600  | 3.96214700 |

**TS15**

|    |             |             |             |
|----|-------------|-------------|-------------|
| Rh | 1.24768600  | 0.50967100  | -2.67392700 |
| O  | 2.97610800  | 1.09551100  | -1.70800200 |
| O  | 1.93709600  | -1.43648800 | -2.67045900 |
| O  | -0.57737000 | -0.10024100 | -3.41861600 |
| O  | 0.54042600  | 2.42790600  | -2.48541100 |
| Rh | 0.30828500  | 0.06475400  | -0.41436000 |
| C  | 0.06458600  | 2.75501600  | -1.37094600 |
| O  | -0.08218000 | 2.06653000  | -0.32194500 |
| C  | -1.48596300 | -0.36336600 | -2.59454800 |
| O  | -1.48422400 | -0.28533200 | -1.33176600 |
| C  | 3.01811100  | 0.97137800  | -0.46240000 |
| O  | 2.17364400  | 0.45529000  | 0.32951300  |
| O  | 0.82109900  | -1.89959000 | -0.73894100 |
| C  | 1.61161700  | -2.14829100 | -1.69010200 |
| C  | -2.01093000 | 4.19016100  | -1.05909500 |
| C  | 3.83144000  | -3.20912900 | -1.09051200 |
| C  | -0.46691900 | 4.19449000  | -1.22707200 |
| F  | 0.08341300  | 4.77622700  | -0.13053200 |
| F  | -0.14591100 | 4.93071500  | -2.31409700 |
| F  | -2.52846000 | 3.22477400  | -1.86592900 |
| F  | -2.31848400 | 3.90034800  | 0.22342600  |
| C  | -2.70528800 | 5.52419200  | -1.41885700 |

|   |             |             |             |
|---|-------------|-------------|-------------|
| F | -3.98328000 | 5.47809500  | -1.02079000 |
| F | -2.09418200 | 6.53991300  | -0.79165900 |
| F | -2.67287900 | 5.73552000  | -2.73725800 |
| C | -2.80398800 | -0.93046100 | -3.16057700 |
| F | -3.85829600 | -0.19974300 | -2.71499600 |
| F | -2.79843700 | -0.90142700 | -4.51101300 |
| C | -2.99732300 | -2.39986500 | -2.69651300 |
| C | -3.99651700 | -3.22409300 | -3.54093200 |
| F | -3.43652700 | -2.41507200 | -1.41675800 |
| F | -1.79198300 | -3.03218400 | -2.74594800 |
| F | -5.14627700 | -2.54969200 | -3.67308000 |
| F | -4.24478600 | -4.38449700 | -2.91708500 |
| F | -3.49335600 | -3.48617800 | -4.74922800 |
| C | 2.37006200  | -3.48279300 | -1.56740100 |
| C | 4.21733100  | 1.60368900  | 0.26596700  |
| F | 1.75793200  | -4.29512300 | -0.65960100 |
| F | 2.41726800  | -4.13185600 | -2.74862800 |
| F | 4.60867200  | -2.99075800 | -2.16568500 |
| F | 3.84993900  | -2.08825200 | -0.31160300 |
| C | 4.46362000  | -4.34435900 | -0.25239500 |
| F | 3.89353800  | -4.40188200 | 0.96379200  |
| F | 4.30424500  | -5.52163600 | -0.86671700 |
| F | 5.76947400  | -4.10639700 | -0.09424700 |
| F | 5.21914100  | 1.87903200  | -0.59478800 |
| F | 4.68487700  | 0.75048000  | 1.21896100  |
| C | 3.76581600  | 2.91676400  | 0.96326500  |
| F | 2.95652500  | 3.59902400  | 0.11011100  |
| F | 3.05967500  | 2.60357300  | 2.07198300  |
| C | 4.91753200  | 3.86104600  | 1.37864400  |
| F | 4.43098200  | 4.83473900  | 2.15719700  |
| F | 5.48603000  | 4.41121600  | 0.30252600  |
| F | 5.84267700  | 3.17662600  | 2.06681300  |
| C | -1.57650700 | -2.46054000 | 1.01811700  |
| H | -1.35214700 | -2.34217500 | -0.03407200 |
| H | -2.53055600 | -2.96395000 | 1.17986700  |
| C | -1.39370100 | -1.22301000 | 1.81471300  |
| C | -0.56761200 | -0.22694000 | 1.46345000  |
| C | -0.24085900 | 0.84673400  | 2.41712600  |
| O | 0.69815600  | 0.75516700  | 3.20142300  |
| O | -0.97955600 | 1.96081800  | 2.30233400  |
| C | -0.49484600 | 3.12346500  | 2.99845000  |
| H | -1.07425100 | 3.95551000  | 2.60197900  |
| H | -0.65326100 | 3.01993300  | 4.07460800  |
| H | 0.56817500  | 3.26229900  | 2.79658500  |

|    |             |             |             |
|----|-------------|-------------|-------------|
| O  | -2.17698800 | -1.16218400 | 2.96680000  |
| Si | -3.80788800 | -0.61725200 | 2.92347800  |
| C  | -4.81762200 | -2.10072400 | 3.56936800  |
| H  | -4.75455800 | -2.87190100 | 2.78544300  |
| C  | -3.94361100 | 0.77900700  | 4.21870000  |
| H  | -4.84597100 | 0.52943200  | 4.79616500  |
| C  | -4.19151600 | -0.27430300 | 1.08409900  |
| H  | -3.51702200 | -0.98048800 | 0.58355800  |
| C  | -3.80130900 | 1.11704500  | 0.55689000  |
| H  | -2.79333700 | 1.40890600  | 0.84809000  |
| H  | -3.84076100 | 1.11732700  | -0.53593000 |
| H  | -4.49121600 | 1.88704600  | 0.91353700  |
| C  | -5.61019800 | -0.63740100 | 0.61344300  |
| H  | -6.36849600 | 0.02707300  | 1.04322200  |
| H  | -5.66755100 | -0.53423200 | -0.47663200 |
| H  | -5.88618900 | -1.66773600 | 0.85791900  |
| C  | -4.22469300 | -2.68805300 | 4.86251100  |
| H  | -4.76696700 | -3.59059700 | 5.17094300  |
| H  | -3.16969800 | -2.95048000 | 4.75304800  |
| H  | -4.29830200 | -1.97134000 | 5.68811600  |
| C  | -6.30518100 | -1.77213400 | 3.79708300  |
| H  | -6.79631900 | -1.38205100 | 2.90326400  |
| H  | -6.85638300 | -2.66614300 | 4.11400200  |
| H  | -6.42432200 | -1.02616100 | 4.59094400  |
| C  | -2.75382500 | 0.73679300  | 5.19870700  |
| H  | -2.88371600 | 1.48794800  | 5.98769600  |
| H  | -2.65212100 | -0.23852700 | 5.68530100  |
| H  | -1.80927700 | 0.94167000  | 4.69003900  |
| C  | -4.14307700 | 2.19912900  | 3.66504200  |
| H  | -5.05880700 | 2.27932700  | 3.07181600  |
| H  | -4.21931100 | 2.92137400  | 4.48787200  |
| H  | -3.30886900 | 2.50098600  | 3.02908400  |
| C  | 0.87955400  | -2.85958500 | 2.39319300  |
| C  | -0.29217700 | -3.06493400 | 4.40581900  |
| C  | -0.28171200 | -3.66077600 | 2.00096900  |
| H  | 0.04158000  | -3.50233900 | 5.34726900  |
| H  | -0.99816600 | -2.25352200 | 4.58477300  |
| H  | -0.05957500 | -4.44920700 | 1.28533100  |
| C  | -0.83145800 | -4.10416600 | 3.38103400  |
| H  | -1.92055100 | -4.13813900 | 3.38887800  |
| H  | -0.45664600 | -5.10184100 | 3.62964300  |
| O  | 1.88777800  | -2.39079900 | 1.72979000  |
| C  | 2.67320200  | -1.54296900 | 2.64096300  |
| H  | 3.69437300  | -1.92412600 | 2.64033500  |

|   |            |             |            |
|---|------------|-------------|------------|
| H | 2.61579300 | -0.52242500 | 2.26037600 |
| C | 1.97291000 | -1.68521800 | 3.98815900 |
| O | 2.27194100 | -1.28080500 | 5.07442500 |
| N | 0.86017300 | -2.51861700 | 3.67361400 |

**2s**

|    |             |             |             |
|----|-------------|-------------|-------------|
| Cu | 0.36952500  | 0.94459800  | 0.18229300  |
| N  | -0.54314400 | 1.50665100  | -1.47840300 |
| N  | 0.55093700  | -1.18876200 | -0.18199800 |
| N  | -1.05986900 | 0.96317300  | 1.56931400  |
| C  | -1.35443600 | 1.55285100  | -2.30324900 |
| C  | 0.06950500  | -2.23029600 | -0.35190000 |
| C  | -2.04777700 | 0.78086300  | 2.14508200  |
| C  | -0.52736600 | -3.53742700 | -0.56129000 |
| H  | -0.50618700 | -4.10038500 | 0.37612900  |
| H  | -1.56697600 | -3.41728300 | -0.87755300 |
| H  | 0.03649200  | -4.08272900 | -1.32330300 |
| C  | -2.41066900 | 1.56145500  | -3.29775000 |
| H  | -3.13584500 | 0.79252400  | -3.01750700 |
| H  | -2.89954200 | 2.53940200  | -3.31701900 |
| H  | -2.00061900 | 1.34125900  | -4.28719800 |
| C  | -3.30343900 | 0.54067100  | 2.83171000  |
| H  | -3.14728400 | -0.17375400 | 3.64487800  |
| H  | -3.68757300 | 1.47799700  | 3.24354400  |
| H  | -4.01720200 | 0.12118800  | 2.11715300  |
| B  | -3.46226500 | -1.53678500 | -0.16295400 |
| F  | -2.90533000 | -0.57824800 | -1.03376500 |
| F  | -2.57926700 | -1.77373300 | 0.91069900  |
| F  | -4.68516400 | -1.06032100 | 0.34271400  |
| F  | -3.66345500 | -2.74005600 | -0.86501700 |
| N  | -0.17839600 | 4.12153000  | 0.64323500  |
| N  | -1.26692300 | 4.11161800  | 0.45524300  |
| C  | 3.73659300  | -2.03304400 | 1.15887600  |
| C  | 4.60618900  | -2.28265300 | -0.11002600 |
| C  | 4.16697400  | -1.21561800 | -1.15170300 |
| H  | 2.84912500  | -2.67495800 | 1.19525100  |
| H  | 4.28053400  | -2.15218100 | 2.09824500  |
| H  | 5.65944100  | -2.13561900 | 0.13858800  |
| H  | 4.48273400  | -3.29445000 | -0.49635300 |
| H  | 4.99883100  | -0.78119700 | -1.70672300 |
| H  | 3.41940200  | -1.58933200 | -1.85699600 |
| N  | 3.53863400  | -0.20562200 | -0.29639400 |
| C  | 3.03731400  | 1.14221200  | -0.46139700 |
| O  | 3.21511400  | 1.81246700  | -1.47203000 |



|   |            |             |            |
|---|------------|-------------|------------|
| C | 2.31435800 | 1.35285000  | 0.77596200 |
| H | 2.37253600 | 2.29048200  | 1.31713100 |
| C | 3.29984300 | -0.63332500 | 0.92553900 |
| O | 2.67800800 | 0.23121900  | 1.66105800 |

### 3s

|    |             |             |             |
|----|-------------|-------------|-------------|
| Cu | 1.92603000  | -0.30972800 | 0.37193500  |
| N  | 2.00958600  | -1.88510600 | -0.84372900 |
| N  | 3.26854600  | 1.03001500  | -0.61834400 |
| N  | 2.96118000  | -0.86128900 | 1.97009700  |
| C  | 2.47399900  | -2.73829300 | -1.47374400 |
| C  | 4.31451200  | 1.32619200  | -1.02203400 |
| C  | 3.83770400  | -1.19438600 | 2.65019100  |
| C  | 5.62649200  | 1.68973300  | -1.52678000 |
| H  | 6.08537900  | 2.42154400  | -0.85590500 |
| H  | 6.25719500  | 0.79736700  | -1.56330500 |
| H  | 5.53176300  | 2.12450600  | -2.52573200 |
| C  | 3.12216700  | -3.78871300 | -2.23639900 |
| H  | 4.19694300  | -3.72396100 | -2.04502300 |
| H  | 2.75007900  | -4.76713100 | -1.92015800 |
| H  | 2.92771500  | -3.65481500 | -3.30408100 |
| C  | 4.96013600  | -1.62055400 | 3.46517900  |
| H  | 5.38649200  | -0.75640900 | 3.98262100  |
| H  | 4.62720600  | -2.35515700 | 4.20355800  |
| H  | 5.71986800  | -2.05955200 | 2.81208300  |
| B  | 6.29861200  | -1.46978700 | 0.06512200  |
| F  | 5.15644700  | -2.05348000 | -0.51829200 |
| F  | 5.92590200  | -0.31809000 | 0.78821100  |
| F  | 6.90163600  | -2.38992300 | 0.94215900  |
| F  | 7.20412100  | -1.10138100 | -0.94788600 |
| C  | 1.37273500  | 4.28307700  | -0.45745000 |
| C  | 0.72796900  | 4.53637100  | -1.85312400 |
| C  | 0.36087900  | 3.13435600  | -2.41444700 |
| H  | 2.46462900  | 4.19996400  | -0.51102300 |
| H  | 1.12508300  | 5.03605100  | 0.29199300  |
| H  | -0.18430600 | 5.12373600  | -1.72693700 |
| H  | 1.39747300  | 5.07701200  | -2.52205300 |
| H  | -0.60213200 | 3.10884200  | -2.92528200 |
| H  | 1.13063200  | 2.72057700  | -3.07172000 |
| N  | 0.30230500  | 2.33416500  | -1.18918000 |
| C  | -0.18976400 | 1.02630100  | -0.82060900 |
| O  | -0.79137400 | 0.29528400  | -1.59958000 |
| C  | 0.25950000  | 0.90160100  | 0.55163300  |
| H  | -0.39009000 | 0.51845200  | 1.32930700  |

|    |             |             |             |
|----|-------------|-------------|-------------|
| C  | 0.81288400  | 2.94467500  | -0.14008700 |
| O  | 0.76192600  | 2.23390200  | 0.93931800  |
| C  | -3.03762800 | 0.13648100  | 2.37719800  |
| H  | -2.67775500 | 0.82550600  | 3.12660400  |
| H  | -3.26796700 | -0.88214100 | 2.66532400  |
| C  | -3.21146600 | 0.54127800  | 1.10721500  |
| C  | -2.92032900 | 1.90220600  | 0.62181600  |
| N  | -3.12322300 | 2.12367600  | -0.66039800 |
| N  | -3.30144900 | 2.31508100  | -1.76386000 |
| C  | -2.36664800 | 3.00955800  | 1.39937600  |
| O  | -2.17231000 | 2.98664700  | 2.60160700  |
| O  | -2.08751500 | 4.07811700  | 0.61397600  |
| C  | -1.63473500 | 5.25317100  | 1.31506400  |
| H  | -1.45328800 | 6.00063100  | 0.54357600  |
| H  | -2.40493300 | 5.60501000  | 2.00581100  |
| H  | -0.71874200 | 5.04299900  | 1.87063800  |
| O  | -3.66874700 | -0.22435300 | 0.09076600  |
| Si | -4.19220200 | -1.84784500 | 0.03323400  |
| C  | -5.68395200 | -2.04736400 | 1.19876900  |
| H  | -5.25309400 | -2.30619200 | 2.17697800  |
| C  | -4.63490300 | -2.00130900 | -1.80071800 |
| H  | -5.01253500 | -3.02332500 | -1.94764400 |
| C  | -2.80278200 | -3.03324900 | 0.57222900  |
| H  | -2.94712400 | -3.17996500 | 1.65265100  |
| C  | -1.38383100 | -2.47480900 | 0.36379300  |
| H  | -1.20026900 | -1.61096700 | 1.00624400  |
| H  | -0.63233000 | -3.23657500 | 0.61143100  |
| H  | -1.20771400 | -2.14936900 | -0.66385700 |
| C  | -2.95849300 | -4.41245700 | -0.09808800 |
| H  | -2.79639400 | -4.35309100 | -1.17946700 |
| H  | -2.22061200 | -5.11892500 | 0.30294100  |
| H  | -3.94985300 | -4.84960300 | 0.06377600  |
| C  | -6.50427200 | -0.75958000 | 1.38583000  |
| H  | -7.32593500 | -0.92835300 | 2.09424400  |
| H  | -5.89205000 | 0.05783600  | 1.77769100  |
| H  | -6.95208400 | -0.41987500 | 0.44634400  |
| C  | -6.58712300 | -3.21881100 | 0.76953100  |
| H  | -6.03710500 | -4.16285600 | 0.69234600  |
| H  | -7.39604100 | -3.37075200 | 1.49552900  |
| H  | -7.05500900 | -3.02834800 | -0.20282300 |
| C  | -5.74823800 | -1.01782200 | -2.20274800 |
| H  | -5.97924400 | -1.11040000 | -3.27192900 |
| H  | -6.67576900 | -1.19258200 | -1.64942700 |
| H  | -5.44178500 | 0.01885000  | -2.02269000 |

|   |             |             |             |
|---|-------------|-------------|-------------|
| C | -3.40101700 | -1.80508100 | -2.70084500 |
| H | -2.63461800 | -2.56519200 | -2.52223700 |
| H | -3.68416700 | -1.86470300 | -3.76011200 |
| H | -2.93479700 | -0.82988700 | -2.53031100 |

**TS2's**

|    |             |             |             |
|----|-------------|-------------|-------------|
| Cu | 2.30813800  | -0.45886400 | 0.39423800  |
| N  | 3.28417700  | -1.95965400 | -0.50205700 |
| N  | 3.08299100  | 1.16212300  | -0.65737900 |
| N  | 3.40319900  | -0.30092200 | 2.09480500  |
| C  | 4.14293600  | -2.61431700 | -0.91929400 |
| C  | 3.96880300  | 1.72203100  | -1.15328800 |
| C  | 4.37520000  | -0.24811800 | 2.72314100  |
| C  | 5.08782900  | 2.39636900  | -1.78399700 |
| H  | 5.61531600  | 3.00189600  | -1.04316900 |
| H  | 5.76775100  | 1.63139900  | -2.16580300 |
| H  | 4.73431600  | 3.03332800  | -2.59918000 |
| C  | 5.24153300  | -3.42099900 | -1.41642300 |
| H  | 5.53166600  | -3.07230400 | -2.41057200 |
| H  | 6.08459400  | -3.29683900 | -0.73334300 |
| H  | 4.94468000  | -4.47187400 | -1.46776700 |
| C  | 5.61199100  | -0.20010900 | 3.47995200  |
| H  | 5.44717800  | -0.56689800 | 4.49656500  |
| H  | 6.34419700  | -0.82500500 | 2.96369000  |
| H  | 5.98006800  | 0.82825500  | 3.51607500  |
| B  | 6.72343600  | -0.33216500 | -0.03463700 |
| F  | 6.48495100  | -1.48823500 | 0.74651700  |
| F  | 6.15265500  | 0.78574400  | 0.60760000  |
| F  | 8.09933600  | -0.14141600 | -0.18931400 |
| F  | 6.11824100  | -0.50226800 | -1.30048100 |
| C  | 0.04466400  | 2.90785600  | -0.73873400 |
| C  | 0.00672600  | 2.78492300  | -2.27687700 |
| C  | 0.08188100  | 1.27215000  | -2.55017100 |
| H  | 1.07291000  | 2.90860600  | -0.36942100 |
| H  | -0.44821400 | 3.80684000  | -0.36975400 |
| H  | -0.92555400 | 3.20025700  | -2.66936100 |
| H  | 0.83304200  | 3.31939200  | -2.74951300 |
| H  | -0.47102400 | 0.96794900  | -3.43934800 |
| H  | 1.11812500  | 0.93035400  | -2.63988700 |
| N  | -0.50408200 | 0.68474000  | -1.33025100 |
| C  | -0.14199600 | -0.60380300 | -0.82063800 |
| O  | -0.11653800 | -1.61889800 | -1.51863700 |
| C  | 0.24221700  | -0.36596500 | 0.55133200  |
| H  | -0.04389500 | -1.04121800 | 1.35068000  |

|    |             |             |             |
|----|-------------|-------------|-------------|
| C  | -0.57126300 | 1.59073400  | -0.25877300 |
| O  | -0.05012900 | 1.00564000  | 0.86476200  |
| C  | -2.89685300 | 0.49687300  | 2.27183700  |
| H  | -2.60095000 | 1.32509100  | 2.89834700  |
| H  | -3.21982100 | -0.41889400 | 2.75178700  |
| C  | -2.82104500 | 0.57517500  | 0.93917800  |
| C  | -2.28438500 | 1.80636900  | 0.22041300  |
| N  | -2.99379600 | 1.89727100  | -1.02369800 |
| N  | -2.96129000 | 1.57627800  | -2.11221600 |
| C  | -2.38325100 | 3.10553300  | 0.99833200  |
| O  | -1.77363300 | 3.30140300  | 2.02551000  |
| O  | -3.17417400 | 3.98725700  | 0.38413500  |
| C  | -3.28660200 | 5.28330500  | 1.02399000  |
| H  | -3.95521600 | 5.85867400  | 0.38582600  |
| H  | -3.70944500 | 5.16999900  | 2.02387300  |
| H  | -2.30566800 | 5.75854500  | 1.08486100  |
| O  | -3.15131300 | -0.39303700 | 0.05940500  |
| Si | -4.41085600 | -1.55834500 | 0.20849100  |
| C  | -5.92970100 | -0.64447300 | 0.89395100  |
| H  | -5.74158000 | -0.53804700 | 1.97165800  |
| C  | -4.62016100 | -2.21764600 | -1.55024200 |
| H  | -5.33690900 | -3.04689300 | -1.45447500 |
| C  | -3.84833000 | -2.91799000 | 1.41411400  |
| H  | -4.19838100 | -2.59589400 | 2.40633100  |
| C  | -2.31708300 | -3.06153300 | 1.48486400  |
| H  | -1.84220900 | -2.14038200 | 1.83035500  |
| H  | -2.03931600 | -3.86181800 | 2.18280500  |
| H  | -1.88120100 | -3.30736000 | 0.51169100  |
| C  | -4.51028700 | -4.27534100 | 1.11024700  |
| H  | -4.17729800 | -4.67402200 | 0.14619100  |
| H  | -4.24203200 | -5.01273300 | 1.87713900  |
| H  | -5.60338900 | -4.21496300 | 1.08350400  |
| C  | -6.13905900 | 0.77011300  | 0.32557900  |
| H  | -7.01036900 | 1.24279100  | 0.79680300  |
| H  | -5.28031800 | 1.42235200  | 0.51114600  |
| H  | -6.32125900 | 0.75912700  | -0.75300500 |
| C  | -7.20123600 | -1.49881100 | 0.73035900  |
| H  | -7.10650000 | -2.47823500 | 1.21100300  |
| H  | -8.06559100 | -0.99594800 | 1.18195400  |
| H  | -7.43876000 | -1.66861600 | -0.32575300 |
| C  | -5.22244300 | -1.19647400 | -2.52905300 |
| H  | -5.31276600 | -1.63489100 | -3.53111300 |
| H  | -6.21997000 | -0.86978300 | -2.22208700 |
| H  | -4.59187100 | -0.30613600 | -2.62252400 |

|   |             |             |             |
|---|-------------|-------------|-------------|
| C | -3.30347600 | -2.79149500 | -2.10541000 |
| H | -2.92147200 | -3.61293000 | -1.49177500 |
| H | -3.45636700 | -3.18324500 | -3.11951700 |
| H | -2.51611200 | -2.03356600 | -2.15457600 |

### 3\_Rh

|    |             |             |             |
|----|-------------|-------------|-------------|
| Rh | -0.94860100 | 0.44303800  | 0.02435400  |
| O  | 0.01549400  | 1.90753000  | 1.11697900  |
| O  | -1.91608700 | -0.12008100 | 1.73962300  |
| O  | -2.02662300 | -0.89684400 | -1.10829600 |
| O  | -0.09206700 | 1.14853700  | -1.70292400 |
| Rh | -2.76772600 | 2.01648000  | -0.33719700 |
| C  | -0.69013600 | 2.04477300  | -2.37693400 |
| O  | -1.80182500 | 2.58297800  | -2.06810400 |
| C  | -3.17757700 | -0.57494100 | -1.55900300 |
| O  | -3.73673800 | 0.55137800  | -1.40396800 |
| C  | -0.55934900 | 3.03364100  | 1.26963000  |
| O  | -1.69441800 | 3.35371200  | 0.79265400  |
| O  | -3.63836000 | 1.30225500  | 1.38960500  |
| C  | -3.03658200 | 0.39943400  | 2.04972600  |
| C  | 0.14622700  | 4.11333600  | 2.10291000  |
| C  | -0.03264100 | 2.51511700  | -3.68167300 |
| C  | -3.91197800 | -1.64843700 | -2.37113800 |
| C  | -3.67208300 | -0.11767600 | 3.34644200  |
| C  | 0.29498200  | 5.39969500  | 1.23308200  |
| H  | 0.81608900  | 6.14234500  | 1.84698600  |
| H  | -0.70678100 | 5.78755900  | 1.02800700  |
| C  | 1.51256600  | 3.63666700  | 2.59836600  |
| H  | 1.98919200  | 4.43268200  | 3.18040000  |
| H  | 1.41154800  | 2.75855700  | 3.23856200  |
| H  | 2.17048200  | 3.37682600  | 1.76890600  |
| C  | -0.75717500 | 4.43592000  | 3.31031000  |
| H  | -0.29229200 | 5.21538200  | 3.92326300  |
| H  | -1.73978200 | 4.78747600  | 2.98569800  |
| H  | -0.89623400 | 3.54891700  | 3.93789400  |
| C  | 0.16326900  | 4.06144400  | -3.61830800 |
| H  | 0.65064900  | 4.36197600  | -4.55215200 |
| H  | -0.82656400 | 4.52667800  | -3.60043400 |
| C  | -0.99900000 | 2.18616400  | -4.83699100 |
| H  | -0.57061800 | 2.52187400  | -5.78730600 |
| H  | -1.16968100 | 1.10601200  | -4.90450100 |
| H  | -1.96436200 | 2.67918500  | -4.69645400 |
| C  | 1.30743600  | 1.80790200  | -3.91293600 |
| H  | 1.17290700  | 0.72450500  | -3.97330000 |

|   |             |             |             |
|---|-------------|-------------|-------------|
| H | 1.74305200  | 2.15395700  | -4.85650000 |
| H | 2.01561700  | 2.01322400  | -3.10959900 |
| C | -5.34207900 | -1.20774700 | -2.70185700 |
| H | -5.84269200 | -1.99339700 | -3.27773500 |
| H | -5.92594100 | -1.01750800 | -1.79902100 |
| H | -5.33904000 | -0.29367900 | -3.30094100 |
| C | -3.12056600 | -1.85463600 | -3.67871600 |
| H | -2.08391000 | -2.13033200 | -3.47254300 |
| H | -3.58316200 | -2.64815300 | -4.27488500 |
| H | -3.11590700 | -0.93794600 | -4.27785400 |
| C | -3.90756800 | -2.97994200 | -1.56119900 |
| H | -4.39800800 | -3.73901700 | -2.18006800 |
| H | -2.86698400 | -3.28227700 | -1.42835000 |
| C | -3.70588800 | -1.67737300 | 3.30689200  |
| H | -2.67273700 | -2.03211200 | 3.26605500  |
| H | -4.13794800 | -2.01341600 | 4.25571900  |
| C | -2.75802100 | 0.32223900  | 4.50937200  |
| H | -2.68979000 | 1.41448900  | 4.55779700  |
| H | -3.16850900 | -0.03451300 | 5.46004100  |
| H | -1.74968000 | -0.08222800 | 4.38953200  |
| C | -5.07647200 | 0.46252900  | 3.54316200  |
| H | -5.50572000 | 0.07580400  | 4.47360500  |
| H | -5.04114200 | 1.55305300  | 3.61045800  |
| H | -5.74368600 | 0.19696000  | 2.72024700  |
| C | 1.03074800  | 5.19862500  | -0.07204200 |
| C | 0.32677800  | 4.79235900  | -1.21220000 |
| C | 2.41505600  | 5.39125700  | -0.17663700 |
| C | 0.96663000  | 4.54932100  | -2.43408500 |
| H | -0.74576300 | 4.65296600  | -1.14459900 |
| C | 3.06723800  | 5.17732500  | -1.39236200 |
| H | 2.97911000  | 5.72124400  | 0.69154000  |
| C | 2.35065400  | 4.75297400  | -2.51355600 |
| H | 4.13871300  | 5.34184100  | -1.46676800 |
| H | 2.86515000  | 4.58734700  | -3.45620400 |
| C | -4.48942400 | -2.25568300 | 2.15099300  |
| C | -3.87431700 | -2.43769200 | 0.90515200  |
| C | -5.84579200 | -2.58391200 | 2.27855700  |
| C | -4.58573700 | -2.89190900 | -0.21315400 |
| H | -2.82416200 | -2.19686100 | 0.79949700  |
| C | -6.56280800 | -3.06841300 | 1.18304400  |
| H | -6.33823600 | -2.46506100 | 3.23983600  |
| C | -5.94055100 | -3.21394600 | -0.05797100 |
| H | -7.61101900 | -3.33105200 | 1.29638800  |
| H | -6.50588900 | -3.58207800 | -0.90973500 |

|    |             |             |             |
|----|-------------|-------------|-------------|
| C  | -0.00117100 | -3.96312000 | -1.94738000 |
| C  | -0.66697600 | -5.04588400 | -1.04184400 |
| C  | -0.54076200 | -4.55009400 | 0.43020000  |
| H  | 0.96301400  | -4.28216700 | -2.35502100 |
| H  | -0.62867000 | -3.65035800 | -2.78467500 |
| H  | -1.71872100 | -5.15624200 | -1.30711000 |
| H  | -0.18380300 | -6.01438200 | -1.16871300 |
| H  | -1.48205000 | -4.58944300 | 0.97939800  |
| H  | 0.23233200  | -5.07958100 | 0.99194100  |
| N  | -0.11977100 | -3.15705100 | 0.25353200  |
| C  | 0.28261400  | -2.09018300 | 1.13813800  |
| O  | 0.22573900  | -2.16449500 | 2.35213400  |
| C  | 0.66693600  | -1.02394700 | 0.21194900  |
| H  | 1.59382800  | -0.49553700 | 0.38660400  |
| C  | 0.21413700  | -2.85479700 | -0.98509000 |
| O  | 0.74624800  | -1.68506300 | -1.11027600 |
| C  | 3.95271000  | -3.15727400 | 2.07431300  |
| H  | 3.85387500  | -4.21371300 | 2.27604700  |
| H  | 4.16803600  | -2.48493000 | 2.89473400  |
| C  | 3.79080700  | -2.68724000 | 0.82825600  |
| C  | 3.47616100  | -3.53017200 | -0.34072900 |
| N  | 3.56139100  | -2.94342500 | -1.51733500 |
| N  | 3.61583600  | -2.42376700 | -2.52441300 |
| C  | 3.13269000  | -4.95257700 | -0.33156100 |
| O  | 2.97231700  | -5.62122900 | 0.67515300  |
| O  | 3.00467000  | -5.44231900 | -1.58594000 |
| C  | 2.69469800  | -6.84769100 | -1.67737800 |
| H  | 2.52111500  | -7.03751800 | -2.73597000 |
| H  | 3.53730600  | -7.44344500 | -1.31798200 |
| H  | 1.80472400  | -7.08790400 | -1.09278400 |
| O  | 3.89527800  | -1.38352300 | 0.45506100  |
| Si | 4.92198100  | -0.16568500 | 1.08425400  |
| C  | 6.66495400  | -0.90866700 | 1.23792600  |
| H  | 6.64286800  | -1.50269600 | 2.16280200  |
| C  | 4.74969700  | 1.20264200  | -0.21287700 |
| H  | 5.21523200  | 2.09428700  | 0.23146100  |
| C  | 4.29414500  | 0.38393700  | 2.79558700  |
| H  | 4.81733900  | -0.26328600 | 3.51544100  |
| C  | 2.78308400  | 0.17083900  | 2.99256400  |
| H  | 2.48720500  | -0.86978000 | 2.84557300  |
| H  | 2.48703500  | 0.45376300  | 4.01172800  |
| H  | 2.18771100  | 0.77856200  | 2.30711600  |
| C  | 4.69278700  | 1.83831100  | 3.10891700  |
| H  | 4.22667200  | 2.54012100  | 2.41090000  |

|   |            |             |             |
|---|------------|-------------|-------------|
| H | 4.36839000 | 2.11909900  | 4.11899800  |
| H | 5.77571100 | 1.99340400  | 3.05898500  |
| C | 7.03798400 | -1.86321100 | 0.09087200  |
| H | 8.03800500 | -2.28544300 | 0.25473100  |
| H | 6.33959900 | -2.70157800 | 0.01367500  |
| H | 7.05578900 | -1.35362700 | -0.87705900 |
| C | 7.73204900 | 0.18754900  | 1.41665200  |
| H | 7.53593100 | 0.81835400  | 2.28987200  |
| H | 8.72581800 | -0.25775700 | 1.55271900  |
| H | 7.78720200 | 0.84318900  | 0.54045600  |
| C | 5.47528600 | 0.89768500  | -1.53405800 |
| H | 5.30959500 | 1.70669300  | -2.25757500 |
| H | 6.55550000 | 0.78960100  | -1.40128000 |
| H | 5.09855500 | -0.02570600 | -1.98916200 |
| C | 3.27006600 | 1.52282300  | -0.49363700 |
| H | 2.68522900 | 1.70446500  | 0.41086100  |
| H | 3.17935500 | 2.41672800  | -1.11880200 |
| H | 2.79338200 | 0.69980400  | -1.03326200 |

#### 4\_Rh

|    |             |             |             |
|----|-------------|-------------|-------------|
| Rh | -1.06324000 | 0.05991900  | 0.01221900  |
| O  | -1.40421500 | 1.17914300  | 1.67624500  |
| O  | -1.44300100 | -1.64123100 | 1.11703300  |
| O  | -0.84267200 | -1.04397300 | -1.70722800 |
| O  | -0.83362200 | 1.78586700  | -1.05753400 |
| Rh | -3.40277700 | 0.16585700  | -0.45615200 |
| C  | -1.85038600 | 2.33567200  | -1.58872000 |
| O  | -3.03986200 | 1.88212900  | -1.52667300 |
| C  | -1.86827400 | -1.30506900 | -2.41861300 |
| O  | -3.05247000 | -0.92825000 | -2.15223400 |
| C  | -2.59263600 | 1.51331000  | 1.98223400  |
| O  | -3.62574400 | 1.22659100  | 1.29529400  |
| O  | -3.64381200 | -1.54866400 | 0.62165300  |
| C  | -2.64095400 | -2.07487800 | 1.19670400  |
| C  | -2.80091800 | 2.30236200  | 3.27808000  |
| C  | -1.63938500 | 3.62926700  | -2.38350500 |
| C  | -1.63132900 | -2.12820100 | -3.68908100 |
| C  | -2.88750300 | -3.31873100 | 2.05782200  |
| C  | -3.60621200 | 3.59869500  | 2.95649100  |
| H  | -3.74807000 | 4.13068600  | 3.90324400  |
| H  | -4.59495900 | 3.30496400  | 2.59257100  |
| C  | -1.45607500 | 2.63852600  | 3.93421900  |
| H  | -1.63611000 | 3.17360300  | 4.87285300  |
| H  | -0.88232100 | 1.73392500  | 4.14777800  |



|   |             |             |             |
|---|-------------|-------------|-------------|
| H | -0.84580400 | 3.27697000  | 3.29121100  |
| C | -3.63664700 | 1.41774800  | 4.22592700  |
| H | -3.82114300 | 1.95293000  | 5.16309700  |
| H | -4.59979700 | 1.15819900  | 3.77825500  |
| H | -3.10253700 | 0.49157600  | 4.46357100  |
| C | -2.62509600 | 4.71753500  | -1.85833300 |
| H | -2.46183500 | 5.61438600  | -2.46548000 |
| H | -3.64539200 | 4.37288700  | -2.04794700 |
| C | -1.97624100 | 3.32431000  | -3.85779100 |
| H | -1.84154000 | 4.22776100  | -4.46144900 |
| H | -1.31365300 | 2.54850000  | -4.25639700 |
| H | -3.00981700 | 2.98460600  | -3.96508800 |
| C | -0.18807900 | 4.11008900  | -2.27588000 |
| H | 0.49893500  | 3.36174400  | -2.67186500 |
| H | -0.06592700 | 5.03083100  | -2.85592700 |
| H | 0.09668600  | 4.31456400  | -1.24189200 |
| C | -2.94763800 | -2.37938100 | -4.43286500 |
| H | -2.75027300 | -2.97438300 | -5.33063400 |
| H | -3.66692700 | -2.91846500 | -3.81318400 |
| H | -3.40731600 | -1.43660600 | -4.74165700 |
| C | -0.66418000 | -1.33504700 | -4.59106500 |
| H | 0.29102700  | -1.16496400 | -4.08989600 |
| H | -0.47990900 | -1.89375600 | -5.51454800 |
| H | -1.09025400 | -0.36304400 | -4.86159900 |
| C | -0.94593900 | -3.47422700 | -3.29572100 |
| H | -0.80551000 | -4.04111600 | -4.22227100 |
| H | 0.04693500  | -3.24259300 | -2.89975800 |
| C | -2.01298200 | -4.49178500 | 1.51625700  |
| H | -0.96224500 | -4.24389200 | 1.68335500  |
| H | -2.24260300 | -5.37040600 | 2.12816900  |
| C | -2.45986600 | -2.98815800 | 3.50181100  |
| H | -3.07548600 | -2.17918900 | 3.90946800  |
| H | -2.59327400 | -3.86955700 | 4.13761400  |
| H | -1.41480100 | -2.67596900 | 3.55175100  |
| C | -4.37160900 | -3.70587700 | 2.04247600  |
| H | -4.51919600 | -4.59576400 | 2.66322300  |
| H | -4.98987600 | -2.90011100 | 2.44701700  |
| H | -4.72302100 | -3.92684900 | 1.03280500  |
| C | -2.93951300 | 4.50478600  | 1.94716000  |
| C | -3.12460800 | 4.28462000  | 0.57623900  |
| C | -2.09276400 | 5.54699600  | 2.34758700  |
| C | -2.46127400 | 5.04762400  | -0.39286400 |
| H | -3.78930200 | 3.49115700  | 0.25563300  |
| C | -1.44392400 | 6.33551800  | 1.39568400  |

|   |             |             |             |
|---|-------------|-------------|-------------|
| H | -1.94869800 | 5.74416900  | 3.40627800  |
| C | -1.61970000 | 6.08383500  | 0.03389700  |
| H | -0.80025500 | 7.15006900  | 1.71625500  |
| H | -1.10933400 | 6.69838800  | -0.70259400 |
| C | -2.22586500 | -4.80442400 | 0.05331100  |
| C | -1.50709900 | -4.09877000 | -0.91925900 |
| C | -3.15311100 | -5.76542400 | -0.37003700 |
| C | -1.70817300 | -4.30470000 | -2.28934600 |
| H | -0.78072600 | -3.36301500 | -0.59950800 |
| C | -3.35403500 | -5.99915900 | -1.73197700 |
| H | -3.70997600 | -6.33668400 | 0.36751600  |
| C | -2.64150500 | -5.27142600 | -2.68698400 |
| H | -4.06596300 | -6.75548300 | -2.05059100 |
| H | -2.80136200 | -5.46129600 | -3.74469900 |
| C | 1.86784700  | -2.22520400 | -0.08742300 |
| C | 1.91575800  | -3.36356300 | 0.96302900  |
| C | 1.46810000  | -2.73461700 | 2.30455400  |
| H | 2.62774300  | -2.32804900 | -0.86287300 |
| H | 0.89458400  | -2.16655600 | -0.57487900 |
| H | 1.27078300  | -4.19817700 | 0.67998400  |
| H | 2.93426900  | -3.75093100 | 1.05373800  |
| H | 0.40701400  | -2.89778100 | 2.50013600  |
| H | 2.04787100  | -3.10822100 | 3.15333500  |
| N | 1.70282500  | -1.31403700 | 2.09054500  |
| C | 1.29257300  | -0.19103100 | 2.73826600  |
| O | 0.84823900  | -0.07994100 | 3.87030800  |
| C | 1.54580800  | 0.90037500  | 1.66342200  |
| H | 0.93788100  | 1.79245000  | 1.76483100  |
| C | 2.06342700  | -0.96687800 | 0.72578600  |
| O | 1.19532100  | 0.16048900  | 0.44669400  |
| C | 3.05690500  | 1.09147100  | 1.45121200  |
| H | 3.58618900  | 1.28706400  | 2.37994000  |
| H | 3.21451800  | 1.91477000  | 0.75670300  |
| C | 3.46422800  | -0.25388000 | 0.76692700  |
| C | 4.46342000  | -1.09886700 | 1.55727800  |
| N | 5.10834400  | -1.99489300 | 0.85383100  |
| N | 5.66435200  | -2.75400400 | 0.21608800  |
| C | 4.68010200  | -1.12521700 | 3.00139200  |
| O | 4.20565500  | -0.33072800 | 3.79712300  |
| O | 5.49008500  | -2.14570300 | 3.35875100  |
| C | 5.79796100  | -2.23180900 | 4.76338200  |
| H | 6.46064000  | -3.09132700 | 4.86192700  |
| H | 6.30091700  | -1.32346200 | 5.10381100  |
| H | 4.88731900  | -2.38535800 | 5.34729000  |

|    |            |             |             |
|----|------------|-------------|-------------|
| O  | 3.94651500 | -0.15807800 | -0.54140400 |
| Si | 4.54502600 | 1.04218900  | -1.57237800 |
| C  | 5.57057800 | 2.34652400  | -0.62501300 |
| H  | 4.83373100 | 3.05566800  | -0.21860100 |
| C  | 5.59743700 | 0.03929100  | -2.80050200 |
| H  | 5.78606600 | 0.70970800  | -3.65275200 |
| C  | 3.03039900 | 1.87216100  | -2.36706100 |
| H  | 2.49300300 | 2.31803100  | -1.51614600 |
| C  | 2.07242100 | 0.86948600  | -3.03270400 |
| H  | 1.86870300 | 0.00748900  | -2.39320700 |
| H  | 1.11008200 | 1.34447400  | -3.25297000 |
| H  | 2.47999300 | 0.50655600  | -3.98211400 |
| C  | 3.38346800 | 3.00793000  | -3.34296800 |
| H  | 4.03125200 | 2.65574200  | -4.15493100 |
| H  | 2.47734600 | 3.41498300  | -3.80911800 |
| H  | 3.89250800 | 3.83818700  | -2.84495200 |
| C  | 6.37876300 | 1.78522500  | 0.55902300  |
| H  | 6.91783900 | 2.59376400  | 1.06973400  |
| H  | 5.75176900 | 1.29151500  | 1.30504600  |
| H  | 7.12560300 | 1.05660800  | 0.22863700  |
| C  | 6.49835800 | 3.14890100  | -1.55981100 |
| H  | 5.96618700 | 3.60361500  | -2.39929800 |
| H  | 6.98823600 | 3.95916800  | -1.00496900 |
| H  | 7.29125200 | 2.51999900  | -1.97625100 |
| C  | 6.96061600 | -0.38720400 | -2.22391000 |
| H  | 7.52465500 | -0.96572800 | -2.96711600 |
| H  | 7.58234500 | 0.46164500  | -1.93101300 |
| H  | 6.83697800 | -1.02876900 | -1.34514500 |
| C  | 4.86357100 | -1.20979500 | -3.32495800 |
| H  | 3.93239900 | -0.96953700 | -3.84260400 |
| H  | 5.50122600 | -1.76044400 | -4.02861200 |
| H  | 4.61981800 | -1.89074200 | -2.50207200 |

**12s**

|    |             |             |             |
|----|-------------|-------------|-------------|
| Rh | -0.03365900 | -0.01805600 | 0.33315500  |
| O  | -1.44485000 | -1.07693100 | 1.37749900  |
| O  | 1.40598300  | -0.97312300 | 1.43798000  |
| O  | 1.35269700  | 0.94043400  | -0.83814400 |
| O  | -1.47105800 | 0.82011900  | -0.86799500 |
| Rh | 0.08027700  | -1.86386800 | -1.23161600 |
| C  | -1.81978300 | 0.22152300  | -1.93748200 |
| O  | -1.37304700 | -0.90140900 | -2.33210300 |
| C  | 1.81940400  | 0.36168400  | -1.87319300 |
| O  | 1.50070000  | -0.80035600 | -2.27209500 |

|   |             |             |             |
|---|-------------|-------------|-------------|
| C | -1.78614200 | -2.23380300 | 0.97084100  |
| O | -1.33443000 | -2.81197100 | -0.06875800 |
| O | 1.54939000  | -2.67362800 | -0.04528200 |
| C | 1.89163800  | -2.07685200 | 1.02186300  |
| C | -2.82800800 | -2.99787900 | 1.79761800  |
| C | -2.86523800 | 0.89941600  | -2.83133900 |
| C | 2.84190600  | 1.16482900  | -2.68454500 |
| C | 2.96848300  | -2.71409000 | 1.90769800  |
| C | -4.06000600 | -3.29457600 | 0.88673900  |
| H | -4.80668900 | -3.79774600 | 1.51058600  |
| H | -3.74543300 | -4.00283800 | 0.11513600  |
| C | -3.24608600 | -2.19448700 | 3.03510600  |
| H | -3.98792900 | -2.76352300 | 3.60550600  |
| H | -2.38737400 | -2.00506900 | 3.68532200  |
| H | -3.68356400 | -1.23139500 | 2.76521300  |
| C | -2.20472000 | -4.33689500 | 2.23697900  |
| H | -2.93653800 | -4.91658000 | 2.80936100  |
| H | -1.89048600 | -4.92803600 | 1.37331500  |
| H | -1.33113300 | -4.16832600 | 2.87625200  |
| C | -4.09376900 | -0.05466800 | -2.96359800 |
| H | -4.84789400 | 0.47248100  | -3.55795700 |
| H | -3.77926100 | -0.93284100 | -3.53453500 |
| C | -2.24209500 | 1.10075200  | -4.22640400 |
| H | -2.97425400 | 1.56194600  | -4.89746500 |
| H | -1.36916500 | 1.76057100  | -4.17142000 |
| H | -1.92631700 | 0.14765800  | -4.65760500 |
| C | -3.28507700 | 2.25496300  | -2.25501000 |
| H | -2.42622000 | 2.92843700  | -2.19215100 |
| H | -4.03413300 | 2.71556400  | -2.90751900 |
| H | -3.71176000 | 2.15274400  | -1.25579500 |
| C | 3.35477100  | 0.35498600  | -3.87997800 |
| H | 4.08098700  | 0.95185500  | -4.44192300 |
| H | 3.84070400  | -0.56975100 | -3.56301500 |
| H | 2.53453900  | 0.09138000  | -4.55341300 |
| C | 2.14422400  | 2.44579500  | -3.18406600 |
| H | 1.77452900  | 3.04183700  | -2.34574100 |
| H | 2.85019100  | 3.05357300  | -3.75978200 |
| H | 1.29747400  | 2.20204400  | -3.83511400 |
| C | 4.01190500  | 1.57340200  | -1.73569700 |
| H | 4.73816800  | 2.12745600  | -2.34050200 |
| H | 3.60970000  | 2.25787000  | -0.98389500 |
| C | 4.12485200  | -1.68422800 | 2.10393800  |
| H | 3.73051200  | -0.84046900 | 2.67700300  |
| H | 4.88878100  | -2.17259900 | 2.71869200  |

|   |             |             |             |
|---|-------------|-------------|-------------|
| C | 2.33424300  | -3.00888500 | 3.28209000  |
| H | 1.50342300  | -3.71614800 | 3.18394200  |
| H | 3.08110300  | -3.45346300 | 3.94820000  |
| H | 1.95617600  | -2.09376900 | 3.74544300  |
| C | 3.48903700  | -4.01588000 | 1.28851400  |
| H | 4.25948000  | -4.44626400 | 1.93690300  |
| H | 2.68277800  | -4.74695500 | 1.18336300  |
| H | 3.92312100  | -3.84798600 | 0.30103300  |
| C | -4.66384500 | -2.07502600 | 0.23014300  |
| C | -4.19282100 | -1.65232600 | -1.01906600 |
| C | -5.67463800 | -1.32783200 | 0.84988900  |
| C | -4.68289500 | -0.49959600 | -1.64520700 |
| H | -3.41716500 | -2.22795100 | -1.51165800 |
| C | -6.18802200 | -0.18560900 | 0.23254400  |
| H | -6.06883900 | -1.64916600 | 1.80997300  |
| C | -5.69382600 | 0.23000100  | -1.00539000 |
| H | -6.98262600 | 0.37776600  | 0.71406100  |
| H | -6.10232600 | 1.11540600  | -1.48459900 |
| C | 4.73720000  | -1.17539500 | 0.81940100  |
| C | 4.18925300  | -0.05534700 | 0.18031300  |
| C | 5.83217000  | -1.81751600 | 0.22562700  |
| C | 4.68548600  | 0.41035300  | -1.04453500 |
| H | 3.35484000  | 0.46241500  | 0.64047300  |
| C | 6.35488400  | -1.35075700 | -0.98163700 |
| H | 6.28184800  | -2.67672000 | 0.71580500  |
| C | 5.78235900  | -0.24757700 | -1.61715100 |
| H | 7.21324700  | -1.84633400 | -1.42692800 |
| H | 6.19400700  | 0.11090600  | -2.55667700 |
| C | -2.05246700 | 4.41011600  | 0.43211100  |
| C | -1.03251700 | 5.15494200  | -0.47693300 |
| C | 0.37275500  | 4.74778900  | 0.04014300  |
| H | -2.35906500 | 5.01518800  | 1.29182300  |
| H | -2.94007500 | 4.05427900  | -0.09105800 |
| H | -1.15157500 | 4.81506600  | -1.50871000 |
| H | -1.17271300 | 6.23551200  | -0.44917900 |
| H | 1.10493300  | 4.60693600  | -0.75486800 |
| H | 0.76684300  | 5.43837500  | 0.78890800  |
| N | 0.07857900  | 3.47066900  | 0.69710600  |
| C | 0.82945200  | 2.51046500  | 1.44393200  |
| O | 2.04990100  | 2.55412100  | 1.59636500  |
| C | -0.18624400 | 1.56562200  | 1.85253900  |
| H | -0.16286300 | 1.07244300  | 2.81492400  |
| C | -1.20755200 | 3.31014500  | 0.95129300  |
| O | -1.46232400 | 2.25678800  | 1.65775000  |

|   |             |            |            |
|---|-------------|------------|------------|
| O | -0.54083500 | 4.88088800 | 3.21478000 |
| H | -0.70963800 | 4.15593000 | 3.84663200 |
| H | 0.43100400  | 4.98590100 | 3.21604900 |
| O | 2.27728900  | 4.95500600 | 3.00293100 |
| H | 2.62078800  | 5.66000100 | 2.43561800 |
| H | 2.39952200  | 4.13420300 | 2.48608300 |
| O | -0.96298100 | 2.71911900 | 4.99741100 |
| H | -0.15144200 | 2.19132600 | 5.03813700 |
| H | -1.63114900 | 2.11099300 | 4.64749400 |

**TS8s**

|    |             |             |             |
|----|-------------|-------------|-------------|
| Rh | -0.04814300 | -0.03285100 | -0.34411000 |
| O  | 1.23252200  | -1.28035900 | -1.34566900 |
| O  | -1.55878400 | -0.73221000 | -1.55001000 |
| O  | -1.33446000 | 1.10307200  | 0.78247200  |
| O  | 1.43042600  | 0.55036900  | 0.94739700  |
| Rh | -0.53559300 | -1.87303300 | 1.17944500  |
| C  | 1.61187800  | -0.09713000 | 2.02842200  |
| O  | 0.97429700  | -1.13829000 | 2.38411100  |
| C  | -1.94095900 | 0.58862600  | 1.77754200  |
| O  | -1.83220200 | -0.61400200 | 2.16674400  |
| C  | 1.38004700  | -2.47806300 | -0.94132300 |
| O  | 0.79387700  | -2.99852400 | 0.05953900  |
| O  | -2.03544400 | -2.42295200 | -0.12084300 |
| C  | -2.22687000 | -1.75671200 | -1.18378400 |
| C  | 2.34815500  | -3.37369800 | -1.72667100 |
| C  | 2.69711000  | 0.41525000  | 2.98402900  |
| C  | -2.86818100 | 1.53347500  | 2.55165100  |
| C  | -3.34557900 | -2.20239000 | -2.13436700 |
| C  | 3.46759500  | -3.86270700 | -0.75531800 |
| H  | 4.16654700  | -4.46391300 | -1.34697200 |
| H  | 3.00777800  | -4.52589700 | -0.01714100 |
| C  | 2.95295600  | -2.62041700 | -2.91734900 |
| H  | 3.63961700  | -3.28082700 | -3.45766800 |
| H  | 2.17170100  | -2.29831800 | -3.61168200 |
| H  | 3.50530100  | -1.73528800 | -2.59628100 |
| C  | 1.56383100  | -4.59935200 | -2.23322100 |
| H  | 2.23395200  | -5.27140700 | -2.77984400 |
| H  | 1.11775900  | -5.15257500 | -1.40292900 |
| H  | 0.76199200  | -4.29355600 | -2.91426900 |
| C  | 3.76765600  | -0.70677300 | 3.15733500  |
| H  | 4.55937900  | -0.30152900 | 3.79681100  |
| H  | 3.30193500  | -1.53616500 | 3.69717600  |
| C  | 2.04276500  | 0.69157700  | 4.35091400  |

|   |             |             |             |
|---|-------------|-------------|-------------|
| H | 2.79922100  | 1.03640700  | 5.06387500  |
| H | 1.27751200  | 1.47098600  | 4.26469000  |
| H | 1.57143000  | -0.20937200 | 4.75131700  |
| C | 3.33631200  | 1.70134600  | 2.44799000  |
| H | 2.58904400  | 2.49264100  | 2.34656500  |
| H | 4.10790900  | 2.04558800  | 3.14509400  |
| H | 3.79570500  | 1.54661500  | 1.47069300  |
| C | -3.57125200 | 0.79833800  | 3.69788400  |
| H | -4.23287700 | 1.49217100  | 4.22734500  |
| H | -4.16921700 | -0.03946700 | 3.33402700  |
| H | -2.84344400 | 0.40628000  | 4.41363500  |
| C | -2.00498200 | 2.67841000  | 3.11862700  |
| H | -1.49561500 | 3.21817300  | 2.31608600  |
| H | -2.63640700 | 3.38456600  | 3.66839600  |
| H | -1.24807900 | 2.29061500  | 3.80937000  |
| C | -3.90122500 | 2.13891500  | 1.55117600  |
| H | -4.56557800 | 2.79204200  | 2.12766200  |
| H | -3.35235400 | 2.76435700  | 0.84207100  |
| C | -4.30887800 | -0.99792500 | -2.37243500 |
| H | -3.75301400 | -0.22213300 | -2.90639100 |
| H | -5.10480600 | -1.35052000 | -3.03743700 |
| C | -2.69645700 | -2.58546800 | -3.47943000 |
| H | -2.00049400 | -3.42181600 | -3.35184900 |
| H | -3.46903100 | -2.89329000 | -4.19209900 |
| H | -2.14711100 | -1.74158400 | -3.90491900 |
| C | -4.10312000 | -3.40709800 | -1.56569100 |
| H | -4.89830400 | -3.70098300 | -2.25921700 |
| H | -3.43315900 | -4.26086600 | -1.43236300 |
| H | -4.55555200 | -3.18043300 | -0.59825500 |
| C | 4.20830800  | -2.75565500 | -0.04065300 |
| C | 3.73095000  | -2.27541100 | 1.18531600  |
| C | 5.35908200  | -2.16875000 | -0.58431700 |
| C | 4.35436700  | -1.21968800 | 1.86259100  |
| H | 2.84466400  | -2.72714500 | 1.61714000  |
| C | 6.00196000  | -1.12436900 | 0.08288200  |
| H | 5.75890800  | -2.53924300 | -1.52419400 |
| C | 5.50221600  | -0.64879300 | 1.29670500  |
| H | 6.90159600  | -0.68572800 | -0.34028100 |
| H | 6.01264400  | 0.15852800  | 1.81481600  |
| C | -4.90586400 | -0.41263400 | -1.11310500 |
| C | -4.22107600 | 0.58827800  | -0.41135500 |
| C | -6.12792000 | -0.87151700 | -0.60280900 |
| C | -4.71004200 | 1.11180000  | 0.79295100  |
| H | -3.28012900 | 0.96005100  | -0.80123300 |

|   |             |             |             |
|---|-------------|-------------|-------------|
| C | -6.64008300 | -0.34560500 | 0.58444300  |
| H | -6.68259000 | -1.63479000 | -1.14180200 |
| C | -5.93404600 | 0.63594100  | 1.28205300  |
| H | -7.59450600 | -0.69898100 | 0.96516600  |
| H | -6.33839200 | 1.04194500  | 2.20531100  |
| C | 2.88002300  | 3.96356200  | -0.54043100 |
| C | 2.19397700  | 4.95047700  | 0.42100000  |
| C | 0.67374600  | 4.76470000  | 0.12556000  |
| H | 2.60316300  | 4.58977000  | -1.98109900 |
| H | 3.93571700  | 3.72464200  | -0.48051000 |
| H | 2.40641900  | 4.69642800  | 1.46605400  |
| H | 2.50077900  | 5.98661800  | 0.25997400  |
| H | 0.05291300  | 4.77340500  | 1.02189500  |
| H | 0.29289000  | 5.51314200  | -0.57597700 |
| N | 0.64817500  | 3.43730500  | -0.50668900 |
| C | -0.28065400 | 2.73877200  | -1.28055100 |
| O | -1.43154200 | 3.12788900  | -1.51103600 |
| C | 0.44010800  | 1.54044100  | -1.71365400 |
| H | 0.29204200  | 1.20170900  | -2.73646200 |
| C | 1.90840900  | 3.01355200  | -0.81756900 |
| O | 1.87458400  | 1.90784700  | -1.54334900 |
| O | -0.29878600 | 5.26568300  | -2.99687500 |
| H | -0.85719800 | 4.60812400  | -2.52881100 |
| H | -0.67939900 | 5.35588800  | -3.88399200 |
| O | 2.72727500  | 2.65333000  | -4.18638300 |
| H | 2.69945900  | 2.05785600  | -3.41651400 |
| H | 2.02770000  | 2.33504400  | -4.77896000 |
| O | 2.28270200  | 4.91614900  | -3.01027500 |
| H | 1.27636200  | 5.06850600  | -3.00396900 |
| H | 2.45480700  | 4.09351500  | -3.58213200 |

### 13s

|    |             |             |             |
|----|-------------|-------------|-------------|
| Rh | -0.04734700 | -0.02908700 | -0.33206700 |
| O  | 1.21577600  | -1.30162100 | -1.32593000 |
| O  | -1.56242500 | -0.70898600 | -1.54888600 |
| O  | -1.32571700 | 1.12686100  | 0.78417000  |
| O  | 1.42319700  | 0.53245200  | 0.97713200  |
| Rh | -0.57741100 | -1.86356800 | 1.19343800  |
| C  | 1.58048300  | -0.11204800 | 2.06314000  |
| O  | 0.93177900  | -1.14878300 | 2.41211700  |
| C  | -1.94607800 | 0.62344300  | 1.77634000  |
| O  | -1.86202200 | -0.58025000 | 2.16867700  |
| C  | 1.34148600  | -2.50023000 | -0.91734200 |
| O  | 0.74586100  | -3.00813000 | 0.08409700  |



|   |             |             |             |
|---|-------------|-------------|-------------|
| O | -2.07530600 | -2.38920600 | -0.11913800 |
| C | -2.25007700 | -1.72074000 | -1.18319500 |
| C | 2.29970900  | -3.41264700 | -1.69624100 |
| C | 2.65544500  | 0.39572000  | 3.03323400  |
| C | -2.86051700 | 1.58666100  | 2.54382800  |
| C | -3.37383600 | -2.14880800 | -2.13673000 |
| C | 3.43554800  | -3.87227500 | -0.72881300 |
| H | 4.13862700  | -4.46986800 | -1.31942500 |
| H | 2.99261200  | -4.53361100 | 0.02137300  |
| C | 2.88465300  | -2.68698800 | -2.91373300 |
| H | 3.56061700  | -3.36061200 | -3.45137800 |
| H | 2.09153300  | -2.37905400 | -3.60126700 |
| H | 3.44396400  | -1.79593100 | -2.62292100 |
| C | 1.51576300  | -4.65439000 | -2.16123800 |
| H | 2.18273000  | -5.33846900 | -2.69669900 |
| H | 1.08097400  | -5.18646500 | -1.31154700 |
| H | 0.70506800  | -4.37069900 | -2.84135800 |
| C | 3.74283600  | -0.71456600 | 3.17857400  |
| H | 4.53948000  | -0.30675000 | 3.81040600  |
| H | 3.29548900  | -1.55529400 | 3.71652400  |
| C | 1.99964400  | 0.63064200  | 4.40663800  |
| H | 2.75290600  | 0.96609700  | 5.12755000  |
| H | 1.22617200  | 1.40385300  | 4.33997200  |
| H | 1.53794700  | -0.28460900 | 4.78498300  |
| C | 3.27472500  | 1.70358500  | 2.52731200  |
| H | 2.51299600  | 2.48265400  | 2.43774200  |
| H | 4.03596800  | 2.04729600  | 3.23614500  |
| H | 3.74117800  | 1.57839500  | 1.54958400  |
| C | -3.58417200 | 0.86703800  | 3.68691300  |
| H | -4.23696100 | 1.57361400  | 4.21062500  |
| H | -4.19439700 | 0.03898600  | 3.32095000  |
| H | -2.86827100 | 0.46367300  | 4.40840900  |
| C | -1.97915300 | 2.71627400  | 3.11356800  |
| H | -1.45533000 | 3.24403000  | 2.31243700  |
| H | -2.59978300 | 3.43548800  | 3.65875200  |
| H | -1.23312200 | 2.31552200  | 3.80876300  |
| C | -3.87595500 | 2.20959100  | 1.53625800  |
| H | -4.53149700 | 2.87658200  | 2.10707100  |
| H | -3.31030400 | 2.82246000  | 0.82925700  |
| C | -4.31597200 | -0.92917600 | -2.38147200 |
| H | -3.74439500 | -0.16350600 | -2.91353200 |
| H | -5.11393100 | -1.26946000 | -3.05050300 |
| C | -2.72755600 | -2.54693200 | -3.47867800 |
| H | -2.04649100 | -3.39473100 | -3.34631400 |

|   |             |             |             |
|---|-------------|-------------|-------------|
| H | -3.50289800 | -2.84367500 | -4.19310300 |
| H | -2.16223900 | -1.71396600 | -3.90483500 |
| C | -4.15463500 | -3.33857800 | -1.56779100 |
| H | -4.95294300 | -3.61973500 | -2.26306500 |
| H | -3.50055300 | -4.20390000 | -1.43033300 |
| H | -4.60578900 | -3.10162700 | -0.60223300 |
| C | 4.16424200  | -2.74618700 | -0.03191200 |
| C | 3.70216700  | -2.27844600 | 1.20444900  |
| C | 5.28703500  | -2.12952600 | -0.60066700 |
| C | 4.31410100  | -1.20855600 | 1.86978800  |
| H | 2.83623400  | -2.75188300 | 1.65448600  |
| C | 5.91679000  | -1.06854200 | 0.05264900  |
| H | 5.67616100  | -2.48994100 | -1.54887900 |
| C | 5.43303900  | -0.60722600 | 1.27845100  |
| H | 6.79477900  | -0.60621300 | -0.39034900 |
| H | 5.93431200  | 0.21261500  | 1.78566100  |
| C | -4.91070600 | -0.33109300 | -1.12696300 |
| C | -4.21222000 | 0.65857000  | -0.42303400 |
| C | -6.14479500 | -0.76506100 | -0.62398200 |
| C | -4.69946300 | 1.19606700  | 0.77566100  |
| H | -3.26070000 | 1.00903300  | -0.80619600 |
| C | -6.65532000 | -0.22516800 | 0.55779200  |
| H | -6.70975500 | -1.51987600 | -1.16418400 |
| C | -5.93608900 | 0.74563700  | 1.25705100  |
| H | -7.61892500 | -0.55915400 | 0.93287700  |
| H | -6.33941000 | 1.16291500  | 2.17574000  |
| C | 3.08539500  | 3.79786100  | -0.55009000 |
| C | 2.47585700  | 4.89095700  | 0.33274600  |
| C | 0.94014200  | 4.77734700  | 0.06935400  |
| H | 2.57867300  | 4.52249200  | -2.31678500 |
| H | 4.14127900  | 3.57734000  | -0.62377700 |
| H | 2.69178900  | 4.70743100  | 1.39265300  |
| H | 2.84095200  | 5.89322900  | 0.09339000  |
| H | 0.34065800  | 4.84944100  | 0.97736400  |
| H | 0.58745400  | 5.53022900  | -0.64354100 |
| N | 0.82466500  | 3.43829800  | -0.52208800 |
| C | -0.14580600 | 2.77751700  | -1.24509500 |
| O | -1.28734100 | 3.21712800  | -1.46700400 |
| C | 0.48886900  | 1.52682200  | -1.68180800 |
| H | 0.29049100  | 1.21949900  | -2.70803600 |
| C | 2.07455900  | 2.94150600  | -0.85195800 |
| O | 1.95126900  | 1.80859000  | -1.55456500 |
| O | -0.25648200 | 5.18854200  | -3.04644200 |
| H | -0.78655800 | 4.55467700  | -2.49961200 |

|   |             |            |             |
|---|-------------|------------|-------------|
| H | -0.70830300 | 5.26502600 | -3.90182900 |
| O | 2.67282200  | 2.38329800 | -4.17553700 |
| H | 2.61814500  | 1.86886000 | -3.34513100 |
| H | 2.01880700  | 1.98883700 | -4.77515800 |
| O | 2.18986100  | 4.67589300 | -3.23966400 |
| H | 1.15850700  | 4.88149900 | -3.16469300 |
| H | 2.34654600  | 3.77398200 | -3.73336100 |

## 12\_Cu

|    |             |             |             |
|----|-------------|-------------|-------------|
| Cu | -0.07640900 | -1.16730500 | 0.39030800  |
| N  | -1.39812500 | -1.85996700 | 1.72707100  |
| N  | -0.20946700 | 0.92370600  | 0.72069500  |
| N  | -1.03553500 | -1.40919700 | -1.32425200 |
| C  | -2.43464900 | -1.94173400 | 2.23805800  |
| C  | -0.75148700 | 1.94713700  | 0.66695500  |
| C  | -1.80360500 | -1.31176600 | -2.18510600 |
| C  | -1.42581800 | 3.23113000  | 0.60128100  |
| H  | -1.12025100 | 3.75657700  | -0.30798600 |
| H  | -2.50693000 | 3.07103900  | 0.57213600  |
| H  | -1.15854300 | 3.83329300  | 1.47418500  |
| C  | -3.75641900 | -1.99903700 | 2.83338100  |
| H  | -4.38709600 | -1.27375600 | 2.31185400  |
| H  | -4.17580500 | -3.00248300 | 2.71905600  |
| H  | -3.70262000 | -1.74706000 | 3.89606700  |
| C  | -2.79251400 | -1.16879300 | -3.23698000 |
| H  | -2.42591800 | -0.46552100 | -3.99006800 |
| H  | -2.97951800 | -2.13763200 | -3.70820300 |
| H  | -3.71405500 | -0.77689900 | -2.79760200 |
| B  | -3.97383700 | 1.00550300  | -0.54571600 |
| F  | -3.64184200 | 0.14185000  | 0.51831500  |
| F  | -2.82435200 | 1.26812800  | -1.31966900 |
| F  | -4.94947400 | 0.39945800  | -1.35728300 |
| F  | -4.46204100 | 2.21794900  | -0.02367900 |
| C  | 3.19172300  | 1.95027400  | 1.53375100  |
| C  | 3.19207700  | 2.73187900  | 0.18579400  |
| C  | 3.24366000  | 1.65822700  | -0.93641900 |
| H  | 4.19833400  | 1.83854300  | 1.95100600  |
| H  | 2.54078300  | 2.38226300  | 2.29616900  |
| H  | 2.26484000  | 3.30246600  | 0.09870000  |
| H  | 4.03128200  | 3.42404300  | 0.11618000  |
| H  | 2.60264300  | 1.89129200  | -1.78731500 |
| H  | 4.25635500  | 1.45284200  | -1.29015300 |
| N  | 2.73756300  | 0.47714200  | -0.23140600 |
| C  | 2.44061200  | -0.88313100 | -0.57410500 |

|   |            |             |             |
|---|------------|-------------|-------------|
| O | 2.57554900 | -1.34548800 | -1.71713900 |
| C | 1.98625100 | -1.42535500 | 0.67413900  |
| H | 2.18973600 | -2.43888900 | 0.99688500  |
| C | 2.73416500 | 0.61678500  | 1.07796200  |
| O | 2.36128300 | -0.45553400 | 1.70149700  |
| O | 5.23821900 | -0.72855800 | -2.07814900 |
| H | 4.29501500 | -0.99558900 | -2.13969000 |
| H | 5.74066700 | -1.50143600 | -2.37385300 |
| O | 5.42168500 | -0.41516200 | 0.68771700  |
| H | 5.44628200 | -0.53890000 | -0.28607600 |
| H | 5.21030100 | -1.29389000 | 1.03077300  |

### 13\_Cu

|    |             |             |             |
|----|-------------|-------------|-------------|
| H  | -2.91502600 | 2.68588400  | -0.92859400 |
| C  | -2.35523800 | -2.27980900 | 0.57083700  |
| C  | -2.97219200 | -2.62430500 | -0.80248100 |
| C  | -3.16742300 | -1.23993600 | -1.48724300 |
| H  | -2.33288400 | -3.01408100 | 1.36957500  |
| H  | -2.34538100 | -3.27705800 | -1.41341800 |
| H  | -3.94920500 | -3.11247900 | -0.68261100 |
| H  | -2.28675900 | -0.94805700 | -2.06609200 |
| H  | -4.05424500 | -1.18708500 | -2.11934300 |
| N  | -3.29814900 | -0.36076800 | -0.31880800 |
| C  | -3.25418600 | 1.01265700  | -0.09035700 |
| O  | -3.48429300 | 1.86320800  | -1.08141900 |
| C  | -2.95483300 | 1.17975400  | 1.22536700  |
| H  | -2.98583800 | 2.01967500  | 1.89702600  |
| C  | -2.80288200 | -0.97797900 | 0.79298300  |
| O  | -2.74065600 | -0.10455400 | 1.80571800  |
| O  | -1.78649100 | 3.76170300  | -0.68707600 |
| H  | -2.08334900 | 4.60001200  | -0.30401400 |
| H  | -1.11323800 | 3.39059700  | -0.05475200 |
| O  | -0.10227800 | 2.55597500  | 1.00480600  |
| H  | 0.75217600  | 2.25246500  | 0.64275000  |
| H  | -0.62037500 | 1.74585300  | 1.13548600  |
| Cu | -0.35965700 | -1.51935700 | 0.31423500  |
| N  | -0.21486900 | 0.01822000  | -1.02344300 |
| N  | 0.46995600  | -0.60806400 | 1.95074100  |
| N  | 1.20672600  | -2.60056400 | -0.34328400 |
| C  | 0.07237700  | 0.89833500  | -1.71838000 |
| C  | 1.21713700  | 0.05462000  | 2.53815500  |
| C  | 2.29237700  | -2.67485400 | -0.74338300 |
| C  | 2.16550700  | 0.90629500  | 3.23117300  |
| H  | 3.16439300  | 0.69241800  | 2.84478800  |

|   |             |             |             |
|---|-------------|-------------|-------------|
| H | 1.91675100  | 1.95178200  | 3.03169300  |
| H | 2.12872200  | 0.71883100  | 4.30741300  |
| C | 0.44503000  | 2.01835400  | -2.56168900 |
| H | 1.51845800  | 2.18546500  | -2.45327600 |
| H | 0.21216000  | 1.79112800  | -3.60577700 |
| H | -0.11004600 | 2.90871900  | -2.25157900 |
| C | 3.64939100  | -2.71582000 | -1.25507900 |
| H | 4.35210500  | -2.82353800 | -0.42492300 |
| H | 3.76771800  | -3.55368500 | -1.94731600 |
| H | 3.84312200  | -1.77016800 | -1.76743900 |
| B | 3.36660100  | 0.86309400  | -0.31438500 |
| F | 2.35984200  | 1.77246500  | 0.14092600  |
| F | 3.43191200  | -0.22233100 | 0.57505800  |
| F | 3.00955900  | 0.40646300  | -1.59657800 |
| F | 4.58663200  | 1.53150500  | -0.35746900 |

**TS9\_Cu**

|    |             |             |             |
|----|-------------|-------------|-------------|
| H  | -2.39644900 | 2.99260000  | -0.87253400 |
| C  | -2.39150900 | -2.26023300 | 0.55258800  |
| C  | -3.05908400 | -2.55361500 | -0.80525100 |
| C  | -3.22948800 | -1.14763100 | -1.45463800 |
| H  | -2.33589400 | -3.01207400 | 1.33232700  |
| H  | -2.47251400 | -3.21375800 | -1.44803800 |
| H  | -4.04563600 | -3.01609600 | -0.66564400 |
| H  | -2.38271400 | -0.89116300 | -2.09633500 |
| H  | -4.15621800 | -1.04021300 | -2.01951500 |
| N  | -3.22957900 | -0.27383200 | -0.27677200 |
| C  | -3.09999100 | 1.08739500  | -0.06185200 |
| O  | -3.28263700 | 1.95113900  | -0.97794900 |
| C  | -2.65514600 | 1.23326900  | 1.28039700  |
| H  | -3.09863500 | 1.95279200  | 1.96027100  |
| C  | -2.74157100 | -0.94351300 | 0.82104100  |
| O  | -2.61607700 | -0.11364700 | 1.84922400  |
| O  | -1.56550300 | 3.68670600  | -0.77873900 |
| H  | -1.89907800 | 4.55289200  | -0.49362100 |
| H  | -0.85808200 | 3.22176200  | 0.04489200  |
| O  | -0.28249900 | 2.58613400  | 0.93772700  |
| H  | 0.52085000  | 2.11978800  | 0.62325700  |
| H  | -1.03566400 | 1.90278200  | 1.14568500  |
| Cu | -0.36318700 | -1.54859200 | 0.25505200  |
| N  | -0.21901300 | -0.05270900 | -1.12496100 |
| N  | 0.43581600  | -0.66032300 | 1.90848700  |
| N  | 1.20779700  | -2.63677500 | -0.37400900 |
| C  | 0.10317600  | 0.77990700  | -1.86166500 |

|   |            |             |             |
|---|------------|-------------|-------------|
| C | 1.12831700 | 0.02601500  | 2.53327000  |
| C | 2.31394400 | -2.69750800 | -0.71661200 |
| C | 2.01035800 | 0.90779400  | 3.27504000  |
| H | 3.03069900 | 0.75178600  | 2.91787500  |
| H | 1.71912300 | 1.94596600  | 3.09452500  |
| H | 1.94954200 | 0.69299600  | 4.34513000  |
| C | 0.53122900 | 1.83252500  | -2.76365200 |
| H | 1.62297000 | 1.83030000  | -2.79281400 |
| H | 0.13046600 | 1.65184000  | -3.76494700 |
| H | 0.16780100 | 2.79731200  | -2.39927100 |
| C | 3.69740500 | -2.71754400 | -1.15314500 |
| H | 4.35438400 | -2.83226900 | -0.28711700 |
| H | 3.86244400 | -3.54337100 | -1.85026200 |
| H | 3.90946600 | -1.76234700 | -1.63987700 |
| B | 3.26132300 | 0.89603900  | -0.23619400 |
| F | 2.12489200 | 1.67331700  | 0.16519000  |
| F | 3.41454300 | -0.17649100 | 0.65491500  |
| F | 3.02952700 | 0.40427700  | -1.53485500 |
| F | 4.38677800 | 1.71324200  | -0.21791200 |

#### 14\_Cu

|    |             |             |             |
|----|-------------|-------------|-------------|
| H  | -2.56657100 | 3.05772500  | -1.04803800 |
| C  | -2.28159700 | -2.39597900 | 0.69446600  |
| C  | -2.75288000 | -2.85816900 | -0.68608700 |
| C  | -3.15258600 | -1.54126600 | -1.42627300 |
| H  | -1.96751100 | -3.05473400 | 1.49234900  |
| H  | -1.97916400 | -3.39604400 | -1.23969300 |
| H  | -3.61893100 | -3.52525500 | -0.59929200 |
| H  | -2.38882000 | -1.22109300 | -2.13843800 |
| H  | -4.11517000 | -1.60942700 | -1.93408200 |
| N  | -3.21868100 | -0.56785800 | -0.32863800 |
| C  | -3.28641600 | 0.77941800  | -0.24439600 |
| O  | -3.55476000 | 1.57817400  | -1.14205200 |
| C  | -2.93206100 | 1.09666400  | 1.20805900  |
| H  | -3.75205300 | 1.59228700  | 1.73262700  |
| C  | -2.68250400 | -1.11172500 | 0.84205000  |
| O  | -2.68719200 | -0.20087400 | 1.82769600  |
| O  | -1.86522300 | 3.74168800  | -0.98087600 |
| H  | -2.32336300 | 4.56191500  | -0.74898400 |
| H  | -0.69452900 | 3.22053300  | 0.30585400  |
| O  | -0.17150100 | 2.82987600  | 1.03666200  |
| H  | 0.58509100  | 2.39591500  | 0.61324800  |
| H  | -2.01394000 | 1.69563300  | 1.26160800  |
| Cu | -0.12792100 | -1.35126100 | 0.30082900  |

|   |             |             |             |
|---|-------------|-------------|-------------|
| N | -0.32419300 | 0.03389000  | -1.11107700 |
| N | 0.44284300  | -0.45986600 | 1.97682500  |
| N | 1.29385200  | -2.61058800 | -0.27523300 |
| C | -0.02154400 | 0.93025600  | -1.77890800 |
| C | 1.05098100  | 0.34362700  | 2.54780400  |
| C | 2.40330100  | -2.72383300 | -0.59395000 |
| C | 1.82705400  | 1.37197200  | 3.21201400  |
| H | 2.85509800  | 1.31588500  | 2.84611100  |
| H | 1.39957000  | 2.34741800  | 2.96402000  |
| H | 1.80877500  | 1.22318400  | 4.29489400  |
| C | 0.38353200  | 2.07179300  | -2.57440400 |
| H | 1.32366000  | 2.44537800  | -2.16154000 |
| H | 0.52885300  | 1.77303000  | -3.61587300 |
| H | -0.38174400 | 2.85085800  | -2.50476800 |
| C | 3.79257900  | -2.80333300 | -1.00010000 |
| H | 4.43310600  | -2.83303300 | -0.11478600 |
| H | 3.96189200  | -3.69697800 | -1.60657600 |
| H | 4.01941400  | -1.90423100 | -1.57848600 |
| B | 3.26737300  | 0.83903600  | -0.34139900 |
| F | 2.25483700  | 1.77873400  | 0.01316400  |
| F | 3.40309100  | -0.09826200 | 0.69756200  |
| F | 2.87874200  | 0.18274300  | -1.52634900 |
| F | 4.46829500  | 1.51855200  | -0.54031400 |

#### TS8\_N

|    |             |             |             |
|----|-------------|-------------|-------------|
| Rh | 0.01792900  | -0.01593800 | 0.62826000  |
| O  | -1.26287800 | -1.57507700 | 0.99149400  |
| O  | 1.56067400  | -1.21336500 | 1.27624200  |
| O  | 1.29275800  | 1.50298300  | 0.09121200  |
| O  | -1.49690700 | 1.12824500  | -0.15948900 |
| Rh | 0.37212600  | -0.94435700 | -1.59919900 |
| C  | -1.74607600 | 1.05411400  | -1.40735300 |
| O  | -1.16807900 | 0.27972100  | -2.23179900 |
| C  | 1.83058900  | 1.50285600  | -1.06476900 |
| O  | 1.66609500  | 0.61568100  | -1.95765400 |
| C  | -1.45656300 | -2.45365300 | 0.09196500  |
| O  | -0.93475500 | -2.45169500 | -1.06774100 |
| O  | 1.90954600  | -2.04791900 | -0.79763100 |
| C  | 2.17461900  | -1.95630700 | 0.43940300  |
| C  | -2.40826900 | -3.61030100 | 0.42455400  |
| C  | -2.84302800 | 1.96753100  | -1.96954200 |
| C  | 2.74736300  | 2.69435700  | -1.36972800 |
| C  | 3.32185200  | -2.80652000 | 1.00091300  |
| C  | -3.62032100 | -3.54349000 | -0.55694500 |

|   |             |             |             |
|---|-------------|-------------|-------------|
| H | -4.31903800 | -4.33306600 | -0.25945200 |
| H | -3.25604700 | -3.78786100 | -1.55889600 |
| C | -2.88215000 | -3.53307800 | 1.88049000  |
| H | -3.56187500 | -4.36670400 | 2.08755000  |
| H | -2.03567000 | -3.60276800 | 2.56958500  |
| H | -3.40669600 | -2.59861700 | 2.08728000  |
| C | -1.66035000 | -4.93682100 | 0.19223600  |
| H | -2.32862200 | -5.78104300 | 0.39241200  |
| H | -1.30289700 | -5.01215500 | -0.83760600 |
| H | -0.79832800 | -5.02025600 | 0.86312700  |
| C | -3.98440600 | 1.06614600  | -2.53681100 |
| H | -4.79330900 | 1.73202200  | -2.85673700 |
| H | -3.60288300 | 0.56015600  | -3.42821700 |
| C | -2.24294900 | 2.79352100  | -3.12282500 |
| H | -3.01342400 | 3.43754300  | -3.56000600 |
| H | -1.43088700 | 3.43447700  | -2.76168900 |
| H | -1.84481300 | 2.14470800  | -3.90641500 |
| C | -3.38018600 | 2.91146100  | -0.88900500 |
| H | -2.58185900 | 3.55504000  | -0.51108600 |
| H | -4.16272700 | 3.54886200  | -1.31422800 |
| H | -3.79841500 | 2.36467100  | -0.04278500 |
| C | 3.33925500  | 2.58872600  | -2.77896800 |
| H | 3.99068900  | 3.44862900  | -2.96803000 |
| H | 3.92707400  | 1.67711500  | -2.90299900 |
| H | 2.54907900  | 2.58557500  | -3.53498600 |
| C | 1.90486500  | 3.98016300  | -1.25186600 |
| H | 1.48194100  | 4.07772100  | -0.24876700 |
| H | 2.53105900  | 4.85587800  | -1.45312600 |
| H | 1.08355300  | 3.97692400  | -1.97716300 |
| C | 3.87344300  | 2.74125800  | -0.29004600 |
| H | 4.53231500  | 3.57760000  | -0.54800100 |
| H | 3.40539600  | 2.97026200  | 0.67101800  |
| C | 4.35436200  | -1.86240300 | 1.69164900  |
| H | 3.86913500  | -1.40956800 | 2.56094800  |
| H | 5.16983800  | -2.49409700 | 2.06065100  |
| C | 2.73256600  | -3.75502900 | 2.06383000  |
| H | 1.98978100  | -4.42512100 | 1.61736600  |
| H | 3.52875000  | -4.37117600 | 2.49483400  |
| H | 2.25182800  | -3.19392600 | 2.86931200  |
| C | 3.98864400  | -3.62737100 | -0.10887100 |
| H | 4.80868400  | -4.21683600 | 0.31490300  |
| H | 3.27397800  | -4.31588200 | -0.56803000 |
| H | 4.39422600  | -2.98927500 | -0.89636300 |
| C | -4.32694200 | -2.20848900 | -0.59777800 |



|   |             |             |             |
|---|-------------|-------------|-------------|
| C | -3.91258500 | -1.23210600 | -1.51166300 |
| C | -5.38196400 | -1.90317100 | 0.27268100  |
| C | -4.50707500 | 0.03477100  | -1.56449100 |
| H | -3.09834200 | -1.45969300 | -2.19105700 |
| C | -5.99469400 | -0.64946600 | 0.22687900  |
| H | -5.73245000 | -2.65360800 | 0.97565600  |
| C | -5.55984400 | 0.31584200  | -0.68359400 |
| H | -6.82227300 | -0.42802000 | 0.89536900  |
| H | -6.04883500 | 1.28535700  | -0.72286500 |
| C | 4.90457300  | -0.77299800 | 0.80035200  |
| C | 4.23139600  | 0.45072000  | 0.69498900  |
| C | 6.06856800  | -0.96363600 | 0.04332100  |
| C | 4.67262900  | 1.46523200  | -0.16443400 |
| H | 3.33622600  | 0.61467700  | 1.28434100  |
| C | 6.53399700  | 0.04437600  | -0.80291800 |
| H | 6.61563500  | -1.89885300 | 0.12561400  |
| C | 5.83856200  | 1.25010400  | -0.91139900 |
| H | 7.44430200  | -0.10839600 | -1.37624100 |
| H | 6.20687900  | 2.03214500  | -1.56977500 |
| C | -3.15635800 | 2.97572000  | 2.69222800  |
| C | -2.65769400 | 4.38032000  | 2.35276600  |
| C | -1.11791700 | 4.20536500  | 2.13275200  |
| H | -1.86163800 | 2.91796800  | 3.73246100  |
| H | -4.18885900 | 2.69162300  | 2.83684000  |
| H | -3.13285900 | 4.74541700  | 1.43973200  |
| H | -2.88225300 | 5.09271000  | 3.15305100  |
| H | -0.86852000 | 4.12192400  | 1.07237800  |
| H | -0.51646500 | 4.97993700  | 2.60449000  |
| N | -0.87168800 | 2.89641800  | 2.77720300  |
| C | 0.23536500  | 1.96873600  | 2.82014600  |
| O | 1.39301400  | 2.31962400  | 2.94326800  |
| C | -0.36276100 | 0.64340600  | 2.63362100  |
| H | -0.06247200 | -0.13941100 | 3.32628400  |
| C | -2.09721900 | 2.10834900  | 2.66830100  |
| O | -1.84801100 | 0.83509000  | 2.78343800  |

#### TS8\_O

|    |             |             |             |
|----|-------------|-------------|-------------|
| Rh | -0.03147900 | 0.09492800  | 0.69638900  |
| O  | 1.20242100  | 1.70971400  | 0.91018600  |
| O  | -1.57909400 | 1.29624100  | 1.13812400  |
| O  | -1.24927000 | -1.51025200 | 0.29735200  |
| O  | 1.62656700  | -1.18685400 | -0.03928000 |
| Rh | -0.31440700 | 0.76125400  | -1.64627200 |
| C  | 1.84484000  | -1.25949000 | -1.34583300 |

|   |             |             |             |
|---|-------------|-------------|-------------|
| O | 1.21413700  | -0.53350000 | -2.13087600 |
| C | -1.77245900 | -1.62935000 | -0.86149400 |
| O | -1.60548800 | -0.82948100 | -1.83286200 |
| C | 1.45618800  | 2.46262900  | -0.08481100 |
| O | 0.99798700  | 2.31337200  | -1.26233600 |
| O | -1.84887800 | 1.95355100  | -1.00921800 |
| C | -2.15707400 | 1.97391900  | 0.21807200  |
| C | 2.41064800  | 3.63732500  | 0.16231100  |
| C | 2.89202600  | -2.19942100 | -1.94099200 |
| C | -2.67025600 | -2.85372900 | -1.07184800 |
| C | -3.30366500 | 2.87756500  | 0.68061300  |
| C | 3.70355400  | 3.40116600  | -0.68259400 |
| H | 4.42196500  | 4.17436400  | -0.38930500 |
| H | 3.45547800  | 3.56718400  | -1.73470700 |
| C | 2.75101300  | 3.75896900  | 1.65303200  |
| H | 3.43573100  | 4.60049300  | 1.80237400  |
| H | 1.84966700  | 3.94228400  | 2.24484100  |
| H | 3.22349300  | 2.85342200  | 2.03679200  |
| C | 1.73542500  | 4.93336400  | -0.32252100 |
| H | 2.41758300  | 5.77946600  | -0.18857200 |
| H | 1.46658300  | 4.86712700  | -1.37948900 |
| H | 0.82606400  | 5.13744200  | 0.25307500  |
| C | 4.10085600  | -1.30395800 | -2.38417700 |
| H | 4.92603800  | -1.98543300 | -2.61382400 |
| H | 3.82033700  | -0.79962800 | -3.31283700 |
| C | 2.27732200  | -2.86008800 | -3.19157500 |
| H | 3.03964300  | -3.47373200 | -3.68052200 |
| H | 1.44061900  | -3.51064600 | -2.91661500 |
| H | 1.91938900  | -2.11343900 | -3.90225400 |
| C | 3.35114200  | -3.29753500 | -0.98146900 |
| H | 2.50144200  | -3.87826000 | -0.61268700 |
| H | 4.01230600  | -3.97880400 | -1.52433900 |
| H | 3.90563500  | -2.90454200 | -0.13133300 |
| C | -3.19926700 | -2.90525500 | -2.50941600 |
| H | -3.83672300 | -3.78718100 | -2.63180500 |
| H | -3.78543400 | -2.01852400 | -2.75721700 |
| H | -2.37630200 | -2.97627300 | -3.22617500 |
| C | -1.83246000 | -4.11397100 | -0.77941900 |
| H | -1.45387600 | -4.10199200 | 0.24539700  |
| H | -2.44910000 | -5.00898300 | -0.91237800 |
| H | -0.98042300 | -4.18583800 | -1.46495400 |
| C | -3.84336300 | -2.78597700 | -0.04398500 |
| H | -4.49728100 | -3.64107700 | -0.24633600 |
| H | -3.42196000 | -2.91822500 | 0.95591400  |

|   |             |             |             |
|---|-------------|-------------|-------------|
| C | -4.36327600 | 2.00242000  | 1.42078300  |
| H | -3.91271000 | 1.63693700  | 2.34766100  |
| H | -5.18896800 | 2.66757400  | 1.69563100  |
| C | -2.72660200 | 3.90200700  | 1.67868900  |
| H | -1.96369500 | 4.52508600  | 1.19972900  |
| H | -3.52651300 | 4.55883600  | 2.03565000  |
| H | -2.27569800 | 3.40277200  | 2.54016600  |
| C | -3.92869000 | 3.61158400  | -0.51122400 |
| H | -4.74935500 | 4.24437000  | -0.15777500 |
| H | -3.19231800 | 4.25101700  | -1.00575300 |
| H | -4.32392700 | 2.91557100  | -1.25355500 |
| C | 4.31976300  | 2.02912600  | -0.53713600 |
| C | 4.00203400  | 1.03016300  | -1.46484400 |
| C | 5.19669100  | 1.70967000  | 0.50854300  |
| C | 4.52414900  | -0.26586700 | -1.37125600 |
| H | 3.32960300  | 1.26977700  | -2.28264900 |
| C | 5.73016900  | 0.42370900  | 0.61593100  |
| H | 5.47653600  | 2.47251600  | 1.22898300  |
| C | 5.39825500  | -0.56125800 | -0.31672900 |
| H | 6.41993700  | 0.19212000  | 1.42268700  |
| H | 5.83399800  | -1.55304800 | -0.23738000 |
| C | -4.88149600 | 0.83112400  | 0.61895800  |
| C | -4.22454300 | -0.40437400 | 0.68351800  |
| C | -5.99556900 | 0.95412800  | -0.22254700 |
| C | -4.63284500 | -1.49861700 | -0.09008200 |
| H | -3.37065600 | -0.51689400 | 1.34268000  |
| C | -6.42922700 | -0.13280900 | -0.98346200 |
| H | -6.52984900 | 1.89885700  | -0.27193000 |
| C | -5.74991700 | -1.35091800 | -0.92307700 |
| H | -7.30235700 | -0.03161500 | -1.62221600 |
| H | -6.09260900 | -2.19400300 | -1.51659600 |
| C | 2.88020400  | -2.41469000 | 2.07923000  |
| C | 2.49830800  | -3.88461900 | 2.31077900  |
| C | 0.96672500  | -3.82559700 | 2.58940400  |
| H | 3.90658900  | -2.07224300 | 2.00965400  |
| H | 2.21501000  | -1.78495900 | 0.72125500  |
| H | 2.72252300  | -4.53369300 | 1.46267400  |
| H | 3.02164300  | -4.29044500 | 3.18507800  |
| H | 0.37987700  | -3.96814800 | 1.67576800  |
| H | 0.63277700  | -4.53993700 | 3.34226400  |
| N | 0.79408100  | -2.43905900 | 3.05156900  |
| C | -0.32325500 | -1.58011500 | 3.12162300  |
| O | -1.47691000 | -1.93149400 | 3.32544800  |
| C | 0.23490700  | -0.25012500 | 2.80519100  |

|   |             |             |            |
|---|-------------|-------------|------------|
| H | -0.09299500 | 0.60719200  | 3.38661200 |
| C | 1.90491100  | -1.70084800 | 2.74877700 |
| O | 1.70071900  | -0.40794200 | 2.92500300 |

## 12\_O

|    |             |             |             |
|----|-------------|-------------|-------------|
| Rh | -0.01812500 | 0.11581800  | 0.67132000  |
| O  | 1.18715700  | 1.74469400  | 0.93824800  |
| O  | -1.58429100 | 1.25590800  | 1.18790900  |
| O  | -1.19255900 | -1.50210100 | 0.20158900  |
| O  | 1.63476600  | -1.06171900 | -0.14746600 |
| Rh | -0.34735600 | 0.86688900  | -1.65791300 |
| C  | 1.83124600  | -1.15768400 | -1.48068500 |
| O  | 1.18283100  | -0.42831800 | -2.22841100 |
| C  | -1.74627500 | -1.57995700 | -0.94614400 |
| O  | -1.62809600 | -0.73277800 | -1.88455300 |
| C  | 1.43517800  | 2.52050900  | -0.04173100 |
| O  | 0.96956400  | 2.40160800  | -1.21954400 |
| O  | -1.87754200 | 2.00545100  | -0.92797400 |
| C  | -2.17972400 | 1.96166600  | 0.30076400  |
| C  | 2.40013200  | 3.68295800  | 0.22093800  |
| C  | 2.87374700  | -2.11863800 | -2.02613900 |
| C  | -2.61945200 | -2.81833700 | -1.17672900 |
| C  | -3.34234500 | 2.81999900  | 0.80767400  |
| C  | 3.69948700  | 3.42995500  | -0.61095300 |
| H  | 4.42657100  | 4.18973500  | -0.30413100 |
| H  | 3.46562500  | 3.60745900  | -1.66439500 |
| C  | 2.72171000  | 3.79862200  | 1.71617000  |
| H  | 3.41859900  | 4.62824000  | 1.87554400  |
| H  | 1.81467100  | 3.99863300  | 2.29395600  |
| H  | 3.17142500  | 2.88529400  | 2.10816100  |
| C  | 1.75160100  | 4.98963200  | -0.27135200 |
| H  | 2.44462600  | 5.82507200  | -0.12673900 |
| H  | 1.49658800  | 4.92888200  | -1.33196600 |
| H  | 0.83743100  | 5.20675300  | 0.29161000  |
| C  | 4.12725500  | -1.24691700 | -2.39455400 |
| H  | 4.94510300  | -1.94862100 | -2.58478700 |
| H  | 3.90814600  | -0.72981700 | -3.33288400 |
| C  | 2.31092800  | -2.76209300 | -3.30667500 |
| H  | 3.08618200  | -3.38706400 | -3.75863800 |
| H  | 1.44885900  | -3.39640900 | -3.07767600 |
| H  | 2.00527400  | -2.00533100 | -4.03139400 |
| C  | 3.24348600  | -3.21638700 | -1.02275000 |
| H  | 2.36107600  | -3.78178200 | -0.70770500 |
| H  | 3.93268000  | -3.91317400 | -1.50654700 |

|   |             |             |             |
|---|-------------|-------------|-------------|
| H | 3.74546000  | -2.82512900 | -0.13605300 |
| C | -3.19314900 | -2.83068700 | -2.59746700 |
| H | -3.81378100 | -3.72268100 | -2.73283900 |
| H | -3.80717400 | -1.94981500 | -2.79355500 |
| H | -2.39237600 | -2.85571000 | -3.34211000 |
| C | -1.74158300 | -4.06608800 | -0.95580500 |
| H | -1.33412800 | -4.08213100 | 0.05815800  |
| H | -2.33902300 | -4.97156100 | -1.10477200 |
| H | -0.90831300 | -4.09095400 | -1.66741200 |
| C | -3.75742800 | -2.81816000 | -0.10705000 |
| H | -4.39278800 | -3.68610100 | -0.31405100 |
| H | -3.29468600 | -2.96632300 | 0.87221200  |
| C | -4.36372600 | 1.89813600  | 1.54442100  |
| H | -3.88394300 | 1.51562600  | 2.44943700  |
| H | -5.19805000 | 2.53516100  | 1.85731600  |
| C | -2.77212200 | 3.83457300  | 1.81991600  |
| H | -2.03436700 | 4.48812900  | 1.34212400  |
| H | -3.58127900 | 4.46202300  | 2.20749400  |
| H | -2.29242400 | 3.32659400  | 2.66054700  |
| C | -4.01002500 | 3.56662900  | -0.35282600 |
| H | -4.84452100 | 4.16234100  | 0.03133500  |
| H | -3.30274400 | 4.24295000  | -0.84049300 |
| H | -4.39537700 | 2.87925500  | -1.10837000 |
| C | 4.29478600  | 2.04800000  | -0.47130500 |
| C | 4.00990500  | 1.07332000  | -1.43510000 |
| C | 5.12224200  | 1.69572600  | 0.60408200  |
| C | 4.51604800  | -0.23019100 | -1.34644000 |
| H | 3.38103300  | 1.33995200  | -2.27944500 |
| C | 5.63684400  | 0.40227700  | 0.70777500  |
| H | 5.37939600  | 2.43966200  | 1.35183500  |
| C | 5.33681100  | -0.55897300 | -0.25971300 |
| H | 6.28684800  | 0.14590600  | 1.53949500  |
| H | 5.75752700  | -1.55733200 | -0.18303300 |
| C | -4.87359300 | 0.74064700  | 0.71744800  |
| C | -4.18254400 | -0.47801800 | 0.71910400  |
| C | -6.01527500 | 0.86255900  | -0.08632300 |
| C | -4.58375100 | -1.55379900 | -0.08366400 |
| H | -3.30746000 | -0.59205700 | 1.34991900  |
| C | -6.44206300 | -0.20781800 | -0.87416100 |
| H | -6.57576200 | 1.79333300  | -0.08530000 |
| C | -5.72820700 | -1.40749000 | -0.87880500 |
| H | -7.33632400 | -0.10816800 | -1.48325600 |
| H | -6.06490500 | -2.23761700 | -1.49364900 |
| C | 3.00717100  | -2.64690600 | 2.31043000  |

|   |             |             |            |
|---|-------------|-------------|------------|
| C | 2.54424300  | -4.09831700 | 2.40689300 |
| C | 0.99017100  | -3.99734800 | 2.55896600 |
| H | 4.02806900  | -2.31829800 | 2.18002400 |
| H | 2.19343000  | -1.64900700 | 0.42767600 |
| H | 2.81366000  | -4.69276100 | 1.52857400 |
| H | 2.98078600  | -4.59874300 | 3.28075400 |
| H | 0.47531100  | -4.19516300 | 1.61192600 |
| H | 0.59055400  | -4.66778900 | 3.32121400 |
| N | 0.79714300  | -2.59114900 | 2.92918400 |
| C | -0.28785900 | -1.72963700 | 2.97448900 |
| O | -1.46165200 | -2.04467700 | 3.14471400 |
| C | 0.30109100  | -0.38493400 | 2.70555100 |
| H | -0.02093000 | 0.43417500  | 3.34649500 |
| C | 1.96936900  | -1.87939100 | 2.70448700 |
| O | 1.75558600  | -0.56482200 | 2.85315800 |

### 13\_O

|    |             |             |             |
|----|-------------|-------------|-------------|
| Rh | -0.09415400 | -0.06019100 | 0.65735500  |
| O  | -1.59062100 | -1.35058600 | 1.18890700  |
| O  | 1.26342200  | -1.49624900 | 1.16236800  |
| O  | 1.35429500  | 1.22279700  | -0.01614300 |
| O  | -1.47467500 | 1.32209400  | -0.00131800 |
| Rh | -0.14711700 | -1.01646900 | -1.58112100 |
| C  | -1.88312700 | 1.33817900  | -1.23188300 |
| O  | -1.51635500 | 0.48455400  | -2.07412000 |
| C  | 1.78052200  | 1.12688700  | -1.21700400 |
| O  | 1.37412600  | 0.28645200  | -2.07515500 |
| C  | -2.03830400 | -2.17069900 | 0.32119100  |
| O  | -1.64656400 | -2.25456000 | -0.88511600 |
| O  | 1.22166600  | -2.38521300 | -0.92052900 |
| C  | 1.63116200  | -2.34380700 | 0.28052300  |
| C  | -3.14400700 | -3.13793900 | 0.76109300  |
| C  | -2.86243700 | 2.42941500  | -1.65590300 |
| C  | 2.86624300  | 2.13236400  | -1.61513600 |
| C  | 2.64855700  | -3.39400100 | 0.74065300  |
| C  | -4.40051100 | -2.88801400 | -0.13119400 |
| H  | -5.18862700 | -3.55673000 | 0.23105700  |
| H  | -4.15467100 | -3.19159800 | -1.15268100 |
| C  | -3.48048800 | -2.95375500 | 2.24525400  |
| H  | -4.27418400 | -3.65311900 | 2.52847500  |
| H  | -2.60668000 | -3.15706600 | 2.87052900  |
| H  | -3.82060500 | -1.93924700 | 2.46164000  |
| C  | -2.64618800 | -4.57604300 | 0.51728900  |
| H  | -3.42538200 | -5.29067700 | 0.80226500  |

|   |             |             |             |
|---|-------------|-------------|-------------|
| H | -2.39698700 | -4.73389500 | -0.53491000 |
| H | -1.75569700 | -4.78705000 | 1.11919600  |
| C | -4.17869900 | 1.72999100  | -2.12333900 |
| H | -4.88730800 | 2.52589500  | -2.37432100 |
| H | -3.95907200 | 1.18123000  | -3.04343800 |
| C | -2.24386100 | 3.18356100  | -2.84923200 |
| H | -2.93892300 | 3.95502100  | -3.19498700 |
| H | -1.30866200 | 3.67317000  | -2.55733400 |
| H | -2.03545200 | 2.50433500  | -3.67917500 |
| C | -3.13925400 | 3.41178400  | -0.51198700 |
| H | -2.22607400 | 3.93910800  | -0.22107700 |
| H | -3.86173900 | 4.16149900  | -0.84748500 |
| H | -3.55538800 | 2.91469400  | 0.36738800  |
| C | 3.30572800  | 1.92128300  | -3.06742300 |
| H | 4.08772200  | 2.64463500  | -3.32116900 |
| H | 3.69955400  | 0.91604500  | -3.22884700 |
| H | 2.46725500  | 2.06953500  | -3.75366700 |
| C | 2.28118700  | 3.54879700  | -1.44553200 |
| H | 1.95009500  | 3.71619200  | -0.41838100 |
| H | 3.04072500  | 4.29703800  | -1.69527500 |
| H | 1.42517700  | 3.69972700  | -2.11245100 |
| C | 4.06971200  | 1.97252900  | -0.63350000 |
| H | 4.84225800  | 2.67919500  | -0.95525500 |
| H | 3.73428700  | 2.27822700  | 0.36145200  |
| C | 3.89120900  | -2.65988900 | 1.33470400  |
| H | 3.57208800  | -2.13758400 | 2.24046000  |
| H | 4.60703900  | -3.43367100 | 1.63249700  |
| C | 1.98940800  | -4.22883600 | 1.85713700  |
| H | 1.09645600  | -4.74209400 | 1.48389200  |
| H | 2.69189100  | -4.98831100 | 2.21617800  |
| H | 1.69825700  | -3.59770400 | 2.70073200  |
| C | 3.05243000  | -4.30884100 | -0.42103100 |
| H | 3.78741900  | -5.04090900 | -0.07039200 |
| H | 2.18700500  | -4.85229800 | -0.80965100 |
| H | 3.49369100  | -3.74484400 | -1.24515400 |
| C | -4.89047000 | -1.45891200 | -0.13876500 |
| C | -4.39915400 | -0.55908000 | -1.09277300 |
| C | -5.81218600 | -0.99032200 | 0.80726900  |
| C | -4.78150600 | 0.78837800  | -1.10668500 |
| H | -3.69758600 | -0.91627700 | -1.83899500 |
| C | -6.21665800 | 0.34575900  | 0.79881500  |
| H | -6.22317500 | -1.67654500 | 1.54227300  |
| C | -5.70220700 | 1.23298400  | -0.14840400 |
| H | -6.94225500 | 0.69515700  | 1.52806900  |

|   |             |             |             |
|---|-------------|-------------|-------------|
| H | -6.02773800 | 2.26942500  | -0.15512800 |
| C | 4.54723300  | -1.67835900 | 0.39144500  |
| C | 4.10272600  | -0.35043500 | 0.34447100  |
| C | 5.57806600  | -2.07049100 | -0.47315800 |
| C | 4.63591200  | 0.57379300  | -0.56315200 |
| H | 3.32023000  | -0.03357400 | 1.02524900  |
| C | 6.13823500  | -1.15510900 | -1.36582800 |
| H | 5.94881500  | -3.09115500 | -0.43827000 |
| C | 5.66665600  | 0.15769300  | -1.41657600 |
| H | 6.94720300  | -1.46482000 | -2.02177100 |
| H | 6.10605900  | 0.86589900  | -2.11368400 |
| C | 1.27761500  | 5.17649800  | 2.07262100  |
| C | 2.07245500  | 3.97303100  | 2.69033800  |
| H | 1.77682200  | 5.55284400  | 1.17392100  |
| H | 1.21498000  | 6.00866600  | 2.78160100  |
| H | 2.92193300  | 3.67323800  | 2.07202700  |
| H | 2.42837700  | 4.17963200  | 3.70171200  |
| N | 1.07486600  | 2.89596400  | 2.71137800  |
| C | 1.10770100  | 1.55229400  | 2.96802400  |
| O | 2.04725400  | 0.93063600  | 3.45616900  |
| C | -0.18402800 | 0.96221700  | 2.50530000  |
| H | -0.78674000 | 0.50528800  | 3.29019100  |
| C | -0.10063400 | 3.34657000  | 2.14672600  |
| O | -1.02311900 | 2.29854700  | 2.14127400  |
| H | -1.39675300 | 2.09747100  | 1.16347500  |
| C | -0.10495000 | 4.61580600  | 1.75208000  |
| H | -0.92248700 | 5.16449100  | 1.30977300  |

#### TS9\_O

|    |             |             |             |
|----|-------------|-------------|-------------|
| Rh | 0.00896600  | -0.03105600 | 0.64238800  |
| O  | -1.21524900 | -1.59320400 | 1.01216700  |
| O  | 1.56000300  | -1.18194600 | 1.34154100  |
| O  | 1.25527200  | 1.48549300  | 0.02244500  |
| O  | -1.50645900 | 1.03393800  | -0.19360400 |
| Rh | 0.47386000  | -0.95928300 | -1.53534800 |
| C  | -1.70636300 | 0.96044800  | -1.44968500 |
| O  | -1.06620500 | 0.20247400  | -2.24697800 |
| C  | 1.84208000  | 1.48692000  | -1.10738000 |
| O  | 1.74514900  | 0.56819600  | -1.97960300 |
| C  | -1.36612800 | -2.49633900 | 0.12299800  |
| O  | -0.80810700 | -2.47626000 | -1.01828700 |
| O  | 2.00161800  | -2.03099400 | -0.70413000 |
| C  | 2.22349500  | -1.92440400 | 0.54121200  |
| C  | -2.28595200 | -3.67261100 | 0.44772100  |



|   |             |             |             |
|---|-------------|-------------|-------------|
| C | -2.80631000 | 1.84530100  | -2.03929100 |
| C | 2.71797400  | 2.70778300  | -1.39279500 |
| C | 3.36613700  | -2.73753300 | 1.15403600  |
| C | -3.46846900 | -3.65900700 | -0.57357600 |
| H | -4.14709300 | -4.46669400 | -0.28005600 |
| H | -3.06690800 | -3.90932200 | -1.55971100 |
| C | -2.80158100 | -3.58101100 | 1.88868400  |
| H | -3.46083600 | -4.43135500 | 2.09044500  |
| H | -1.97334300 | -3.61362100 | 2.60213800  |
| H | -3.36033800 | -2.65982900 | 2.06226000  |
| C | -1.48386900 | -4.97519800 | 0.25933200  |
| H | -2.13092500 | -5.83510000 | 0.45951000  |
| H | -1.09910100 | -5.05914300 | -0.76005000 |
| H | -0.63833300 | -5.01728700 | 0.95420900  |
| C | -3.91362300 | 0.91238400  | -2.62530400 |
| H | -4.72830800 | 1.55978200  | -2.96646000 |
| H | -3.50216500 | 0.40979000  | -3.50551400 |
| C | -2.19632400 | 2.67860700  | -3.18243900 |
| H | -2.97192300 | 3.30556800  | -3.63399500 |
| H | -1.40532100 | 3.33619500  | -2.80584300 |
| H | -1.77155800 | 2.03713900  | -3.95822000 |
| C | -3.38403000 | 2.77972600  | -0.96828600 |
| H | -2.60878300 | 3.44379900  | -0.57647100 |
| H | -4.17113600 | 3.39623300  | -1.41431600 |
| H | -3.80626900 | 2.22568400  | -0.12921100 |
| C | 3.34440400  | 2.61798600  | -2.78788500 |
| H | 3.96771100  | 3.50083900  | -2.96226400 |
| H | 3.96825200  | 1.72852700  | -2.89649700 |
| H | 2.57200400  | 2.58691000  | -3.56166900 |
| C | 1.82406600  | 3.96059000  | -1.28976200 |
| H | 1.37974000  | 4.03815500  | -0.29461600 |
| H | 2.42596700  | 4.85564400  | -1.47762500 |
| H | 1.02094000  | 3.92939400  | -2.03423700 |
| C | 3.81123900  | 2.79099200  | -0.28005900 |
| H | 4.45733700  | 3.63803600  | -0.53370700 |
| H | 3.30784200  | 3.02442200  | 0.66182500  |
| C | 4.36673700  | -1.74719800 | 1.82967800  |
| H | 3.85969600  | -1.28116500 | 2.67931700  |
| H | 5.18966500  | -2.35038700 | 2.22708500  |
| C | 2.76780300  | -3.65613500 | 2.23819600  |
| H | 2.04900800  | -4.35743800 | 1.80097800  |
| H | 3.56727700  | -4.23861100 | 2.70711000  |
| H | 2.25968100  | -3.07570900 | 3.01232300  |
| C | 4.06687500  | -3.58406700 | 0.08535600  |

|   |             |             |             |
|---|-------------|-------------|-------------|
| H | 4.88151200  | -4.14935800 | 0.54922500  |
| H | 3.37093000  | -4.29568500 | -0.36735100 |
| H | 4.48543900  | -2.96646100 | -0.71143900 |
| C | -4.21405100 | -2.34744900 | -0.65487600 |
| C | -3.81049900 | -1.37501900 | -1.57785900 |
| C | -5.29106400 | -2.05711200 | 0.19302900  |
| C | -4.43250500 | -0.12257700 | -1.65488800 |
| H | -2.98607400 | -1.59537300 | -2.24797400 |
| C | -5.93347900 | -0.82015700 | 0.11923200  |
| H | -5.63342700 | -2.80552300 | 0.90185600  |
| C | -5.50553900 | 0.14425000  | -0.79494900 |
| H | -6.77585500 | -0.60935000 | 0.77209700  |
| H | -6.01407000 | 1.10250200  | -0.85152700 |
| C | 4.90230600  | -0.67284300 | 0.91169500  |
| C | 4.20735800  | 0.53469900  | 0.76839200  |
| C | 6.07432500  | -0.86163800 | 0.16712000  |
| C | 4.63361100  | 1.53454600  | -0.11541400 |
| H | 3.30970700  | 0.69902400  | 1.35395400  |
| C | 6.52602100  | 0.13251500  | -0.70257300 |
| H | 6.63913900  | -1.78294000 | 0.27891700  |
| C | 5.80869900  | 1.32117300  | -0.84850600 |
| H | 7.44372100  | -0.01739800 | -1.26449800 |
| H | 6.16798300  | 2.09272500  | -1.52370300 |
| C | -3.14609400 | 4.29958200  | 2.50318400  |
| C | -1.60577500 | 4.29462500  | 2.36193500  |
| H | -3.62001300 | 4.63254300  | 1.56935600  |
| H | -3.48420500 | 4.98938800  | 3.28548100  |
| H | -1.25186900 | 4.75882000  | 1.43900700  |
| H | -1.10575200 | 4.78984100  | 3.20083500  |
| N | -1.25141700 | 2.87304300  | 2.36372300  |
| C | 0.06523100  | 2.45385600  | 2.40864800  |
| O | 0.99590800  | 3.27062300  | 2.43877000  |
| C | 0.20272000  | 0.98942800  | 2.41521300  |
| H | 1.07917400  | 0.63597000  | 2.95951900  |
| C | -2.37632200 | 2.07653800  | 2.66729300  |
| O | -2.26493000 | 0.78804100  | 2.76773500  |
| H | -1.05527400 | 0.56135600  | 2.58945600  |
| C | -3.47711400 | 2.87727600  | 2.82375700  |
| H | -4.45305700 | 2.50901000  | 3.10959900  |

**16'**

|    |            |            |             |
|----|------------|------------|-------------|
| Rh | 2.17830400 | 1.71120900 | 0.72726800  |
| O  | 3.47791400 | 0.99844800 | -0.69452500 |
| O  | 1.54349000 | 3.13013900 | -0.62815300 |

|    |             |             |             |
|----|-------------|-------------|-------------|
| O  | 0.77624400  | 2.29937500  | 2.11657800  |
| O  | 2.74014200  | 0.20998800  | 2.00398000  |
| Rh | 0.48762000  | 0.22465000  | -0.20494800 |
| C  | 2.11347600  | -0.89156200 | 1.95192700  |
| O  | 1.15298000  | -1.15775400 | 1.15412600  |
| C  | -0.38133100 | 1.78100700  | 2.09101100  |
| O  | -0.78077000 | 0.91833000  | 1.24035200  |
| C  | 3.07459900  | 0.13524700  | -1.53012000 |
| O  | 1.89457900  | -0.35426200 | -1.57474800 |
| O  | -0.03148100 | 1.74513200  | -1.46338100 |
| C  | 0.59849500  | 2.85522900  | -1.42728200 |
| C  | 4.04584800  | -0.37236300 | -2.60100900 |
| C  | 2.49338100  | -2.01519400 | 2.92186600  |
| C  | -1.38291200 | 2.22684600  | 3.16157300  |
| C  | 0.17636100  | 3.93472500  | -2.42874700 |
| C  | 4.07614600  | -1.93194000 | -2.55671000 |
| H  | 4.77720500  | -2.26009600 | -3.33152200 |
| H  | 3.08326900  | -2.29641800 | -2.83337100 |
| C  | 5.44653600  | 0.21187100  | -2.38839900 |
| H  | 6.12097800  | -0.16954000 | -3.16200300 |
| H  | 5.42977800  | 1.30285000  | -2.45651300 |
| H  | 5.85294400  | -0.06026400 | -1.41220300 |
| C  | 3.49441400  | 0.07100800  | -3.97187700 |
| H  | 4.15784500  | -0.28149300 | -4.76840100 |
| H  | 2.49501400  | -0.33673000 | -4.14393200 |
| H  | 3.43938400  | 1.16328200  | -4.03444800 |
| C  | 2.76173200  | -3.31668100 | 2.10346100  |
| H  | 3.03447800  | -4.09628200 | 2.82274400  |
| H  | 1.82229400  | -3.61392500 | 1.63005600  |
| C  | 1.27990200  | -2.25707200 | 3.84396100  |
| H  | 1.50727900  | -3.06418200 | 4.54806800  |
| H  | 1.04458500  | -1.35743300 | 4.42296800  |
| H  | 0.39564400  | -2.53688400 | 3.26523500  |
| C  | 3.71569800  | -1.62600200 | 3.75982800  |
| H  | 3.51121900  | -0.73377000 | 4.35757600  |
| H  | 3.96494200  | -2.44546000 | 4.44193800  |
| H  | 4.58687000  | -1.42177200 | 3.13388300  |
| C  | -2.71477800 | 1.48147200  | 3.01477400  |
| H  | -3.41305400 | 1.83051500  | 3.78259900  |
| H  | -3.16595200 | 1.64746900  | 2.03507500  |
| H  | -2.57418100 | 0.40589500  | 3.14227000  |
| C  | -0.76815300 | 1.92516200  | 4.54217500  |
| H  | 0.18362800  | 2.44597500  | 4.67292800  |
| H  | -1.45461800 | 2.24914200  | 5.33116400  |

|   |             |             |             |
|---|-------------|-------------|-------------|
| H | -0.59400400 | 0.85049700  | 4.66330100  |
| C | -1.58770400 | 3.76786300  | 3.02544600  |
| H | -2.33776900 | 4.05816800  | 3.76869400  |
| H | -0.64894600 | 4.25940200  | 3.29564200  |
| C | -0.29224000 | 5.18851400  | -1.62565600 |
| H | 0.57899400  | 5.60656500  | -1.11338100 |
| H | -0.63131300 | 5.92893800  | -2.35773300 |
| C | 1.41319600  | 4.31464500  | -3.26643300 |
| H | 1.77719500  | 3.45205600  | -3.83478400 |
| H | 1.14786900  | 5.10326800  | -3.97797200 |
| H | 2.22476900  | 4.67742500  | -2.63081500 |
| C | -0.93676600 | 3.42615300  | -3.35251200 |
| H | -1.21459600 | 4.21916400  | -4.05439300 |
| H | -0.60027800 | 2.56005200  | -3.92888000 |
| H | -1.82715600 | 3.13201900  | -2.79378200 |
| C | 4.47409200  | -2.50979700 | -1.21825200 |
| C | 3.50333900  | -2.71944200 | -0.23049000 |
| C | 5.80892700  | -2.81152100 | -0.91699100 |
| C | 3.83575000  | -3.18178600 | 1.04925100  |
| H | 2.46669100  | -2.50420800 | -0.45628400 |
| C | 6.15537400  | -3.29840100 | 0.34472800  |
| H | 6.57494800  | -2.67217800 | -1.67478400 |
| C | 5.17754300  | -3.47582800 | 1.32535700  |
| H | 7.19125500  | -3.54187500 | 0.56419100  |
| H | 5.45408400  | -3.85217900 | 2.30636300  |
| C | -1.38189400 | 4.91116100  | -0.61627800 |
| C | -1.04132600 | 4.54189300  | 0.69112000  |
| C | -2.73915500 | 4.97889300  | -0.95909000 |
| C | -2.01243400 | 4.21899600  | 1.64740600  |
| H | 0.00612800  | 4.49467600  | 0.96833000  |
| C | -3.72160900 | 4.67530200  | -0.01456600 |
| H | -3.02539800 | 5.28126700  | -1.96246400 |
| C | -3.36267700 | 4.29356100  | 1.27953100  |
| H | -4.77142700 | 4.74540700  | -0.28561900 |
| H | -4.13220000 | 4.06618700  | 2.01180900  |
| C | -2.81916600 | 0.49822700  | -0.83595000 |
| H | -2.15764300 | 1.32407700  | -0.63208900 |
| H | -3.88155800 | 0.69725100  | -0.91617200 |
| C | -2.31295200 | -0.75458300 | -1.00539800 |
| C | -0.90118300 | -0.99518300 | -0.93370900 |
| C | -0.45206700 | -2.30115900 | -1.46642600 |
| O | -0.23038700 | -2.44148600 | -2.65766800 |
| O | -0.27090300 | -3.23896900 | -0.53395300 |
| C | 0.23682000  | -4.51045500 | -0.99985700 |

|    |             |             |             |
|----|-------------|-------------|-------------|
| H  | 0.21719800  | -5.16487200 | -0.12963700 |
| H  | -0.39888300 | -4.90988400 | -1.79225600 |
| H  | 1.25933200  | -4.39512500 | -1.36494100 |
| O  | -3.09282400 | -1.84533000 | -1.26773900 |
| Si | -4.51368000 | -2.29320500 | -0.42466000 |
| C  | -5.97972200 | -1.29187200 | -1.11777200 |
| H  | -6.02121000 | -0.37636100 | -0.50795100 |
| C  | -4.67739100 | -4.14007600 | -0.80705000 |
| H  | -5.65283200 | -4.44900200 | -0.40456000 |
| C  | -4.23829300 | -1.85875600 | 1.40562200  |
| H  | -4.27928200 | -0.76010000 | 1.44009200  |
| C  | -2.87011700 | -2.27826000 | 1.97063000  |
| H  | -2.03634500 | -1.86778900 | 1.39623000  |
| H  | -2.76054600 | -1.92006900 | 3.00225600  |
| H  | -2.75212200 | -3.36508500 | 1.99060900  |
| C  | -5.38293200 | -2.38951000 | 2.28865800  |
| H  | -5.43632500 | -3.48421800 | 2.26388900  |
| H  | -5.23096600 | -2.09543000 | 3.33497400  |
| H  | -6.35880100 | -2.00131800 | 1.97992900  |
| C  | -5.79350700 | -0.86399500 | -2.58524000 |
| H  | -6.62298800 | -0.22054900 | -2.90527600 |
| H  | -4.86330400 | -0.31119900 | -2.74597200 |
| H  | -5.77585400 | -1.72870700 | -3.25612200 |
| C  | -7.32201200 | -2.02733400 | -0.94559300 |
| H  | -7.51241400 | -2.32212000 | 0.09120700  |
| H  | -8.15650900 | -1.38967400 | -1.26376100 |
| H  | -7.35526300 | -2.93519200 | -1.55804100 |
| C  | -4.69142400 | -4.39059600 | -2.32677700 |
| H  | -4.78590900 | -5.46337500 | -2.53811500 |
| H  | -5.52351900 | -3.88385100 | -2.82432500 |
| H  | -3.76295100 | -4.04292800 | -2.79350700 |
| C  | -3.59344300 | -4.99718400 | -0.13170500 |
| H  | -3.68303100 | -4.98578300 | 0.95806400  |
| H  | -3.67201400 | -6.04253600 | -0.45758800 |
| H  | -2.58825300 | -4.64670700 | -0.38721500 |

**20**

|    |             |             |             |
|----|-------------|-------------|-------------|
| Rh | -0.89061500 | -0.55750000 | -2.26734100 |
| O  | -1.34411700 | -2.49037600 | -1.72962500 |
| O  | -2.80380000 | 0.00982100  | -1.83450800 |
| O  | -0.39083400 | 1.39057900  | -2.64877900 |
| O  | 1.03741000  | -1.14334600 | -2.58372700 |
| Rh | -0.31136200 | -0.13621200 | 0.03815500  |
| C  | 1.79626500  | -1.19838100 | -1.57642000 |

|   |             |             |             |
|---|-------------|-------------|-------------|
| O | 1.55218900  | -0.86612300 | -0.38768900 |
| C | -0.01000700 | 2.10423000  | -1.67898700 |
| O | 0.21299900  | 1.76338600  | -0.48991300 |
| C | -1.21259900 | -2.78589200 | -0.51325300 |
| O | -0.90109900 | -2.03466900 | 0.45084700  |
| O | -2.22659900 | 0.54521400  | 0.29647900  |
| C | -3.03182700 | 0.41366600  | -0.66235900 |
| C | 4.07597900  | -0.59580800 | -2.51751200 |
| C | -5.15523400 | -0.48674300 | 0.38852600  |
| C | 3.21909200  | -1.71500600 | -1.87284000 |
| F | 3.81055900  | -2.13571100 | -0.73242300 |
| F | 3.15160400  | -2.75592700 | -2.73626400 |
| F | 3.62214200  | -0.38379500 | -3.77279000 |
| F | 3.90278300  | 0.54271400  | -1.79758300 |
| C | 5.59247900  | -0.88595300 | -2.59872500 |
| F | 6.18661500  | 0.08926200  | -3.29543200 |
| F | 6.13182700  | -0.93424300 | -1.37644300 |
| F | 5.80047800  | -2.05452300 | -3.21878800 |
| C | 0.09728000  | 3.60677800  | -1.99366200 |
| F | 0.80020200  | 4.24591200  | -1.03173500 |
| F | 0.71180000  | 3.79397700  | -3.18408500 |
| C | -1.33024100 | 4.21789000  | -2.06766700 |
| C | -1.37977800 | 5.75790800  | -1.92520000 |
| F | -2.08292000 | 3.68097200  | -1.06891400 |
| F | -1.88400100 | 3.87781400  | -3.25066400 |
| F | -1.12848100 | 6.11614400  | -0.66241300 |
| F | -2.59630900 | 6.19571200  | -2.26697100 |
| F | -0.47095200 | 6.32218200  | -2.73214800 |
| C | -4.50335000 | 0.72406200  | -0.32956600 |
| C | -1.37181700 | -4.26490800 | -0.11879700 |
| F | -4.57256900 | 1.81002500  | 0.47747300  |
| F | -5.19810200 | 0.97471700  | -1.46036200 |
| F | -5.19859300 | -1.51269200 | -0.49518500 |
| F | -4.38126600 | -0.85395000 | 1.43853000  |
| C | -6.58424100 | -0.24261400 | 0.92781500  |
| F | -6.55570900 | 0.66369900  | 1.91346200  |
| F | -7.38813600 | 0.19576500  | -0.04698800 |
| F | -7.06967900 | -1.39140000 | 1.41049400  |
| F | -1.88754600 | -4.97768200 | -1.14478100 |
| F | -2.19584300 | -4.36973400 | 0.94963800  |
| C | 0.01633600  | -4.85113900 | 0.25962700  |
| F | 0.92310800  | -4.41049900 | -0.65546500 |
| F | 0.37220700  | -4.39023700 | 1.47717300  |
| C | 0.08063400  | -6.39669000 | 0.28854600  |

|    |             |             |             |
|----|-------------|-------------|-------------|
| F  | 1.23826200  | -6.78131900 | 0.83617200  |
| F  | 0.00234800  | -6.89029200 | -0.95085900 |
| F  | -0.93091600 | -6.88097600 | 1.02150700  |
| C  | 2.12385200  | -1.09513700 | 4.06449600  |
| H  | 1.59932300  | -1.83846700 | 4.65367700  |
| H  | 3.20544100  | -1.11477100 | 4.08001300  |
| C  | 1.44430900  | -0.18452400 | 3.34443100  |
| C  | -0.03335200 | -0.22127300 | 3.23657400  |
| N  | -0.61136900 | -1.40399400 | 3.34898800  |
| N  | -1.09944800 | -2.42279600 | 3.42940800  |
| C  | -0.93759700 | 0.94193800  | 3.21771400  |
| O  | -0.58146800 | 2.09904600  | 3.10683300  |
| O  | -2.22364200 | 0.55147700  | 3.34459100  |
| C  | -3.20451600 | 1.60614000  | 3.29395400  |
| H  | -4.16850400 | 1.10606700  | 3.22780700  |
| H  | -3.15102100 | 2.21082800  | 4.20298300  |
| H  | -3.04105700 | 2.23528100  | 2.42006800  |
| O  | 1.98945400  | 0.82200500  | 2.63081700  |
| Si | 3.38137700  | 1.74209500  | 3.03215500  |
| C  | 4.93109200  | 0.66696400  | 2.75981200  |
| H  | 5.06515700  | 0.11226600  | 3.70034100  |
| C  | 3.29699200  | 3.20650400  | 1.83785200  |
| H  | 4.17270000  | 3.82812500  | 2.07738600  |
| C  | 3.28673300  | 2.26041200  | 4.86352800  |
| H  | 3.73415900  | 1.42735400  | 5.42442300  |
| C  | 1.86389000  | 2.47157700  | 5.40806600  |
| H  | 1.26768600  | 1.55741300  | 5.35664900  |
| H  | 1.90577500  | 2.78158800  | 6.46081100  |
| H  | 1.32340500  | 3.24522400  | 4.85644200  |
| C  | 4.15182300  | 3.50957200  | 5.12450300  |
| H  | 3.74869600  | 4.38823400  | 4.60917100  |
| H  | 4.17475700  | 3.74349800  | 6.19650600  |
| H  | 5.18853900  | 3.38167700  | 4.79687900  |
| C  | 4.76694500  | -0.36325600 | 1.62988800  |
| H  | 5.65464400  | -1.00534500 | 1.56117800  |
| H  | 3.89958900  | -1.00916000 | 1.78708000  |
| H  | 4.64129100  | 0.11932800  | 0.65887700  |
| C  | 6.20134800  | 1.51099900  | 2.54558100  |
| H  | 6.38910800  | 2.20330400  | 3.37253600  |
| H  | 7.08319200  | 0.86351500  | 2.45640200  |
| H  | 6.14056200  | 2.10255400  | 1.62559600  |
| C  | 3.41877900  | 2.76755900  | 0.36793000  |
| H  | 3.34619600  | 3.63433800  | -0.30116900 |
| H  | 4.37227000  | 2.27347100  | 0.16566300  |

|   |            |            |            |
|---|------------|------------|------------|
| H | 2.61521200 | 2.07895300 | 0.09612600 |
| C | 2.03265400 | 4.05605900 | 2.05587000 |
| H | 1.99667300 | 4.47845800 | 3.06487500 |
| H | 2.00241900 | 4.89319900 | 1.34676900 |
| H | 1.12750100 | 3.45939900 | 1.91897700 |

**TS16**

|    |             |             |             |
|----|-------------|-------------|-------------|
| Rh | 0.77101600  | 0.90561700  | -2.13338300 |
| O  | 1.09799800  | 2.82343100  | -1.48032600 |
| O  | 2.74170500  | 0.40531300  | -1.81001400 |
| O  | 0.42727500  | -1.02791600 | -2.66533600 |
| O  | -1.20804700 | 1.37604000  | -2.26216700 |
| Rh | 0.32713200  | 0.25622300  | 0.20252300  |
| C  | -1.91726600 | 1.29586800  | -1.22513400 |
| O  | -1.60431800 | 0.89906800  | -0.06758100 |
| C  | 0.13944900  | -1.83535200 | -1.74334800 |
| O  | -0.12171100 | -1.60356900 | -0.53164900 |
| C  | 0.99065600  | 3.01941900  | -0.24896500 |
| O  | 0.83277000  | 2.17188300  | 0.68100800  |
| O  | 2.28646600  | -0.30108300 | 0.30678000  |
| C  | 3.03662900  | -0.05950400 | -0.68468200 |
| C  | -4.13803000 | 0.68364600  | -2.29556400 |
| C  | 5.05038100  | 0.70475500  | 0.63916000  |
| C  | -3.38280600 | 1.72972000  | -1.43653200 |
| F  | -4.01635200 | 1.87098400  | -0.25007100 |
| F  | -3.40663400 | 2.91909500  | -2.08270800 |
| F  | -3.69153300 | 0.75752100  | -3.56574000 |
| F  | -3.85256900 | -0.55367700 | -1.80372600 |
| C  | -5.67619200 | 0.84509500  | -2.32543500 |
| F  | -6.18657400 | 0.00899800  | -3.23700800 |
| F  | -6.21173900 | 0.55951700  | -1.13358800 |
| F  | -5.99564400 | 2.10219300  | -2.65904200 |
| C  | 0.23469700  | -3.31981000 | -2.14295600 |
| F  | -0.37706600 | -4.10631100 | -1.22974500 |
| F  | -0.33757300 | -3.52407800 | -3.34967900 |
| C  | 1.73569200  | -3.72097400 | -2.22713900 |
| C  | 2.00321700  | -5.24063600 | -2.12444100 |
| F  | 2.40582900  | -3.11464000 | -1.20653000 |
| F  | 2.24222500  | -3.27571200 | -3.39408300 |
| F  | 1.78357600  | -5.67314500 | -0.87969600 |
| F  | 3.27835600  | -5.48691500 | -2.44859700 |
| F  | 1.20374200  | -5.90340600 | -2.97129900 |
| C  | 4.52538700  | -0.32804500 | -0.39432900 |
| C  | 0.94028100  | 4.47690000  | 0.24232300  |



|    |             |             |             |
|----|-------------|-------------|-------------|
| F  | 4.67771200  | -1.57518500 | 0.12198800  |
| F  | 5.25611200  | -0.23290000 | -1.52365200 |
| F  | 4.54940900  | 1.92558500  | 0.31101100  |
| F  | 4.59833300  | 0.36948200  | 1.86910300  |
| C  | 6.59013800  | 0.82413800  | 0.71621600  |
| F  | 7.13112600  | -0.39368400 | 0.86296000  |
| F  | 7.07579600  | 1.39397500  | -0.38856800 |
| F  | 6.92014000  | 1.57547000  | 1.77359400  |
| F  | 1.34038900  | 5.32214200  | -0.73045000 |
| F  | 1.74151300  | 4.63426800  | 1.32296800  |
| C  | -0.51970700 | 4.82088100  | 0.65024600  |
| F  | -1.35810300 | 4.30783200  | -0.29159400 |
| F  | -0.79325200 | 4.23499700  | 1.83657300  |
| C  | -0.81891400 | 6.33246200  | 0.77895100  |
| F  | -2.02087500 | 6.49719300  | 1.34290600  |
| F  | -0.82014900 | 6.91384600  | -0.42287700 |
| F  | 0.10812900  | 6.91415600  | 1.55259400  |
| C  | -1.91262800 | 0.29887800  | 3.64647200  |
| H  | -1.37690500 | 1.09294300  | 4.14554800  |
| H  | -2.95074800 | 0.15426400  | 3.91890800  |
| C  | -1.35013500 | -0.47977300 | 2.71194400  |
| C  | 0.03546900  | -0.38991100 | 2.14776400  |
| N  | 0.76489500  | 1.05700900  | 3.17993100  |
| N  | 1.28686700  | 2.02234700  | 3.31935100  |
| C  | 0.99928800  | -1.48952900 | 2.50448600  |
| O  | 0.79401200  | -2.61386500 | 2.10372400  |
| O  | 2.07907200  | -1.09402300 | 3.18413100  |
| C  | 3.13223900  | -2.07812500 | 3.29016700  |
| H  | 3.88428400  | -1.61981000 | 3.93027000  |
| H  | 2.74666800  | -2.99791800 | 3.73283300  |
| H  | 3.53819400  | -2.27494900 | 2.29703200  |
| O  | -1.94731600 | -1.49263900 | 2.05804100  |
| Si | -3.17402100 | -2.56320300 | 2.60645000  |
| C  | -4.83215800 | -1.62597500 | 2.60510400  |
| H  | -4.92932700 | -1.19103500 | 3.61283600  |
| C  | -3.11547100 | -3.94478500 | 1.32141500  |
| H  | -3.97442700 | -4.59869300 | 1.53765400  |
| C  | -2.77125800 | -3.11657700 | 4.38283600  |
| H  | -3.14955300 | -2.31659500 | 5.03635400  |
| C  | -1.27156900 | -3.28025600 | 4.68386700  |
| H  | -0.75234300 | -2.31863000 | 4.63118800  |
| H  | -1.12778800 | -3.67683100 | 5.69810400  |
| H  | -0.77857100 | -3.96059300 | 3.98448200  |
| C  | -3.55331000 | -4.39836300 | 4.73455200  |

|   |             |             |             |
|---|-------------|-------------|-------------|
| H | -3.24066600 | -5.24467400 | 4.11286500  |
| H | -3.38000700 | -4.68031000 | 5.78109300  |
| H | -4.63423000 | -4.27370600 | 4.60467900  |
| C | -4.86853300 | -0.47209100 | 1.58956700  |
| H | -5.82077100 | 0.07028700  | 1.65428900  |
| H | -4.06061800 | 0.24618000  | 1.74734900  |
| H | -4.77491500 | -0.83805100 | 0.56454900  |
| C | -6.03210300 | -2.56997100 | 2.39514500  |
| H | -6.06529100 | -3.38179300 | 3.13068000  |
| H | -6.97631200 | -2.01593400 | 2.47394700  |
| H | -6.00590300 | -3.02720000 | 1.39942400  |
| C | -3.29332700 | -3.37764500 | -0.10092500 |
| H | -3.24536800 | -4.18382100 | -0.84414700 |
| H | -4.25387800 | -2.86802600 | -0.22539600 |
| H | -2.49950500 | -2.66312500 | -0.33342100 |
| C | -1.83090200 | -4.78886900 | 1.41742700  |
| H | -1.75581500 | -5.30983000 | 2.37781900  |
| H | -1.81642500 | -5.55091000 | 0.62770500  |
| H | -0.93994500 | -4.16763100 | 1.29935200  |

## 21

|    |             |             |             |
|----|-------------|-------------|-------------|
| Rh | 1.50464100  | 0.79034900  | -2.14842700 |
| O  | 1.29491700  | 2.71280600  | -1.44270600 |
| O  | 3.25848200  | 0.60211600  | -1.09211000 |
| O  | 1.65219100  | -1.18353600 | -2.68446900 |
| O  | -0.35644000 | 0.90554900  | -3.03732300 |
| Rh | 0.32962000  | 0.04940200  | -0.09828100 |
| C  | -1.36035700 | 0.68996400  | -2.32021400 |
| O  | -1.41661400 | 0.37882200  | -1.09322100 |
| C  | 1.14163900  | -2.02499000 | -1.90196700 |
| O  | 0.43502100  | -1.83692200 | -0.87349300 |
| C  | 0.73555700  | 2.87562500  | -0.33379000 |
| O  | 0.31844900  | 2.00742900  | 0.48878500  |
| O  | 2.17285500  | -0.21594900 | 0.73741600  |
| C  | 3.18156100  | 0.18006400  | 0.08976900  |
| C  | -3.65906900 | -0.38446000 | -2.64900100 |
| C  | 4.70144100  | 1.70709000  | 1.39499200  |
| C  | -2.74997300 | 0.83053000  | -2.97266900 |
| F  | -3.34118500 | 1.95429000  | -2.48646800 |
| F  | -2.63217500 | 0.95109200  | -4.31289700 |
| F  | -2.91222900 | -1.51617200 | -2.73108200 |
| F  | -4.13273300 | -0.25678700 | -1.38938500 |
| C  | -4.87584900 | -0.55073000 | -3.59007300 |
| F  | -5.70762100 | -1.46444100 | -3.07568400 |

|   |             |             |             |
|---|-------------|-------------|-------------|
| F | -5.52725700 | 0.61518300  | -3.70331600 |
| F | -4.48320800 | -0.95540500 | -4.80118900 |
| C | 1.51825200  | -3.49301900 | -2.17148200 |
| F | 0.63226600  | -4.32847400 | -1.58152100 |
| F | 1.54075700  | -3.74439000 | -3.49971000 |
| C | 2.93547700  | -3.76525200 | -1.59237200 |
| C | 3.28047300  | -5.26128300 | -1.40462700 |
| F | 3.03442800  | -3.15941000 | -0.37862600 |
| F | 3.84967800  | -3.21334500 | -2.41938200 |
| F | 2.58363500  | -5.77311800 | -0.38534600 |
| F | 4.58632900  | -5.38628900 | -1.14313100 |
| F | 2.99329900  | -5.94252300 | -2.52209200 |
| C | 4.48509100  | 0.24829100  | 0.90557500  |
| C | 0.42659900  | 4.32513500  | 0.08639800  |
| F | 4.41506600  | -0.57414600 | 1.97987800  |
| F | 5.54222800  | -0.11469300 | 0.14548400  |
| F | 5.12338100  | 2.44979600  | 0.34871600  |
| F | 3.50958900  | 2.20260900  | 1.82260600  |
| C | 5.72092000  | 1.86127200  | 2.54703200  |
| F | 5.22180900  | 1.35820800  | 3.68098400  |
| F | 6.85650900  | 1.21929200  | 2.24229700  |
| F | 5.98950300  | 3.15842900  | 2.72986000  |
| F | 1.13460900  | 5.19618200  | -0.66708000 |
| F | 0.74521700  | 4.51080100  | 1.38903100  |
| C | -1.08793600 | 4.61172000  | -0.10178000 |
| F | -1.48392200 | 4.06774800  | -1.28335400 |
| F | -1.77138100 | 4.01043000  | 0.89808400  |
| C | -1.46759500 | 6.11142700  | -0.11278500 |
| F | -2.79721600 | 6.23113500  | -0.02891800 |
| F | -1.04989700 | 6.69020500  | -1.24216500 |
| F | -0.90767900 | 6.73086900  | 0.93505700  |
| C | -2.49472200 | 0.88261600  | 1.64829100  |
| H | -2.08412400 | 1.45562100  | 0.83298400  |
| H | -3.40330600 | 1.24049700  | 2.11990700  |
| C | -1.86079500 | -0.24254100 | 2.09267900  |
| C | -0.57568100 | -0.58124000 | 1.57635500  |
| C | 0.16887900  | -1.62698800 | 2.32138400  |
| O | 0.07498500  | -2.79966500 | 2.00786800  |
| O | 0.95337700  | -1.12365400 | 3.26697400  |
| C | 1.85815000  | -2.05677500 | 3.91017800  |
| H | 2.47839100  | -1.44776100 | 4.56557200  |
| H | 1.29237700  | -2.78984100 | 4.48873200  |
| H | 2.46889500  | -2.56073400 | 3.15900200  |
| O | -2.33531200 | -1.02758800 | 3.09079700  |

|    |             |             |             |
|----|-------------|-------------|-------------|
| Si | -3.91930100 | -1.69659600 | 3.19005900  |
| C  | -4.47507300 | -2.02513900 | 1.40487200  |
| H  | -4.55955200 | -1.02129600 | 0.96335500  |
| C  | -3.67602200 | -3.20892300 | 4.29727700  |
| H  | -4.68602500 | -3.58688700 | 4.51349100  |
| C  | -5.06027300 | -0.39780600 | 3.98970900  |
| H  | -5.46750400 | 0.18582400  | 3.14987100  |
| C  | -4.32675900 | 0.58151300  | 4.92409000  |
| H  | -3.49160400 | 1.08839000  | 4.43132600  |
| H  | -5.01658900 | 1.35405100  | 5.28688500  |
| H  | -3.92185600 | 0.07031100  | 5.80333500  |
| C  | -6.24771300 | -1.04773600 | 4.72529900  |
| H  | -5.90644800 | -1.61917700 | 5.59535700  |
| H  | -6.94289800 | -0.28151400 | 5.09062700  |
| H  | -6.81816300 | -1.72919600 | 4.08604100  |
| C  | -3.48432000 | -2.82123700 | 0.53839800  |
| H  | -3.79554400 | -2.79533200 | -0.51178600 |
| H  | -2.46357400 | -2.43147200 | 0.58480000  |
| H  | -3.44210700 | -3.87094000 | 0.84152800  |
| C  | -5.87778100 | -2.65837700 | 1.35141300  |
| H  | -6.63036900 | -2.03934700 | 1.84995500  |
| H  | -6.19888400 | -2.78935300 | 0.31020900  |
| H  | -5.89082500 | -3.64770700 | 1.82357600  |
| C  | -2.87670300 | -4.33925600 | 3.62635300  |
| H  | -2.70573700 | -5.15768600 | 4.33760200  |
| H  | -3.40483900 | -4.75877800 | 2.76615000  |
| H  | -1.89736900 | -3.99141200 | 3.28087600  |
| C  | -3.02332900 | -2.81320100 | 5.63594400  |
| H  | -3.62512700 | -2.09179700 | 6.19608500  |
| H  | -2.89142400 | -3.69694900 | 6.27279400  |
| H  | -2.03336100 | -2.37065600 | 5.47730300  |

**21'**

|    |             |             |             |
|----|-------------|-------------|-------------|
| Rh | -1.59249100 | 0.43376500  | -2.06472000 |
| O  | -3.27879900 | -0.27621700 | -1.11291900 |
| O  | -2.03985500 | 2.34934600  | -1.47943700 |
| O  | 0.20137200  | 1.10730300  | -2.83214800 |
| O  | -1.08447400 | -1.51455000 | -2.48845300 |
| Rh | -0.42997000 | 0.17599800  | 0.10807000  |
| C  | -0.50397500 | -2.15466100 | -1.58010400 |
| O  | -0.14249700 | -1.76876700 | -0.43241700 |
| C  | 1.18795300  | 1.13203000  | -2.05949900 |
| O  | 1.27688500  | 0.73768800  | -0.86088400 |
| C  | -3.18759600 | -0.56087200 | 0.10561400  |

|   |             |             |             |
|---|-------------|-------------|-------------|
| O | -2.22341900 | -0.37604400 | 0.90475600  |
| O | -0.87937900 | 2.13906500  | 0.46919000  |
| C | -1.62408800 | 2.73747600  | -0.36024200 |
| C | 1.40769500  | -3.80009800 | -1.88924400 |
| C | -3.58705600 | 3.90510100  | 0.71508400  |
| C | -0.13471200 | -3.62387300 | -1.86178200 |
| F | -0.64361800 | -4.41048400 | -0.88080500 |
| F | -0.64947600 | -4.02045800 | -3.04704200 |
| F | 1.95010600  | -2.70670200 | -2.49130300 |
| F | 1.86452500  | -3.87282600 | -0.62194600 |
| C | 1.89976300  | -5.05537100 | -2.64758900 |
| F | 3.20060700  | -5.24233800 | -2.39668100 |
| F | 1.21805900  | -6.13259900 | -2.23252600 |
| F | 1.73029500  | -4.90645500 | -3.96455200 |
| C | 2.47834700  | 1.79500900  | -2.58154700 |
| F | 3.54546300  | 0.99169600  | -2.35456100 |
| F | 2.38402600  | 2.02823200  | -3.90952400 |
| C | 2.71161700  | 3.14468100  | -1.84668000 |
| C | 3.63735700  | 4.13475800  | -2.59274600 |
| F | 3.25649800  | 2.89912200  | -0.63386600 |
| F | 1.50593200  | 3.74856600  | -1.66524300 |
| F | 4.75556000  | 3.50492200  | -2.97867700 |
| F | 3.96547800  | 5.13832200  | -1.77165900 |
| F | 3.02009100  | 4.63649000  | -3.66576800 |
| C | -2.16941400 | 4.09795000  | 0.11346300  |
| C | -4.36191700 | -1.33459000 | 0.73340000  |
| F | -1.35925300 | 4.62838700  | 1.05997500  |
| F | -2.25168600 | 4.95785800  | -0.92646400 |
| F | -4.44263000 | 3.62167500  | -0.29208700 |
| F | -3.55205900 | 2.84631000  | 1.56528200  |
| C | -4.13761500 | 5.12252900  | 1.49466300  |
| F | -3.45759000 | 5.29071600  | 2.63338800  |
| F | -4.03309600 | 6.23231900  | 0.75228400  |
| F | -5.42611200 | 4.91314000  | 1.78529800  |
| F | -5.44796600 | -1.28653900 | -0.07094000 |
| F | -4.68437000 | -0.80907800 | 1.93757200  |
| C | -3.94300300 | -2.81875600 | 0.93422900  |
| F | -3.22781300 | -3.21528700 | -0.15442000 |
| F | -3.14907400 | -2.90368800 | 2.02322100  |
| C | -5.11970100 | -3.80703600 | 1.11041900  |
| F | -4.64633900 | -4.98804800 | 1.52340900  |
| F | -5.76017200 | -3.97849300 | -0.04994600 |
| F | -5.97989200 | -3.33822800 | 2.02429200  |
| C | 1.92269900  | 1.88969900  | 1.87097800  |

|    |             |             |             |
|----|-------------|-------------|-------------|
| H  | 1.19967900  | 2.36723500  | 1.22713400  |
| H  | 2.74060200  | 2.48806000  | 2.25554800  |
| C  | 1.77293400  | 0.58154500  | 2.22451900  |
| C  | 0.62136100  | -0.14238800 | 1.78974500  |
| C  | 0.25531400  | -1.34465100 | 2.57616800  |
| O  | -0.50559500 | -1.22554600 | 3.52093900  |
| O  | 0.76367000  | -2.47492900 | 2.10783200  |
| C  | 0.27439000  | -3.70739800 | 2.69047700  |
| H  | 0.79948500  | -4.49949800 | 2.15984600  |
| H  | 0.50220000  | -3.74206800 | 3.75740800  |
| H  | -0.80229800 | -3.78670700 | 2.53112600  |
| O  | 2.64684900  | -0.08600800 | 3.02289700  |
| Si | 4.33270200  | -0.25854600 | 2.70057700  |
| C  | 5.23435500  | 1.27043000  | 3.38923400  |
| H  | 5.23434700  | 1.99696900  | 2.56204500  |
| C  | 4.79984600  | -1.83585300 | 3.63571900  |
| H  | 5.89414500  | -1.91184000 | 3.55653600  |
| C  | 4.51071600  | -0.30036600 | 0.80947800  |
| H  | 4.14524300  | 0.68215700  | 0.47789300  |
| C  | 3.65652500  | -1.36376600 | 0.10071800  |
| H  | 2.61808600  | -1.37506200 | 0.43876600  |
| H  | 3.64380100  | -1.17914000 | -0.97800300 |
| H  | 4.05816000  | -2.36840200 | 0.25685900  |
| C  | 5.98169700  | -0.40415100 | 0.36653200  |
| H  | 6.44371400  | -1.33581100 | 0.71398600  |
| H  | 6.05117900  | -0.39609600 | -0.72874100 |
| H  | 6.58634100  | 0.42902300  | 0.73723800  |
| C  | 4.53211200  | 1.93086600  | 4.59010500  |
| H  | 5.04159300  | 2.86254100  | 4.86642800  |
| H  | 3.48469600  | 2.17192800  | 4.38605500  |
| H  | 4.54712600  | 1.27983900  | 5.47018300  |
| C  | 6.70362700  | 0.96451500  | 3.73985800  |
| H  | 7.25455000  | 0.51535800  | 2.90760300  |
| H  | 7.23182700  | 1.88311300  | 4.02463900  |
| H  | 6.76978000  | 0.27587500  | 4.58924900  |
| C  | 4.44201300  | -1.71321100 | 5.12912900  |
| H  | 4.72995500  | -2.62470600 | 5.66792900  |
| H  | 4.94962800  | -0.87240400 | 5.61023900  |
| H  | 3.36373900  | -1.57583500 | 5.26845900  |
| C  | 4.19090000  | -3.11808900 | 3.04364600  |
| H  | 4.56996000  | -3.32802800 | 2.04039900  |
| H  | 4.43456500  | -3.98220900 | 3.67508700  |
| H  | 3.10049200  | -3.05222500 | 2.97954800  |

|    |             |             |             |
|----|-------------|-------------|-------------|
| Rh | 1.30367100  | 0.56554100  | -2.62805400 |
| O  | 3.05371100  | 1.01815700  | -1.61539600 |
| O  | 1.89546800  | -1.40970900 | -2.71203100 |
| O  | -0.54751200 | 0.07630100  | -3.41049500 |
| O  | 0.68762000  | 2.51349800  | -2.34860900 |
| Rh | 0.32382900  | 0.06306500  | -0.38674800 |
| C  | 0.19230700  | 2.80327400  | -1.23107800 |
| O  | -0.00560400 | 2.07571300  | -0.22025300 |
| C  | -1.46740000 | -0.20320300 | -2.60164000 |
| O  | -1.46831300 | -0.19393500 | -1.33897100 |
| C  | 3.06499600  | 0.87057600  | -0.36932500 |
| O  | 2.18842600  | 0.37770800  | 0.39694700  |
| O  | 0.77862800  | -1.89875100 | -0.78710100 |
| C  | 1.55271600  | -2.14253000 | -1.74907000 |
| C  | -1.85919700 | 4.27708600  | -0.96461000 |
| C  | 3.73892300  | -3.26579100 | -1.16573400 |
| C  | -0.30680700 | 4.24832900  | -1.04164400 |
| F  | 0.19145200  | 4.76297100  | 0.11104700  |
| F  | 0.09733500  | 5.03124600  | -2.07010100 |
| F  | -2.35097400 | 3.33698400  | -1.81757400 |
| F  | -2.24715800 | 3.97040000  | 0.29068000  |
| C  | -2.49944100 | 5.63357700  | -1.34010600 |
| F  | -3.79822500 | 5.61623400  | -1.01658300 |
| F  | -1.89824000 | 6.62347900  | -0.66420500 |
| F  | -2.38556400 | 5.86349100  | -2.65184300 |
| C  | -2.79869800 | -0.69690200 | -3.20324800 |
| F  | -3.83374900 | 0.04082400  | -2.72554600 |
| F  | -2.78428100 | -0.59134000 | -4.55239200 |
| C  | -3.03851500 | -2.18301300 | -2.82436900 |
| C  | -4.07912800 | -2.91934900 | -3.70017200 |
| F  | -3.45790900 | -2.25708300 | -1.54167500 |
| F  | -1.85598900 | -2.84851900 | -2.93358900 |
| F  | -5.20374300 | -2.19467000 | -3.77869500 |
| F  | -4.36481700 | -4.10328100 | -3.14355100 |
| F  | -3.60102100 | -3.12661200 | -4.93046000 |
| C  | 2.27920000  | -3.49706700 | -1.67049800 |
| C  | 4.27300400  | 1.45446300  | 0.38486900  |
| F  | 1.64165100  | -4.33264100 | -0.80989400 |
| F  | 2.33338300  | -4.09437900 | -2.88216600 |
| F  | 4.52955800  | -3.00600400 | -2.22588700 |
| F  | 3.76164100  | -2.17971000 | -0.34240600 |
| C  | 4.34746600  | -4.44600700 | -0.37352800 |
| F  | 3.76043000  | -4.55178300 | 0.82717300  |

|    |             |             |             |
|----|-------------|-------------|-------------|
| F  | 4.18197600  | -5.59138600 | -1.04629100 |
| F  | 5.65476700  | -4.23136300 | -0.19201800 |
| F  | 5.30759800  | 1.67930600  | -0.45705300 |
| F  | 4.68478000  | 0.59829300  | 1.35572300  |
| C  | 3.86330600  | 2.79518000  | 1.05746400  |
| F  | 3.09008400  | 3.49899000  | 0.18648700  |
| F  | 3.13016700  | 2.52489800  | 2.15862000  |
| C  | 5.04803900  | 3.69890100  | 1.47280700  |
| F  | 4.59929000  | 4.69251300  | 2.24809400  |
| F  | 5.63591600  | 4.22426000  | 0.39333700  |
| F  | 5.94942400  | 2.98453100  | 2.16151900  |
| C  | -1.47282200 | -2.60127900 | 1.12138900  |
| H  | -1.14155500 | -2.51376300 | 0.09103200  |
| H  | -2.47542400 | -3.03823900 | 1.13115400  |
| C  | -1.44227500 | -1.25390800 | 1.79719800  |
| C  | -0.58967000 | -0.27133700 | 1.47636800  |
| C  | -0.27139300 | 0.77821900  | 2.45990900  |
| O  | 0.65800600  | 0.67396600  | 3.25525400  |
| O  | -1.01751500 | 1.89332300  | 2.36908900  |
| C  | -0.56331400 | 3.03443800  | 3.11771800  |
| H  | -1.17489800 | 3.86926600  | 2.77805500  |
| H  | -0.70182000 | 2.87729800  | 4.19045600  |
| H  | 0.49135800  | 3.22742300  | 2.91024300  |
| O  | -2.24217800 | -1.17534200 | 2.93327500  |
| Si | -3.87428900 | -0.64187900 | 2.87412300  |
| C  | -4.90066900 | -2.14038300 | 3.45150400  |
| H  | -4.77720800 | -2.91051900 | 2.67438100  |
| C  | -4.04358100 | 0.70659000  | 4.21807300  |
| H  | -4.95582600 | 0.42439500  | 4.76381600  |
| C  | -4.20802000 | -0.22141900 | 1.03715700  |
| H  | -3.50027300 | -0.88846500 | 0.52943900  |
| C  | -3.82998400 | 1.20154700  | 0.59239800  |
| H  | -2.83987700 | 1.49505200  | 0.93986600  |
| H  | -3.82990300 | 1.25641100  | -0.50090800 |
| H  | -4.54956800 | 1.93999800  | 0.95873100  |
| C  | -5.60050500 | -0.59193600 | 0.50099600  |
| H  | -6.38961300 | 0.03107100  | 0.93776800  |
| H  | -5.62841300 | -0.43784000 | -0.58531700 |
| H  | -5.85671500 | -1.63961300 | 0.68685100  |
| C  | -4.37275900 | -2.71113100 | 4.78022400  |
| H  | -4.89502100 | -3.64051100 | 5.04245700  |
| H  | -3.30262900 | -2.92696000 | 4.74864700  |
| H  | -4.54077800 | -2.00604700 | 5.60258000  |
| C  | -6.40332400 | -1.83802200 | 3.59588400  |



|   |             |             |            |
|---|-------------|-------------|------------|
| H | -6.85959800 | -1.48694800 | 2.66808800 |
| H | -6.94958900 | -2.73598600 | 3.91305600 |
| H | -6.57889700 | -1.07177700 | 4.36008700 |
| C | -2.87681400 | 0.63295700  | 5.22202400 |
| H | -3.03154300 | 1.34898200  | 6.03990300 |
| H | -2.77607600 | -0.36126100 | 5.66833700 |
| H | -1.92338200 | 0.87103200  | 4.74392100 |
| C | -4.24437000 | 2.14854000  | 3.72755100 |
| H | -5.13940900 | 2.24693000  | 3.10549600 |
| H | -4.36172500 | 2.82856900  | 4.58204100 |
| H | -3.39088400 | 2.49719700  | 3.14155000 |
| C | 0.71464500  | -2.92040800 | 2.31029900 |
| C | -0.43252200 | -3.22868300 | 4.32800900 |
| C | -0.53035300 | -3.61138700 | 1.85796600 |
| H | -0.10329700 | -3.77923200 | 5.20909000 |
| H | -1.06631800 | -2.39029100 | 4.61495900 |
| H | -0.28557200 | -4.43015100 | 1.17807700 |
| C | -1.06632100 | -4.12559100 | 3.23312800 |
| H | -2.15388200 | -4.09053900 | 3.26887000 |
| H | -0.74585700 | -5.15908800 | 3.38075900 |
| O | 1.75970900  | -2.50359900 | 1.67275200 |
| C | 2.62542600  | -1.80926800 | 2.63730900 |
| H | 3.60573400  | -2.28559000 | 2.60985000 |
| H | 2.66938500  | -0.76336000 | 2.33199400 |
| C | 1.91257800  | -1.98225900 | 3.97026200 |
| O | 2.23150500  | -1.64248800 | 5.07690100 |
| N | 0.74109300  | -2.69868400 | 3.61321300 |

## TS17

|    |             |             |             |
|----|-------------|-------------|-------------|
| Rh | 1.26256000  | 0.24293100  | -2.64487100 |
| O  | 3.12748200  | 0.55363500  | -1.83783800 |
| O  | 1.58990600  | -1.78855200 | -2.61093900 |
| O  | -0.66118700 | -0.10056900 | -3.28347300 |
| O  | 0.89450900  | 2.26472100  | -2.48921600 |
| Rh | 0.40217700  | 0.03041400  | -0.32436900 |
| C  | 0.45045600  | 2.69152300  | -1.39464000 |
| O  | 0.19514600  | 2.06648200  | -0.32964800 |
| C  | -1.54042700 | -0.31271300 | -2.41107700 |
| O  | -1.46399000 | -0.23246100 | -1.15378100 |
| C  | 3.21611800  | 0.54482000  | -0.58458500 |
| O  | 2.33491100  | 0.30845900  | 0.28579200  |
| O  | 0.67204300  | -1.99577800 | -0.53543600 |
| C  | 1.24595300  | -2.41401400 | -1.57597200 |
| C  | -1.44152900 | 4.37770400  | -1.27857600 |

|   |             |             |             |
|---|-------------|-------------|-------------|
| C | 3.07141300  | -4.06283600 | -0.89426400 |
| C | 0.10052400  | 4.19034600  | -1.32364300 |
| F | 0.63539700  | 4.74007500  | -0.20462700 |
| F | 0.59219400  | 4.84527700  | -2.40182000 |
| F | -2.01231600 | 3.43536500  | -2.07877400 |
| F | -1.87059000 | 4.19159700  | -0.01317900 |
| C | -1.94131200 | 5.76279000  | -1.75121500 |
| F | -3.23817700 | 5.89268500  | -1.44670500 |
| F | -1.25176300 | 6.73218200  | -1.13273700 |
| F | -1.79405700 | 5.89240300  | -3.07312600 |
| C | -2.89589800 | -0.83628000 | -2.92968800 |
| F | -3.92414800 | -0.14154800 | -2.38464500 |
| F | -2.96653400 | -0.72132000 | -4.27630700 |
| C | -3.06046600 | -2.33350700 | -2.55082900 |
| C | -4.12418800 | -3.10033000 | -3.37159800 |
| F | -3.39991700 | -2.42537400 | -1.24469500 |
| F | -1.86427000 | -2.95774600 | -2.73023200 |
| F | -5.27182300 | -2.40879700 | -3.38871300 |
| F | -4.34474400 | -4.29216700 | -2.80366000 |
| F | -3.70526700 | -3.29061800 | -4.62567500 |
| C | 1.64232200  | -3.90177200 | -1.53240100 |
| C | 4.57951400  | 0.92885800  | 0.01912300  |
| F | 0.73519500  | -4.59736400 | -0.79290800 |
| F | 1.65851100  | -4.42547600 | -2.77420100 |
| F | 3.93006500  | -4.50754100 | -1.83257900 |
| F | 3.50700800  | -2.84657200 | -0.46116600 |
| C | 3.14897500  | -5.02842500 | 0.31026300  |
| F | 2.38755100  | -4.59100500 | 1.32330000  |
| F | 2.74489200  | -6.25142900 | -0.05012100 |
| F | 4.41721500  | -5.09740500 | 0.73259000  |
| F | 5.52246800  | 1.02733400  | -0.94543400 |
| F | 4.97268900  | -0.01842200 | 0.91102400  |
| C | 4.46952200  | 2.28847700  | 0.76146900  |
| F | 3.67614600  | 3.11481500  | 0.02691500  |
| F | 3.88892700  | 2.08991900  | 1.96407300  |
| C | 5.82101700  | 3.00557800  | 0.99241800  |
| F | 5.65157700  | 4.01116200  | 1.85797400  |
| F | 6.29260900  | 3.49906400  | -0.15677500 |
| F | 6.71262800  | 2.14215600  | 1.50040500  |
| C | -1.64111300 | -2.15184700 | 1.49756800  |
| H | -1.51957100 | -2.19704900 | 0.41712800  |
| H | -2.59687900 | -2.60840500 | 1.76030900  |
| C | -1.55745000 | -0.71258100 | 1.96344300  |
| C | -0.43617800 | -0.00781700 | 1.65394600  |

|    |             |             |             |
|----|-------------|-------------|-------------|
| C  | -0.07933000 | 1.20329300  | 2.41820500  |
| O  | 0.96717400  | 1.31877800  | 3.04577700  |
| O  | -0.98014000 | 2.20027000  | 2.33297900  |
| C  | -0.59375700 | 3.45515800  | 2.91971200  |
| H  | -1.41710700 | 4.13971700  | 2.72071800  |
| H  | -0.44206200 | 3.35140400  | 3.99681900  |
| H  | 0.32346100  | 3.82455200  | 2.45570300  |
| O  | -2.44862500 | -0.30422500 | 2.88803400  |
| Si | -4.12621800 | 0.04140000  | 2.71523400  |
| C  | -5.06964000 | -1.52492500 | 3.24529100  |
| H  | -4.96515900 | -2.23001800 | 2.40608100  |
| C  | -4.43561800 | 1.43866400  | 3.96855400  |
| H  | -5.42635600 | 1.22302500  | 4.39319100  |
| C  | -4.37944300 | 0.38622800  | 0.86552500  |
| H  | -3.89831100 | -0.48099200 | 0.39010400  |
| C  | -3.65533400 | 1.63958300  | 0.34550500  |
| H  | -2.61623400 | 1.68641600  | 0.67033200  |
| H  | -3.66363500 | 1.64578500  | -0.74821500 |
| H  | -4.15350700 | 2.55221700  | 0.68223800  |
| C  | -5.85051000 | 0.38288100  | 0.41679300  |
| H  | -6.43499700 | 1.16125400  | 0.92160600  |
| H  | -5.91579300 | 0.57736600  | -0.66096700 |
| H  | -6.33912900 | -0.57774200 | 0.60291700  |
| C  | -4.46334000 | -2.18351000 | 4.49606900  |
| H  | -4.95126200 | -3.14362300 | 4.70794600  |
| H  | -3.39272500 | -2.36798600 | 4.38805300  |
| H  | -4.60075500 | -1.55074500 | 5.38032400  |
| C  | -6.57229600 | -1.27548300 | 3.47466300  |
| H  | -7.06625300 | -0.80653300 | 2.61970200  |
| H  | -7.09284600 | -2.21990800 | 3.67805500  |
| H  | -6.73283900 | -0.62703100 | 4.34342300  |
| C  | -3.41351200 | 1.38740000  | 5.12060300  |
| H  | -3.65212400 | 2.14629900  | 5.87664600  |
| H  | -3.39822100 | 0.41506100  | 5.62284400  |
| H  | -2.40212100 | 1.58458300  | 4.75279100  |
| C  | -4.49072300 | 2.85273800  | 3.36896600  |
| H  | -5.28208700 | 2.95225800  | 2.61961300  |
| H  | -4.68626100 | 3.59342200  | 4.15544200  |
| H  | -3.54375800 | 3.11975700  | 2.89217800  |
| C  | 0.64932900  | -1.92324900 | 2.52439100  |
| C  | -0.41262500 | -2.30429600 | 4.59354500  |
| C  | -0.47883200 | -2.90210400 | 2.18495500  |
| H  | -0.05004800 | -2.66933400 | 5.55484000  |
| H  | -1.19944700 | -1.56627600 | 4.75702900  |

|   |             |             |            |
|---|-------------|-------------|------------|
| H | -0.09115800 | -3.69428600 | 1.54433800 |
| C | -0.82069300 | -3.42845100 | 3.61430900 |
| H | -1.87401300 | -3.69539600 | 3.70070900 |
| H | -0.22013400 | -4.31684600 | 3.82650000 |
| O | 1.83520700  | -1.81228100 | 1.96451600 |
| C | 2.73388400  | -1.19034900 | 2.93106000 |
| H | 3.65167800  | -1.77861900 | 2.96494300 |
| H | 2.92122000  | -0.16594300 | 2.61425000 |
| C | 1.95954300  | -1.23206400 | 4.24118700 |
| O | 2.32964700  | -0.97261200 | 5.36283800 |
| N | 0.70090800  | -1.69022900 | 3.85997600 |

### 23

|    |             |             |             |
|----|-------------|-------------|-------------|
| Rh | 1.99815100  | -0.12507800 | -2.21251500 |
| O  | 0.51102900  | -1.40967900 | -2.80523400 |
| O  | 0.72058400  | 1.42910200  | -2.54903600 |
| O  | 3.38249900  | 1.21133800  | -1.49600500 |
| O  | 3.24810100  | -1.68637400 | -1.72679400 |
| Rh | 1.11017600  | -0.27665700 | 0.03442300  |
| C  | 3.16203200  | -2.15706600 | -0.56436200 |
| O  | 2.33281100  | -1.87642600 | 0.34561600  |
| C  | 3.29851300  | 1.52141900  | -0.27778700 |
| O  | 2.58276600  | 1.00612000  | 0.62053600  |
| C  | -0.33561000 | -1.75010900 | -1.93873300 |
| O  | -0.36483700 | -1.48098100 | -0.70533400 |
| O  | -0.06467800 | 1.33851100  | -0.41598900 |
| C  | -0.02812400 | 1.77784900  | -1.59513100 |
| C  | 5.20085300  | -2.44839800 | 0.89042500  |
| C  | -2.36165100 | 2.11768000  | -2.49865600 |
| C  | 4.25508600  | -3.14786300 | -0.12623900 |
| F  | 3.69655400  | -4.22599800 | 0.47315300  |
| F  | 4.97704900  | -3.56408200 | -1.19056200 |
| F  | 5.41514500  | -1.17256500 | 0.46760000  |
| F  | 4.59161100  | -2.40509900 | 2.09498600  |
| C  | 6.57853600  | -3.12979500 | 1.06761200  |
| F  | 7.20177600  | -2.59984500 | 2.12551900  |
| F  | 6.41339500  | -4.44382100 | 1.27218200  |
| F  | 7.33411900  | -2.94498700 | -0.01898200 |
| C  | 4.09004300  | 2.77444000  | 0.13448700  |
| F  | 4.14241600  | 2.87578100  | 1.48441300  |
| F  | 5.34962000  | 2.72876000  | -0.35167000 |
| C  | 3.37631400  | 4.03302700  | -0.44091500 |
| C  | 3.70139900  | 5.35270100  | 0.29863800  |
| F  | 2.02967600  | 3.83781500  | -0.36800200 |

|   |             |             |             |
|---|-------------|-------------|-------------|
| F | 3.71783500  | 4.17027900  | -1.73776500 |
| F | 3.09927000  | 5.37739300  | 1.49343000  |
| F | 3.26614100  | 6.38754400  | -0.42632400 |
| F | 5.02505700  | 5.46499200  | 0.47018000  |
| C | -1.09524900 | 2.82844800  | -1.95513300 |
| C | -1.53825000 | -2.57692100 | -2.43519500 |
| F | -1.43287000 | 3.55579500  | -0.86839700 |
| F | -0.61953100 | 3.65944100  | -2.91261700 |
| F | -2.02404300 | 1.45958400  | -3.63417300 |
| F | -2.76978800 | 1.20882600  | -1.57967200 |
| C | -3.55348700 | 3.04892400  | -2.82561700 |
| F | -4.02791400 | 3.61084600  | -1.70910900 |
| F | -3.17368800 | 4.01157900  | -3.67436700 |
| F | -4.52573800 | 2.32918900  | -3.40042300 |
| F | -1.36897400 | -2.92177900 | -3.73061800 |
| F | -2.65020900 | -1.80120700 | -2.33619200 |
| C | -1.74359500 | -3.86868000 | -1.60651800 |
| F | -0.53154900 | -4.46206300 | -1.45317800 |
| F | -2.23172200 | -3.55337700 | -0.38645500 |
| C | -2.70902800 | -4.89843800 | -2.24311600 |
| F | -2.98903100 | -5.85137400 | -1.34734100 |
| F | -2.15396400 | -5.46368000 | -3.31856300 |
| F | -3.85046100 | -4.29280700 | -2.60260900 |
| O | 0.61276100  | -0.58060300 | 2.19052800  |
| C | -0.70396500 | -0.60110800 | 2.82051400  |
| C | 1.61939800  | -0.15820700 | 3.13268600  |
| N | -0.40287500 | -0.39799100 | 4.24042900  |
| C | -1.66370200 | 0.38108400  | 2.21870000  |
| C | -1.40275300 | -1.99555300 | 2.74212900  |
| C | 0.93737200  | -0.26381000 | 4.47969300  |
| H | 1.93901400  | 0.86206100  | 2.92108300  |
| H | 2.46823100  | -0.84226900 | 3.07713200  |
| C | -1.24481300 | -1.28104500 | 5.05491900  |
| C | -2.82975700 | -0.24373700 | 1.89113900  |
| C | -1.41744100 | 1.82195900  | 2.12284100  |
| C | -2.82867900 | -1.70788800 | 2.24138300  |
| C | -1.32565000 | -2.54543400 | 4.18119500  |
| H | -0.86560800 | -2.62256200 | 2.02905400  |
| O | 1.48885300  | -0.25818700 | 5.56951200  |
| H | -0.76905600 | -1.43006400 | 6.02488300  |
| H | -2.22610600 | -0.82174300 | 5.20606100  |
| O | -0.13610500 | 2.12161200  | 2.45756900  |
| O | -2.22890800 | 2.67489700  | 1.80728300  |
| H | -3.57588900 | -1.89091000 | 3.02318500  |

|    |             |             |             |
|----|-------------|-------------|-------------|
| H  | -3.10959900 | -2.31943300 | 1.38331200  |
| H  | -0.40736800 | -3.12602200 | 4.31434900  |
| H  | -2.17600000 | -3.18399400 | 4.43176000  |
| C  | 0.24706600  | 3.49775700  | 2.31043100  |
| H  | -0.00862500 | 3.85986800  | 1.31424000  |
| H  | 1.32567600  | 3.52168300  | 2.46002000  |
| H  | -0.25110200 | 4.11848700  | 3.06068800  |
| O  | -3.88197400 | 0.33755900  | 1.34184000  |
| Si | -5.56556500 | 0.03844600  | 1.57364200  |
| C  | -5.90137700 | 0.10349100  | 3.44725600  |
| H  | -5.82630000 | -0.93549400 | 3.80141400  |
| C  | -5.97864300 | -1.68338900 | 0.88980500  |
| C  | -6.36078400 | 1.47400700  | 0.63980800  |
| H  | -7.42051000 | 1.47572500  | 0.93241200  |
| C  | -5.74131600 | 2.81595000  | 1.07443400  |
| H  | -4.66231700 | 2.83137600  | 0.89925400  |
| H  | -6.19340100 | 3.64578400  | 0.51642200  |
| H  | -5.90261000 | 3.00990000  | 2.13993600  |
| C  | -6.29356700 | 1.29661700  | -0.88646000 |
| H  | -6.91404600 | 0.46143500  | -1.22403700 |
| H  | -6.65009300 | 2.19996100  | -1.39626000 |
| H  | -5.27275300 | 1.11059800  | -1.22699700 |
| C  | -4.87725900 | 0.94134500  | 4.23393400  |
| H  | -5.13164900 | 0.94998600  | 5.30154200  |
| H  | -3.85998400 | 0.55142100  | 4.14277600  |
| H  | -4.85604000 | 1.98137100  | 3.89339000  |
| C  | -7.33236700 | 0.59374000  | 3.74167300  |
| H  | -7.54946500 | 0.52500600  | 4.81492900  |
| H  | -7.45831200 | 1.64232800  | 3.45071800  |
| H  | -8.09457300 | 0.01071900  | 3.21461100  |
| C  | -7.50021600 | -1.91835500 | 0.84152900  |
| H  | -7.99449700 | -1.21185000 | 0.16519100  |
| H  | -7.72300400 | -2.92843700 | 0.47510800  |
| H  | -7.96773500 | -1.81901800 | 1.82681900  |
| H  | -5.56403500 | -2.38124800 | 1.63111900  |
| C  | -5.32650800 | -2.00753200 | -0.46586800 |
| H  | -5.80018600 | -1.45232800 | -1.28030900 |
| H  | -4.26249100 | -1.76593400 | -0.48537000 |
| H  | -5.42800800 | -3.07473000 | -0.69724200 |
